# Supplementary material for: Synthesis of NH006—a photostable fungicide effective against Botrytis cinerea—according to the asymmetric total synthesis of MK8383
Source: Royal Society of Chemistry journal article supplement (doi:10.1039/b924096a), 2010-01-01

## Supplementary Information

### **Synthesis of NH006—a photostable fungicide effective against *Botrytis cinerea*—according to the asymmetric total synthesis of MK8383**

Nobuyuki Hayashi,<sup>a</sup> Kentaro Yamamoto,<sup>b</sup> Nobuto Minowa,<sup>b</sup> Masaaki Mitomi,<sup>b</sup> and Masahisa Nakada<sup>\*a</sup>

<sup>a</sup>*Department of Chemistry and Biochemistry, School of Advanced Science and Engineering, Waseda University*

*3-4-1 Ohkubo, Shinjuku-ku, Tokyo 169-8555, Japan.*

*Fax: +81352863240; Tel: +81352863240*

*E-mail: [mnakada@waseda.jp](mailto:mnakada@waseda.jp)*

<sup>b</sup>*Agricultural & Veterinary Research Labs Meiji Seika Kaisha, Ltd.*

*760 Morooka-cho, Kohoku-ku, Yokohama, Japan.*

*Fax: +81455453198; Tel: +81455412521*

## Table of Contents.

|                                                                  |          |
|------------------------------------------------------------------|----------|
| Title page                                                       | S1       |
| General Information, Materials                                   | S2       |
| Experimental Procedures                                          | S3-S37   |
| NMR Spectra of compounds ( $^1\text{H}$ and $^{13}\text{C}$ NMR) | S38-S117 |

**General Information.**  $^1\text{H}$  and  $^{13}\text{C}$  NMR spectra were recorded on a JEOL AL-400 spectrometer or JEOL Lambda 500 or Bruker AVANCE 600 spectrometer.  $^1\text{H}$  and  $^{13}\text{C}$  chemical shifts are reported in ppm downfield from tetramethylsilane (TMS,  $\delta$  scale) with the solvent resonances as internal standards. The following abbreviations were used to explain the multiplicities: s, singlet; d, doublet; t, triplet; q, quartet; m, multiplet; band, several overlapping signals; br, broad. IR spectra were recorded on a JASCO FT/IR-8300 or a HORIBA FT-730. Optical rotations were measured using a 2 ml cell with a 1 dm path length on a JASCO DIP-1000. Melting points (mp) are uncorrected, recorded on a Yanaco micro melting point apparatus MP-500P. Mass spectra and elemental analyses were provided at the Materials Characterization Central Laboratory, Waseda University. All reactions were carried out under an argon atmosphere with dry, freshly distilled solvents under anhydrous conditions, unless otherwise noted. All reactions were monitored by thin-layer chromatography carried out on 0.25 mm E. Merck silica gel plates (60F-254) using UV light as visualizing agent and phosphomolybdic acid and heat as developing agents. KANTO CHEMICAL silica gel (spherical, neutral, particle size 0.040-0.050 mm or 0.063-0.210) was used for flash chromatography. Preparative thin-layer chromatography (PTLC) separations were carried out on self-made 0.3 mm E. Merck silica gel plates (60F-254).

**Materials.** THF and Et<sub>2</sub>O were distilled from sodium/benzophenone ketyl. Toluene was distilled from sodium. MeOH was distilled with a small amount of magnesium and I<sub>2</sub>. Benzene, MeCN were distilled from CaH<sub>2</sub>, and all other reagents were purchased from Aldrich, TCI, or Kanto Chemical Co. Ltd.

## Total synthesis of compound 12

### (1*S*,4*S*,4*aS*,5*S*,6*S*,8*aS*)-6-(1-Ethoxy-ethoxymethyl)-4,7-dimethyl-1-triisopropylsilyloxy-5-triisopropylsilyloxymethyl-1,2,3,4,4*a*,5,6,8*a*-octahydro-naphthalene (**1a**)

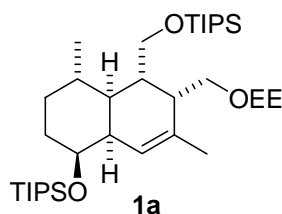

To a stirred solution of alcohol **1** (0.0464 g, 0.149 mmol) in CH<sub>2</sub>Cl<sub>2</sub> at -78 °C was added DBU (0.111 mL, 0.742 mmol) and TIPSOTf (0.0950 mL, 0.341 mmol) successively, and stirring was continued for 10 min at the same temperature. The reaction was quenched with saturated aqueous NH<sub>4</sub>Cl solution (6 mL), and the aqueous layer was extracted with CH<sub>2</sub>Cl<sub>2</sub> (6 mL×3). The combined organic layer was dried over Na<sub>2</sub>SO<sub>4</sub> and evaporated. The residue was purified by flash chromatography (hexane/ethyl acetate = 50/1) to afford TIPS ether **1a** (0.0892 g, 96%) as a colorless oil:

R<sub>f</sub> = 0.38 (hexane/ethyl acetate = 4/1); <sup>1</sup>H NMR (400 MHz, CDCl<sub>3</sub>) δ 5.68 (1H, s), 4.68 (1/2H, q, *J*=5.4 Hz), 4.64 (1/2H, q, *J*=5.4 Hz), 3.88-3.78 (3/2H, m), 3.70 (1H, ddd, *J*=11.2, 4.6, 4.6 Hz), 3.66-3.60 (1H, m), 3.60-3.43 (3H, m), 3.23 (1/2H, dd, *J*=9.3, 9.3 Hz), 2.66-2.59 (1H, m), 2.44-2.35 (1H, m), 2.32-2.22 (1H, m), 1.73-1.56 (6H, m), 1.43-1.25 (5H, m), 1.20 (3H, t, *J*=7.1 Hz), 1.12-0.92 (43H, m), 0.84 (3H, d, *J*=6.6 Hz); <sup>13</sup>C NMR (100 MHz, CDCl<sub>3</sub>) δ 132.4, 132.4, 123.5, 123.5, 100.1, 99.7, 73.7, 65.8, 65.1, 60.8, 60.7, 60.7, 60.5, 40.5, 40.4, 38.1, 37.9, 37.8, 37.6, 37.5, 33.8, 32.0, 28.3, 22.0, 22.0, 19.8, 19.8, 19.1, 18.2, 18.1, 15.4, 15.4, 12.5, 12.0; IR (CHCl<sub>3</sub>) ν<sub>max</sub> 2943, 2866, 1464, 1381, 1257, 1099, 1066, 1012, 995, 883, 814 cm<sup>-1</sup>; FAB HRMS [M-OEt]<sup>+</sup> calcd for C<sub>34</sub>H<sub>67</sub>O<sub>3</sub>Si<sub>2</sub>: 579.4629, found: 579.4629.

### (-)-(1*S*,2*S*,4*aS*,5*S*,8*S*,8*aS*)-(3,8-Dimethyl-5-triisopropylsilyloxy-1-triisopropylsilyloxymethyl-1,2,4*a*,5,6,7,8,8*a*-octahydro-naphthalen-2-yl)-methanol (**2**)

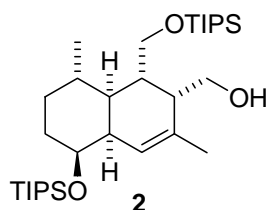

To a stirred solution of TIPS ether **1a** (0.0071 g, 0.0114 mmol) in ethanol (0.7 mL) was added acetic acid (0.14 mL) at room temperature, and the solution was stirred at 60 °C for 2 days. After cooling the reaction mixture, saturated aqueous NaHCO<sub>3</sub> solution was added to the reaction mixture till no evolution of CO<sub>2</sub> gas was observed, and the aqueous layer was extracted with Et<sub>2</sub>O (5 mL×3). The combined organic layer was washed with brine (5 mL) and dried over Na<sub>2</sub>SO<sub>4</sub> and evaporated. The residue was purified by flash chromatography (hexane/ethyl acetate = 30/1) to afford alcohol **2** (0.0047 g, 75%) as a colorless oil:

R<sub>f</sub> = 0.73 (hexane/ethyl acetate = 4/1); <sup>1</sup>H NMR (400 MHz, CDCl<sub>3</sub>) δ 5.65 (1H, s), 3.98-3.84 (2H, m), 3.71 (1H, dd, *J*=10.0, 10.0 Hz), 3.66 (1H, ddd, *J*=11.5, 4.6, 4.6 Hz), 3.48 (1H, dd, *J*=10.0, 1.5 Hz), 2.42-2.33 (1H, m), 2.31-2.19 (2H, m), 1.70 (3H, s), 1.65-1.55 (2H, m), 1.43-1.31 (1H, m), 1.30-1.00 (45H, m), 1.00-0.90 (1H, m), 0.87 (3H, d, *J*=6.3 Hz); <sup>13</sup>C NMR (100 MHz, CDCl<sub>3</sub>) δ 132.7, 122.4, 73.4, 67.2, 62.2, 46.2, 40.8, 39.2, 38.5, 33.3, 31.6, 28.6, 21.7, 18.9, 18.1, 17.9, 12.3, 11.8; IR (CHCl<sub>3</sub>) ν<sub>max</sub> 3502, 2943, 2866, 1464, 1383, 1248, 1215, 1111, 1068, 1014, 997, 883, 814, 798, 758 cm<sup>-1</sup>; FAB HRMS [M+H]<sup>+</sup> calcd for C<sub>32</sub>H<sub>65</sub>O<sub>3</sub>Si<sub>2</sub>: 553.4472, found: 553.4453; [α]<sub>D</sub><sup>28</sup> -27.3 (*c* 0.53, CHCl<sub>3</sub>).

**(+)-(1S,2R,3R,4aR,5S,8S,8aS)-(3,8-Dimethyl-5-triisopropylsilyloxy-1-triisopropylsilyloxymethyl-decahydro-naphthalen-2-yl)-methanol (3)**

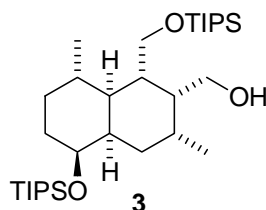

To a stirred suspension of Rh-Al<sub>2</sub>O<sub>3</sub> (0.307 g, 5 wt. %) in a degassed mixed solvent (methanol/acetic acid = 5/1, 1.5 mL) was added a solution of alcohol **2** (0.0954 g, 0.173 mmol) in a degassed mixed



solvent (methanol/acetic acid = 5/1, 2.5 mL), and the mixture was stirred under hydrogen atmosphere at room temperature for 4 h. After completion of the reaction, the reaction mixture was filtered through a pad of Celite. The residue on Celite was washed with a small amount of Et<sub>2</sub>O, and the filtrate and washings were partitioned between Et<sub>2</sub>O (7 mL) and saturated aqueous NaHCO<sub>3</sub> solution (7 mL). The aqueous layer was extracted with Et<sub>2</sub>O (7 mL×3). The combined organic layer was washed with brine (5 mL) and dried over Na<sub>2</sub>SO<sub>4</sub> and evaporated. The residue was purified by flash chromatography (hexane/ethyl acetate = 20/1) to afford alcohol **3** (0.0426 g, 81%) as a colorless oil and **2** (0.0133 g, 14%).

R<sub>f</sub> = 0.67 (hexane/ethyl acetate = 4/1); <sup>1</sup>H NMR (400 MHz, CDCl<sub>3</sub>) δ 3.83 (1H, dd, *J*=9.5, 5.9 Hz), 3.80-3.70 (2H, m), 3.65-3.55 (2H, m), 2.18-1.89 (5H, m), 1.76-1.50 (6H, m), 1.36-1.28 (1H, m), 1.16-0.94 (43H, m), 0.88 (3H, d, *J*=7.3 Hz), 0.84 (3H, d, *J*=6.1 Hz); <sup>13</sup>C NMR (100 MHz, CDCl<sub>3</sub>) δ 73.8, 65.1, 64.3, 45.0, 40.0, 39.8, 34.3, 34.2, 30.2, 28.7, 26.8, 26.5, 19.7, 18.1, 18.0, 16.1, 12.4, 11.9; IR (CHCl<sub>3</sub>) ν<sub>max</sub> 3378, 2943, 2866, 1464, 1383, 1248, 1215, 1093, 1066, 1012, 883, 816, 760 cm<sup>-1</sup>; FAB HRMS [M+H]<sup>+</sup> calcd for C<sub>32</sub>H<sub>67</sub>O<sub>3</sub>Si<sub>2</sub>: 555.4629, found: 555.4613; [α]<sub>D</sub><sup>26</sup> +7.3 (*c* 0.70, CHCl<sub>3</sub>).

**(-)-(1S,2R,3R,4aR,5S,8S,8aS)-3,8-Dimethyl-5-triisopropylsilyloxy-1-triisopropylsilyloxymethyl-decahydro-naphthalene-2-carbaldehyde (4)**

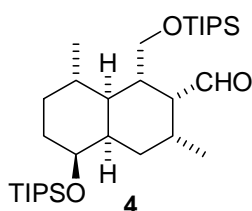

To a stirred solution of alcohol **3** (0.1393 g, 0.251 mmol) in CH<sub>2</sub>Cl<sub>2</sub> (3 mL) was added Dess-Martin periodinane (0.748 g, 1.76 mmol), and the mixture was stirred at room temperature for 1 h. The reaction mixture was diluted with Et<sub>2</sub>O (3 mL), and to the solution was added saturated aqueous NaHCO<sub>3</sub> solution (3 mL) and saturated aqueous Na<sub>2</sub>S<sub>2</sub>O<sub>3</sub> solution (6 mL), and the aqueous layer was extracted with Et<sub>2</sub>O (7 mL × 3). The combined organic layer was washed with brine (5 mL), dried over Na<sub>2</sub>SO<sub>4</sub>,

and evaporated. The residue was purified by flash chromatography (hexane/ethyl acetate = 60/1) to afford aldehyde **4** (0.131 g, 95%) as a colorless oil:

$R_f$  = 0.60 (hexane/ethyl acetate = 10/1);  $^1\text{H}$  NMR (400 MHz,  $\text{CDCl}_3$ )  $\delta$  9.74 (1H,s), 3.78 (1H, ddd,  $J=10.5, 4.9, 4.9$  Hz), 3.74-3.66 (2H, m), 2.65-2.57 (1H, m), 2.55-2.46 (1H, m), 2.44-2.38 (1H, m), 2.21-2.11 (1H, m), 1.78-1.49 (6H, m), 1.42-1.34 (1H, m), 1.14-1.01 (43H, m), 0.98 (3H, d,  $J=7.1$  Hz), 0.89 (3H, d,  $J=6.1$  Hz);  $^{13}\text{C}$  NMR (100 MHz,  $\text{CDCl}_3$ )  $\delta$  204.5, 73.6, 64.5, 51.2, 43.2, 39.5, 34.1, 30.1, 27.1, 27.0, 26.0, 19.6, 18.1, 18.0, 18.0, 16.6, 12.3, 12.0; IR ( $\text{CHCl}_3$ )  $\nu_{\text{max}}$  2943, 2893, 1724, 1464, 1383, 1246, 1095, 1068, 1012, 995, 881, 825, 793  $\text{cm}^{-1}$ ; FAB HRMS  $[\text{M}-\text{H}]^+$  calcd for  $\text{C}_{32}\text{H}_{63}\text{O}_3\text{Si}_2$ : 551.4316, found: 551.4324;  $[\alpha]_{\text{D}}^{26} -10.3$  ( $c$  0.58,  $\text{CHCl}_3$ ).

**(4R,5aR,6S,9S,9aS,9bS)-dodecahydro-4,9-dimethylnaphtho[2,1-c]furan-3,6-diol (4a)**

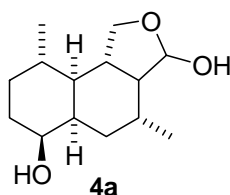

To a stirred solution of **4** (0.0458 g, 0.0828 mmol) in THF (1 mL) was added a solution of TBAF in THF (0.415 mL, 1.0 M), and the reaction mixture was stirred at room temperature for 0.5 h, and then, refluxed for 1 h. The reaction was quenched with saturated aqueous  $\text{NH}_4\text{Cl}$  solution (2 mL), and extracted with EtOAc (2 mL  $\times$  3). The combined organic layer was washed with brine (3 mL), dried over  $\text{Na}_2\text{SO}_4$ , and evaporated. The residue was purified by flash chromatography (hexane/ethyl acetate = 1/1) to afford hydroxylactol **4a** as a colorless oil, which was immediately used for the next reaction:

$R_f$  = 0.26 (hexane/ethyl acetate = 1/1).

**(3aS,4R,5aR,9S,9aS,9bS)-decahydro-4,9-dimethylnaphtho[2,1-c]furan-3,6-dione (5)**

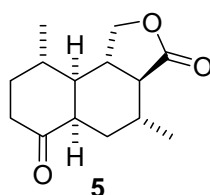

To a stirred solution of hydroxylactol **4a** in CH<sub>2</sub>Cl<sub>2</sub> (1.5 mL) was added Dess-Martin periodinane (0.1280 g, 0.302 mmol), and the mixture was stirred over night. The reaction mixture was diluted with Et<sub>2</sub>O (1.5 mL), and to the solution was added saturated aqueous NaHCO<sub>3</sub> solution (1.5 mL) and saturated aqueous Na<sub>2</sub>S<sub>2</sub>O<sub>3</sub> solution (3 mL), and the aqueous layer was extracted with Et<sub>2</sub>O (4 mL × 3). The combined organic layer was washed with brine (4 mL), dried over Na<sub>2</sub>SO<sub>4</sub>, and evaporated. The residue was purified by flash chromatography (hexane/ethyl acetate = 60/1) to afford ketolactone **5**, which was further purified by recrystallization (CH<sub>2</sub>Cl<sub>2</sub>/hexane) to afford pure **5** (0.0078 g, 40% (2 steps)) as a white crystal. A single crystal was obtained by recrystallization (Et<sub>2</sub>O/hexane):

R<sub>f</sub> = 0.54 (hexane/ethyl acetate = 1/1); mp 159-161 °C

**(+)-(1*S*,2*R*,3*R*,4*aR*,5*S*,8*S*,8*aS*)-2-(2,2-Dibromo-vinyl)-3,8-dimethyl-5-triisopropylsilyloxy-1-triisopropylsilyloxymethyl-decahydro-naphthalene (4b)**

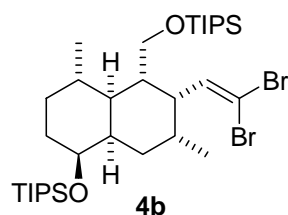

To a stirred solution of CBr<sub>4</sub> (0.0303 g, 0.0914 mmol) in CH<sub>2</sub>Cl<sub>2</sub> (0.5 mL) was added PPh<sub>3</sub> (0.0601 g, 0.229 mmol), and the mixture was stirred at room temperature for 10 min. To the reaction mixture was added a solution of aldehyde **4** (0.0293 g, 0.0529 mmol) in CH<sub>2</sub>Cl<sub>2</sub> (0.5 mL), and the resultant solution was stirred at room temperature. After 1 h, to the reaction mixture was added a solution prepared by mixing CBr<sub>4</sub> (0.0306 g, 0.0923 mmol) and PPh<sub>3</sub> (0.0576 g, 0.220 mmol) in CH<sub>2</sub>Cl<sub>2</sub> (0.5 mL), and the reaction mixture was stirred for 1 h. The reaction was quenched with saturated aqueous NaHCO<sub>3</sub> solution (4 mL), and the aqueous layer was extracted with CH<sub>2</sub>Cl<sub>2</sub> (4 mL × 3). The combined organic layer was dried over Na<sub>2</sub>SO<sub>4</sub> and evaporated. The residue was diluted with hexane, and the precipitate was removed filtration. The filtrate was evaporated and the residue was purified by flash chromatography (hexane) to afford dibromide **4b** (0.0314 g, 84%) as a colorless oil:

$R_f = 0.68$  (hexane/ethyl acetate = 10/1);  $^1\text{H NMR}$  (400 MHz,  $\text{CDCl}_3$ )  $\delta$  6.59 (1H, d,  $J=9.8$  Hz), 3.78 (1H, ddd,  $J=10.2, 4.9, 4.9$  Hz), 3.70 (1H, dd,  $J=9.5, 9.5$  Hz), 3.65 (1H, dd,  $J=9.5, 4.1$  Hz), 2.77-2.71 (1H, m), 2.16-2.05 (2H, m), 2.04-1.95 (1H, m), 1.79-1.53 (6H, m), 1.46-1.39 (1H, m), 1.14-0.99 (43H, m), 0.91 (3H, d,  $J=7.6$  Hz), 0.89 (3H, d,  $J=7.1$  Hz);  $^{13}\text{C NMR}$  (100 MHz,  $\text{CDCl}_3$ )  $\delta$  140.2, 88.2, 73.7, 63.3, 43.3, 43.1, 42.3, 32.7, 30.4, 30.2, 27.2, 19.8, 18.1, 18.1, 18.1, 18.0, 16.6, 12.4, 12.0; IR ( $\text{CHCl}_3$ )  $\nu_{\text{max}}$  2943, 2891, 1601, 1464, 1383, 1244, 1095, 1068, 1012, 995, 883, 831  $\text{cm}^{-1}$ ; FAB HRMS  $[\text{M}+\text{H}]^+$  calcd for  $\text{C}_{33}\text{H}_{65}\text{Br}_2\text{O}_2\text{Si}_2$ : 707.2890, found: 707.2870;  $[\alpha]_{\text{D}}^{30} +20.9$  ( $c$  0.59,  $\text{CHCl}_3$ ).

**(-)-(1S,2R,3R,4aR,5S,8S,8aS)-2-Ethynyl-3,8-dimethyl-5-triisopropylsilyloxy-1-triisopropylsilyloxymethyl-decahydro-naphthalene (6)**

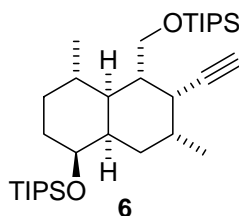

To a stirred solution of dibromide **4b** (0.0747 g, 0.105 mmol) in THF (1 mL) was added *n*-BuLi in hexane (0.141 mL, 1.57 M) dropwise at  $-78$  °C, and the reaction mixture was stirred at the same temperature for 15 min. The reaction was quenched with saturated aqueous  $\text{NH}_4\text{Cl}$  solution (2 mL), and the aqueous layer was extracted with  $\text{Et}_2\text{O}$  (3 mL $\times$ 3). The combined organic layer was washed with brine (3 mL), dried over  $\text{Na}_2\text{SO}_4$ , and evaporated. The residue was purified by flash chromatography (hexane/ethyl acetate = 60/1) to afford alkyne **6** (0.0560 g, 97%) as a colorless oil:

$R_f = 0.38$  (hexane/ethyl acetate = 30/1);  $^1\text{H NMR}$  (400 MHz,  $\text{CDCl}_3$ )  $\delta$  3.99-3.88 (1H, m), 3.85-3.75 (1H, m), 3.70 (1H, dd,  $J=9.3, 9.0$  Hz), 2.88-2.81 (1H, m), 2.23-1.99 (4H, m), 1.78-1.68 (1H, m), 1.67-1.48 (5H, m), 1.43-1.35 (1H, m), 1.13-1.01 (43H, m), 0.97 (3H, d,  $J=7.1$  Hz), 0.87 (3H, d,  $J=6.3$  Hz);  $^{13}\text{C NMR}$  (100 MHz,  $\text{CDCl}_3$ )  $\delta$  86.0, 73.8, 70.8, 63.5, 42.6, 42.0, 32.8, 30.9, 30.0, 27.9, 19.6, 18.2, 18.1, 18.1, 17.6, 12.5, 12.3, 12.0, 11.7; IR ( $\text{CHCl}_3$ )  $\nu_{\text{max}}$  3311, 2943, 2866, 1464, 1381, 1246, 1093, 1068, 1012, 995, 883, 816, 798  $\text{cm}^{-1}$ ; FAB HRMS  $[\text{M}-\text{H}]^+$  calcd for  $\text{C}_{33}\text{H}_{63}\text{O}_2\text{Si}_2$ : 547.4367, found: 547.4358;  $[\alpha]_{\text{D}}^{26} -3.0$  ( $c$  0.66,  $\text{CHCl}_3$ ).

**(+)-(1*S*,2*R*,3*R*,4*aR*,5*S*,8*S*,8*aS*)-2-[(*E*)-2-Iodo-1-methyl-vinyl]-3,8-dimethyl-5-triisopropylsilyloxy-1-triisopropylsilyloxymethyl-decahydro-naphthalene (7)**

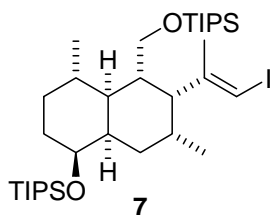

To a stirred solution of  $\text{Cp}_2\text{ZrCl}_2$  (0.302 g, 1.03 mmol) in  $\text{CH}_2\text{Cl}_2$  (1 mL) was added  $\text{Me}_3\text{Al}$  in hexane (2.91 mL, 1.05 M) at 0 °C, and the reaction mixture was warmed to room temperature. After 30 min, the reaction mixture was cooled to -30 °C, and to the reaction mixture was added  $\text{H}_2\text{O}$  (0.0184 mL, 1.02 mmol) dropwise and warmed to -10 °C. After 10 min, the reaction mixture was cooled to -30 °C again, and to the reaction mixture was added a solution of alkyne **6** in  $\text{CH}_2\text{Cl}_2$  (1.8 mL). The reaction mixture was stirred at the same temperature for 2.5 h. After checking the disappearance of the starting material by TLC, a solution of  $\text{I}_2$  (0.388 g, 1.53 mmol) in THF (1 mL) was added to the reaction mixture, and stirring was continued at the same temperature for 1 h. The reaction was quenched with saturated aqueous  $\text{NH}_4\text{Cl}$  solution (5 mL), and the aqueous layer was extracted with  $\text{Et}_2\text{O}$  (10 mL $\times$ 3). The combined organic layer was washed with brine (5 mL), dried over  $\text{Na}_2\text{SO}_4$ , and evaporated. The residue was purified by flash chromatography (hexane) to afford iodoalkene **7** (0.0585 g, 83%) as a colorless oil:

$R_f = 0.48$  (hexane/ethyl acetate = 30/1);  $^1\text{H NMR}$  (400 MHz,  $\text{CDCl}_3$ )  $\delta$  6.08 (1H, s), 3.77 (1H, ddd,  $J=10.7, 5.1, 5.1$  Hz), 3.66-3.56 (2H, m), 2.41-2.28 (3H, m), 2.19-2.10 (1H, m), 1.90 (3H, s), 1.74-1.48 (6H, m), 1.46-1.39 (1H, m), 1.16-0.98 (43H, m), 0.85 (3H, d,  $J=6.3$  Hz), 0.75 (3H, d,  $J=7.1$  Hz);  $^{13}\text{C NMR}$  (100 MHz,  $\text{CDCl}_3$ )  $\delta$  148.4, 73.8, 63.2, 46.2, 44.8, 41.7, 34.3, 33.3, 30.4, 29.6, 27.2, 26.8, 24.6, 19.7, 18.1, 18.1, 18.1, 18.0, 15.7, 12.3, 11.9; IR ( $\text{CHCl}_3$ )  $\nu_{\text{max}}$  2941, 2866, 1601, 1462, 1383, 1257, 1092, 1066, 1012, 995, 918, 883, 822, 787  $\text{cm}^{-1}$ ; FAB HRMS  $[\text{M}-\text{H}]^+$  calcd for  $\text{C}_{34}\text{H}_{66}\text{IO}_2\text{Si}_2$ : 689.3646, found: 689.3652;  $[\alpha]_{\text{D}}^{27} +4.9$  ( $c$  0.71,  $\text{CHCl}_3$ ).

**(+)-(1*S*,2*R*,3*R*,4*aR*,5*S*,8*S*,8*aS*)-3,8-Dimethyl-2-[(*E*)-1-methyl-propenyl]-5-triisopropylsilanyloxy-1-triisopropylsilanyloxymethyl-decahydro-naphthalene (7a)**

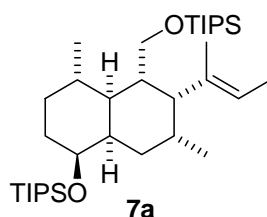

To a mixture of PdCl<sub>2</sub>(PPh<sub>3</sub>)<sub>2</sub> (0.0030g, 0.00427 mmol) and iodoalkene **7** (0.0585 g, 0.0847 mmol) in THF (1 mL) was added a solution of Me<sub>2</sub>Zn in THF (0.127 mL, 1.0 M) dropwise at room temperature, and the reaction mixture was stirred at the same temperature for 30 min. The reaction was quenched with saturated aqueous NH<sub>4</sub>Cl solution (2 mL), and the aqueous layer was extracted with Et<sub>2</sub>O (3 mL×3). The combined organic layer was washed with brine (3 mL), dried over Na<sub>2</sub>SO<sub>4</sub>, and evaporated. The residue was purified by flash chromatography (hexane) to afford alkene **7a** (0.0472 g, 96%) as a colorless oil:

R<sub>f</sub> = 0.42 (hexane); <sup>1</sup>H NMR (400 MHz, CDCl<sub>3</sub>) δ 5.36 (1H, q, *J*=6.1 Hz), 3.77 (1H, ddd, *J*=10.7, 5.1, 5.1 Hz), 3.67 (1H, dd, *J*=9.0, 1.0 Hz), 3.57 (1H, dd, *J*=9.0, 9.0 Hz), 2.34-2.21 (3H, m), 2.21-2.10 (1H, m), 1.74-1.54 (12H, m), 1.47-1.40 (1H, m), 1.10-0.99 (43H, m), 0.85 (3H, d, *J*=6.1 Hz), 0.74 (3H, d, *J*=6.8 Hz); <sup>13</sup>C NMR (100 MHz, CDCl<sub>3</sub>) δ 136.5, 117.9, 74.0, 63.0, 44.5, 44.0, 41.2, 34.4, 33.5, 30.5, 29.1, 27.2, 27.0, 19.8, 18.2, 18.1, 18.1, 18.0, 15.7, 15.1, 13.6, 12.4, 12.0; IR (CHCl<sub>3</sub>) ν<sub>max</sub> 2941, 2866, 1658, 1464, 1383, 1257, 1092, 1066, 1012, 995, 908, 883, 818, 766, 737 cm<sup>-1</sup>; FAB HRMS [M-H]<sup>+</sup> calcd for C<sub>35</sub>H<sub>69</sub>O<sub>2</sub>Si<sub>2</sub>: 577.4836, found: 577.4846; [α]<sub>D</sub><sup>28</sup> +8.9 (*c* 0.57, CHCl<sub>3</sub>).

**(+)-(1*S*,4*S*,4*aS*,5*S*,6*R*,7*R*,8*aR*)-5-Hydroxymethyl-4,7-dimethyl-6-[(*E*)-1-methyl-propenyl]-decahydro-naphthalen-1-ol (8)**

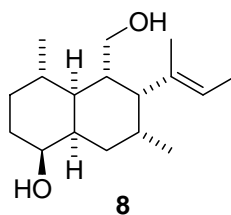

To a stirred solution of **7a** (0.0447 g, 0.0772 mmol) in THF (1.5 mL) was added a solution of TBAF in THF (0.772 mL, 1.0 M), and the reaction mixture was refluxed for 1 h. The reaction was quenched with saturated aqueous NH<sub>4</sub>Cl solution (3 mL), and extracted with Et<sub>2</sub>O (4 mL × 3). The combined organic layer was washed with brine (3 mL), dried over Na<sub>2</sub>SO<sub>4</sub>, and evaporated. The residue was purified by flash chromatography (hexane/ethyl acetate = 1/2) to afford diol **8** (0.0206 g, 100%) as a colorless oil:

R<sub>f</sub> = 0.23 (hexane/ethyl acetate = 1/1); <sup>1</sup>H NMR (400 MHz, CDCl<sub>3</sub>) δ 5.36 (1H, q, *J*=6.1 Hz), 3.77 (1H, ddd, *J*=11.7, 4.9, 4.9 Hz), 3.71 (1H, dd, *J*=10.5, 1.7 Hz), 3.57 (1H, dd, *J*=10.5, 8.5 Hz), 2.39-2.18 (4H, m), 1.80-1.45 (14H, m), 1.44-1.35 (1H, m), 1.16-1.02 (1H, m), 0.89 (3H, d, *J*=6.3 Hz), 0.80 (3H, d, *J*=7.1 Hz); <sup>13</sup>C NMR (100 MHz, CDCl<sub>3</sub>) δ 136.2, 118.3, 73.3, 62.9, 44.5, 43.9, 40.9, 33.9, 32.7, 29.8, 28.8, 27.1, 26.7, 19.6, 15.8, 15.4, 13.7; IR (CHCl<sub>3</sub>) ν<sub>max</sub> 3400, 2929, 2870, 1631, 1454, 1381, 1215, 1034, 1001, 758 cm<sup>-1</sup>; FAB HRMS [M+H]<sup>+</sup> calcd for C<sub>17</sub>H<sub>31</sub>O<sub>2</sub>: 267.2324, found: 267.2324; [α]<sub>D</sub><sup>27</sup> +2.8 (*c* 0.63, CHCl<sub>3</sub>).

**(+)-(1*S*,4*S*,4*aS*,5*S*,6*R*,7*R*,8*aR*)-5-(*tert*-Butyl-dimethyl-silyloxyethyl)-4,7-dimethyl-6-[(*E*)-1-methyl-propenyl]-decahydro-naphthalen-1-ol (8a)**

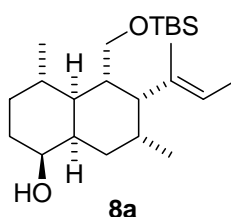

To a stirred solution of diol **8** (0.0223 g, 0.0837 mmol) in CH<sub>2</sub>Cl<sub>2</sub> (1 mL) was added imidazole (0.0325 g, 0.477 mmol) and TBSCl (0.0271 g, 0.180 mmol) successively at room temperature, and the reaction mixture was stirred at the same temperature for 2.5 h. The reaction was quenched with saturated

aqueous NH<sub>4</sub>Cl solution (2 mL), and extracted with CH<sub>2</sub>Cl<sub>2</sub> (3 mL × 3). The combined organic layer was dried over Na<sub>2</sub>SO<sub>4</sub> and evaporated. The residue was purified by flash chromatography (hexane/ethyl acetate = 10/1) to afford TBS ether **8a** as a white solid:

R<sub>f</sub> = 0.82 (hexane/ethyl acetate = 1/1); mp 84-88 °C; <sup>1</sup>H NMR (400 MHz, CDCl<sub>3</sub>) δ 5.32 (1H, q, *J*=6.6 Hz), 3.73 (1H, ddd, *J*=11.7, 4.9, 4.9 Hz), 3.55 (1H, dd, *J*=9.5, 1.7 Hz), 3.45 (1H, dd, *J*=9.5, 8.8 Hz), 2.34-2.12 (4H, m), 1.77-1.35 (14H, m), 1.11-0.98 (1H, m), 0.90-0.84 (9H, m), 0.83 (3H, d, *J*=6.3 Hz), 0.77 (3H, d, *J*=7.3 Hz), 0.06-0.00 (6H, m); <sup>13</sup>C NMR (100 MHz, CDCl<sub>3</sub>) δ 136.3, 118.0, 73.5, 62.5, 44.2, 40.8, 34.1, 32.6, 29.9, 28.8, 27.1, 26.8, 25.9, 19.7, 18.2, 16.0, 15.3, 13.7, -5.2, -5.3; IR (CHCl<sub>3</sub>) ν<sub>max</sub> 3367, 2929, 2858, 1462, 1381, 1362, 1255, 1215, 1080, 1005, 835, 762 cm<sup>-1</sup>; FAB HRMS [M+H]<sup>+</sup> calcd for C<sub>23</sub>H<sub>45</sub>O<sub>2</sub>Si: 381.3189, found: 381.3187; [α]<sub>D</sub><sup>26</sup> +11.6 (*c* 0.51, CHCl<sub>3</sub>).

**(+)-Benzoic acid (1*S*,4*S*,4*aS*,5*S*,6*R*,7*R*,8*aR*)-5-(*tert*-butyl-dimethyl-silanyloxymethyl)-4,7-dimethyl-6-[(*E*)-1-methyl-propenyl]-decahydro-naphthalen-1-yl ester (9)**

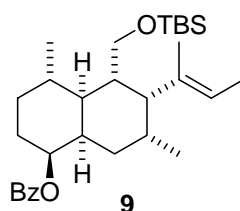

To a stirred solution of TBS ether **8a** (0.0228 g, 0.0599 mmol) in CH<sub>2</sub>Cl<sub>2</sub> (1 mL) was added DMAP (0.0373 g, 0.305 mmol) and Bz<sub>2</sub>O (0.0417 g, 0.184 mmol) successively, and the reaction mixture was stirred at room temperature for 3 h. The reaction was quenched with saturated aqueous NH<sub>4</sub>Cl solution (2 mL), and extracted with CH<sub>2</sub>Cl<sub>2</sub> (3 mL × 3). The combined organic layer was dried over Na<sub>2</sub>SO<sub>4</sub> and evaporated. The residue was purified by flash chromatography (hexane/ethyl acetate = 50/1) to afford benzoate **9** as a colorless oil:

R<sub>f</sub> = 0.35 (hexane/ethyl acetate = 10/1); <sup>1</sup>H NMR (400 MHz, CDCl<sub>3</sub>) δ 8.06-7.98 (2H, m), 7.56-7.48 (1H, m), 7.45-7.37 (2H, m), 5.31 (1H, q, *J*=6.1 Hz), 5.08 (1H, ddd, *J*=11.2, 4.9, 4.9 Hz), 3.53 (1H, dd, *J*=9.8, 1.7 Hz), 3.45 (1H, dd, *J*=9.5, 8.5 Hz), 2.45-2.35 (1H, m), 2.33-2.21 (3H, m), 1.88-1.68 (5H, m), 1.64-1.50 (8H, m), 1.26-1.10 (1H, m), 0.91-0.83 (12H, m), 0.73 (3H, d, *J*=6.8 Hz), 0.07-0.00 (6H, m);



$^{13}\text{C}$  NMR (100 MHz,  $\text{CDCl}_3$ )  $\delta$  165.9, 136.2, 132.7, 131.0, 129.5, 128.3, 118.2, 76.4, 62.4, 44.0, 43.9, 40.9, 33.8, 30.3, 28.8, 28.2, 27.3, 26.4, 25.9, 19.7, 18.2, 16.0, 15.3, 13.7, -5.2, -5.3; IR ( $\text{CHCl}_3$ )  $\nu_{\text{max}}$  2929, 2856, 1716, 1603, 1585, 1450, 1381, 1362, 1315, 1275, 1217, 1176, 1115, 1070, 1026, 982, 837, 760  $\text{cm}^{-1}$ ; FAB HRMS  $[\text{M}-\text{H}]^+$  calcd for  $\text{C}_{30}\text{H}_{47}\text{O}_3\text{Si}$ : 483.3294, found: 483.3284;  $[\alpha]_{\text{D}}^{28} +44.7$  ( $c$  0.63,  $\text{CHCl}_3$ ).

**(+)-Benzoic acid (1*S*,4*S*,4*aS*,5*S*,6*R*,7*R*,8*aR*)-5-hydroxymethyl-4,7-dimethyl-6-[(*E*)-1-methylpropenyl]-decahydro-naphthalen-1-yl ester (9a)**

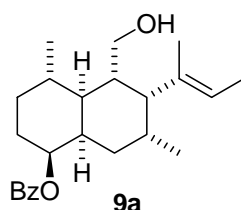

To a stirred solution of benzoate **9** (0.0352 g, 0.0726 mmol) in THF (2 mL) was added a solution of TBAF in THF (0.436 mL, 1.0M) at room temperature, and the reaction mixture was stirred at the same temperature for 2 days. The reaction was quenched with saturated aqueous  $\text{NH}_4\text{Cl}$  solution (4 mL), and extracted with  $\text{Et}_2\text{O}$  (6 mL  $\times$  3). The combined organic layer was washed with brine (5 mL), dried over  $\text{Na}_2\text{SO}_4$ , and evaporated. The residue was purified by flash chromatography (hexane/ethyl acetate = 8/1) to afford diol **9a** (0.0264, 98%) as a colorless oil:

$R_f = 0.30$  (hexane/ethyl acetate = 4/1);  $^1\text{H}$  NMR (400 MHz,  $\text{CDCl}_3$ )  $\delta$  8.09-8.00 (2H, m), 7.59-7.51 (1H, m), 7.48-7.40 (2H, m), 5.37 (1H, q,  $J=6.6$  Hz), 5.13 (1H, ddd,  $J=11.5, 4.9, 4.9$  Hz), 3.69 (1H, dd,  $J=10.0, 2.0$  Hz), 3.59 (1H, dd,  $J=10.0, 8.8$  Hz), 2.53-2.43 (1H, m), 2.38-2.26 (3H, m), 1.91-1.50 (14H, m), 1.28-1.16 (1H, m), 0.94 (3H, d,  $J=6.3$  Hz), 0.77 (3H, d,  $J=6.8$  Hz);  $^{13}\text{C}$  NMR (100 MHz,  $\text{CDCl}_3$ )  $\delta$  165.8, 136.1, 132.7, 130.9, 129.5, 128.3, 118.5, 76.2, 62.8, 44.2, 43.9, 40.8, 35.6, 30.3, 28.8, 28.0, 27.3, 26.4, 19.6, 15.9, 15.4, 13.7; IR ( $\text{CHCl}_3$ )  $\nu_{\text{max}}$  3452, 2929, 1712, 1603, 1585, 1450, 1381, 1315, 1282, 1217, 1176, 1117, 1070, 1026, 980, 758  $\text{cm}^{-1}$ ; FAB HRMS  $[\text{M}-\text{H}]^+$  calcd for  $\text{C}_{24}\text{H}_{35}\text{O}_3$ : 371.2586, found: 371.2583;  $[\alpha]_{\text{D}}^{25} +30.2$  ( $c$  0.67,  $\text{CHCl}_3$ ).

**(+)-Benzoic acid (1*S*,4*S*,4*aR*,5*S*,6*R*,7*R*,8*aR*)-5-formyl-4,7-dimethyl-6-[(*E*)-1-methyl-propenyl]-decahydro-naphthalen-1-yl ester (10)**

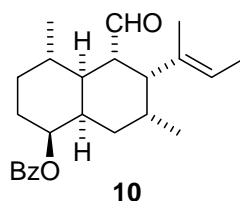

To a stirred solution of alcohol **9a** (0.0220 g, 0.0594 mmol) in CH<sub>2</sub>Cl<sub>2</sub> (1.5 mL) was added Dess-Martin periodinane (0.0768 g, 0.181 mmol), and the mixture was stirred at room temperature. After disappearance of the starting material, the reaction mixture was diluted with Et<sub>2</sub>O (1.5 mL), and to the solution was added saturated aqueous NaHCO<sub>3</sub> solution (1.5 mL) and saturated aqueous Na<sub>2</sub>S<sub>2</sub>O<sub>3</sub> solution (3 mL), and the aqueous layer was extracted with Et<sub>2</sub>O (5 mL × 3). The combined organic layer was washed with brine (5 mL), dried over Na<sub>2</sub>SO<sub>4</sub>, and evaporated. The residue was purified by flash chromatography (hexane/ethyl acetate = 20/1) to afford **10** (0.0198 g, 90%) as a colorless oil:

R<sub>f</sub> = 0.60 (hexane/ethyl acetate = 4/1); <sup>1</sup>H NMR (400 MHz, CDCl<sub>3</sub>) δ 9.99 (1H, s), 8.04-7.98 (2H, m), 7.57-7.51 (1H, m), 7.47-7.40 (2H, m), 5.34 (1H, q, *J*=6.6 Hz), 5.15 (1H, ddd, *J*=11.7, 4.9, 4.9 Hz), 2.91-2.84 (1H, m), 2.61-2.54 (1H, m), 2.54-2.44 (1H, m), 2.35-2.26 (1H, m), 2.12-2.04 (1H, m), 1.98-1.74 (4H, m), 1.72 (3H, s), 1.71-1.62 (5H, m), 1.34-1.20 (1H, m), 0.89 (3H, d, *J*=6.7 Hz), 0.85 (3H, d, *J*=7.3 Hz); <sup>13</sup>C NMR (100 MHz, CDCl<sub>3</sub>) δ 206.4, 165.6, 134.8, 132.7, 130.9, 129.5, 128.3, 119.7, 75.2, 48.9, 43.3, 42.0, 33.3, 31.2, 29.3, 27.6, 27.0, 26.3, 19.3, 15.7, 15.0, 13.7; IR (CHCl<sub>3</sub>) ν<sub>max</sub> 2933, 2873, 2727, 1712, 1603, 1583, 1450, 1381, 1313, 1277, 1176, 1115, 1070, 1026, 980, 756 cm<sup>-1</sup>; FAB HRMS [M+Na]<sup>+</sup> calcd for C<sub>24</sub>H<sub>32</sub>O<sub>3</sub>Na: 391.2249, found: 391.2252; [α]<sub>D</sub><sup>25</sup> +105.9 (*c* 0.60, CHCl<sub>3</sub>).

**(+)-Benzoic acid (1*S*,4*S*,4*aS*,5*S*,6*R*,7*R*,8*aR*)-5-[(1*E*,3*E*)-4-ethoxycarbonyl-but-1,3-dienyl]-4,7-dimethyl-6-[(*E*)-1-methyl-propenyl]-decahydro-naphthalen-1-yl ester (10a)**

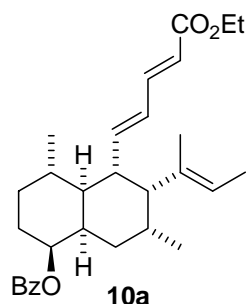

To a stirred solution of phosphonate **11** (0.0430 g, 0.172 mmol) in THF (0.3 mL) was added a solution of LiHMDS in THF (0.126 mL, 1.07 M) dropwise at  $-78\text{ }^{\circ}\text{C}$ , and the reaction mixture was stirred at the same temperature. After 30 min, to the reaction mixture was added a solution of aldehyde **10** (0.0198 g, 0.0537 mmol) in THF (1 mL) at  $-78\text{ }^{\circ}\text{C}$ . The reaction mixture was stirred at the same temperature for 2 h, and then, warmed to  $0\text{ }^{\circ}\text{C}$  and stirred for 2 h. The reaction was quenched with saturated aqueous  $\text{NH}_4\text{Cl}$  solution (1.5 mL), and the aqueous layer was extracted with  $\text{Et}_2\text{O}$  (3 mL  $\times$  3). The combined organic layer was washed with brine (3 mL), dried over  $\text{Na}_2\text{SO}_4$ , and evaporated. The residue was purified by flash chromatography (hexane/ethyl acetate = 20/1) to afford a mixture of ester **10a** containing aldehyde **10**. This mixture was subjected to the reaction described above under the same conditions to afford ester **10a** (0.0228 g, 91%) as a colorless oil:

$R_f = 0.60$  (hexane/ethyl acetate = 4/1);  $^1\text{H NMR}$  (400 MHz,  $\text{CDCl}_3$ )  $\delta$  8.05-7.99 (2H, m), 7.59-7.51 (1H, m), 7.48-7.41 (2H, m), 7.27 (1H, dd,  $J=15.4, 10.7$  Hz), 6.61-6.42 (1H, m), 6.19 (1H, dd,  $J=15.6, 10.7$  Hz), 5.80 (1H, d,  $J=15.4$  Hz), 5.31 (1H, q,  $J=6.1$  Hz), 5.14-5.05 (1H, m), 4.20 (2H, q,  $J=7.1$  Hz), 3.00-2.93 (1H, m), 2.49-2.27 (3H, m), 2.01-1.69 (5H, m), 1.68-1.59 (7H, m), 1.56-1.48 (1H, m), 1.29 (3H, t,  $J=7.1$  Hz), 1.25-1.16 (1H, m), 0.95 (3H, d,  $J=6.3$  Hz), 0.91 (3H, d,  $J=7.1$  Hz);  $^{13}\text{C NMR}$  (100 MHz,  $\text{CDCl}_3$ )  $\delta$  167.3, 165.8, 149.6, 145.5, 136.1, 132.7, 130.9, 129.5, 128.3, 127.1, 119.0, 75.8, 65.5, 60.1, 49.6, 44.5, 39.9, 33.7, 30.6, 29.5, 27.4, 26.2, 19.5, 19.2, 16.4, 16.0, 14.3, 13.7; IR ( $\text{CHCl}_3$ )  $\nu_{\text{max}}$  2931, 2873, 1716, 1633, 1450, 1381, 1367, 1267, 1176, 1132, 1115, 1070, 1026, 1003, 978, 756  $\text{cm}^{-1}$ ; FAB HRMS  $[\text{M}+\text{H}]^+$  calcd for  $\text{C}_{30}\text{H}_{41}\text{O}_4$ : 465.3005, found: 465.3006;  $[\alpha]_D^{23} +134.2$  ( $c$  0.70,  $\text{CHCl}_3$ ).

**(+)-(2E,4E)-5-[(1S,2R,3R,4aR,5S,8S,8aS)-5-Hydroxy-3,8-dimethyl-2-[(E)-1-methyl-propenyl]-decahydro-naphthalen-1-yl]-penta-2,4-dienoic acid (12)**

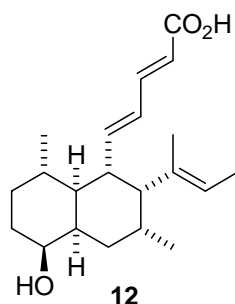

To a stirred solution of ester **10a** (0.0265 g, 0.0570 mmol) in a mixed solvent (EtOH/H<sub>2</sub>O = 10/1, 1.1 mL) was added LiOH·H<sub>2</sub>O (0.0266 g, 0.634 mmol), and the reaction mixture was stirred at room temperature for 1 day. The reaction was quenched with saturated aqueous NH<sub>4</sub>Cl solution (3 mL), and the aqueous layer was extracted with EtOAc (5 mL × 3). The combined organic layer was washed with brine (3 mL), dried over Na<sub>2</sub>SO<sub>4</sub>, and evaporated. The residue was purified by recrystallization (CH<sub>2</sub>Cl<sub>2</sub>/hexane) to afford hydroxycarboxylic acid **12** (0.0170 g, 89%) as a white solid:

R<sub>f</sub> = 0.27 (hexane/ethyl acetate = 1/1); mp 169-173 °C; <sup>1</sup>H NMR (600 MHz, CD<sub>3</sub>OD) δ 7.14 (1H, dd, *J*=15.4, 10.8 Hz), 6.55-6.42 (1H, m), 6.15 (1H, dd, *J*=15.1, 10.8 Hz), 5.69 (1H, d, *J*=15.4 Hz), 5.26 (1H, q, *J*=6.7 Hz), 3.58 (1H, ddd, *J*=11.0, 4.9, 4.9 Hz), 2.92-2.84 (1H, m), 2.35-2.23 (2H, m), 2.17-2.08 (1H, m), 1.78-1.63 (3H, m), 1.61-1.44 (10H, m), 1.36-1.25 (1H, m), 1.05-0.95 (1H, m), 0.88 (3H, d, *J*=7.2 Hz), 0.81 (3H, d, *J*=6.4 Hz); <sup>13</sup>C NMR (150 MHz, CD<sub>3</sub>OD) δ 170.8, 151.6, 147.5, 137.8, 128.4, 120.5, 120.0, 73.8, 51.2, 46.1, 41.5, 35.2, 34.1, 31.0, 30.1, 28.5, 27.5, 19.9, 16.8, 16.2, 13.8; IR (KBr) ν<sub>max</sub> 3386, 2927, 2870, 1691, 1630, 1458, 1415, 1383, 1304, 1259, 1146, 1051, 1001 cm<sup>-1</sup>; FAB HRMS [M+Na]<sup>+</sup> calcd for C<sub>21</sub>H<sub>32</sub>O<sub>3</sub>Na: 355.2249, found: 355.2252; [α]<sub>D</sub><sup>24</sup> +66.9 (*c* 0.43, CH<sub>3</sub>OH).

## Total synthesis of compound 16

### (-)-[(1*S*,2*R*,3*S*,4*aR*,5*S*,8*S*,8*aS*)-1-(*tert*-Butyl-diphenyl-silanyloxymethyl)-3,8-dimethyl-5-triisopropylsilanyloxy-decahydro-naphthalen-2-yl]-methanol (**14**)

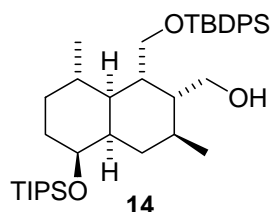

To a stirred solution of [Ir(cod)pyr(PCy<sub>3</sub>)]PF<sub>6</sub> (Crabtree's catalyst) (0.0084 g, 0.0104 mmol) in degassed (CH<sub>2</sub>Cl)<sub>2</sub> (0.4 mL) was added a solution of alcohol **13** (0.0330 g, 0.0520 mmol) in (CH<sub>2</sub>Cl)<sub>2</sub> (2.5 mL) at room temperature, and the mixture was stirred under hydrogen atmosphere at 60 °C for 2 h. After completion of the reaction, to the reaction mixture was added saturated aqueous NH<sub>4</sub>Cl solution (4 mL), and extracted with EtOAc (5 mL × 3). The combined organic layer was washed with brine (3 mL), dried over Na<sub>2</sub>SO<sub>4</sub>, and evaporated. The residue was purified by flash chromatography (hexane/ethyl acetate = 20/1) to afford alcohol **14** (0.0279 g, 84%) as a colorless oil:

R<sub>f</sub> = 0.35 (benzene/ethyl acetate = 100/1, development×2); <sup>1</sup>H NMR (400 MHz, CDCl<sub>3</sub>) δ 7.75-7.66 (4H, m), 7.49-7.33 (6H, m), 4.09 (1H, dd, *J*=10.2, 9.0 Hz), 3.84-3.76 (1H, m), 3.74-3.66 (1H, m), 3.58-3.49 (2H, m), 3.41 (1H, dd, *J*=10.5, 2.7 Hz), 2.25-2.18 (1H, m), 1.76-1.42 (8H, m), 1.17-0.86 (36H, m), 0.77 (3H, d, *J*=6.1 Hz); <sup>13</sup>C NMR (100 MHz, CDCl<sub>3</sub>) δ 135.6, 135.5, 134.8, 133.0, 132.9, 129.9, 129.9, 129.5, 127.9, 127.8, 127.7, 73.6, 67.1, 63.6, 37.7, 42.7, 40.1, 39.7, 34.0, 30.0, 29.5, 28.7, 26.9, 26.7, 26.6, 20.3, 19.3, 19.0, 18.1, 18.1, 17.7, 12.3; IR (CHCl<sub>3</sub>) ν<sub>max</sub> 3460, 2948, 2868, 1464, 1428, 1390, 1245, 1114, 1068, 1056, 1012, 998, 882, 822, 760 cm<sup>-1</sup>; FAB HRMS [M+H]<sup>+</sup> calcd for C<sub>39</sub>H<sub>65</sub>O<sub>3</sub>Si<sub>2</sub>: 637.4472, found: 637.4481; [α]<sub>D</sub><sup>20</sup> -3.0 (*c* 0.52, CHCl<sub>3</sub>).

### (-)-[(1*S*,2*R*,3*S*,4*aR*,5*S*,8*S*,8*aS*)-1-(*tert*-Butyl-diphenyl-silanyloxymethyl)-3,8-dimethyl-5-triisopropylsilanyloxy-decahydro-naphthalene-2-carbaldehyde (**15**)

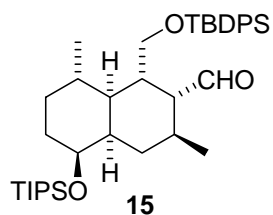

Compound **15** (0.0611 g, 95%), a colorless oil, was prepared from **14** (0.0613 g, 0.0962 mmol) according to the procedure for aldehyde **4** and purified by flash chromatography (hexane/ethyl acetate = 50/1):

$R_f = 0.67$  (hexane/ethyl acetate = 4/1);  $^1\text{H NMR}$  (400 MHz,  $\text{CDCl}_3$ )  $\delta$  9.70 (1H, d,  $J=2.7$  Hz), 7.68-7.59 (4H, m), 7.46-7.34 (6H, m), 3.86 (1H, dd,  $J=10.2, 8.3$  Hz), 3.68-3.60 (1H, m), 3.54 (1H, dd,  $J=10.2, 6.3$  Hz), 2.51-2.41 (1H, m), 2.09 (1H, ddd,  $J=11.7, 3.4, 3.4$  Hz), 1.99-1.84 (2H, m), 1.78 (1H, ddd,  $J=17.3, 3.7, 3.7$  Hz), 1.74-1.49 (4H, m), 1.15-0.98 (33H, m), 0.96 (3H, d,  $J=6.1$  Hz), 0.84 (3H, d,  $J=6.1$  Hz);  $^{13}\text{C NMR}$  (100 MHz,  $\text{CDCl}_3$ )  $\delta$  205.7, 135.6, 133.4, 129.7, 129.7, 127.7, 73.5, 64.1, 54.7, 43.9, 40.8, 38.7, 34.0, 30.0, 28.5, 27.0, 26.9, 26.7, 21.0, 19.3, 19.1, 18.1, 12.4; IR (neat)  $\nu_{\text{max}}$  2944, 2868, 1724, 1464, 1428, 1390, 1245, 1114, 998, 882, 824  $\text{cm}^{-1}$ ; FAB HRMS  $[\text{M}-\text{H}]^+$  calcd for  $\text{C}_{39}\text{H}_{61}\text{O}_3\text{Si}_2$ : 633.4159, found: 633.4141;  $[\alpha]_{\text{D}}^{20} -8.7$  ( $c$  0.54,  $\text{CHCl}_3$ ).

**(+)-(1S,2R,3S,4aR,5S,8S,8aS)-1-(tert-Butyl-diphenyl-silanyloxymethyl)-2-(2,2-dibromo-vinyl)-3,8-dimethyl-5-triisopropylsilanyloxy-decahydro-naphthalene (15a)**

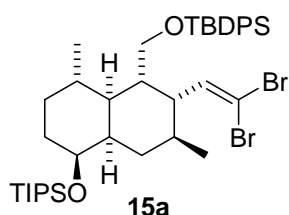

Compound **15a** (0.0581 g, 83%), a colorless oil, was prepared from **15** (0.0564 g, 0.0880 mmol) according to the procedure for dibromide **4b** and purified by flash chromatography (hexane/ethyl acetate = 100/1):

$R_f = 0.64$  (hexane/ethyl acetate = 10/1;  $^1\text{H}$  NMR (400 MHz,  $\text{CDCl}_3$ )  $\delta$  7.71-7.62 (4H, m), 7.47-7.36 (6H, m), 6.18 (1H, d,  $J=9.0$  Hz), 3.78-3.66 (3H, m), 2.29-2.20 (2H, m), 2.10-2.01 (1H, m), 1.80-1.66 (3H, m), 1.64-1.50 (3H, m), 1.49-1.37 (1H, m), 1.13-0.98 (32H, m), 0.91 (3H, d,  $J=6.1$  Hz), 0.81 (3H, d,  $J=6.3$  Hz);  $^{13}\text{C}$  NMR (100 MHz,  $\text{CDCl}_3$ )  $\delta$  142.0, 135.5, 135.4, 133.9, 133.5, 129.6, 129.6, 127.8, 127.7, 87.5, 73.8, 62.6, 46.7, 43.2, 41.7, 38.3, 34.3, 31.7, 30.2, 28.9, 27.2, 26.8, 21.1, 19.7, 19.2, 18.1, 12.4; IR ( $\text{CHCl}_3$ )  $\nu_{\text{max}}$  2929, 2866, 1589, 1462, 1427, 1381, 1242, 1217, 1111, 1068, 1012, 997, 883, 812, 760  $\text{cm}^{-1}$ ; FAB HRMS  $[\text{M}-\text{H}]^+$  calcd for  $\text{C}_{40}\text{H}_{61}\text{Br}_2\text{O}_2\text{Si}_2$ : 787.2577, found: 787.2546;  $[\alpha]_D^{27} +31.6$  (c 0.56,  $\text{CHCl}_3$ ).

**(-)-(1S,2R,3S,4aR,5S,8S,8aS)-1-(tert-Butyl-diphenyl-silanyloxymethyl)-2-ethynyl-3,8-dimethyl-5-triisopropylsilanyloxy-decahydro-naphthalene (15b)**

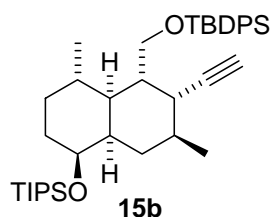

Compound **15b** (0.0439 g, 96%), a colorless oil, was prepared from **15a** (0.0572 g, 0.0723 mmol) according to the procedure for alkyne **6** and purified by flash chromatography (hexane/ethyl acetate = 100/1):

$R_f = 0.41$  (hexane/ethyl acetate = 20/1;  $^1\text{H}$  NMR (400 MHz,  $\text{CDCl}_3$ )  $\delta$  7.72-7.62 (4H, m), 7.44-7.32 (6H, m), 4.13 (1H, dd,  $J=10.2, 3.7$  Hz), 3.85-3.71 (2H, m), 2.32-2.17 (2H, m), 2.14-2.06 (1H, m), 1.90 (1H, d,  $J=2.4$  Hz), 1.78-1.67 (3H, m), 1.67-1.58 (3H, m), 1.38-1.24 (1H, m), 1.10-0.97 (35H, m), 0.90 (3H, d,  $J=6.1$  Hz);  $^{13}\text{C}$  NMR (100 MHz,  $\text{CDCl}_3$ )  $\delta$  135.6, 135.5, 134.2, 134.0, 129.5, 127.6, 127.5, 86.1, 73.8, 70.6, 61.8, 41.6, 41.6, 38.0, 34.8, 34.3, 32.5, 30.2, 28.6, 27.2, 26.8, 21.5, 19.6, 19.3, 18.2, 12.4; IR ( $\text{CHCl}_3$ )  $\nu_{\text{max}}$  3309, 2941, 2866, 1462, 1427, 1383, 1248, 1217, 1113, 1068, 1011, 997, 883, 818, 760, 741  $\text{cm}^{-1}$ ; FAB HRMS  $[\text{M}+\text{H}]^+$  calcd for  $\text{C}_{40}\text{H}_{63}\text{O}_2\text{Si}_2$ : 631.4367, found: 631.4376;  $[\alpha]_D^{26} -4.2$  (c 0.52,  $\text{CHCl}_3$ ).

**(+)-(1*S*,2*R*,3*S*,4*aR*,5*S*,8*S*,8*aS*)-1-(*tert*-Butyl-diphenyl-silanyloxymethyl)-2-[(*E*)-2-iodo-1-methyl-vinyl]-3,8-dimethyl-5-triisopropylsilanyloxy-decahydro-naphthalene (15c)**

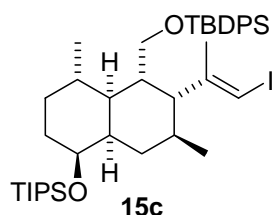

Compound **15c** (0.0393 g, 99%), a colorless oil, was prepared from **15b** (0.0323 g, 0.0512 mmol) according to the procedure for iodoalkene **7** and purified by flash chromatography (hexane/ethyl acetate = 100/1):

$R_f$  = 0.62 (hexane/ethyl acetate = 20/1;  $^1\text{H}$  NMR (400 MHz,  $\text{CDCl}_3$ )  $\delta$  7.68-7.58 (4H, m), 7.46-7.34 (6H, m), 5.66 (1H, s), 3.77 (1H, ddd,  $J=10.5, 5.1, 5.1$  Hz), 3.64 (1H, dd,  $J=10.0, 9.8$  Hz), 3.54 (1H, dd,  $J=10.0, 3.9$  Hz), 2.14-2.00 (3H, m), 1.82-1.62 (5H, m), 1.61 (3H, s), 1.58-1.48 (2H, m), 1.10-1.00 (32H, m), 0.87 (3H, d,  $J=5.4$  Hz), 0.79 (3H, d,  $J=6.1$  Hz);  $^{13}\text{C}$  NMR (100 MHz,  $\text{CDCl}_3$ )  $\delta$  148.3, 135.5, 135.4, 134.1, 133.8, 129.6, 129.5, 127.7, 127.6, 76.6, 73.9, 61.7, 51.5, 42.5, 41.2, 37.9, 34.3, 30.3, 29.7, 29.3, 27.1, 26.9, 25.1, 21.4, 19.5, 19.3, 18.2, 12.4; IR ( $\text{CHCl}_3$ )  $\nu_{\text{max}}$  2941, 2866, 1589, 1462, 1427, 1379, 1257, 1242, 1217, 1113, 1068, 1012, 997, 883, 820, 760  $\text{cm}^{-1}$ ; FAB HRMS  $[\text{M}+\text{H}]^+$  calcd for  $\text{C}_{41}\text{H}_{66}\text{IO}_2\text{Si}_2$ : 773.3646, found: 773.3630;  $[\alpha]_D^{26} +18.2$  ( $c$  0.58,  $\text{CHCl}_3$ ).

**(+)-(1*S*,2*R*,3*S*,4*aR*,5*S*,8*S*,8*aS*)-1-(*tert*-Butyl-diphenyl-silanyloxymethyl)-3,8-dimethyl-2-[(*E*)-1-methyl-propenyl]-5-triisopropylsilanyloxy-decahydro-naphthalene (15d)**

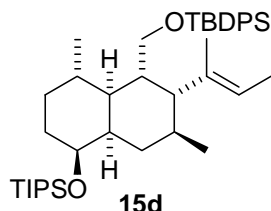



Compound **15d** (0.0307 g, 91%), a colorless oil, was prepared from **15c** (0.0393 g, 0.0508 mmol) according to the procedure for alkene **7a** and purified by flash chromatography (hexane/ethyl acetate = 100/1):

$R_f$  = 0.44 (hexane/ethyl acetate = 30/1);  $^1\text{H}$  NMR (400 MHz,  $\text{CDCl}_3$ )  $\delta$  7.68-7.58 (4H, m), 7.44-7.30 (6H, m), 4.93 (1H, q,  $J=6.6$  Hz), 3.78 (1H, ddd,  $J=10.2, 5.1, 5.1$  Hz), 3.66 (1H, dd,  $J=10.0, 10.0$  Hz), 3.58 (1H, dd,  $J=10.0, 4.4$  Hz), 2.16-2.08 (1H, m), 2.06-1.97 (1H, m), 1.81-1.68 (5H, m), 1.66-1.45 (4H, m), 1.40 (3H, d,  $J=6.6$  Hz), 1.38 (3H, s), 1.10-0.96 (31H, m), 0.89 (3H, d,  $J=4.9$  Hz), 0.77 (3H, d,  $J=6.3$  Hz);  $^{13}\text{C}$  NMR (100 MHz,  $\text{CDCl}_3$ )  $\delta$  135.6, 135.5, 135.4, 134.5, 134.1, 129.4, 127.5, 127.5, 119.6, 74.2, 61.8, 50.0, 42.4, 41.3, 38.0, 34.5, 30.3, 29.4, 29.1, 27.1, 26.8, 21.5, 19.5, 19.3, 18.2, 16.6, 13.1, 12.5; IR ( $\text{CHCl}_3$ )  $\nu_{\text{max}}$  2941, 2866, 1589, 1462, 1427, 1381, 1255, 1217, 1111, 1068, 1012, 997, 883, 822, 760  $\text{cm}^{-1}$ ; FAB HRMS  $[\text{M}+\text{H}]^+$  calcd for  $\text{C}_{42}\text{H}_{69}\text{O}_2\text{Si}_2$ : 661.4836, found: 661.4843;  $[\alpha]_{\text{D}}^{26} +8.0$  ( $c$  0.60,  $\text{CHCl}_3$ ).

**(+)-(1S,4S,4aS,5S,6R,7S,8aR)-5-Hydroxymethyl-4,7-dimethyl-6-[(E)-1-methyl-propenyl]-decahydro-naphthalen-1-ol (15e)**

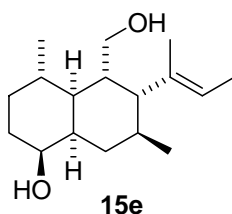

Compound **15e** (0.0154 g, 99%), a white solid, was prepared from **15d** (0.0387 g, 0.0585 mmol) according to the procedure for diol **8** and purified by flash chromatography (hexane/ethyl acetate = 1/2):

$R_f$  = 0.14 (hexane/ethyl acetate = 1/1); mp 174-177  $^{\circ}\text{C}$ ;  $^1\text{H}$  NMR (400 MHz,  $\text{CD}_3\text{OD}$ )  $\delta$  5.11-4.98 (1H, m), 3.63-3.39 (3H, m), 2.12-1.98 (1H, m), 1.97-1.86 (1H, m), 1.85-1.39 (15H, m), 1.14-0.90 (3H, m), 0.85-0.72 (6H, m);  $^{13}\text{C}$  NMR (100 MHz,  $\text{CD}_3\text{OD}$ )  $\delta$  137.1, 121.1, 74.0, 60.9, 51.3, 43.5, 42.2, 38.2, 35.4, 30.4, 30.1, 28.4, 21.9, 19.7, 17.1, 13.4; IR (KBr)  $\nu_{\text{max}}$  3365, 2925, 2866, 1633, 1456, 1408, 1375, 1286,

1223, 1099, 1063, 1034, 957  $\text{cm}^{-1}$ ; FAB HRMS  $[\text{M}+\text{H}]^+$  calcd for  $\text{C}_{17}\text{H}_{31}\text{O}_2$ : 267.2324, found: 267.2324;  $[\alpha]_{\text{D}}^{27} +61.0$  ( $c$  0.54,  $\text{CH}_3\text{OH}$ ).

**(+)-(1*S*,4*S*,4*aS*,5*S*,6*R*,7*S*,8*aR*)-5-(*tert*-Butyl-dimethyl-silyloxy)methyl)-4,7-dimethyl-6-[(*E*)-1-methyl-propenyl]-decahydro-naphthalen-1-ol (15f)**

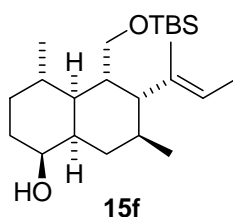

Compound **15f** (0.0214 g, 85%), a colorless oil, was prepared from **15e** (0.0176 g, 0.0660 mmol) according to the procedure for TBS ether **8a** and purified by flash chromatography (hexane/ethyl acetate = 10/1):

$R_f = 0.79$  (hexane/ethyl acetate = 1/1);  $^1\text{H}$  NMR (400 MHz,  $\text{CDCl}_3$ )  $\delta$  5.10 (1H, q,  $J=6.6$  Hz), 3.70 (1H, ddd,  $J=11.7, 4.9, 4.9$  Hz), 3.61-3.53 (2H, m), 2.16-2.08 (1H, m), 1.96-1.89 (1H, m), 1.85-1.78 (1H, m), 1.78-1.47 (14H, m), 1.18-0.98 (2H, m), 0.91-0.86 (9H, m), 0.85 (3H, d,  $J=6.1$  Hz), 0.83 (3H, d,  $J=5.9$  Hz), 0.04-0.00 (6H, m);  $^{13}\text{C}$  NMR (100 MHz,  $\text{CDCl}_3$ )  $\delta$  135.8, 120.0, 73.4, 60.9, 50.0, 42.1, 41.3, 37.0, 34.2, 29.7, 29.1, 29.0, 27.0, 26.0, 21.4, 19.3, 18.2, 16.7, 13.3, -5.3, -5.4; IR ( $\text{CHCl}_3$ )  $\nu_{\text{max}}$  3311, 2929, 2858, 1462, 1377, 1362, 1255, 1215, 1088, 1045, 1007, 835, 773, 760  $\text{cm}^{-1}$ ; FAB HRMS  $[\text{M}+\text{H}]^+$  calcd for  $\text{C}_{23}\text{H}_{45}\text{O}_2\text{Si}$ : 381.3189, found: 381.3191;  $[\alpha]_{\text{D}}^{27} +58.1$  ( $c$  0.51,  $\text{CHCl}_3$ ).

**(+)-Benzoic acid (1*S*,4*S*,4*aS*,5*S*,6*R*,7*S*,8*aR*)-5-(*tert*-butyl-dimethyl-silyloxy)methyl)-4,7-dimethyl-6-[(*E*)-1-methyl-propenyl]-decahydro-naphthalen-1-yl ester (15g)**

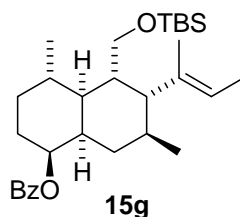

Compound **15g** (0.0211 g, 100%), a colorless oil, was prepared from **15f** (0.0166 g, 0.0436 mmol) according to the procedure for benzoate **9** and purified by flash chromatography (hexane/ethyl acetate = 8/1):

$R_f = 0.77$  (hexane/ethyl acetate = 4/1);  $^1\text{H NMR}$  (400 MHz,  $\text{CDCl}_3$ )  $\delta$  8.07 -8.02 (2H, m), 7.57 -7.51 (1H, m), 7.46-7.40 (2H, m), 5.14-5.00 (2H, m), 3.59 -3.50 (2H, m), 2.39 -2.30 (1H, m), 1.98-1.90 (1H, m), 1.89-1.73 (8H, m), 1.60 (3H, d,  $J=7.1$  Hz), 1.58 (3H, s), 1.38-1.28 (1H, m), 1.24-1.14 (1H, m), 0.91-0.85 (12H, m), 0.84 (3H, d,  $J=6.1$  Hz), 0.08- -0.00 (6H, m);  $^{13}\text{C NMR}$  (100 MHz,  $\text{CDCl}_3$ )  $\delta$  166.1, 136.1, 132.9, 131.4, 129.8, 128.6, 120.4, 76.7, 61.3, 50.2, 42.5, 41.7, 34.9, 34.2, 30.5, 30.0, 29.2, 27.5, 26.6, 26.3, 21.8, 19.7, 18.5, 17.0, 13.6, -5.0, -5.0; IR ( $\text{CHCl}_3$ )  $\nu_{\text{max}}$  2927, 2856, 1716, 1603, 1585, 1452, 1379, 1362, 1315, 1277, 1176, 1115, 1090, 1026, 1007, 984, 939, 835, 760  $\text{cm}^{-1}$ ; FAB HRMS  $[\text{M}+\text{H}]^+$  calcd for  $\text{C}_{30}\text{H}_{49}\text{O}_3\text{Si}$ : 485.3451, found: 485.3434;  $[\alpha]_{\text{D}}^{26} +59.3$  ( $c$  0.68,  $\text{CHCl}_3$ ).

**(+)-Benzoic acid (1S,4S,4aS,5S,6R,7S,8aR)-5-hydroxymethyl-4,7-dimethyl-6-[(E)-1-methylpropenyl]-decahydro-naphthalen-1-yl ester (15h)**

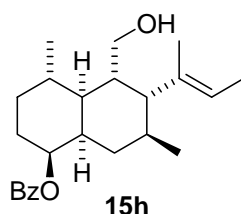

Compound **15h** (0.0161 g, 100%), a colorless oil, was prepared from **15g** (0.0216g, 0.0435 mmol) according to the procedure for alcohol **9a** and purified by flash chromatography (hexane/ethyl acetate = 4/1):

$R_f = 0.24$  (hexane/ethyl acetate = 4/1);  $^1\text{H NMR}$  (400 MHz,  $\text{CDCl}_3$ )  $\delta$  8.11-8.00 (2H, m), 7.61-7.52 (1H, m), 7.51-7.40 (2H, m), 5.21 (1H, q,  $J=6.3$  Hz), 5.06 (1H, ddd,  $J=11.0, 5.1, 5.1$  Hz), 3.81 (1H, dd,  $J=11.0, 6.1$  Hz), 3.48 (1H, dd,  $J=11.0, 7.1$  Hz), 2.29-2.18 (1H, m), 2.13-2.04 (1H, m), 1.91-1.57 (14H, m), 1.56-1.47 (1H, m), 1.42-1.28 (1H, m), 1.24-1.13 (1H, m), 0.93 (3H, d,  $J=6.1$  Hz), 0.88 (3H, d,  $J=5.9$  Hz);  $^{13}\text{C NMR}$  (100 MHz,  $\text{CDCl}_3$ )  $\delta$  165.3, 137.0, 132.7, 130.8, 129.5, 128.3, 119.4, 76.1, 63.2, 49.3,

44.7, 41.3, 35.1, 33.6, 29.9, 28.5, 27.1, 26.2, 21.1, 19.2, 17.4, 13.4; IR (CHCl<sub>3</sub>)  $\nu_{\max}$  3444, 2927, 2871, 1714, 1623, 1585, 1450, 1379, 1317, 1279, 1217, 1176, 1119, 1070, 1026, 982, 935, 758 cm<sup>-1</sup>; FAB HRMS [M+H]<sup>+</sup> calcd for C<sub>24</sub>H<sub>35</sub>O<sub>3</sub>: 371.2586, found: 371.2588; [ $\alpha$ ]<sub>D</sub><sup>31</sup> +55.9 (*c* 0.79, CHCl<sub>3</sub>).

**(+)-Benzoic acid (1*S*,4*S*,4*aR*,5*S*,6*R*,7*S*,8*aR*)-5-formyl-4,7-dimethyl-6-[(*E*)-1-methyl-propenyl]-decahydro-naphthalen-1-yl ester (15*i*)**

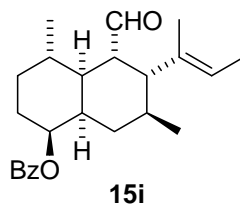

Compound **15i** (0.0151 g, 91%), a colorless oil, was prepared from **15h** (0.0167 g, 0.0451 mmol) according to the procedure for aldehyde **10** and purified by flash chromatography (hexane/ethyl acetate = 20/1):

$R_f$  = 0.56 (hexane/ethyl acetate = 4/1); <sup>1</sup>H NMR (400 MHz, CDCl<sub>3</sub>)  $\delta$  9.94 (1H, d, *J*=2.0 Hz), 8.10-7.99 (2H, m), 7.59-7.52 (1H, m), 7.49-7.40 (2H, m), 5.34 (1H, q, *J*=6.1 Hz), 5.06 (1H, ddd, *J*=11.7, 4.9, 4.9 Hz), 2.61-2.54 (1H, m), 2.37-2.26 (1H, m), 2.06-1.69 (8H, m), 1.68-1.58 (6H, m), 1.47-1.34 (1H, m), 1.32-1.16 (1H, m), 0.95 (3H, d, *J*=5.9 Hz), 0.91 (3H, d, *J*=5.4 Hz); <sup>13</sup>C NMR (100 MHz, CDCl<sub>3</sub>)  $\delta$  206.9, 165.7, 134.2, 132.7, 130.8, 129.5, 128.3, 121.7, 75.3, 51.4, 49.1, 43.6, 36.7, 33.3, 30.6, 29.9, 27.0, 26.1, 20.7, 19.1, 16.6, 13.4; IR (CHCl<sub>3</sub>)  $\nu_{\max}$  2929, 2871, 2742, 1716, 1603, 1583, 1450, 1381, 1315, 1277, 1176, 1115, 1070, 1026, 984, 758 cm<sup>-1</sup>; FAB HRMS [M+H]<sup>+</sup> calcd for C<sub>24</sub>H<sub>33</sub>O<sub>3</sub>: 369.2430, found: 369.2433; [ $\alpha$ ]<sub>D</sub><sup>27</sup> +118.7 (*c* 0.67, CHCl<sub>3</sub>).

**(+)-Benzoic acid (1*S*,4*S*,4*aS*,5*S*,6*R*,7*S*,8*aR*)-5-[(1*E*,3*E*)-4-ethoxycarbonyl-but-1,3-dienyl]-4,7-dimethyl-6-[(*E*)-1-methyl-propenyl]-decahydro-naphthalen-1-yl ester (15*j*)**

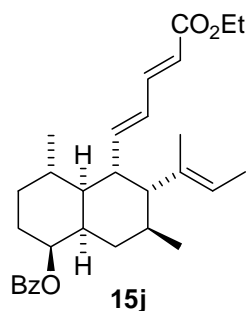

Compound **15j** (0.0186 g, 98%), a colorless oil, was prepared from **15i** (0.0151 g, 0.0410 mmol) according to the procedure for ester **10a** and purified by flash chromatography (hexane/ethyl acetate = 20/1). Aldehyde **15i** did not remain in the reaction with phosphonate **11**, thus, all the starting material was consumed in one reaction in contrast with the reaction of aldehyde **10**:

$R_f = 0.56$  (hexane/ethyl acetate = 4/1);  $^1\text{H NMR}$  (400 MHz,  $\text{CDCl}_3$ )  $\delta$  8.14-8.01 (2H, m), 7.63-7.52 (1H, m), 7.51-7.40 (2H, m), 7.24 (1H, dd,  $J=15.4, 11.0$  Hz), 6.44 (1H, dd,  $J=15.1, 9.3$  Hz), 6.07 (1H, dd,  $J=15.1, 11.0$  Hz), 5.77 (1H, d,  $J=15.4$  Hz), 5.15 (1H, q,  $J=6.6$  Hz), 5.00 (1H, ddd,  $J=11.0, 5.1, 5.1$  Hz), 4.26-4.13 (2H, m), 2.67-2.56 (1H, m), 2.48-2.32 (1H, m), 1.96-1.72 (6H, m), 1.69-1.60 (1H, m), 1.55 (3H, d,  $J=6.6$  Hz), 1.45 (3H, s), 1.40-1.11 (6H, m), 0.95 (3H, d,  $J=6.3$  Hz), 0.85 (3H, d,  $J=5.9$  Hz);  $^{13}\text{C NMR}$  (100 MHz,  $\text{CDCl}_3$ )  $\delta$  167.3, 165.8, 146.4, 145.1, 136.3, 132.8, 130.8, 129.5, 128.6, 128.3, 120.6, 119.4, 75.9, 60.1, 51.4, 49.5, 45.0, 35.4, 33.5, 30.1, 28.7, 27.6, 26.2, 20.8, 19.2, 15.5, 14.3, 13.2; IR ( $\text{CHCl}_3$ )  $\nu_{\text{max}}$  2927, 2871, 1712, 1637, 1450, 1369, 1277, 1176, 1157, 1134, 1115, 1070, 1026, 1001, 984, 758  $\text{cm}^{-1}$ ; FAB HRMS  $[\text{M}+\text{H}]^+$  calcd for  $\text{C}_{30}\text{H}_{41}\text{O}_4$ : 465.3005, found: 465.2997;  $[\alpha]_{\text{D}}^{26} +246.6$  ( $c$  0.50,  $\text{CHCl}_3$ ).

**(+)-(2E,4E)-5-[(1S,2R,3S,4aR,5S,8S,8aS)--5-Hydroxy-3,8-dimethyl-2-[(E)-1-methyl-propenyl]-decahydro-naphthalen-1-yl]-penta-2,4-dienoic acid (16)**

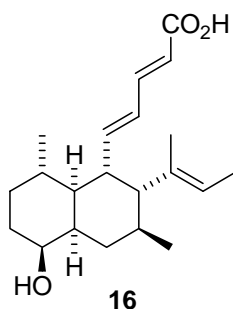

Compound **16** (0.0125 g, 94%), a colorless oil, was prepared from **15j** (0.0186 g, 0.0400 mmol) according to the procedure for hydroxycarboxylic acid **12** and purified by flash chromatography (hexane/ethyl acetate = 1/1);

$R_f = 0.14$  (hexane/ethyl acetate = 1/1);  $^1\text{H NMR}$  (600 MHz,  $\text{CD}_3\text{OD}$ )  $\delta$  7.23 (1H, dd,  $J=15.1, 11.0$  Hz), 6.54 (1H, dd,  $J=14.8, 9.5$  Hz), 6.09 (1H, dd,  $J=14.8, 11.0$  Hz), 5.76 (1H, d,  $J=15.1$  Hz), 5.18 (1H, q,  $J=6.7$  Hz), 3.58 (1H, ddd,  $J=10.2, 5.1, 5.1$  Hz), 2.68-2.58 (1H, m), 2.19-2.12 (1H, m), 1.96-1.69 (6H, m), 1.67-1.53 (5H, m), 1.49 (3H, s), 1.30-1.04 (2H, m), 0.91 (3H, d,  $J=6.4$  Hz), 0.84 (3H, d,  $J=6.1$  Hz);  $^{13}\text{C NMR}$  (150 MHz,  $\text{CD}_3\text{OD}$ )  $\delta$  170.9, 148.5, 147.0, 137.8, 129.8, 121.5, 120.5, 73.8, 53.1, 51.5, 46.5, 39.3, 35.1, 30.4, 30.2, 30.0, 28.8, 21.3, 19.7, 15.9, 13.3; IR ( $\text{CHCl}_3$ )  $\nu_{\text{max}}$  3384, 2927, 2870, 1687, 1633, 1456, 1417, 1377, 1304, 1265, 1238, 1157, 1045, 1001, 758  $\text{cm}^{-1}$ ; FAB HRMS  $[\text{M}+\text{H}]^+$  calcd for  $\text{C}_{21}\text{H}_{33}\text{O}_3$ : 333.2430, found: 333.2435;  $[\alpha]_{\text{D}}^{25} +157.4$  ( $c$  0.70,  $\text{CHCl}_3$ ).

## Total synthesis of NH006

### 3-[(1*S*,2*R*,3*S*,4*aR*,5*S*,8*S*,8*aS*)-1-(*tert*-Butyl-diphenyl-silyloxymethyl)-3,8-dimethyl-5-triisopropylsilyloxy-decahydro-naphthalen-2-yl]-3-hydroxy-propionic acid methyl ester (**15k**)

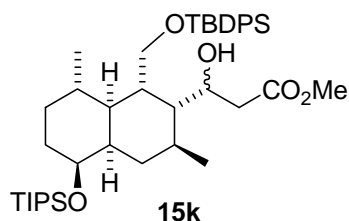

To a stirred solution of *i*-Pr<sub>2</sub>NH (0.0365 mL, 0.260 mmol) in THF (0.5 mL) was added *n*-BuLi in hexane (0.1439 mL, 1.63 M) at 0 °C. After 10 min, the reaction mixture was cooled to -78 °C, and to which was added MeOAc (0.0207 mL, 0.261 mmol). After 10 min, to the reaction mixture was added a solution of aldehyde **15** (0.0331 g, 0.0521 mmol) in THF (1.2 mL) at -78 °C, and the resulting mixture was stirred at the same temperature for 1 h. The reaction was quenched with saturated aqueous NH<sub>4</sub>Cl solution (2 mL), and the aqueous layer was extracted with Et<sub>2</sub>O (4 mL × 3). The combined organic layer was washed with brine (3 mL), dried over Na<sub>2</sub>SO<sub>4</sub>, and evaporated. The residue was purified by flash chromatography (hexane/ethyl acetate = 10/1) to afford hydroxyester **15k**, which was immediately used for the next reaction:

R<sub>f</sub> = 0.40 (hexane/ethyl acetate = 1/1).

### (-)-3-[(1*S*,2*R*,3*S*,4*aR*,5*S*,8*S*,8*aS*)-1-(*tert*-Butyl-diphenyl-silyloxymethyl)-3,8-dimethyl-5-triisopropylsilyloxy-decahydro-naphthalen-2-yl]-3-oxo-propionic acid methyl ester (**15l**)

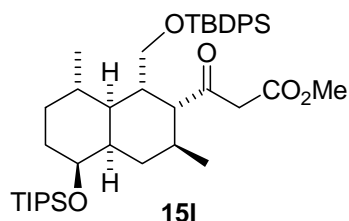

To a stirred solution of hydroxyester **15k** obtained as above in CH<sub>2</sub>Cl<sub>2</sub> (2 mL) was added Dess-Martin periodinane (0.0436 g, 0.103 mmol), and the mixture was stirred at room temperature for 1 h. The

reaction mixture was diluted with Et<sub>2</sub>O (2 mL), and to the solution was added saturated aqueous NaHCO<sub>3</sub> solution (2 mL) and saturated aqueous Na<sub>2</sub>S<sub>2</sub>O<sub>3</sub> solution (4 mL), and the aqueous layer was extracted with Et<sub>2</sub>O (6 mL × 3). The combined organic layer was washed with brine (5 mL), dried over Na<sub>2</sub>SO<sub>4</sub>, and evaporated. The residue was purified by flash chromatography (hexane/ethyl acetate = 30/1) to afford ketoester **15I** (0.0310 g, 84% (2 steps)) as a colorless oil:

R<sub>f</sub> = 0.27 (hexane/ethyl acetate = 10/1); <sup>1</sup>H NMR (400 MHz, CDCl<sub>3</sub>) δ 7.66-7.57 (4H, m), 7.46-7.31 (6H, m), 3.73-3.67 (1H, m), 3.66 (3H, s), 3.60 (1H, dd, *J*=10.5, 8.3 Hz), 3.48 (1H, dd, *J*=10.5, 5.6 Hz), 3.36 (1H, d, *J*=14.9 Hz), 3.17 (1H, d, *J*=14.9 Hz), 2.51 (1H, dd, *J*=11.5, 4.1 Hz), 2.35-2.24 (1H, m), 1.96-1.49 (8H, m), 1.12-0.95 (32H, m), 0.92 (3H, d, *J*=5.9 Hz), 0.83 (3H, d, *J*=6.1 Hz); <sup>13</sup>C NMR (100 MHz, CDCl<sub>3</sub>) δ 204.3, 167.7, 135.5, 135.4, 133.5, 133.5, 129.7, 129.6, 127.7, 73.5, 62.5, 54.3, 52.1, 48.4, 43.2, 39.5, 37.8, 34.0, 30.0, 27.9, 27.6, 26.9, 26.8, 21.0, 19.4, 19.2, 18.1, 18.1, 12.3; IR (neat) ν<sub>max</sub> 2944, 2868, 1750, 1714, 1654, 1622, 1464, 1428, 1376, 1324, 1290, 1242, 1112, 1086, 1014, 998, 882, 822, 760, 742 cm<sup>-1</sup>; FAB HRMS [M+H]<sup>+</sup> calcd for C<sub>42</sub>H<sub>67</sub>O<sub>5</sub>Si<sub>2</sub>: 707.4534, found: 707.4527; [α]<sub>D</sub><sup>18</sup> – 29.2 (*c* 0.50, CHCl<sub>3</sub>).

**(+)-(E)-3-[(1S,2R,3S,4aR,5S,8S,8aS)-1-(*tert*-Butyl-diphenyl-silanyloxymethyl)-3,8-dimethyl-5-triisopropylsilanyloxy-decahydro-naphthalen-2-yl]-3-(diphenoxy-phosphoryloxy)-acrylic acid methyl ester (17)**

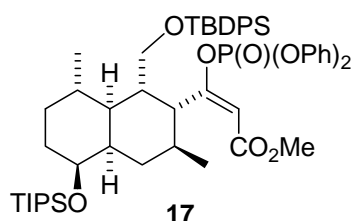

To a stirred solution of ketoester **15I** (0.0310 g, 0.0438 mmol) in HMPA (1.5 mL) was added Et<sub>3</sub>N (0.0611 mL, 0.438 mmol) at 0 °C, and stirring was continued at the same temperature. After 2 h, to the reaction mixture was added ClP(O)(OPh)<sub>2</sub> (0.0907 mL, 0.260 mmol) and DMAP (0.0005 g, 0.00409 mmol) successively at 0 °C, and the reaction mixture was stirred at room temperature for 1 h. The



reaction was quenched with saturated aqueous  $\text{NH}_4\text{Cl}$  solution (3 mL), and the aqueous layer was extracted with  $\text{Et}_2\text{O}$  (6 mL  $\times$  3). The combined organic layer was washed with brine (3 mL), dried over  $\text{Na}_2\text{SO}_4$ , and evaporated. The residue was purified by flash chromatography (hexane/ethyl acetate = 10/1) to afford enol phosphonate **17** (0.0403 g, 98%):

$R_f = 0.51$  (hexane/ethyl acetate = 4/1);  $^1\text{H}$  NMR (400 MHz,  $\text{CDCl}_3$ )  $\delta$  7.65-7.54 (4H, m), 7.44-7.26 (6H, m), 7.23-7.16 (2H, m), 7.16-7.05 (4H, m), 7.01-6.94 (2H, m), 6.91-6.84 (2H, m), 5.90 (1H, s), 3.77-3.55 (6H, m), 2.26-2.17 (1H, m), 1.97-1.88 (1H, m), 1.86-1.69 (3H, m), 1.64-1.51 (3H, m), 1.15-0.97 (34H, m), 0.94 (3H, d,  $J=5.4$  Hz), 0.65 (3H, d,  $J=5.9$  Hz);  $^{13}\text{C}$  NMR (100 MHz,  $\text{CDCl}_3$ )  $\delta$  168.9, 168.8, 165.9, 150.0, 150.0, 135.6, 135.5, 134.1, 133.8, 129.8, 129.7, 129.6, 129.5, 127.7, 127.6, 125.8, 125.7, 120.1, 120.1, 120.0, 120.0, 105.4, 105.4, 73.9, 61.4, 51.4, 43.3, 43.2, 42.4, 41.5, 37.7, 34.5, 30.2, 28.5, 28.1, 27.0, 26.8, 21.0, 19.7, 19.3, 18.2, 12.4; IR ( $\text{CHCl}_3$ )  $\nu_{\text{max}}$  2940, 2868, 1724, 1640, 1592, 1490, 1462, 1428, 1380, 1300, 1236, 1214, 1188, 1162, 1132, 1112, 1084, 1044, 1026, 1010, 970, 944, 882, 860, 822, 756  $\text{cm}^{-1}$ ; FAB HRMS  $[\text{M}+\text{Na}]^+$  calcd for  $\text{C}_{54}\text{H}_{75}\text{O}_8\text{PSi}_2\text{Na}$ : 961.4636, found: 961.4654;  $[\alpha]_D^{19} +51.4$  ( $c$  0.50,  $\text{CHCl}_3$ ).

**(+)-(Z)-3-[(1S,2R,3S,4aR,5S,8S,8aS)-1-(*tert*-Butyl-diphenyl-silanyloxymethyl)-3,8-dimethyl-5-triisopropylsilanyloxy-decahydro-naphthalen-2-yl]-but-2-enoic acid methyl ester (18)**

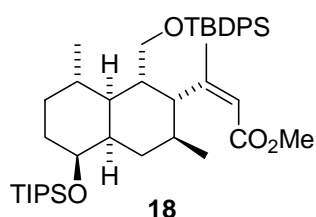

To a stirred solution of  $\text{MeMgCl}$  in THF (2.37 mL, 3.0 M) was added a solution of the enol phosphonate **17** (0.111 g, 0.118 mmol) and  $\text{Fe}(\text{acac})_3$  (0.208 g, 0.591 mmol) in NMP (4 mL) dropwise at 0 °C, and the reaction mixture was stirred at 0 °C for 1h. The reaction was quenched with saturated aqueous  $\text{NH}_4\text{Cl}$  (7 mL) and the aqueous layer was extracted with  $\text{Et}_2\text{O}$  (10 mL $\times$ 3). The combined organic layer was washed with brine (3 mL), dried over  $\text{MgSO}_4$ , filtered, and evaporated. The residue

was purified by silica gel chromatography (hexane/ethyl acetate=50/1) to give the ester **18** (0.0763 g, 91%) as a colorless oil:

$R_f = 0.58$  (hexane/ethyl acetate = 10/1);  $^1\text{H NMR}$  (400 MHz,  $\text{CDCl}_3$ )  $\delta$  7.68-7.57 (4H, m), 7.45-7.30 (6H, m), 5.60 (1H, s), 3.78-3.59 (6H, m), 2.21-2.14 (1H, m), 2.06-1.97 (1H, m), 1.89-1.71 (2H, m), 1.65 (3H, s), 1.63-1.53 (4H, m), 1.19-1.10 (34H, m), 0.96 (3H, d,  $J=6.1$  Hz), 0.76 (3H, d,  $J=6.1$  Hz);  $^{13}\text{C NMR}$  (100 MHz,  $\text{CDCl}_3$ )  $\delta$  166.1, 163.8, 135.5, 135.5, 134.4, 134.0, 133.8, 129.5, 127.6, 127.5, 118.2, 74.0, 63.2, 50.7, 44.1, 43.5, 43.3, 38.5, 34.5, 30.2, 29.2, 29.0, 27.0, 26.7, 22.6, 21.8, 20.0, 19.2, 18.2, 12.4; IR ( $\text{CHCl}_3$ )  $\nu_{\text{max}}$  2944, 2868, 1718, 1632, 1592, 1464, 1430, 1380, 1220, 1192, 1150, 1114, 1092, 1014, 998, 952, 918, 882, 866, 822, 758  $\text{cm}^{-1}$ ; FAB HRMS  $[\text{M}+\text{Na}]^+$  calcd for  $\text{C}_{43}\text{H}_{68}\text{O}_4\text{Si}_2\text{Na}$ : 727.4554, found: 727.4544;  $[\alpha]_{\text{D}}^{19} +89.8$  ( $c$  0.47,  $\text{CHCl}_3$ ).

**(+)-(Z)-3-[(1S,2R,3S,4aR,5S,8S,8aS)-1-(tert-Butyl-diphenyl-silyloxyethyl)-3,8-dimethyl-5-triisopropylsilyloxy-decahydro-naphthalen-2-yl]-but-2-en-1-ol (18a)**

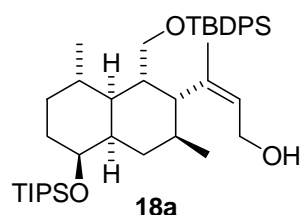

To a stirred solution of the ester **18** (0.0763 g, 0.108 mmol) in  $\text{CH}_2\text{Cl}_2$  (3 mL) was added DIBAL in hexane (0.414 mL, 0.98 M) at  $-78$  °C and the reaction mixture was stirred at the same temperature for 30 min. To the reaction mixture was added MeOH at  $-78$  °C until no gas evolution was observed, and the mixture was warmed up to room temperature. To the mixture was added saturated aqueous Rochelle salt (9 mL), and the resultant mixture was stirred at room temperature for 30 min. The aqueous layer was extracted with  $\text{CH}_2\text{Cl}_2$  (10 mL $\times$ 3). The combined organic layer was dried over  $\text{Na}_2\text{SO}_4$ , filtered, and evaporated. The residue was purified by flash chromatography (hexane/ethyl acetate=10/1) to give the alcohol **18a** (0.0720 g, 98%) as a colorless oil:

$R_f = 0.17$  (hexane/ethyl acetate = 10/1);  $^1\text{H NMR}$  (400 MHz,  $\text{CDCl}_3$ )  $\delta$  7.67-7.56 (4H, m), 7.46-7.30 (6H, m), 5.36-5.28 (1H, m), 4.22-4.12 (1H, m), 4.04-3.95 (1H, m), 3.80-3.68 (2H, m), 3.64 (1H, dd,  $J=9.5, 5.1$  Hz), 2.39-2.30 (1H, m), 2.11-2.02 (1H, m), 1.92-1.66 (4H, m), 1.66-1.50 (4H, m), 1.47 (3H, s), 1.16-0.96 (32H, m), 0.87 (3H, d,  $J=5.1$  Hz), 0.76 (3H, d,  $J=6.1$  Hz);  $^{13}\text{C NMR}$  (100 MHz,  $\text{CDCl}_3$ )  $\delta$  141.8, 135.5, 135.4, 134.1, 133.9, 129.5, 129.5, 127.6, 127.5, 127.0, 73.9, 62.2, 58.5, 44.8, 42.5, 37.9, 34.5, 30.2, 29.0, 28.9, 27.1, 26.8, 22.0, 21.4, 19.9, 19.2, 18.2, 12.4 ; IR ( $\text{CHCl}_3$ )  $\nu_{\text{max}}$  3372, 2940, 2868, 1717, 1639, 1550, 1464, 1428, 1384, 1256, 1218, 1112, 1092, 1008, 882, 820, 760  $\text{cm}^{-1}$ ; FAB HRMS  $[\text{M}+\text{Na}]^+$  calcd for  $\text{C}_{42}\text{H}_{68}\text{O}_3\text{Si}_2\text{Na}$ : 699.4605, found: 699.4576;  $[\alpha]_{\text{D}}^{21} +41.6$  ( $c$  0.52,  $\text{CHCl}_3$ ).

**(1*S*,2*R*,3*S*,4*aR*,5*S*,8*S*,8*aS*)-2-[(*Z*)-3-Bromo-1-methyl-propenyl]-1-(*tert*-butyl-diphenyl-silyloxy)methyl)-3,8-dimethyl-5-triisopropylsilyloxy-decahydro-naphthalene (18b)**

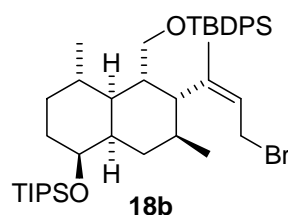

To a solution of alcohol **18a** (0.0720 g, 0.106 mmol) in  $\text{Et}_2\text{O}$  (3 mL) was added pyridine (0.0258 mL, 0.319 mmol) and  $\text{PBr}_3$  (0.111 mL, 1.063 mmol) successively at 0  $^\circ\text{C}$ , and the reaction mixture was stirred at the same temperature for 30 min. After completion of the reaction, the reaction mixture was directly purified by flash chromatography ( $\text{Et}_2\text{O}$ ) to afford allylic bromide **18b**, which was immediately used for the next reaction:

$R_f = 0.64$  (hexane/ethyl acetate = 10/1).

**(+)-(1*S*,2*R*,3*S*,4*aR*,5*S*,8*S*,8*aS*)-1-(*tert*-Butyl-diphenyl-silyloxy)methyl)-3,8-dimethyl-2-[(*Z*)-1-methyl-propenyl]-5-triisopropylsilyloxy-decahydro-naphthalene (19)**

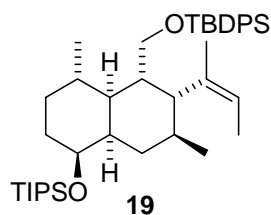

To a solution of allylic bromide **18b** obtained as above in Et<sub>2</sub>O (3 mL) was added LiAlH<sub>4</sub> (0.0274 g, 0.578 mmol) portionwise at 0 °C, and the reaction mixture was stirred at room temperature for 30 min. To the reaction mixture was added saturated aqueous Na<sub>2</sub>SO<sub>4</sub> at 0 °C until no gas evolution was observed, and white precipitates were filtered through Celite. The residue on Celite was washed with Et<sub>2</sub>O, and the filtrate and washings were combined and evaporated. The residue was purified by flash chromatography (hexane/ethyl acetate=100/1) to give the alcohol **19** (0.0513 g, 73% (2 steps)) as a colorless oil:

R<sub>f</sub> = 0.22 (hexane/ethyl acetate = 30/1); <sup>1</sup>H NMR (400 MHz, CDCl<sub>3</sub>) δ 7.68-7.59 (4H, m), 7.44-7.30 (6H, m), 5.19-5.11 (1H, m), 3.82-3.70 (2H, m), 3.66 (1H, dd, *J*=9.8, 5.1 Hz), 2.40-2.33 (1H, m), 2.14-1.99 (2H, m), 1.84-1.70 (5H, m), 1.66-1.57 (2H, m), 1.55 (3H, d, *J*=6.1 Hz), 1.39 (3H, s), 1.14-0.98 (32H, m), 0.89 (3H, d, *J*=5.6 Hz), 0.75 (3H, d, *J*=6.1 Hz); <sup>13</sup>C NMR (100 MHz, CDCl<sub>3</sub>) δ 137.7, 135.5, 135.5, 134.4, 134.1, 129.5, 127.6, 127.5, 121.7, 100.6, 74.2, 62.4, 43.2, 42.3, 41.8, 38.0, 34.7, 30.3, 30.3, 29.3, 29.1, 27.2, 26.8, 22.1, 21.5, 20.0, 19.3, 18.2, 12.8, 12.5; IR (neat) ν<sub>max</sub> 2936, 2892, 2868, 1561, 1464, 1428, 1382, 1205, 1112, 1092, 1028, 1014, 998, 882, 820, 738 cm<sup>-1</sup>; FAB HRMS [M-H]<sup>+</sup> calcd for C<sub>42</sub>H<sub>67</sub>O<sub>2</sub>Si<sub>2</sub>: 659.4680, found: 659.4687; [α]<sub>D</sub><sup>17</sup> +48.7 (*c* 0.50, CHCl<sub>3</sub>).

**(+)-(1*S*,4*S*,4*aS*,5*S*,6*R*,7*S*,8*aR*)-5-Hydroxymethyl-4,7-dimethyl-6-[(*Z*)-1-methyl-propenyl]-decahydro-naphthalen-1-ol (19a)**

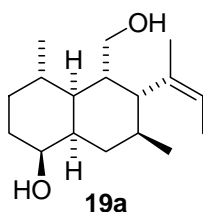

Compound **19a** (0.0190 g, 92%), a white solid, was prepared from **19** (0.0513 g, 0.0776 mmol) according to the procedure for diol **8** and purified by flash chromatography (hexane/ethyl acetate = 1/1):

$R_f = 0.21$  (hexane/ethyl acetate = 1/1); mp 167-169 °C;  $^1\text{H NMR}$  (400 MHz,  $\text{CD}_3\text{OD}$ )  $\delta$  5.26 (1H, q,  $J=6.8$  Hz), 3.62-3.46 (3H, m), 2.43-2.32 (1H, m), 2.06-1.96 (1H, m), 1.96-1.85 (1H, m), 1.79-1.39 (15H, m), 1.12-0.92 (2H, m), 0.83 (3H, d,  $J=6.1$  Hz), 0.73 (3H, d,  $J=5.9$  Hz);  $^{13}\text{C NMR}$  (100 MHz,  $\text{CD}_3\text{OD}$ )  $\delta$  139.0, 123.1, 74.0, 61.4, 44.4, 43.3, 43.0, 38.1, 35.6, 35.5, 30.2, 30.0, 28.4, 22.5, 22.0, 20.3, 13.2; IR (KBr)  $\nu_{\text{max}}$  3368, 2944, 2896, 1654, 1457, 1411, 1375, 1333, 1225, 1102, 1065, 1034, 1003, 942, 818  $\text{cm}^{-1}$ ; FAB HRMS  $[\text{M}+\text{H}]^+$  calcd for  $\text{C}_{17}\text{H}_{31}\text{O}_2$ : 267.2324, found: 267.2333;  $[\alpha]_{\text{D}}^{19} +81.5$  ( $c$  0.27,  $\text{CH}_3\text{OH}$ ).

**(+)-(1S,4S,4aS,5S,6R,7S,8aR)-5-(tert-Butyl-dimethyl-silyloxymethyl)-4,7-dimethyl-6-[(Z)-1-methyl-propenyl]-decahydro-naphthalen-1-ol (19b)**

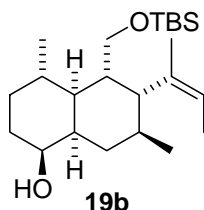

Compound **19b** (0.0262 g, 97%), a colorless oil, was prepared from **19a** (0.0190 g, 0.0713 mmol) according to the procedure for TBS ether **8a** and purified by flash chromatography (hexane/ethyl acetate = 10/1):

$R_f = 0.80$  (hexane/ethyl acetate = 1/1);  $^1\text{H NMR}$  (400 MHz,  $\text{CDCl}_3$ )  $\delta$  5.31 (1H, q,  $J=6.8$  Hz), 3.72-3.56 (3H, m), 2.46-2.35 (1H, m), 2.16-2.06 (1H, m), 1.97-1.88 (1H, m), 1.83-1.70 (2H, m), 1.70-1.48 (12H, m), 1.18-0.98 (2H, m), 0.89-0.83 (12H, m), 0.79 (3H, d,  $J=6.1$  Hz), 0.03-0.00 (6H, m);  $^{13}\text{C NMR}$  (100 MHz,  $\text{CDCl}_3$ )  $\delta$  137.6, 122.0, 73.4, 61.5, 42.8, 42.1, 41.8, 37.1, 34.3, 29.6, 29.0, 28.9, 27.1, 25.9, 22.0, 21.6, 19.9, 18.2, 12.8, -5.3, -5.4; IR ( $\text{CHCl}_3$ )  $\nu_{\text{max}}$  3364, 2932, 1464, 1380, 1362, 1256, 1216, 1092, 1060, 1010, 917, 836, 762  $\text{cm}^{-1}$ ; FAB HRMS  $[\text{M}+\text{Na}]^+$  calcd for  $\text{C}_{23}\text{H}_{44}\text{O}_2\text{SiNa}$ : 403.3008, found: 403.2998;  $[\alpha]_{\text{D}}^{22} +86.8$  ( $c$  0.23,  $\text{CHCl}_3$ ).

**(+)-Benzoic acid (1*S*,4*S*,4*aS*,5*S*,6*R*,7*S*,8*aR*)-5-(*tert*-butyl-dimethyl-silanyloxymethyl)-4,7-dimethyl-6-[(*Z*)-1-methyl-propenyl]-decahydro-naphthalen-1-yl ester (20)**

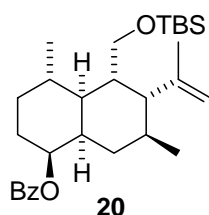

Compound **20** (0.0311 g, 90%), a colorless oil, was prepared from TBS ether **19b** (0.0262 g, 0.0688 mmol) according to the procedure for benzoate **9** and purified by flash chromatography (hexane/ethyl acetate = 50/1):

$R_f = 0.70$  (hexane/ethyl acetate = 4/1);  $^1\text{H NMR}$  (400 MHz,  $\text{CDCl}_3$ )  $\delta$  8.09-8.02 (2H, m), 7.58-7.52 (1H, m), 7.48-7.41 (2H, m), 5.33 (1H, q,  $J=6.3$  Hz), 5.06 (1H, ddd,  $J=11.5, 4.6, 4.6$  Hz), 3.69-3.58 (2H, m), 2.50-2.30 (2H, m), 1.99-1.55 (15H, m), 1.39-1.27 (1H, m), 0.92 (3H, d,  $J=6.1$  Hz), 0.90-0.86 (9H, m), 0.82 (3H, d,  $J=5.9$  Hz), 0.06-0.01 (6H, m);  $^{13}\text{C NMR}$  (100 MHz,  $\text{CDCl}_3$ )  $\delta$  165.8, 137.6, 132.6, 131.0, 129.5, 128.3, 122.0, 76.3, 61.6, 42.8, 42.3, 41.7, 34.7, 34.0, 30.0, 28.9, 27.2, 26.2, 25.9, 22.0, 21.5, 19.9, 18.2, 12.8, -5.3, -5.4; IR (neat)  $\nu_{\text{max}}$  2932, 2860, 1720, 1561, 1539, 1452, 1380, 1316, 1278, 1176, 1116, 1090, 1046, 1006, 984, 961, 916, 883, 836  $\text{cm}^{-1}$ ; FAB HRMS  $[\text{M}+\text{Na}]^+$  calcd for  $\text{C}_{30}\text{H}_{48}\text{O}_3\text{SiNa}$ : 507.3270, found: 507.3264;  $[\alpha]_D^{18} +60.7$  ( $c$  0.28,  $\text{CHCl}_3$ ).

**(+)-Benzoic acid (1*S*,4*S*,4*aS*,5*S*,6*R*,7*S*,8*aR*)-5-hydroxymethyl-4,7-dimethyl-6-[(*Z*)-1-methyl-propenyl]-decahydro-naphthalen-1-yl ester (20a)**

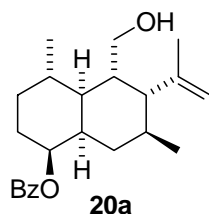

Compound **20a** (0.0232 g, 100%), a colorless oil, was prepared from benzoate **20** (0.0311 g, 0.0626 mmol) according to the procedure for alcohol **9a** and purified by flash chromatography (hexane/ethyl acetate = 8/1):

$R_f = 0.30$  (hexane/ethyl acetate = 4/1);  $^1\text{H NMR}$  (400 MHz,  $\text{CDCl}_3$ )  $\delta$  8.08-8.00 (2H, m), 7.59-7.50 (1H, m), 7.49-7.39 (2H, m), 5.36 (1H, q,  $J=6.6$  Hz), 5.07 (1H, ddd,  $J=10.7, 5.1, 5.1$  Hz), 3.77 (1H, dd,  $J=9.8, 5.4$  Hz), 3.65 (1H, dd,  $J=9.8, 9.8$  Hz), 2.53-2.41 (1H, m), 2.36-2.26 (1H, m), 2.07-1.53 (16H, m), 1.41-1.28 (1H, m), 0.96 (3H, d,  $J=6.3$  Hz), 0.84 (3H, d,  $J=5.9$  Hz);  $^{13}\text{C NMR}$  (100 MHz,  $\text{CDCl}_3$ )  $\delta$  165.9, 137.3, 132.7, 130.9, 129.5, 128.3, 122.6, 76.2, 62.1, 43.3, 43.1, 41.3, 34.7, 33.9, 29.8, 28.7, 27.2, 26.1, 21.9, 21.4, 19.8, 12.9; IR ( $\text{CHCl}_3$ )  $\nu_{\text{max}}$  3484, 2928, 2872, 1708, 1572, 1539, 1452, 1382, 1318, 1294, 1280, 1216, 1178, 1120, 1072, 1026, 982, 754  $\text{cm}^{-1}$ ; FAB HRMS  $[\text{M}+\text{Na}]^+$  calcd for  $\text{C}_{24}\text{H}_{34}\text{O}_3\text{Na}$ : 393.2406, found:393.2404;  $[\alpha]_{\text{D}}^{21} +47.0$  ( $c$  0.27,  $\text{CHCl}_3$ ).

**(+)-Benzoic acid (1S,4S,4aR,5S,6R,7S,8aR)-5-formyl-4,7-dimethyl-6-[(Z)-1-methyl-propenyl]-decahydro-naphthalen-1-yl ester (21)**

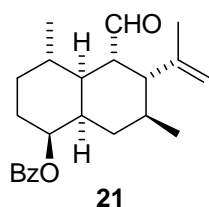

Compound **21** (0.0210 g, 88%), a colorless oil, was prepared from alcohol **20a** (0.0240 g, 0.0648 mmol) according to the procedure for aldehyde **10** and purified by flash chromatography (hexane/ethyl acetate = 20/1):

$R_f = 0.52$  (hexane/ethyl acetate = 4/1);  $^1\text{H NMR}$  (400 MHz,  $\text{CDCl}_3$ )  $\delta$  10.0 (1H, d,  $J=2.7$  Hz), 8.08-8.02 (2H, m), 7.59-7.52 (1H, m), 7.48-7.41 (2H, m), 5.42 (1H, q,  $J=5.6$  Hz), 5.08 (1H, ddd,  $J=11.7, 4.9, 4.9$  Hz), 2.68-2.58 (2H, m), 2.48-2.38 (1H, m), 1.98-1.57 (14H, m), 1.47-1.35 (1H, m), 0.94 (3H, d,  $J=6.1$  Hz), 0.89 (3H, d,  $J=6.1$  Hz);  $^{13}\text{C NMR}$  (100 MHz,  $\text{CDCl}_3$ )  $\delta$  205.8, 165.7, 135.7, 132.8, 130.7, 129.5, 128.3, 123.6, 75.3, 53.9, 43.3, 41.6, 41.5, 36.5, 33.4, 30.2, 29.9, 27.1, 26.0, 21.1, 19.5, 13.0; IR ( $\text{CHCl}_3$ )

$\nu_{\max}$  2932, 2876, 2740, 1720, 1604, 1586, 1452, 1382, 1318, 1278, 1176, 1116, 1072, 1026, 982, 758  $\text{cm}^{-1}$ ; FAB HRMS  $[\text{M}+\text{H}]^+$  calcd for  $\text{C}_{24}\text{H}_{33}\text{O}_3$ : 369.2430, found: 369.2424;  $[\alpha]_{\text{D}}^{21} +121.7$  ( $c$  0.28,  $\text{CHCl}_3$ ).

**(+)-Benzoic acid (1*S*,4*S*,4*aS*,5*S*,6*R*,7*S*,8*aR*)-5-[(1*E*,3*E*)-4-ethoxycarbonyl-buta-1,3-dienyl]-4,7-dimethyl-6-[(*Z*)-1-methyl-propenyl]-decahydro-naphthalen-1-yl ester (21a)**

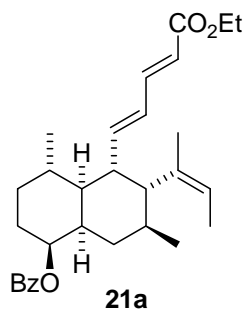

Compound **21a** (0.0260 g, 98%), a colorless oil, was prepared from **21** (0.0210 g, 0.0570 mmol) according to the procedure for ester **10a** and purified by flash chromatography (hexane/ethyl acetate = 20/1). Aldehyde **21** did not remain in the reaction with phosphonate **11**, thus, all the starting material was consumed in one reaction in contrast with the reaction of aldehyde **10**:

$R_f = 0.52$  (hexane/ethyl acetate = 4/1);  $^1\text{H}$  NMR (400 MHz,  $\text{CDCl}_3$ )  $\delta$  8.10-8.02 (2H, m), 7.60-7.51 (1H, m), 7.50-7.41 (2H, m), 7.26 (1H, dd,  $J=15.4, 11.2$  Hz), 6.54 (1H, dd,  $J=14.9, 9.8$  Hz), 6.10 (1H, dd,  $J=14.9, 11.2$  Hz), 5.78 (1H, d,  $J=15.4$  Hz), 5.27 (1H, q,  $J=6.3$  Hz), 5.01 (1H, ddd,  $J=11.0, 5.1, 5.1$  Hz), 4.25-4.14 (2H, m), 2.60-2.40 (3H, m), 2.01-1.76 (6H, m), 1.60 (3H, d,  $J=6.3$  Hz), 1.50 (3H, s), 1.46-1.32 (1H, m), 1.32-1.22 (5H, m), 0.98 (3H, d,  $J=6.3$  Hz), 0.84 (3H, d,  $J=5.9$  Hz);  $^{13}\text{C}$  NMR (100 MHz,  $\text{CDCl}_3$ )  $\delta$  167.1, 165.8, 146.4, 144.9, 137.2, 132.8, 130.8, 129.5, 128.5, 128.3, 121.5, 119.8, 75.9, 60.2, 49.9, 45.4, 42.8, 35.3, 33.6, 30.0, 28.6, 27.7, 26.1, 21.0, 20.9, 19.5, 14.3, 12.7; IR ( $\text{CHCl}_3$ )  $\nu_{\max}$  2932, 2876, 1714, 1638, 1452, 1380, 1278, 1178, 1158, 1134, 1116, 1070, 1028, 1002, 984, 758  $\text{cm}^{-1}$ ; FAB HRMS  $[\text{M}+\text{Na}]^+$  calcd for  $\text{C}_{30}\text{H}_{40}\text{O}_4\text{Na}$ : 487.2824, found: 487.2815;  $[\alpha]_{\text{D}}^{20} +308.1$  ( $c$  0.19,  $\text{CHCl}_3$ ).



**(+)-(2E,4E)-5-[(1S,2R,3S,4aR,5S,8S,8aS)--5-Hydroxy-3,8-dimethyl-2-[(Z)-1-methyl-propenyl]-decahydro-naphthalen-1-yl]-penta-2,4-dienoic acid (NH006)**

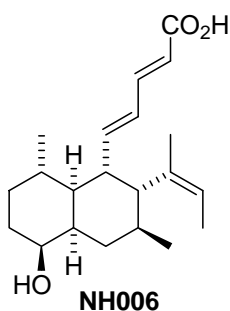

**NH006** (0.0152 g, 82%), a colorless oil, was prepared from ester **21a** (0.0260 g, 0.0560 mmol) according to the procedure for hydroxycarboxylic acid **12** and purified by flash chromatography (hexane/ethyl acetate = 2/1).

$R_f = 0.29$  (hexane/ethyl acetate = 1/1);  $^1\text{H NMR}$  (600 MHz,  $\text{CDCl}_3$ )  $\delta$  7.35 (1H, dd,  $J=15.4, 11.0$  Hz), 6.62 (1H, dd,  $J=14.8, 10.2$  Hz), 6.13 (1H, dd,  $J=14.8, 11.0$  Hz), 5.79 (1H, d,  $J=15.4$  Hz), 5.27 (1H, qd,  $J=6.7, 1.3$  Hz), 3.67 (1H, ddd,  $J=11.8, 4.9, 4.9$  Hz), 2.58-2.46 (2H, m), 2.23-2.16 (1H, m), 1.90-1.72 (4H, m), 1.69-1.64 (1H, m), 1.63-1.53 (5H, m), 1.51 (3H, s), 1.24-1.16 (1H, m), 1.16-1.10 (1H, m), 1.08-1.00 (1H, m), 0.93 (3H, d,  $J=6.4$  Hz), 0.83 (3H, d,  $J=6.1$  Hz);  $^{13}\text{C NMR}$  (150 MHz,  $\text{CDCl}_3$ )  $\delta$  171.5, 148.5, 147.3, 137.8, 128.2, 121.5, 118.5, 73.1, 50.3, 45.6, 43.0, 38.1, 33.9, 29.7, 29.5, 29.0, 28.8, 27.7, 21.0, 19.5, 12.7; IR ( $\text{CHCl}_3$ )  $\nu_{\text{max}}$  3388, 2924, 1690, 1636, 1614, 1456, 1416, 1380, 1306, 1270, 1244, 1160, 1106, 1076, 1050, 1002, 952, 754  $\text{cm}^{-1}$ ; FAB HRMS  $[\text{M}+\text{Na}]^+$  calcd for  $\text{C}_{21}\text{H}_{32}\text{O}_3\text{Na}$ : 355.2249, found: 355.2233;  $[\alpha]_{\text{D}}^{19} +267.5$  (c 033,  $\text{CHCl}_3$ ).

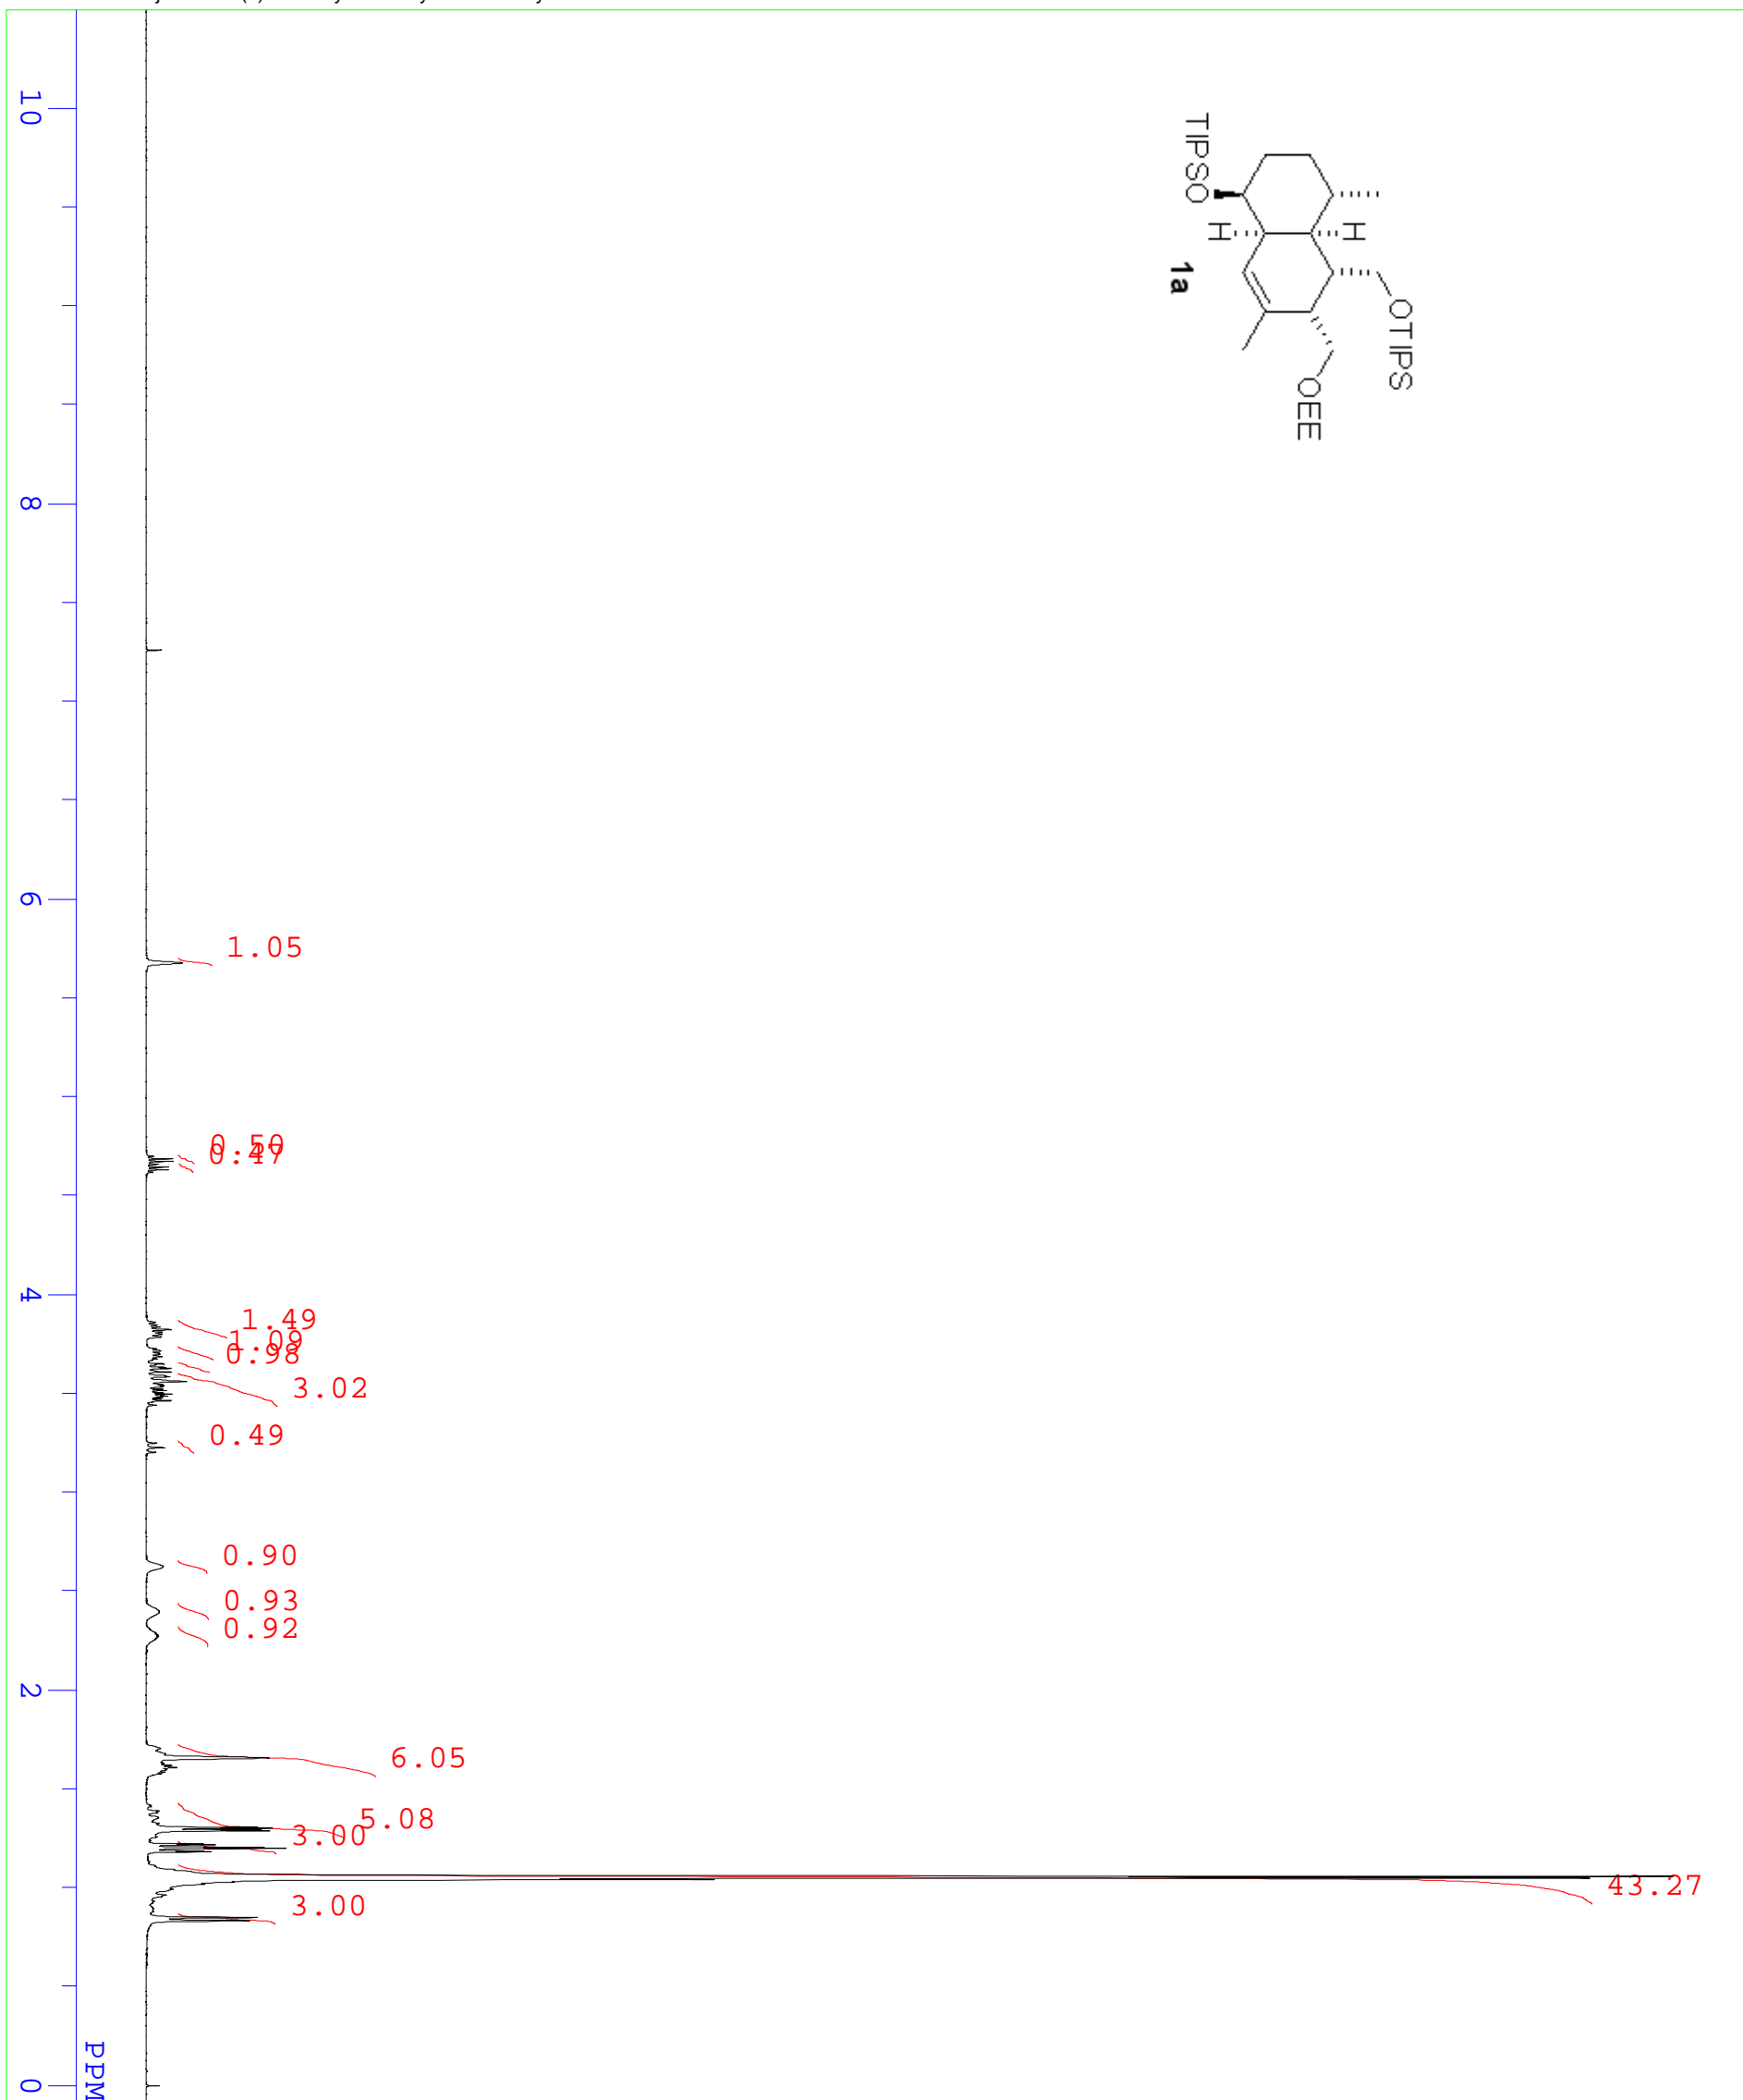

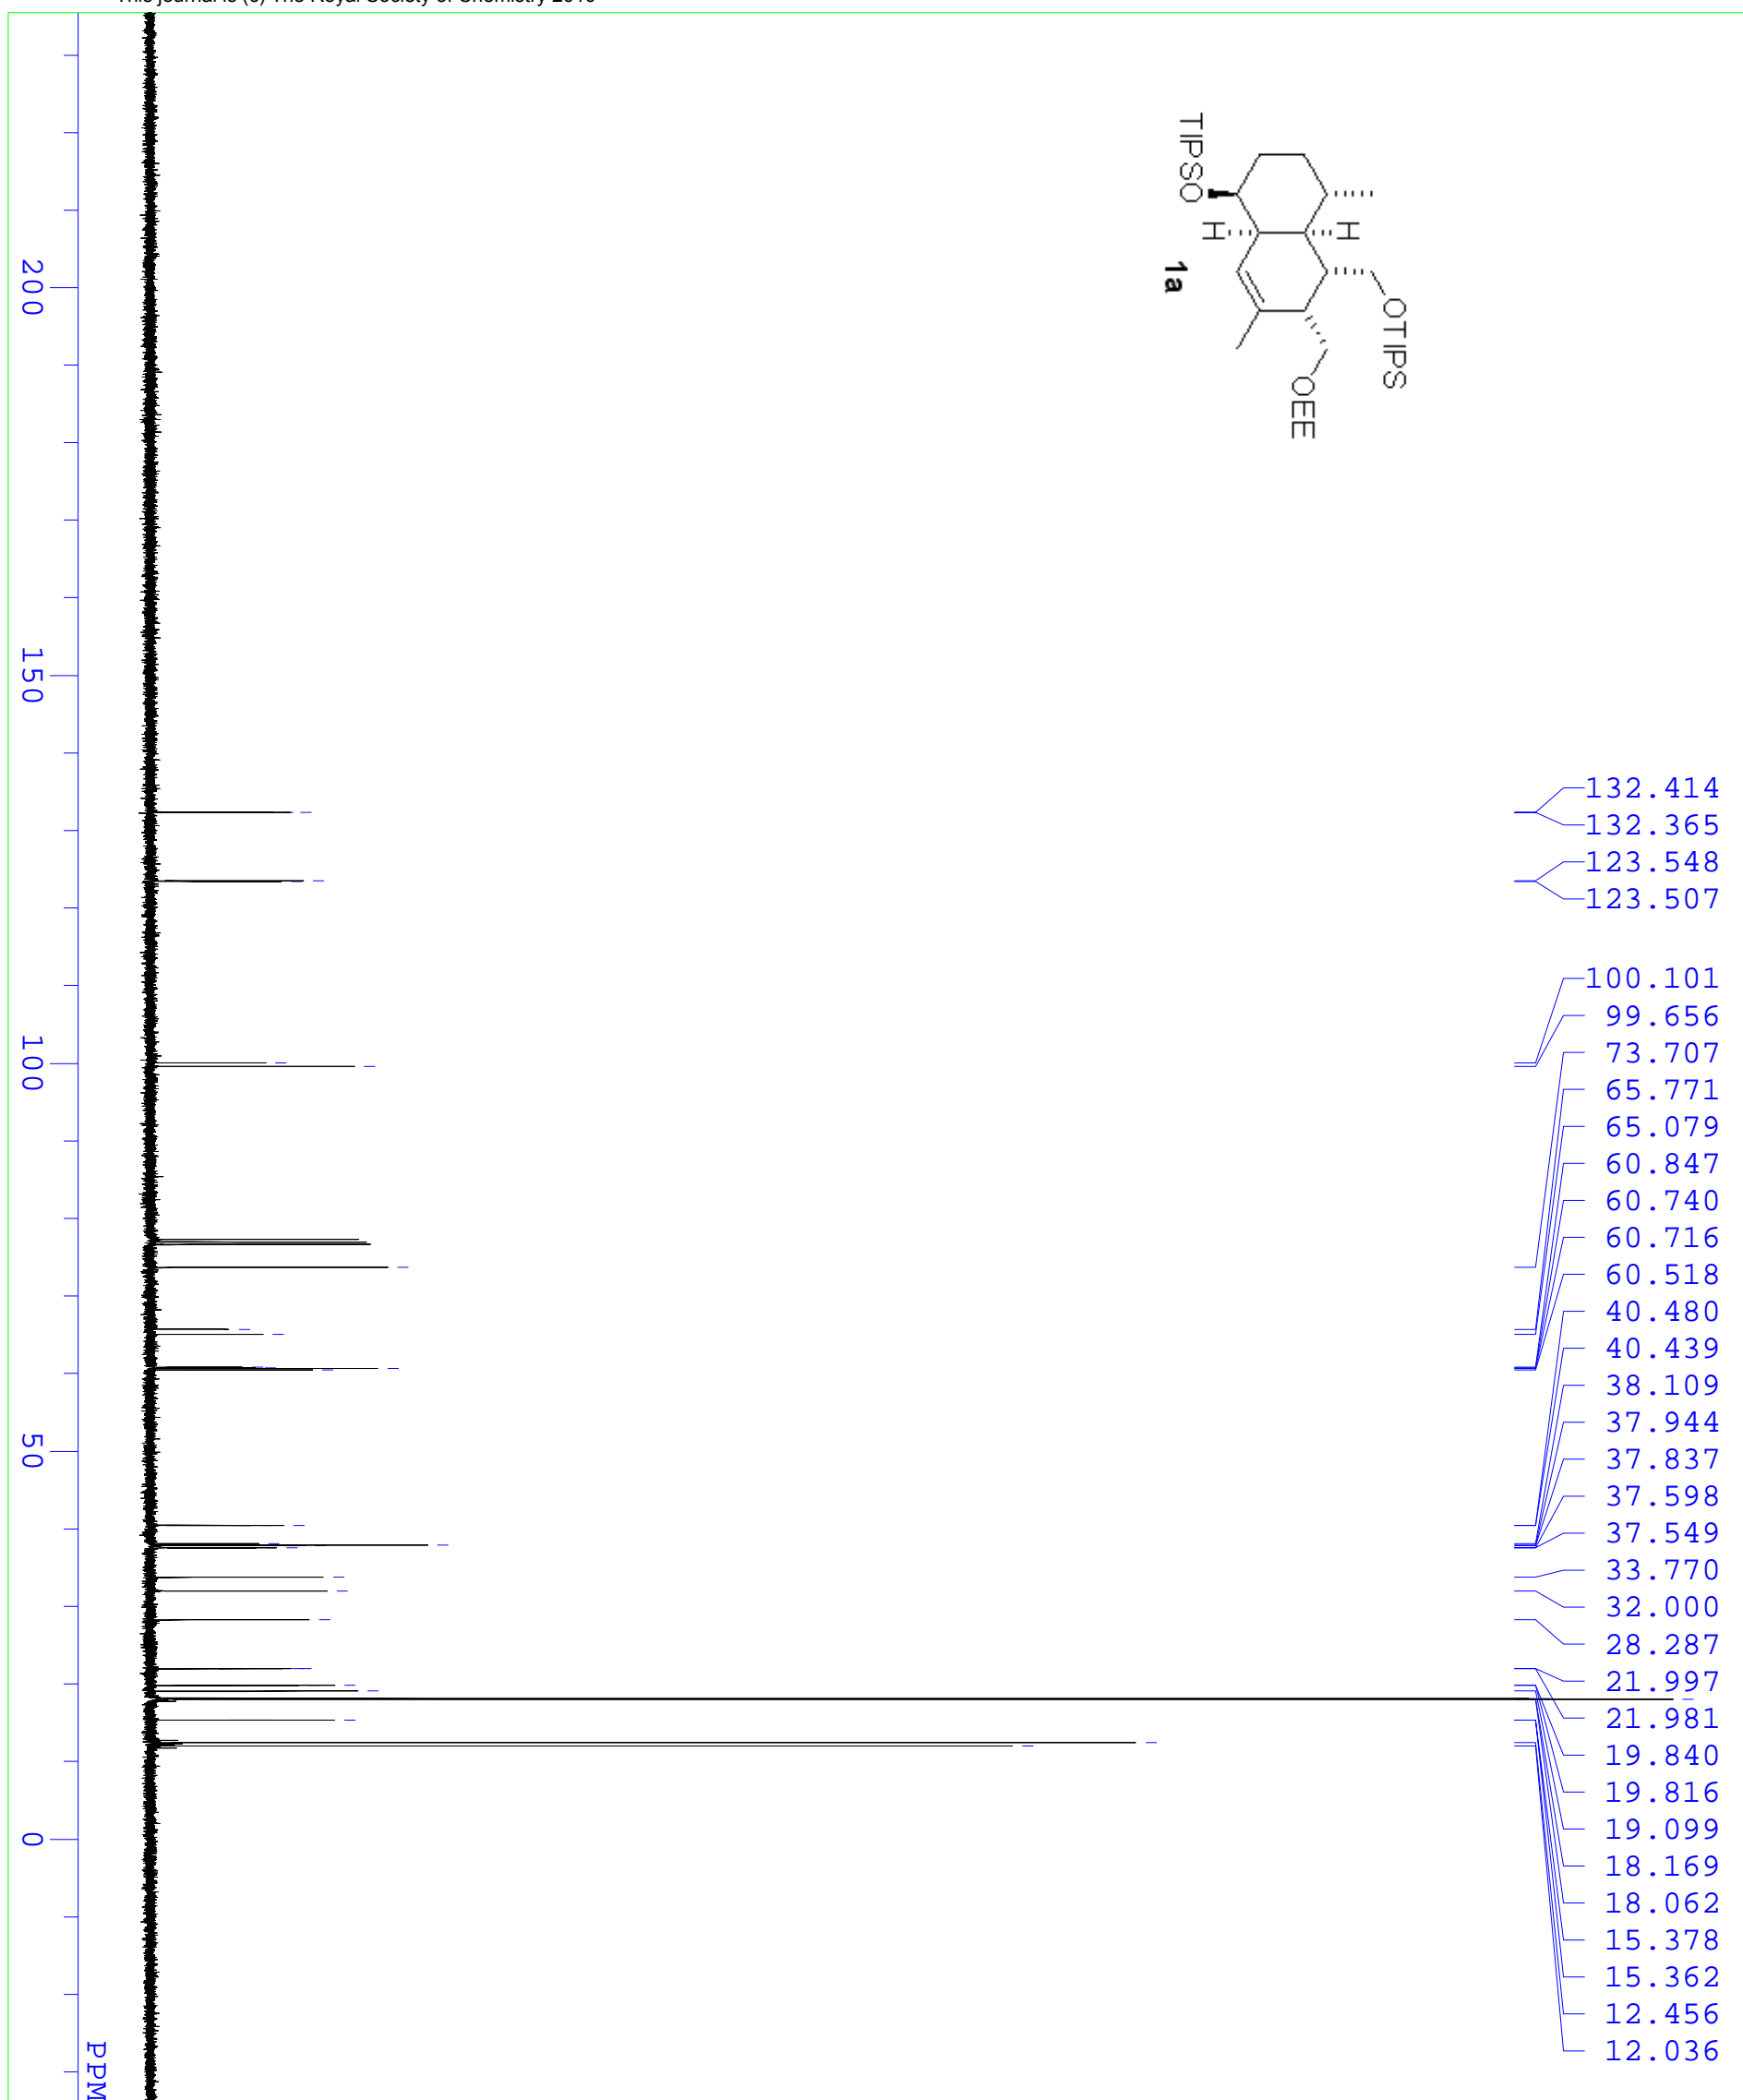

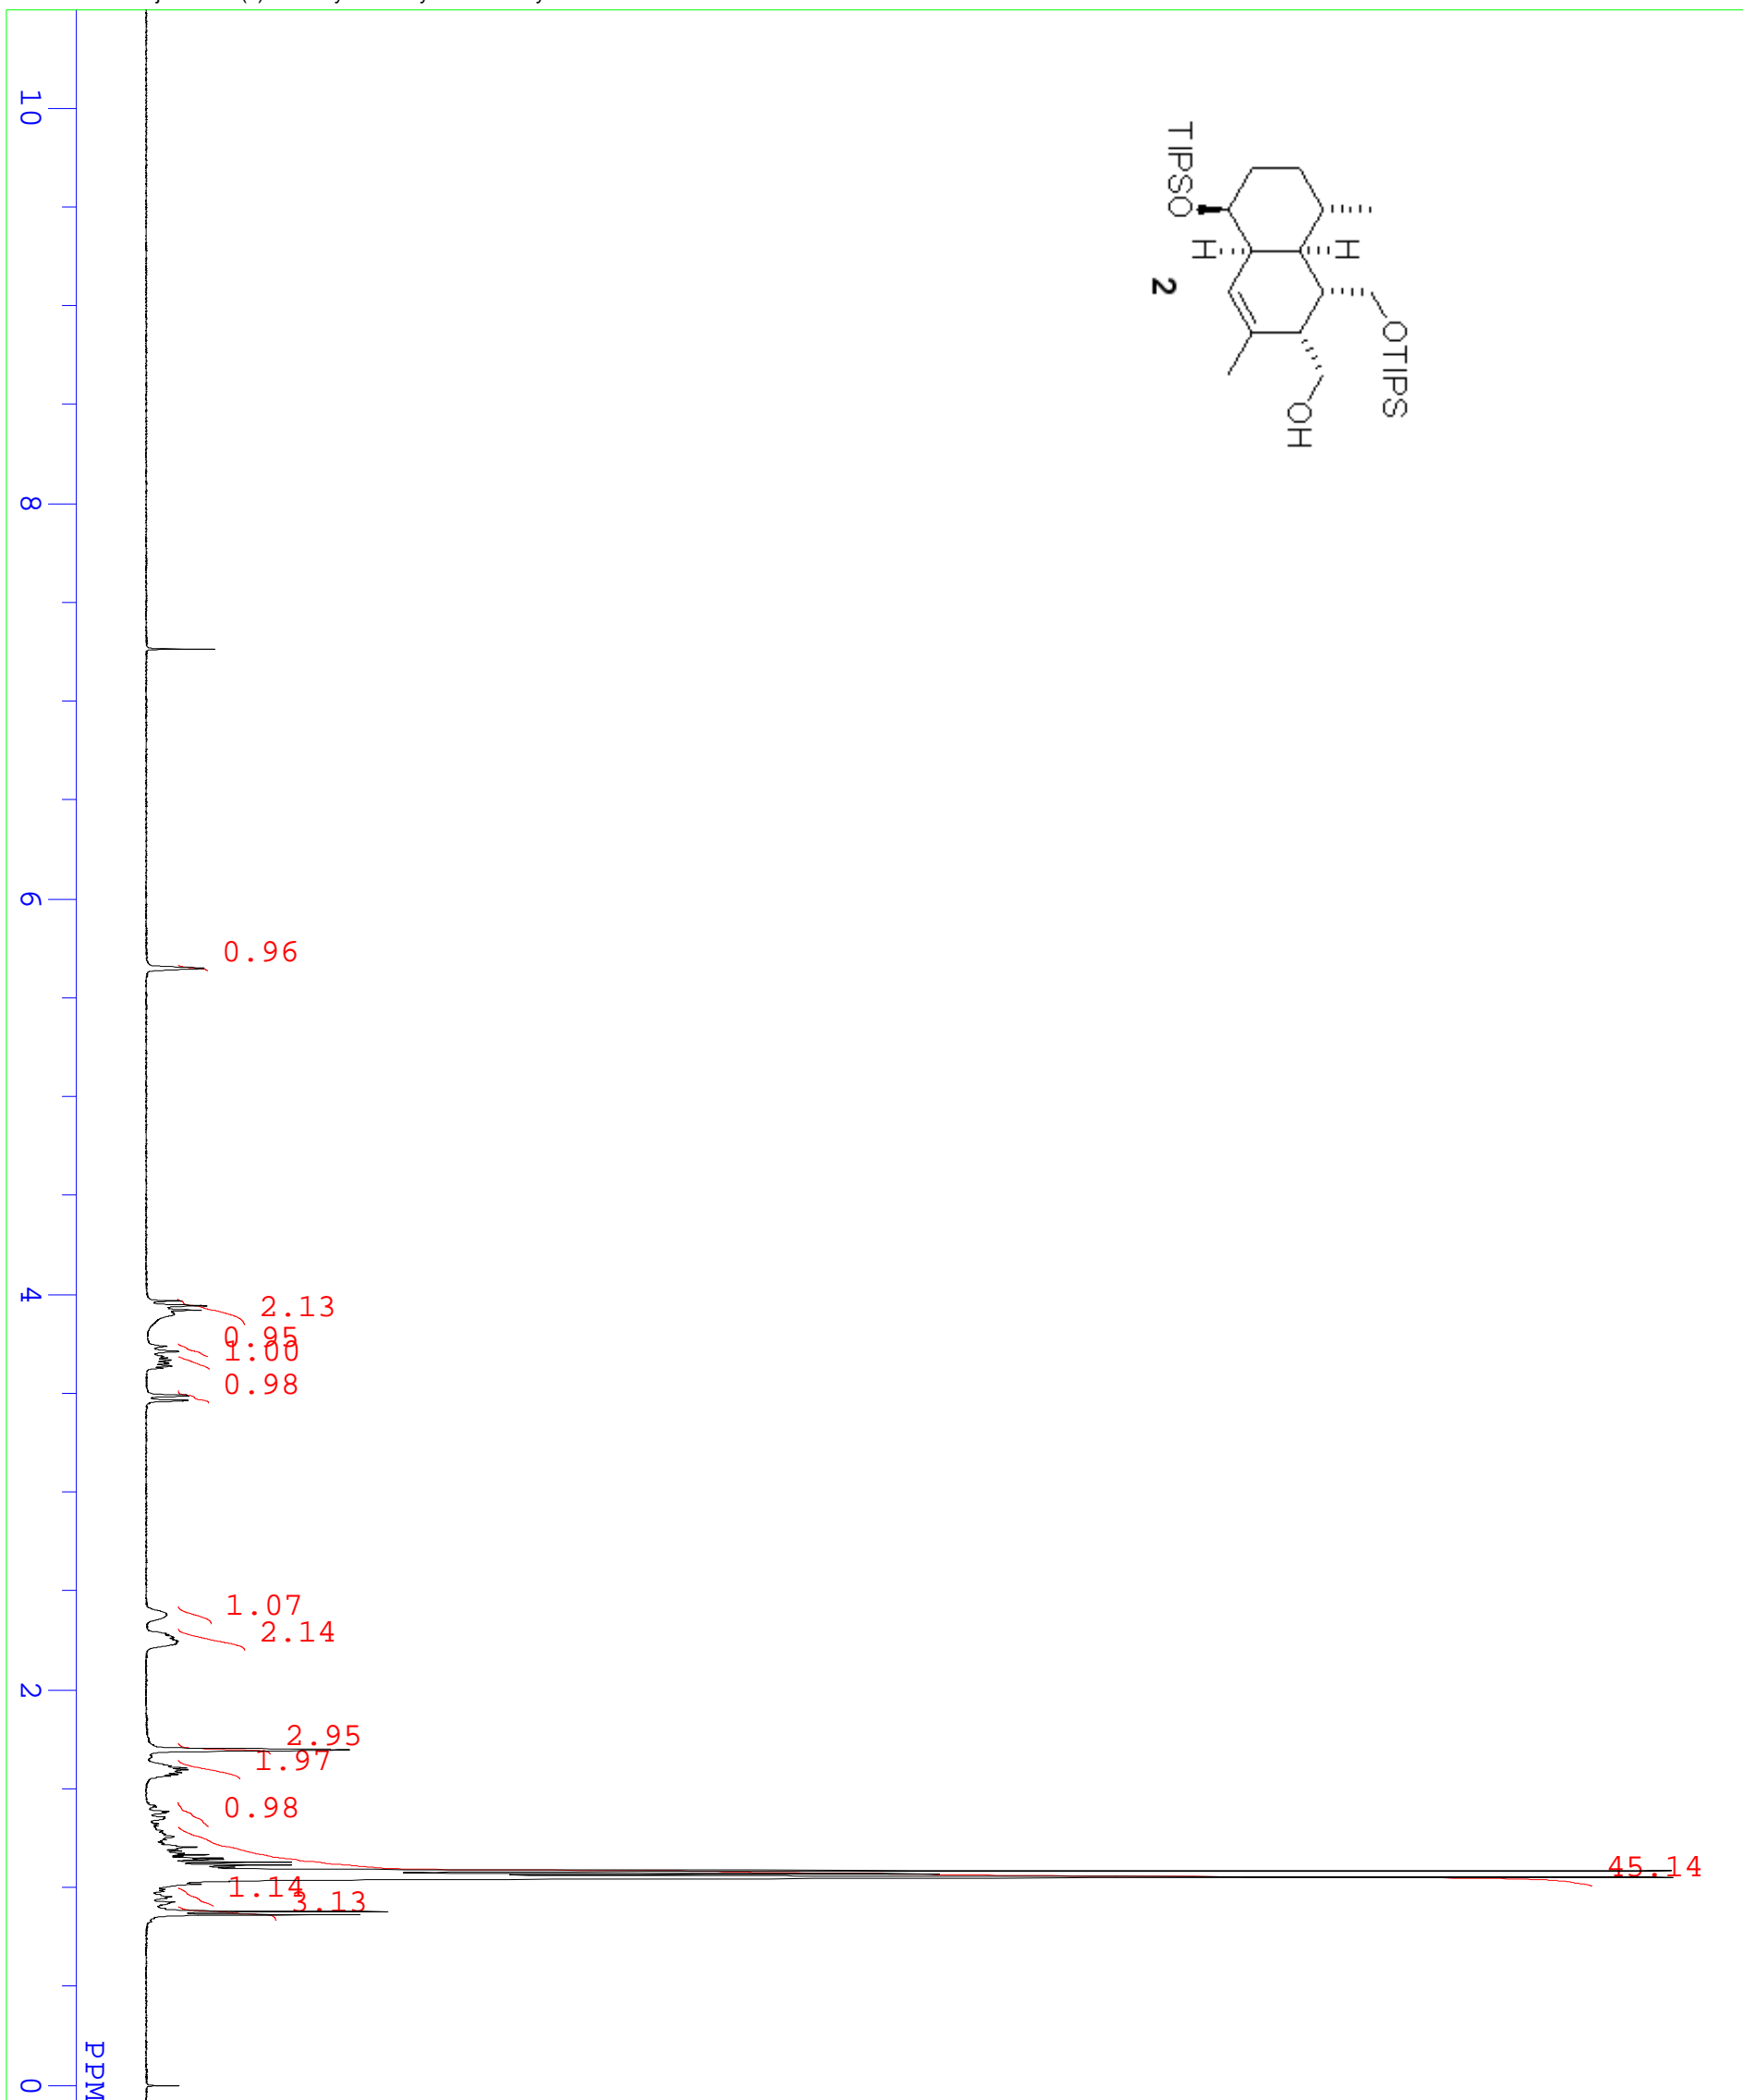

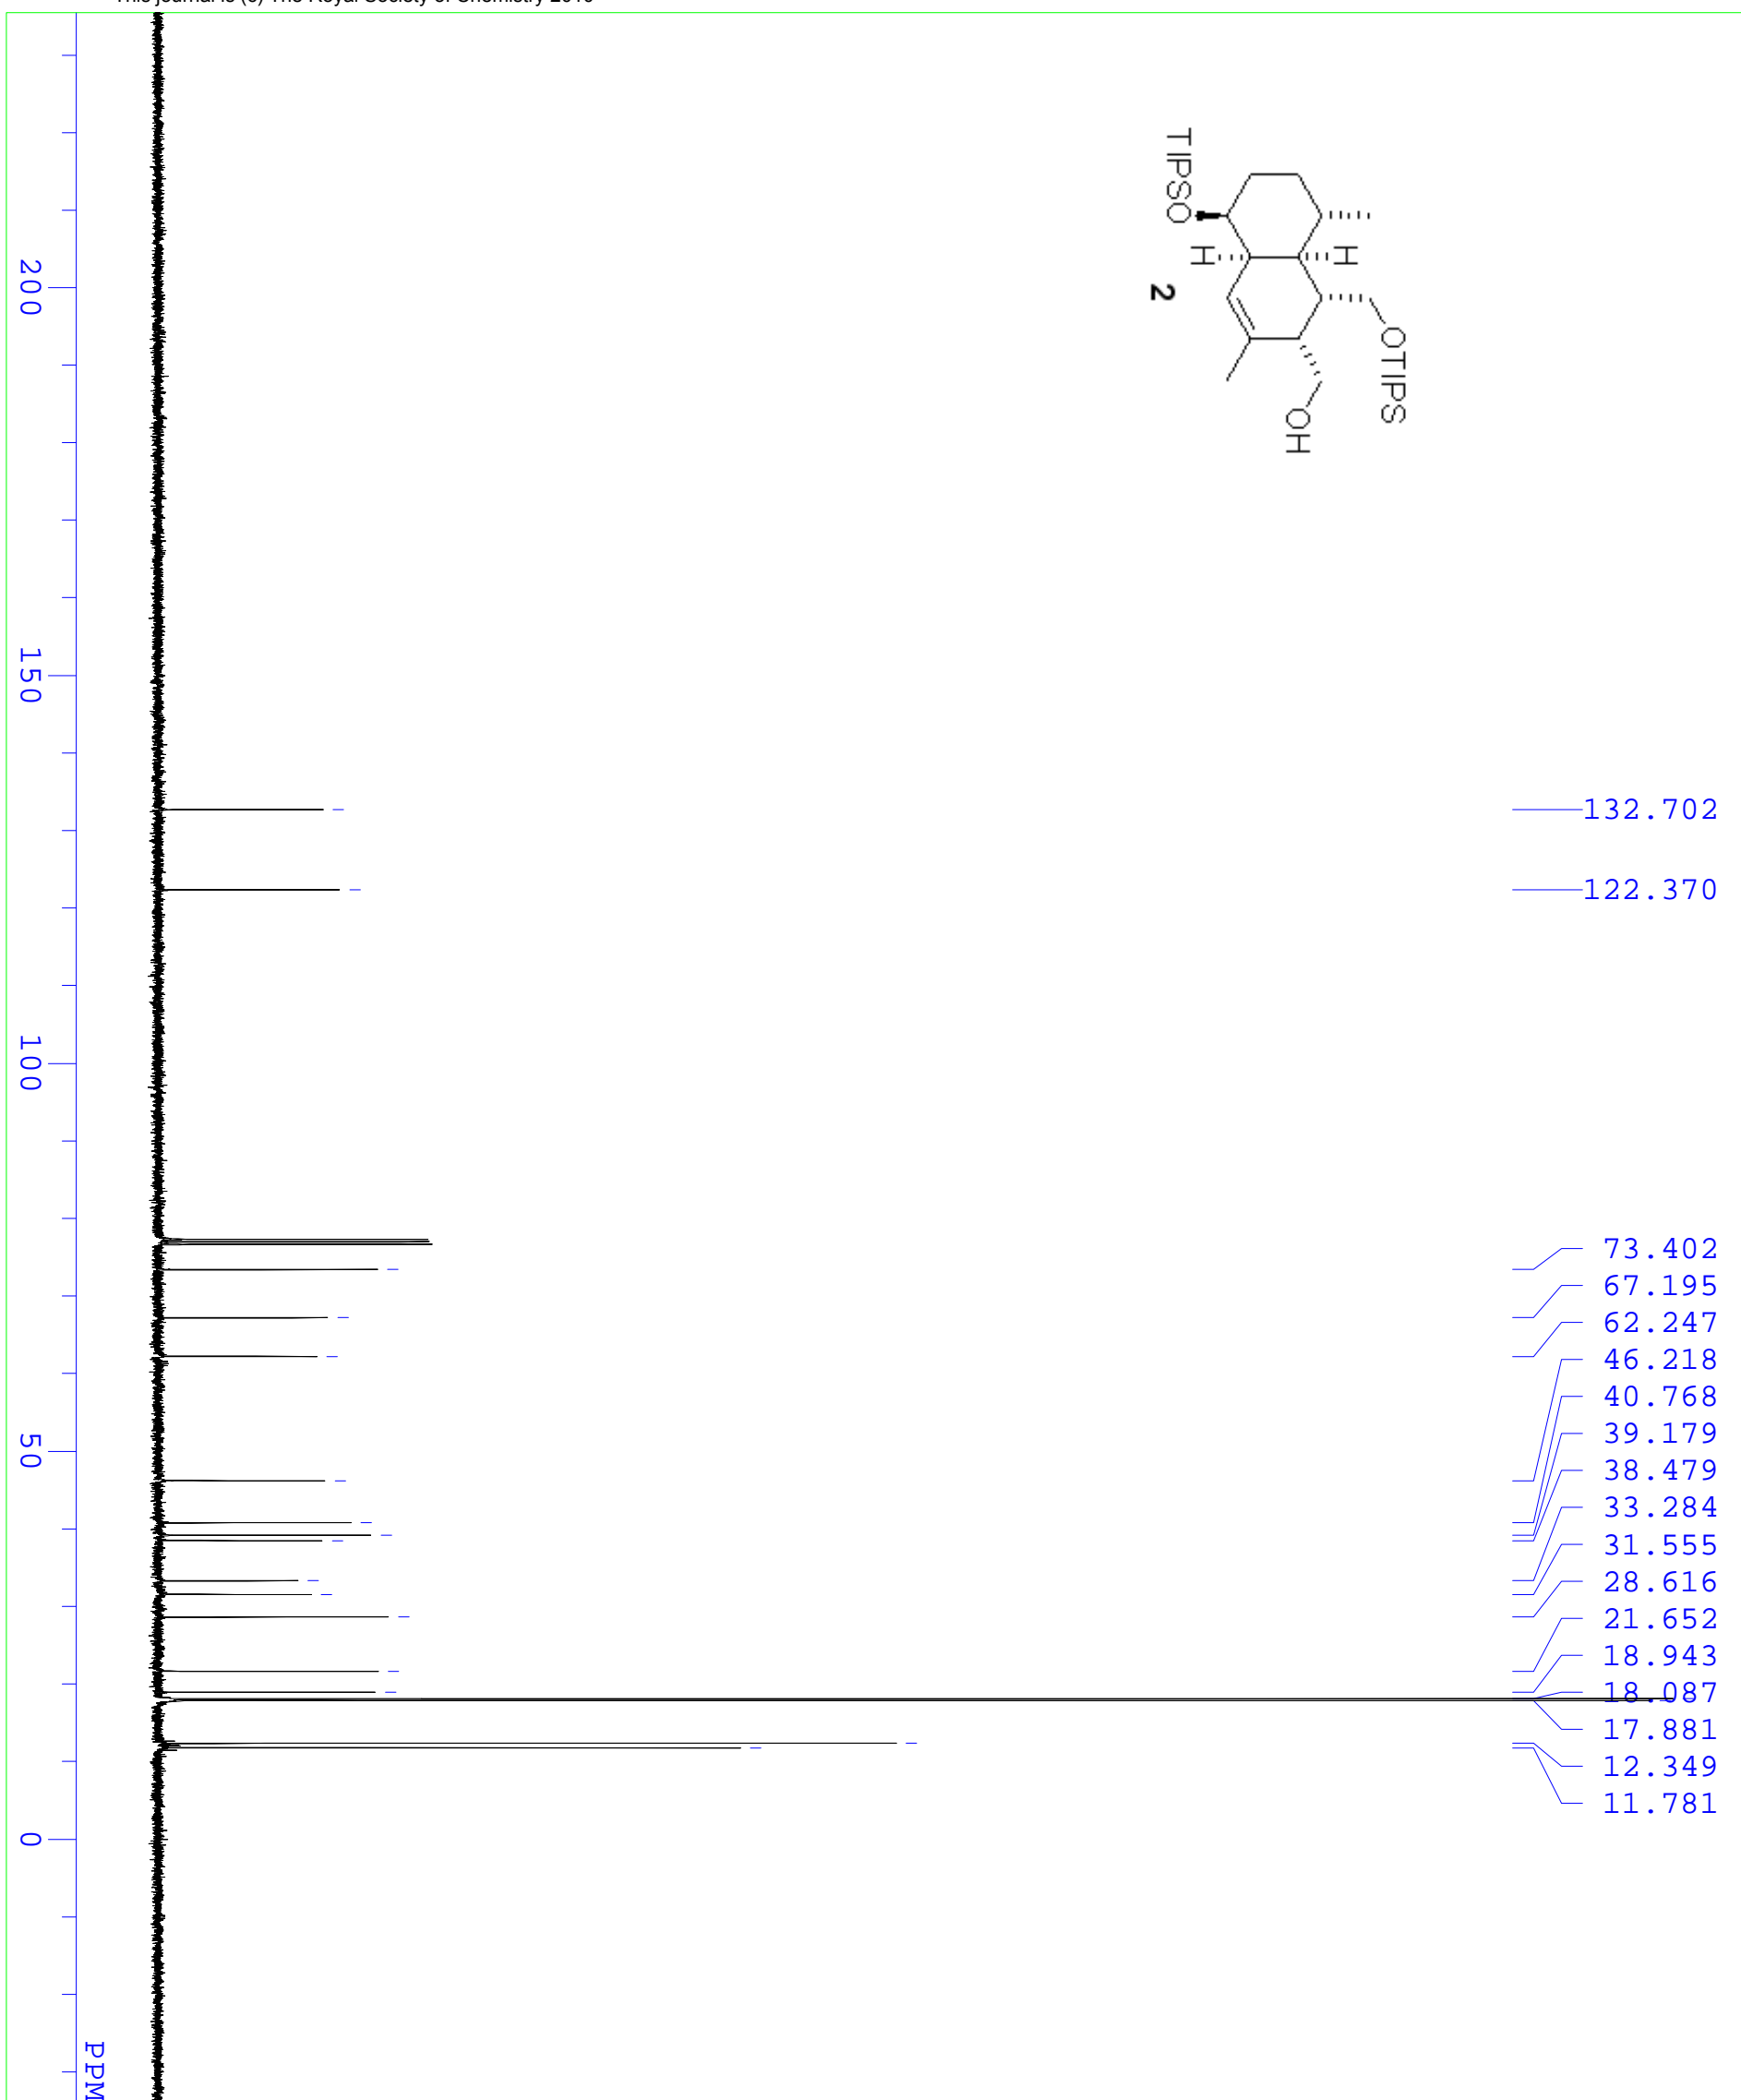

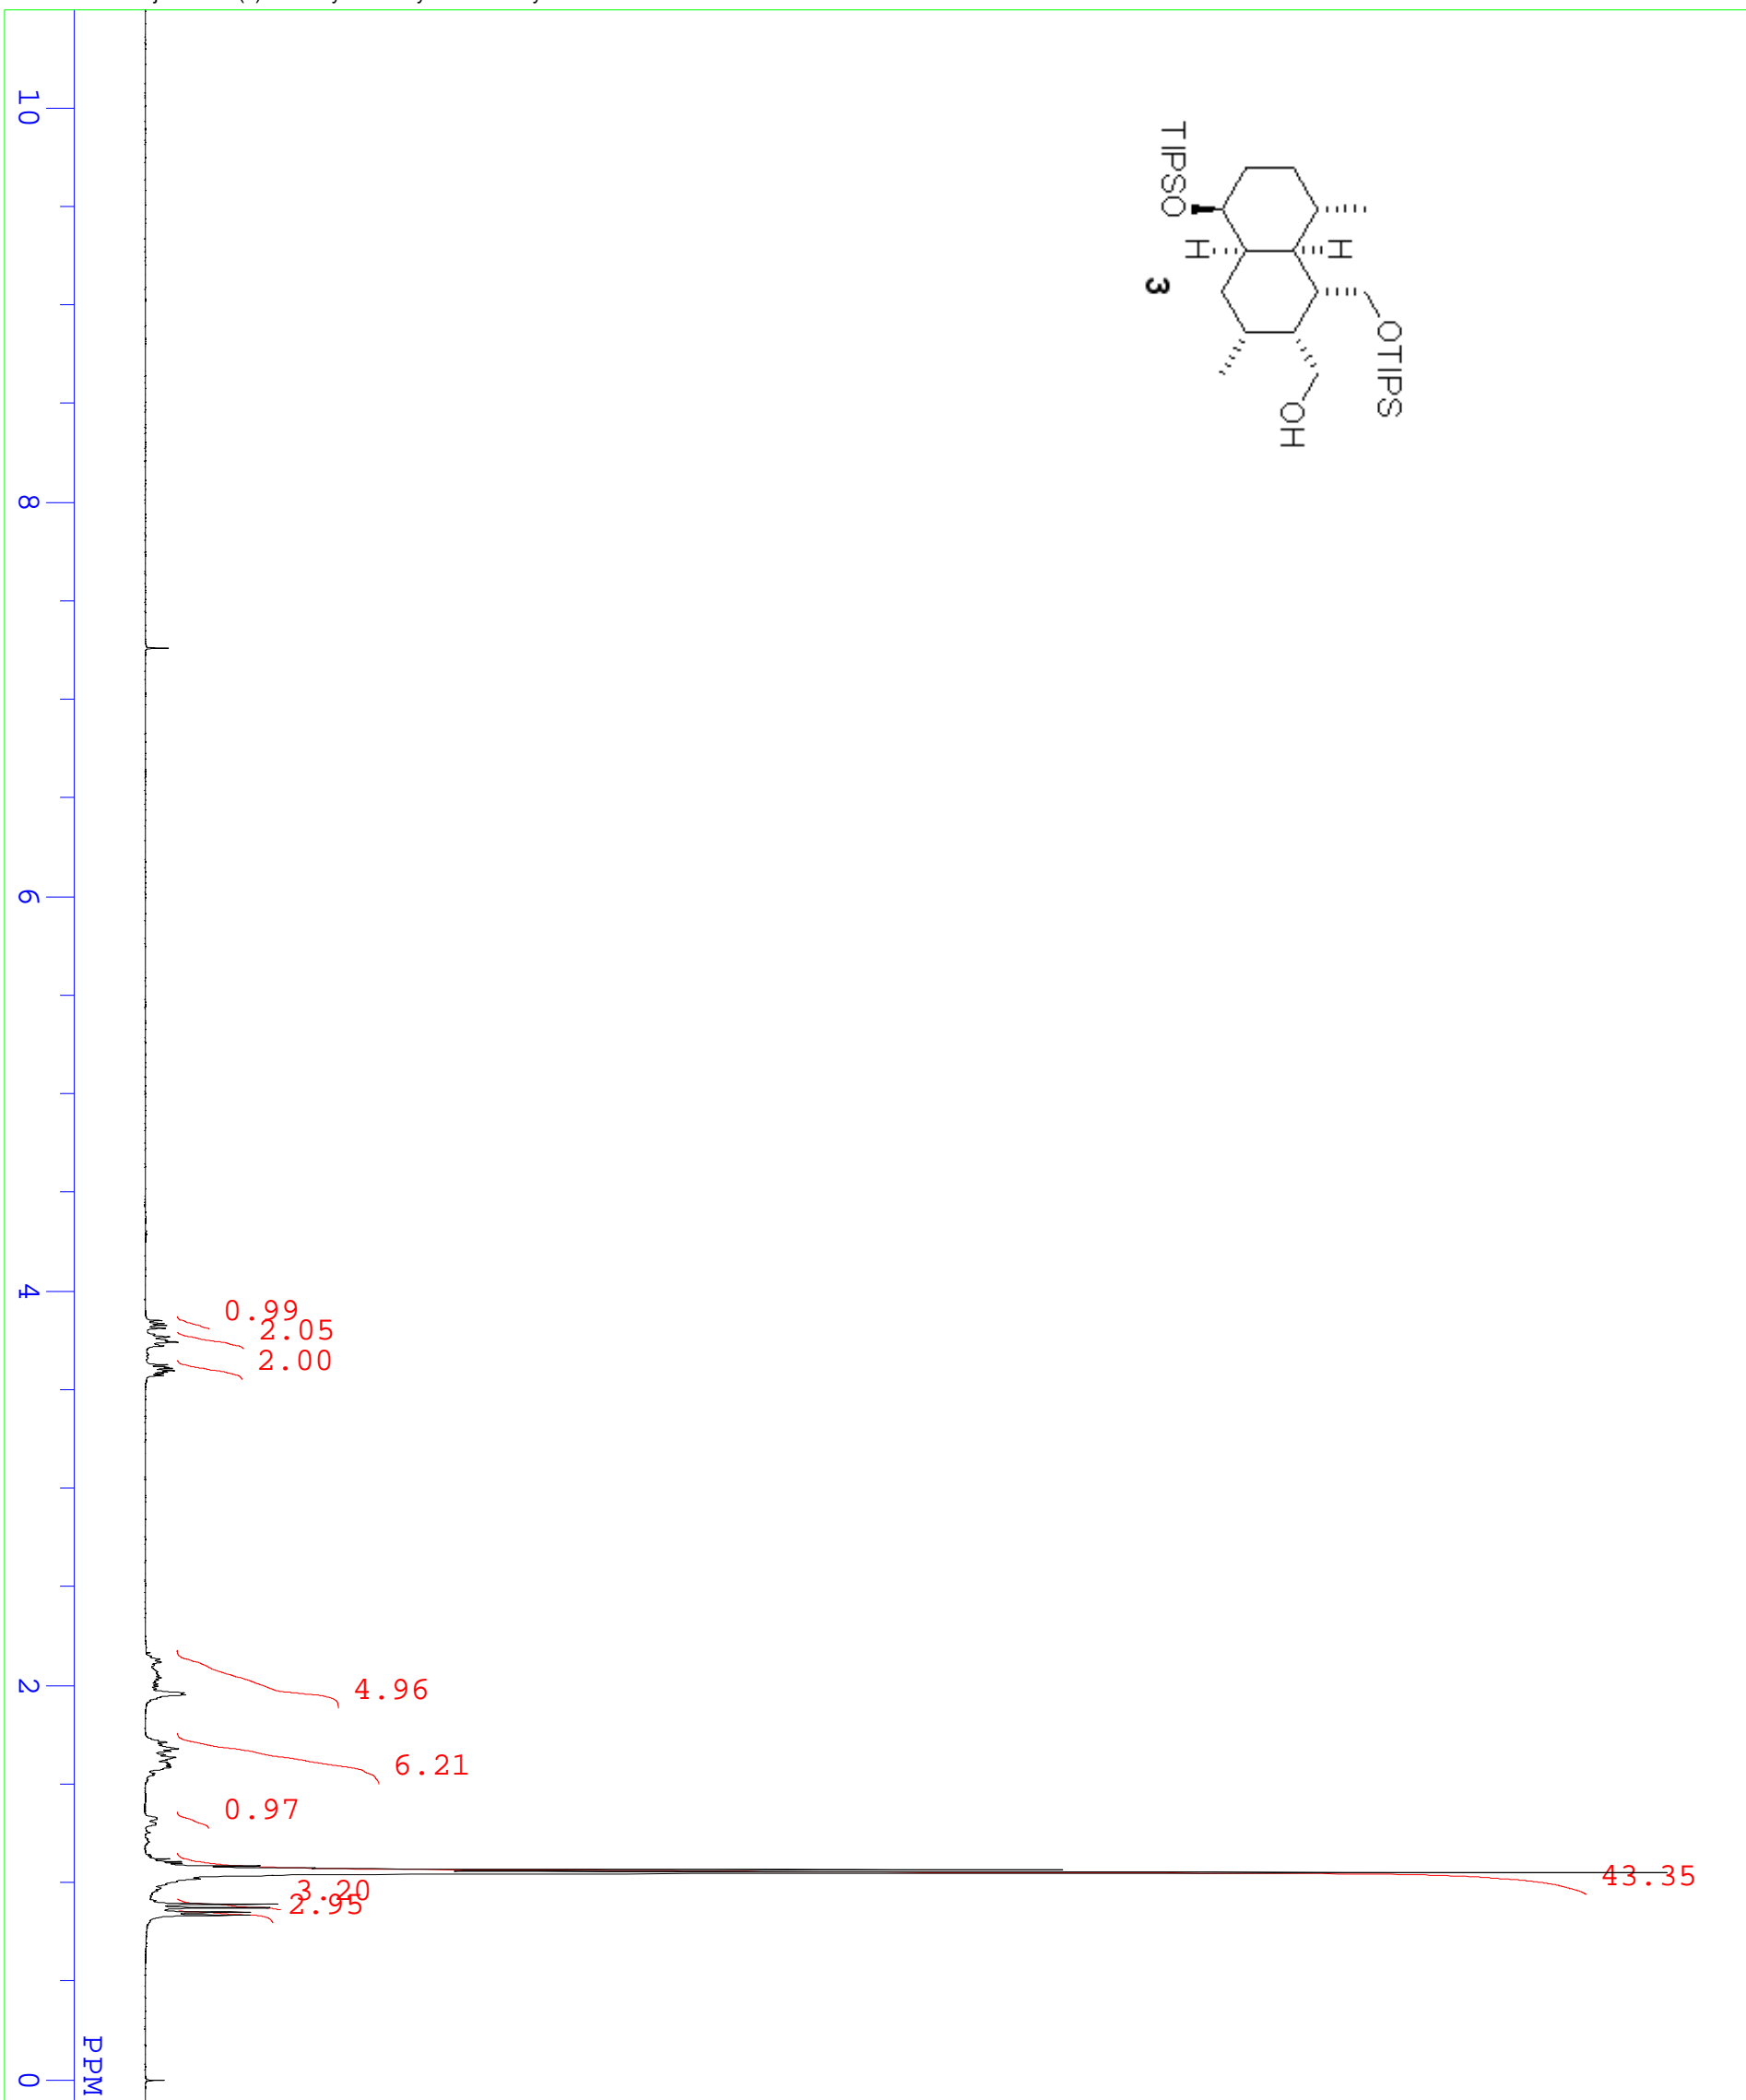

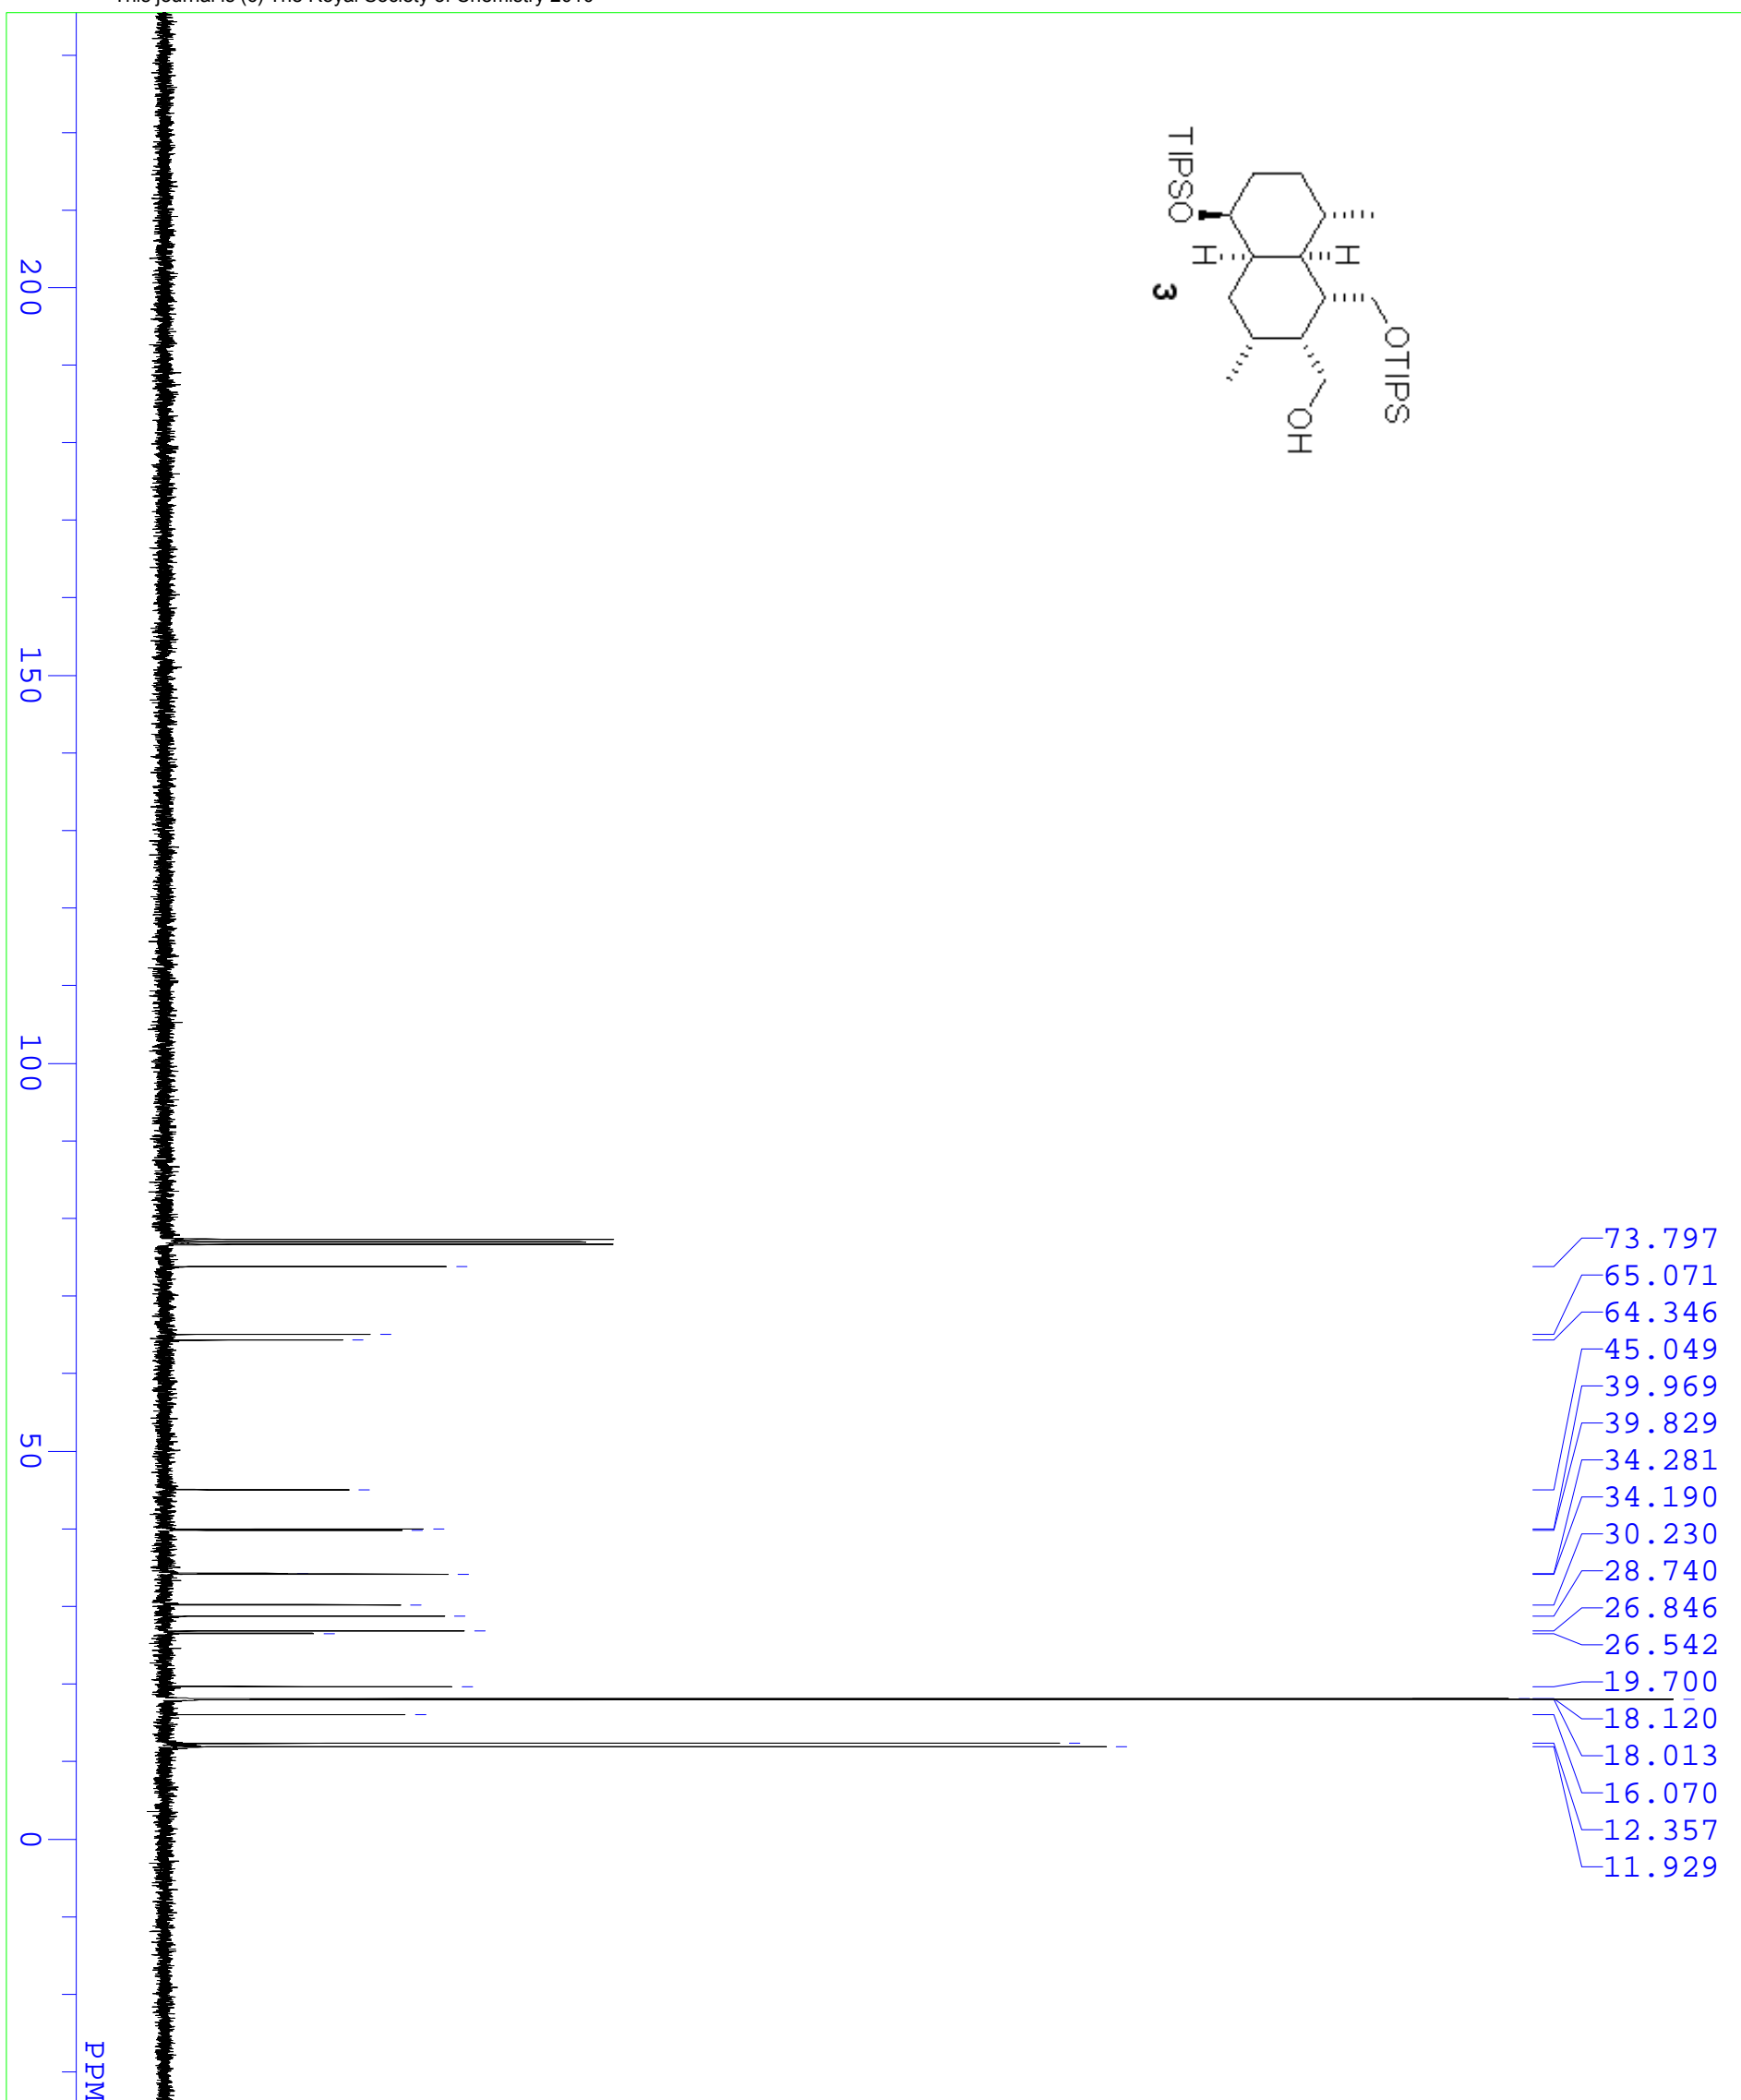

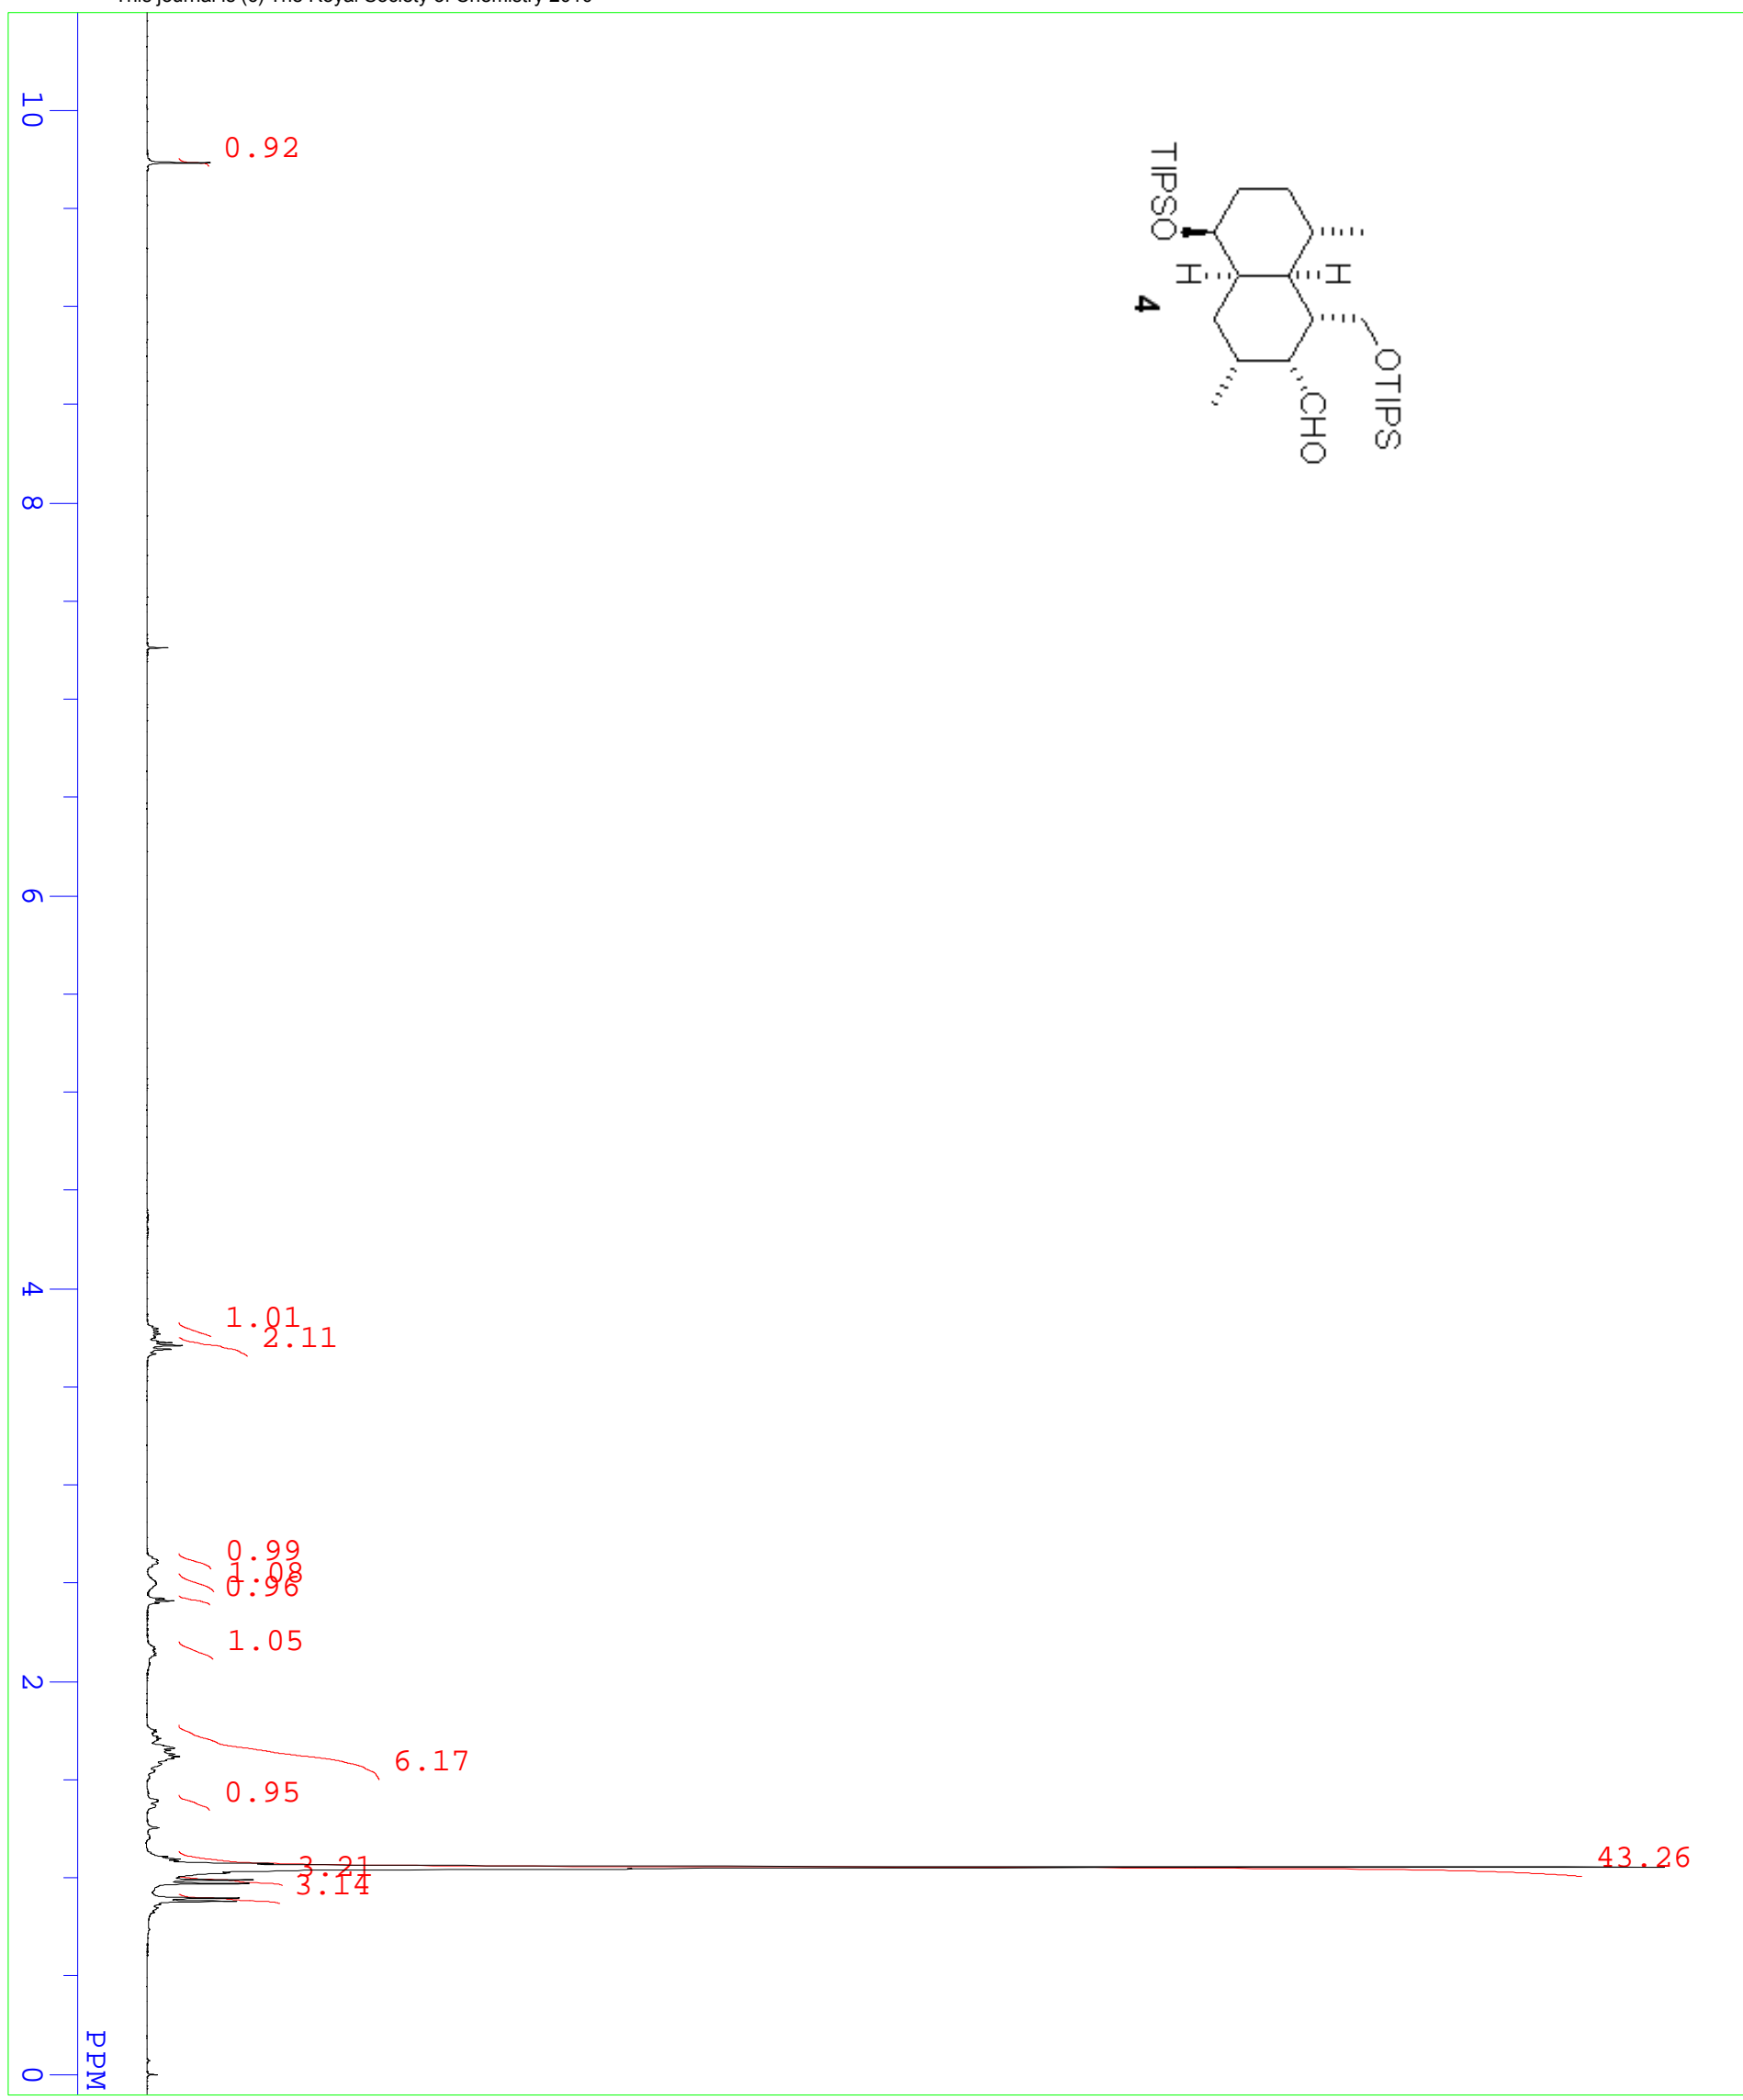



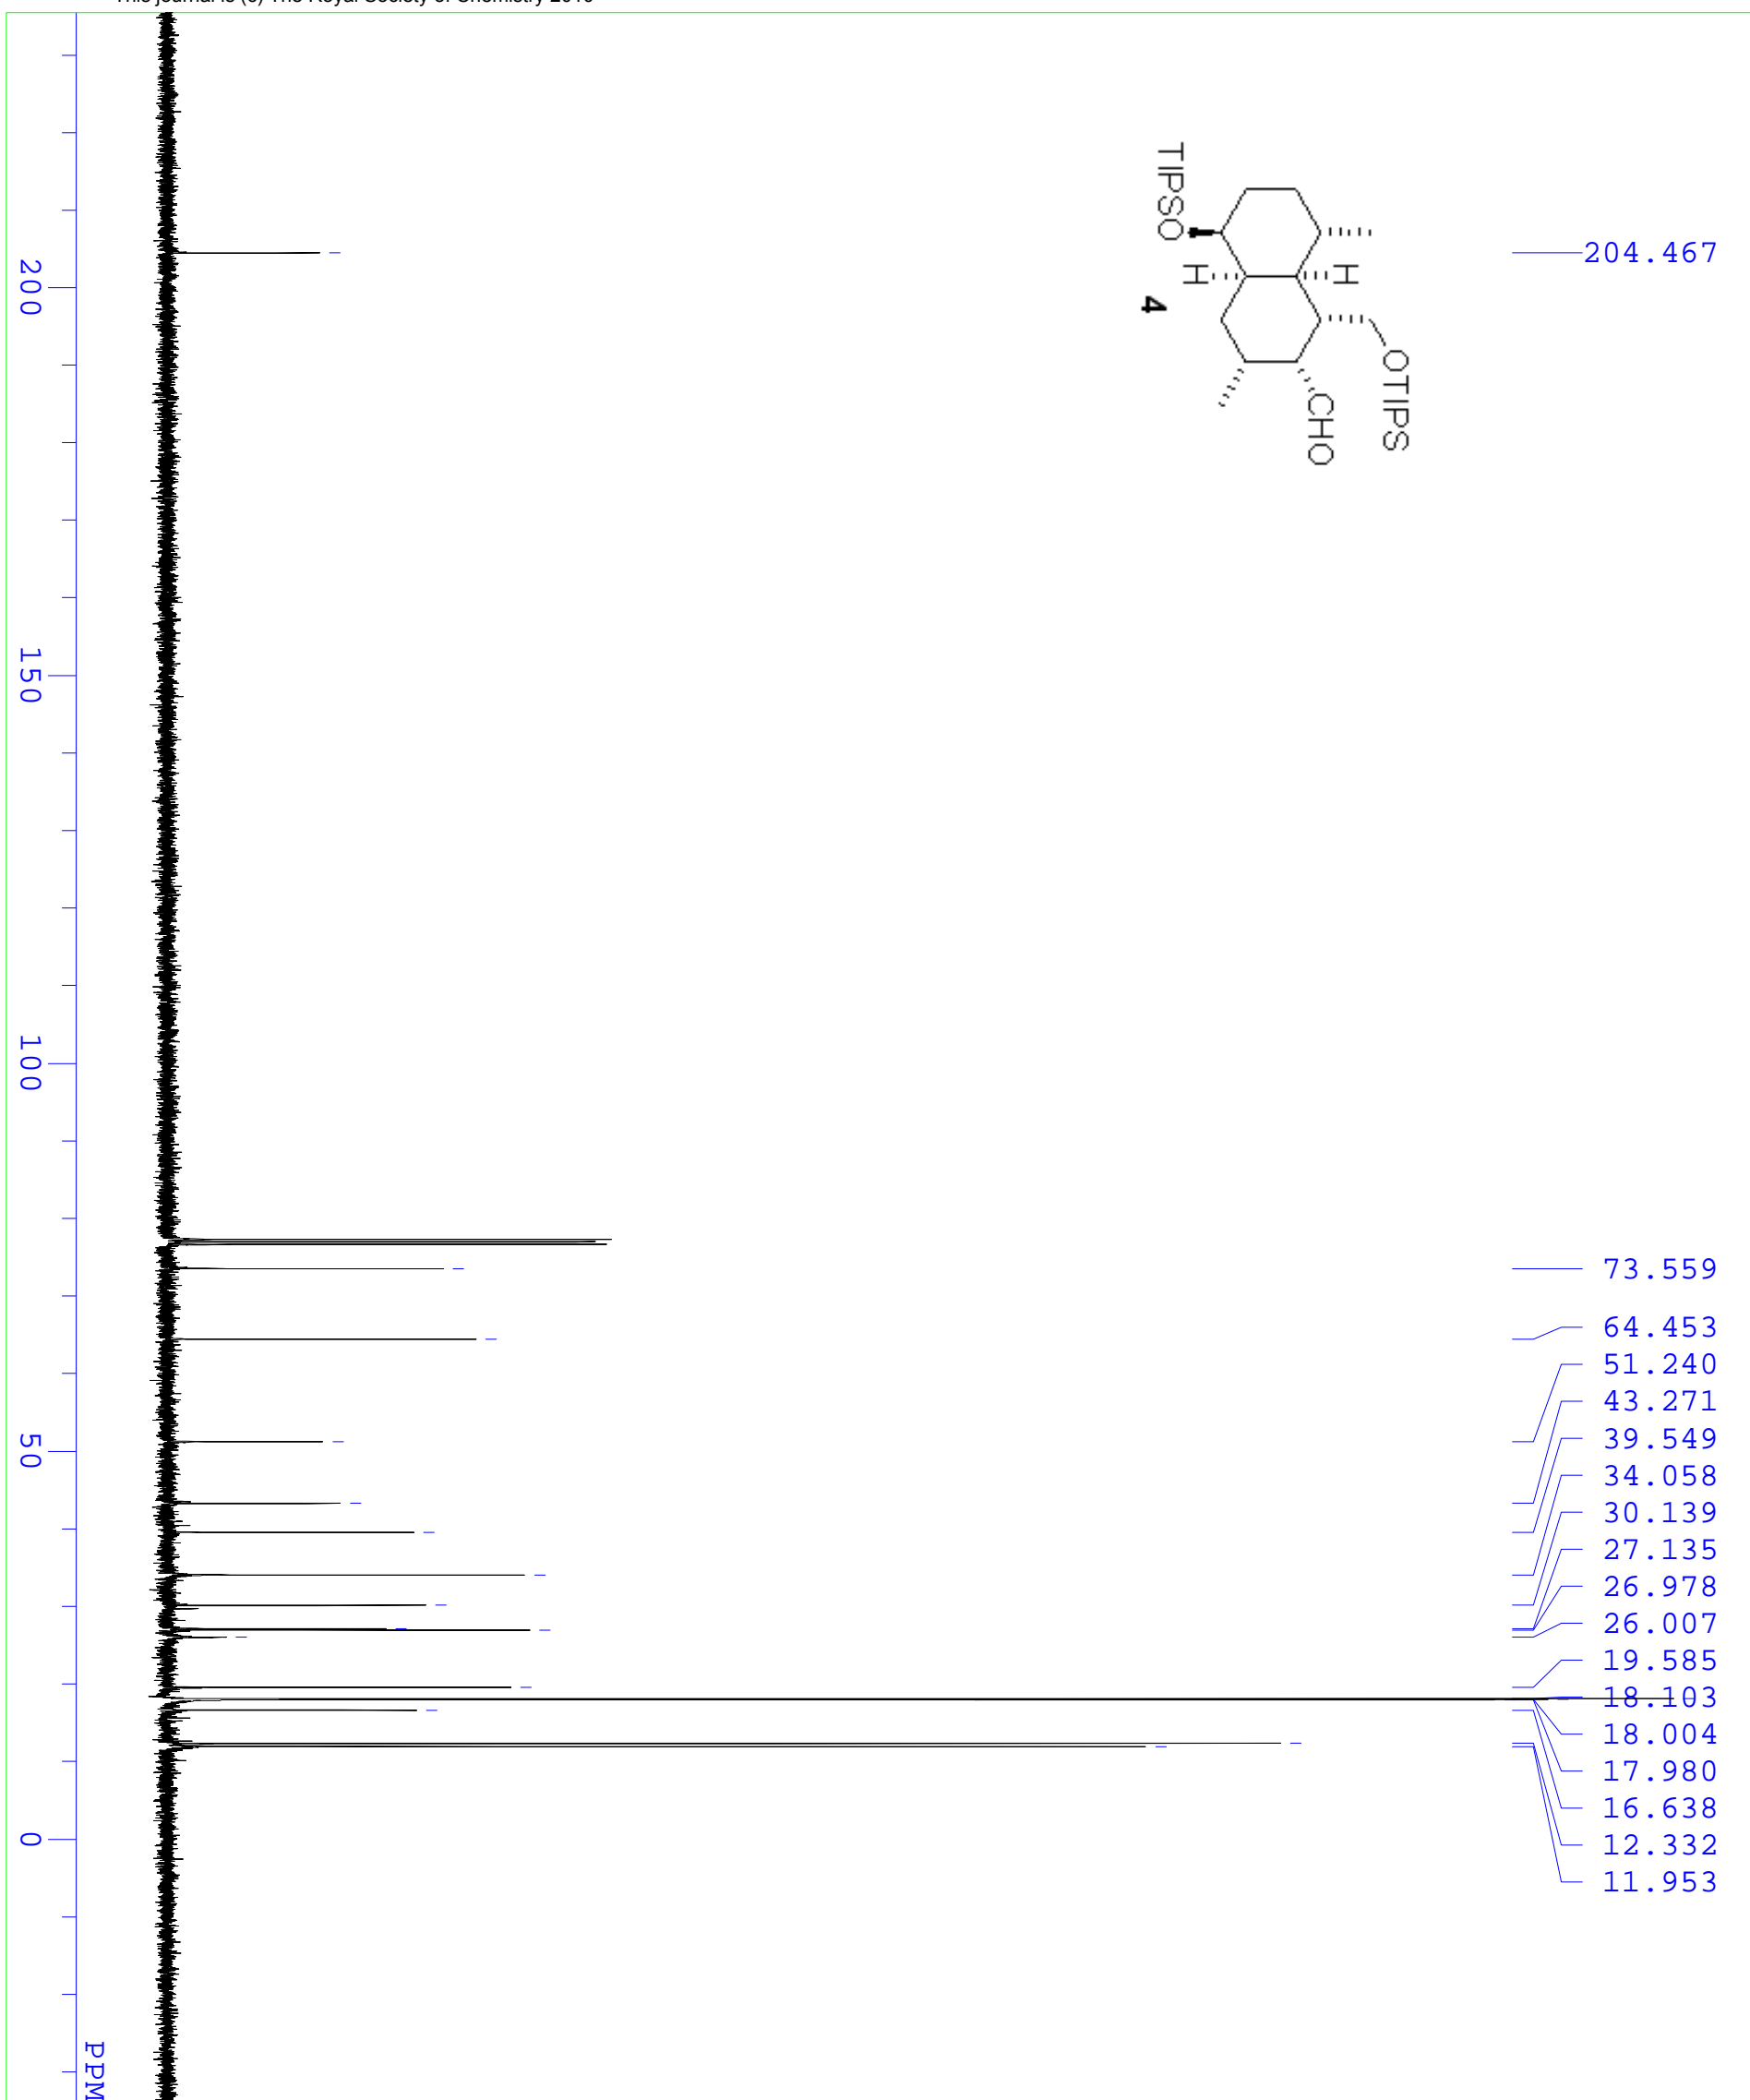

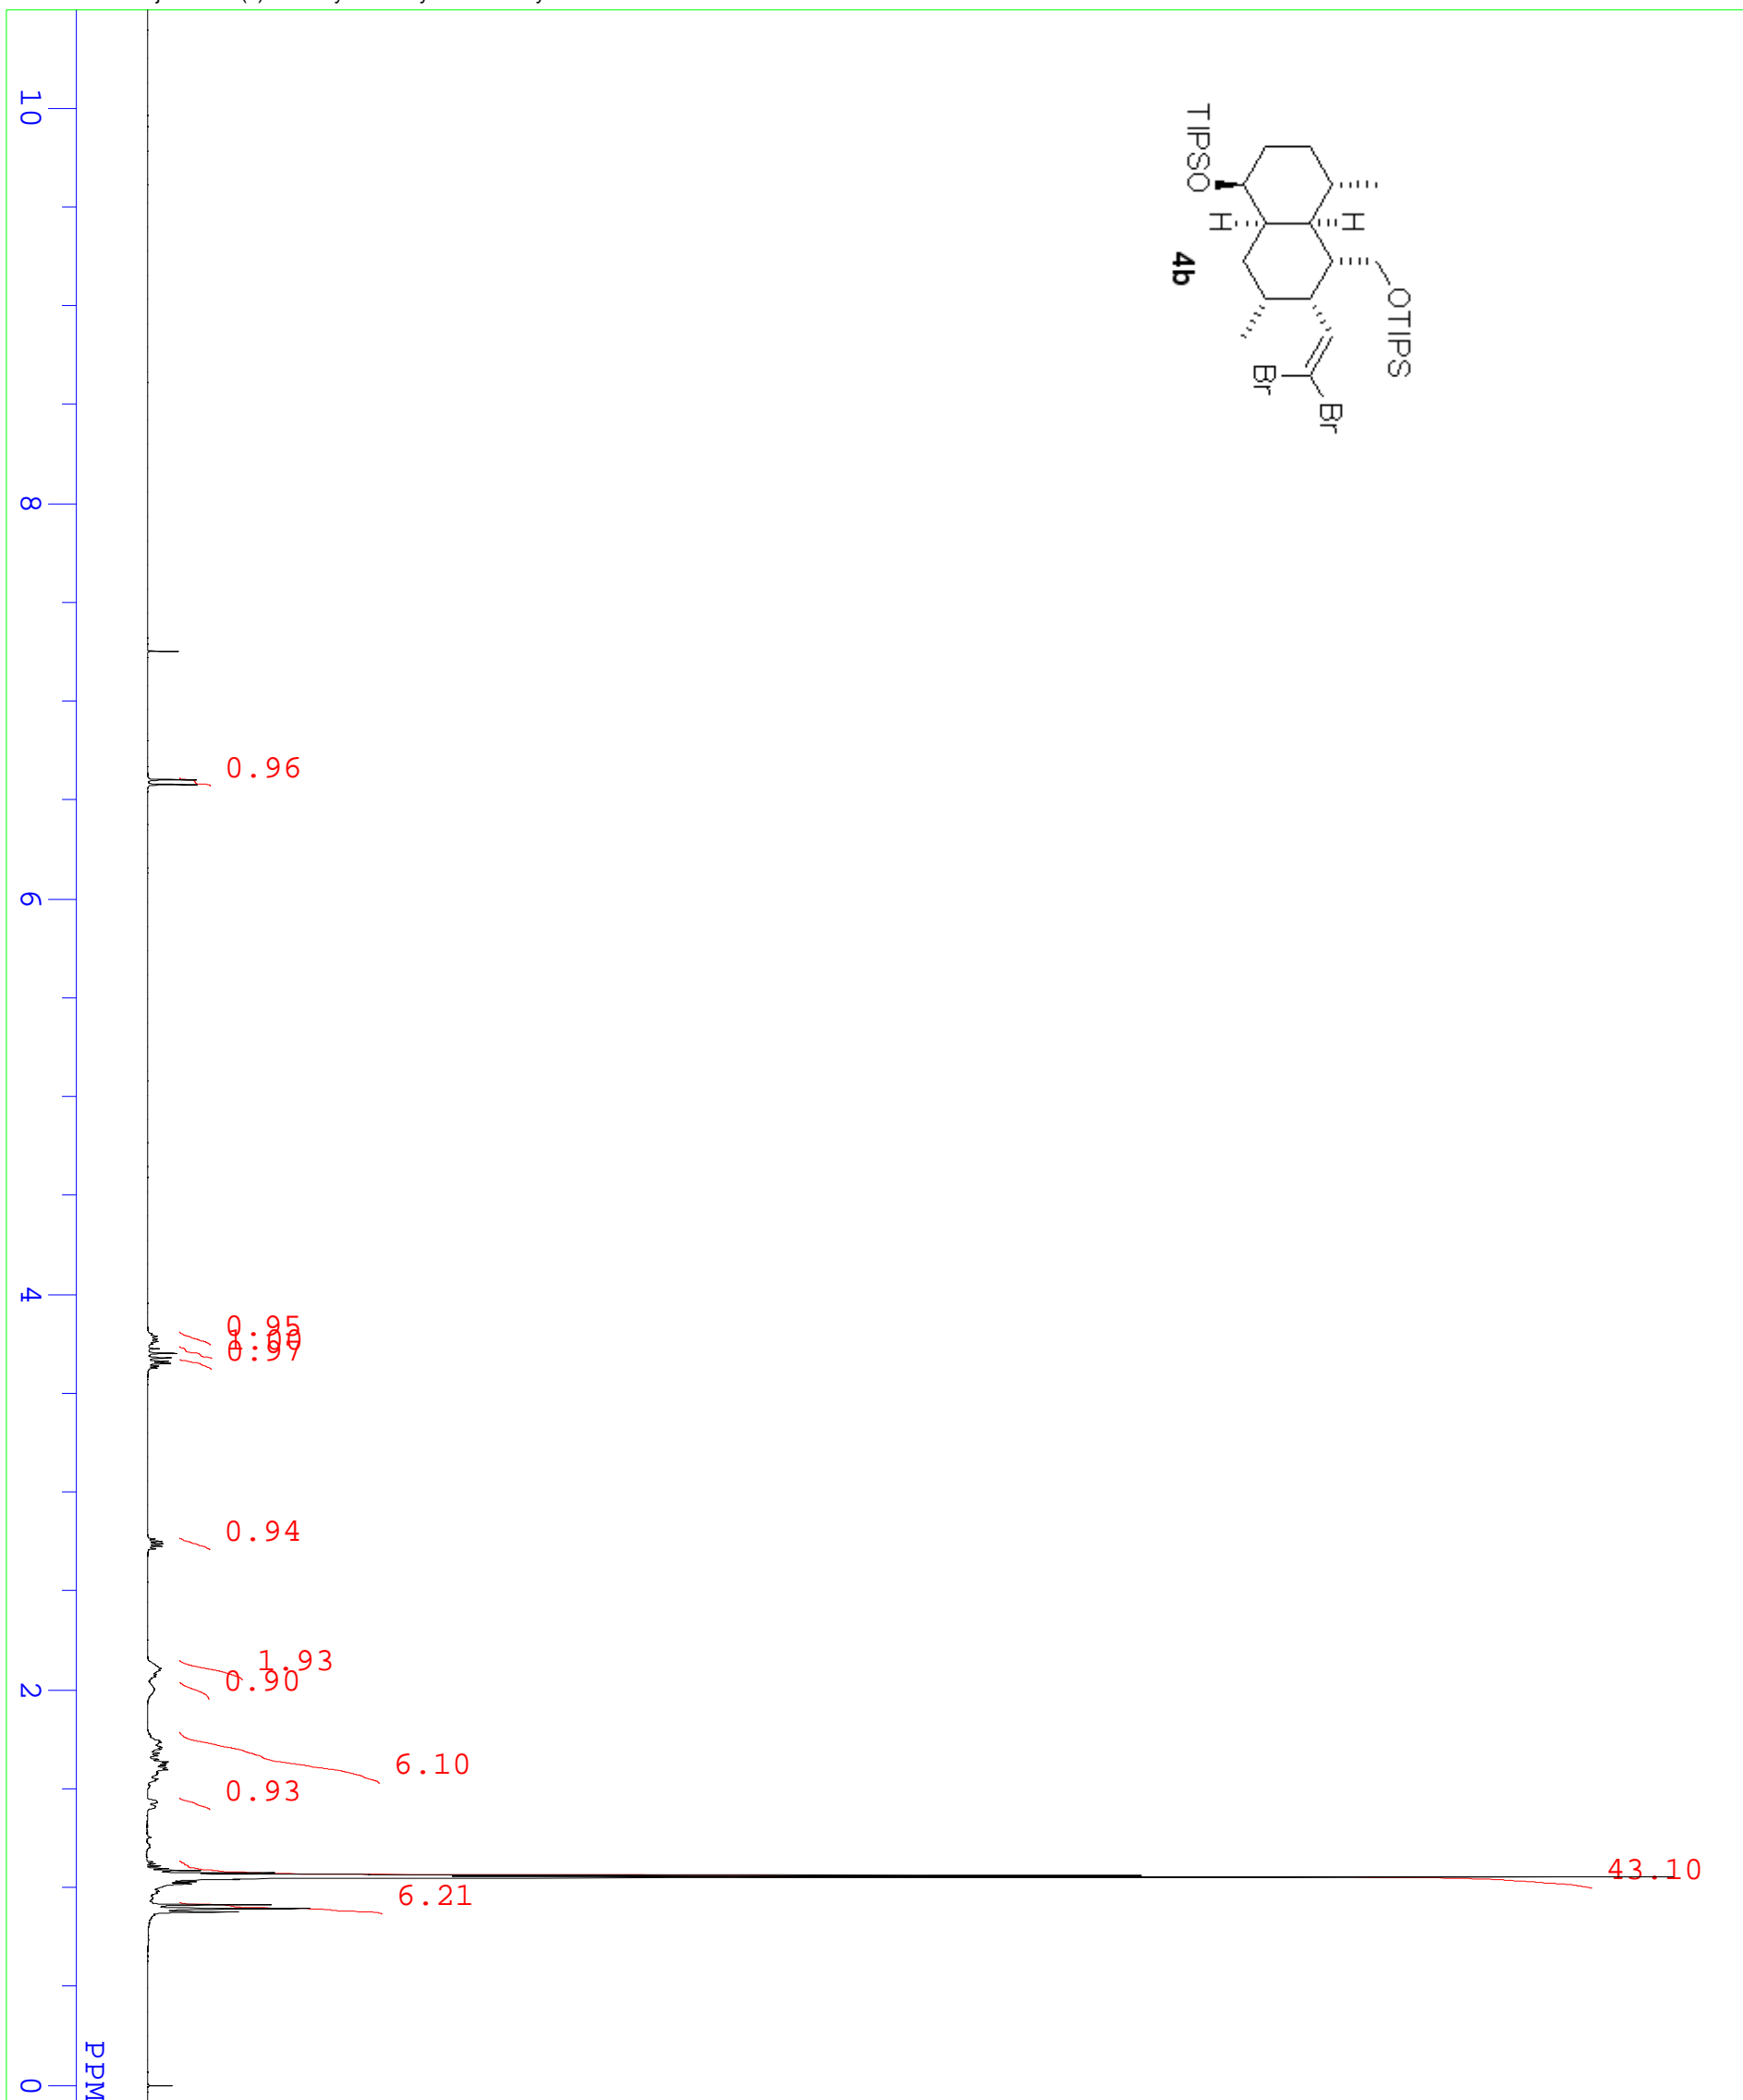

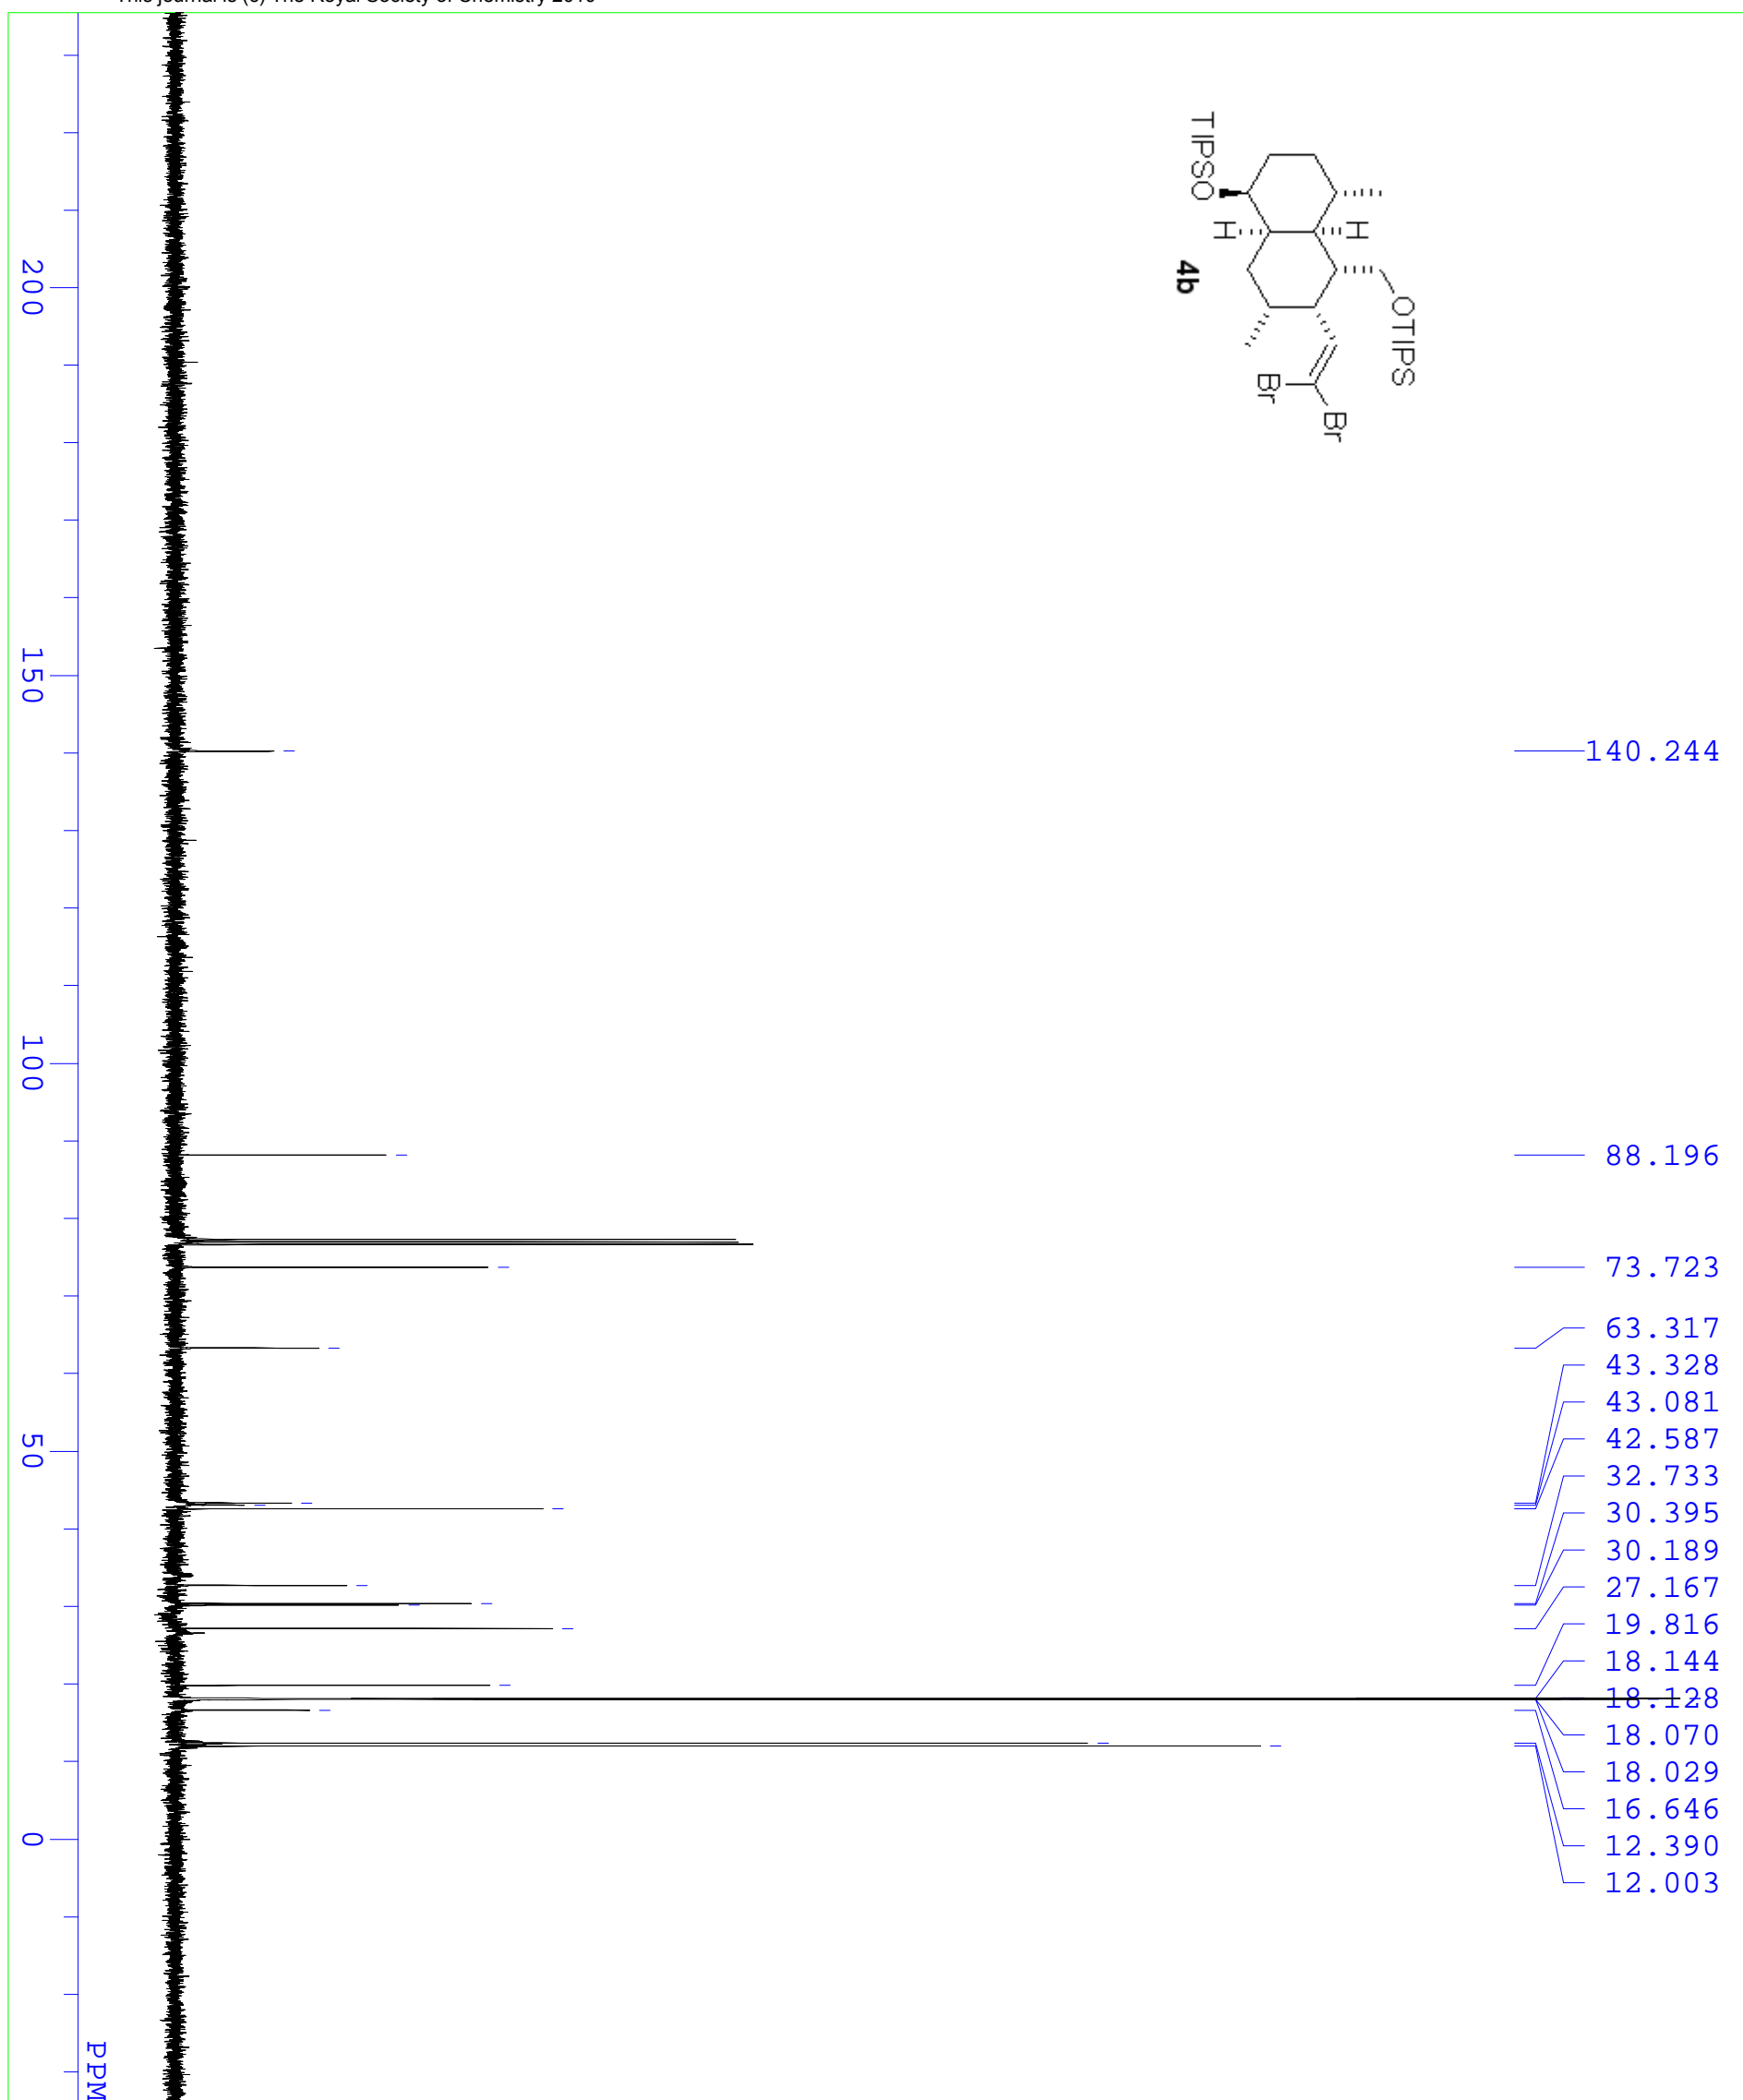

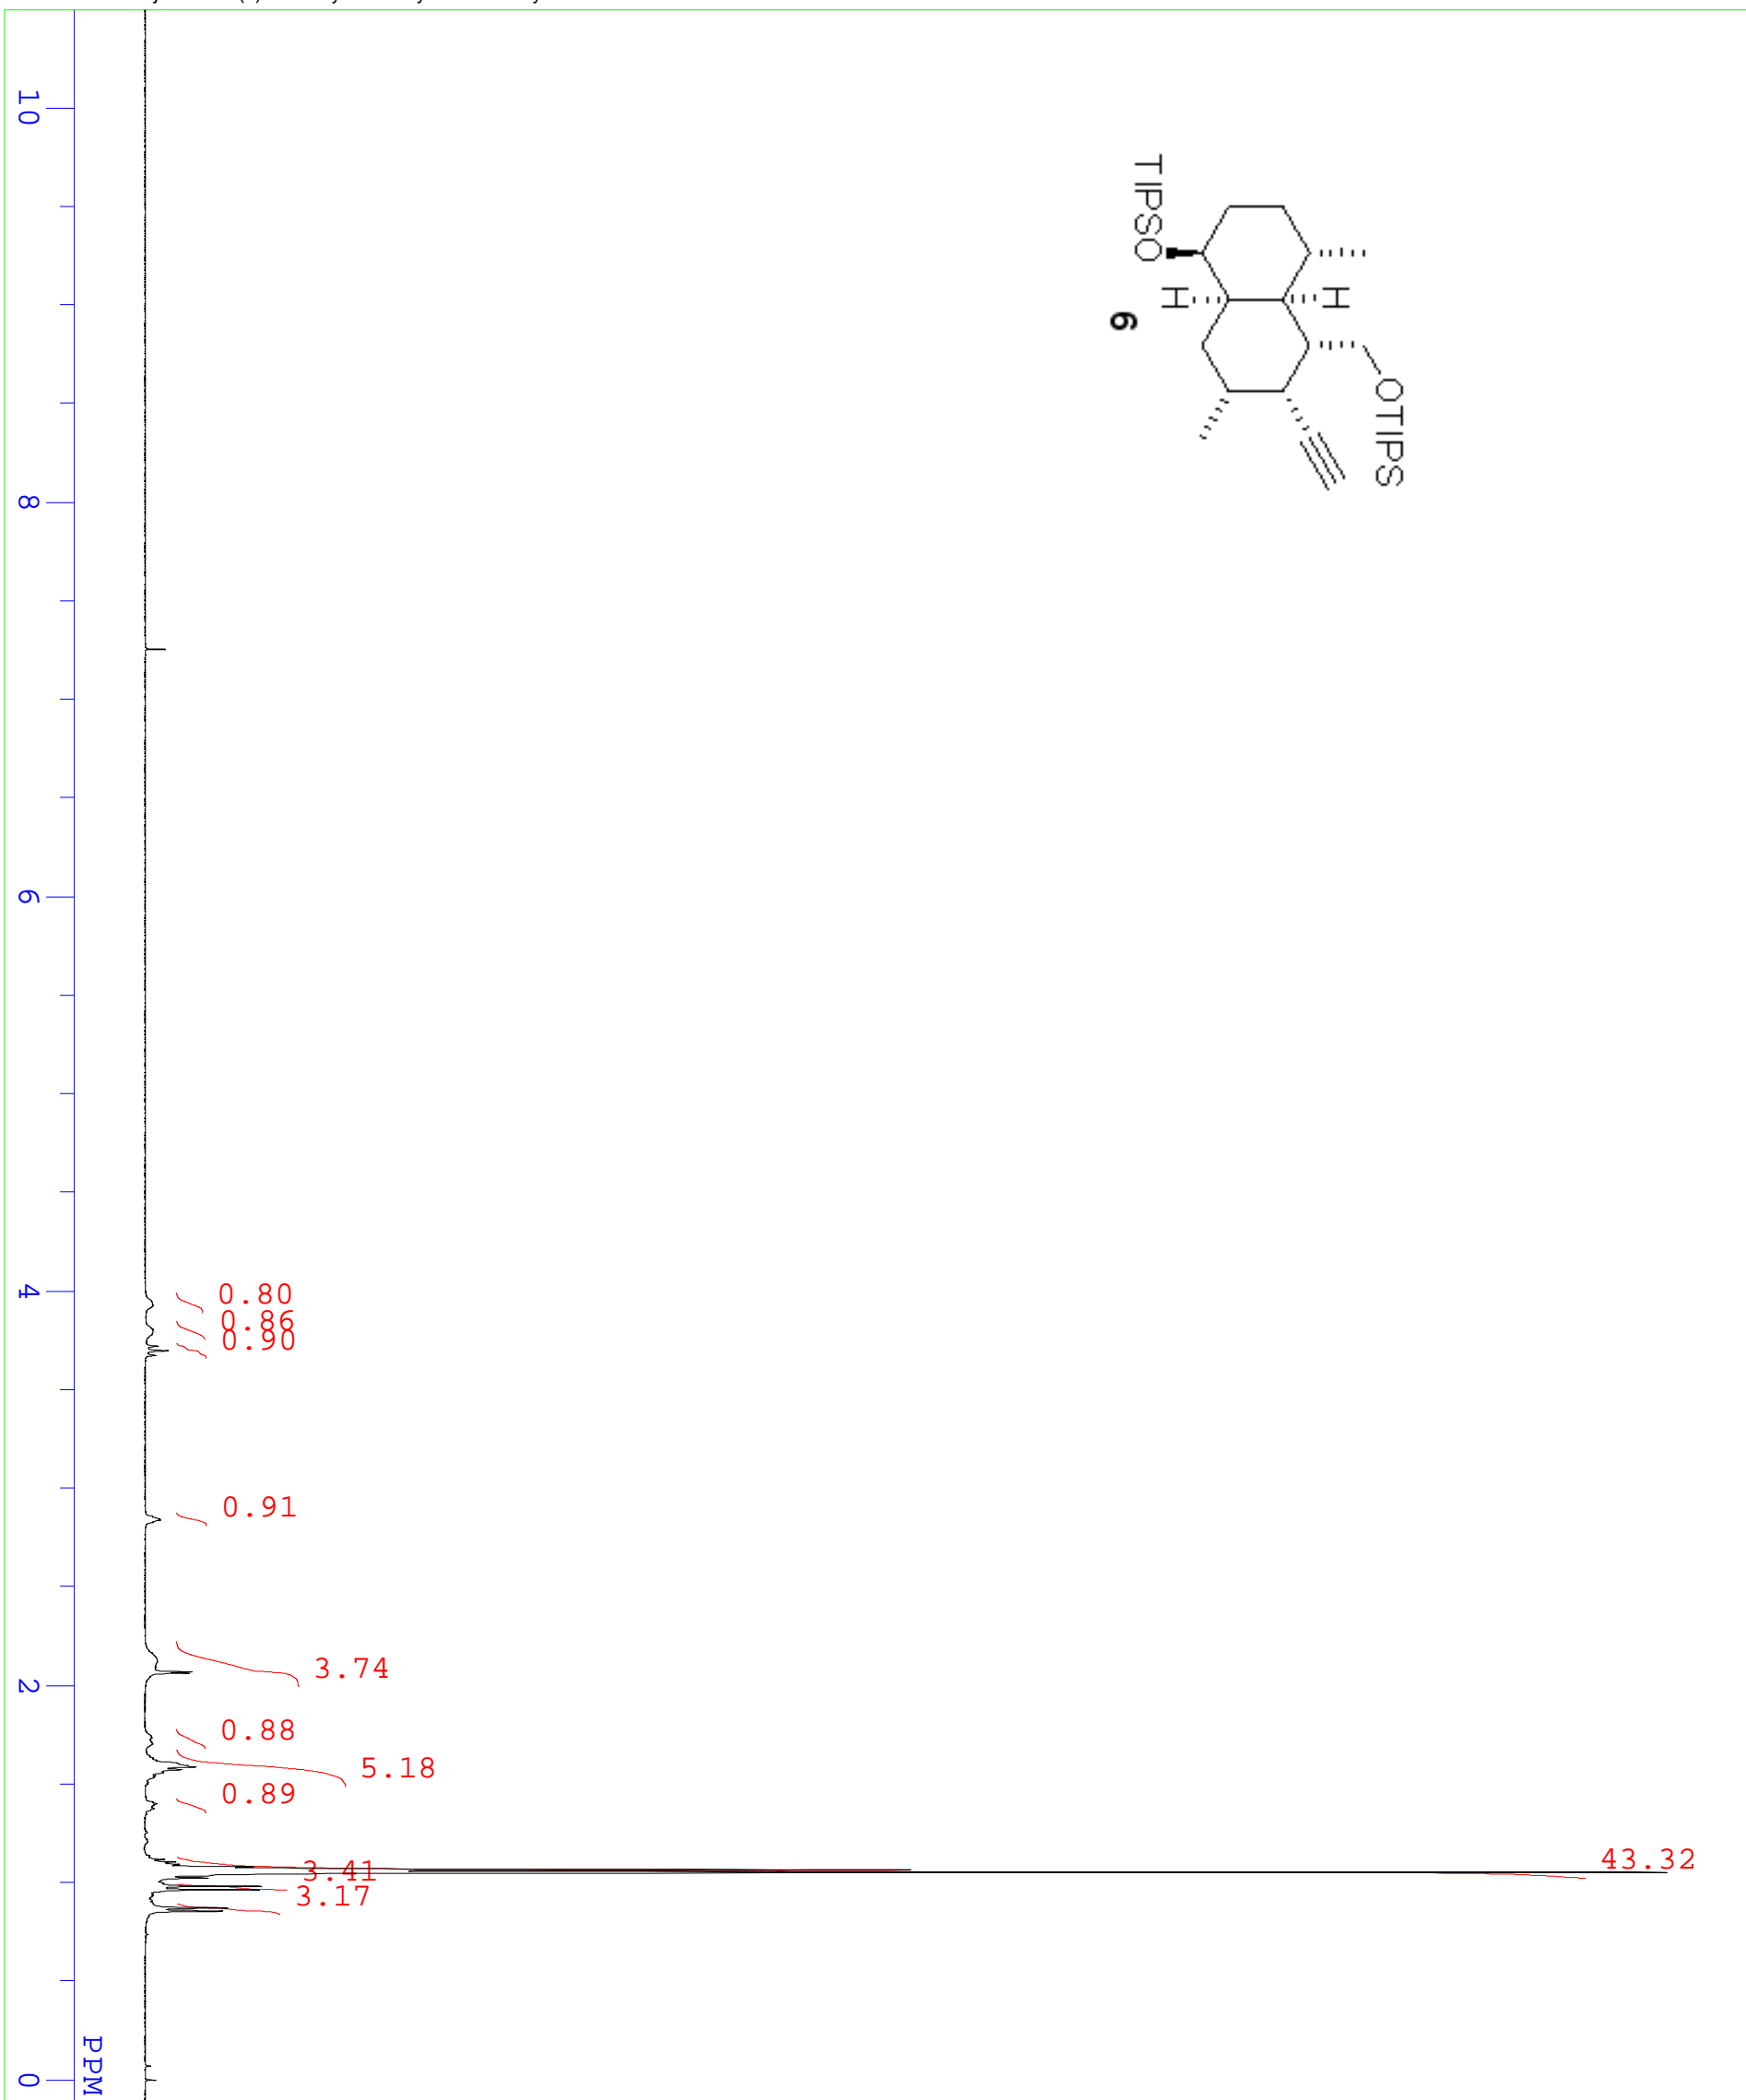

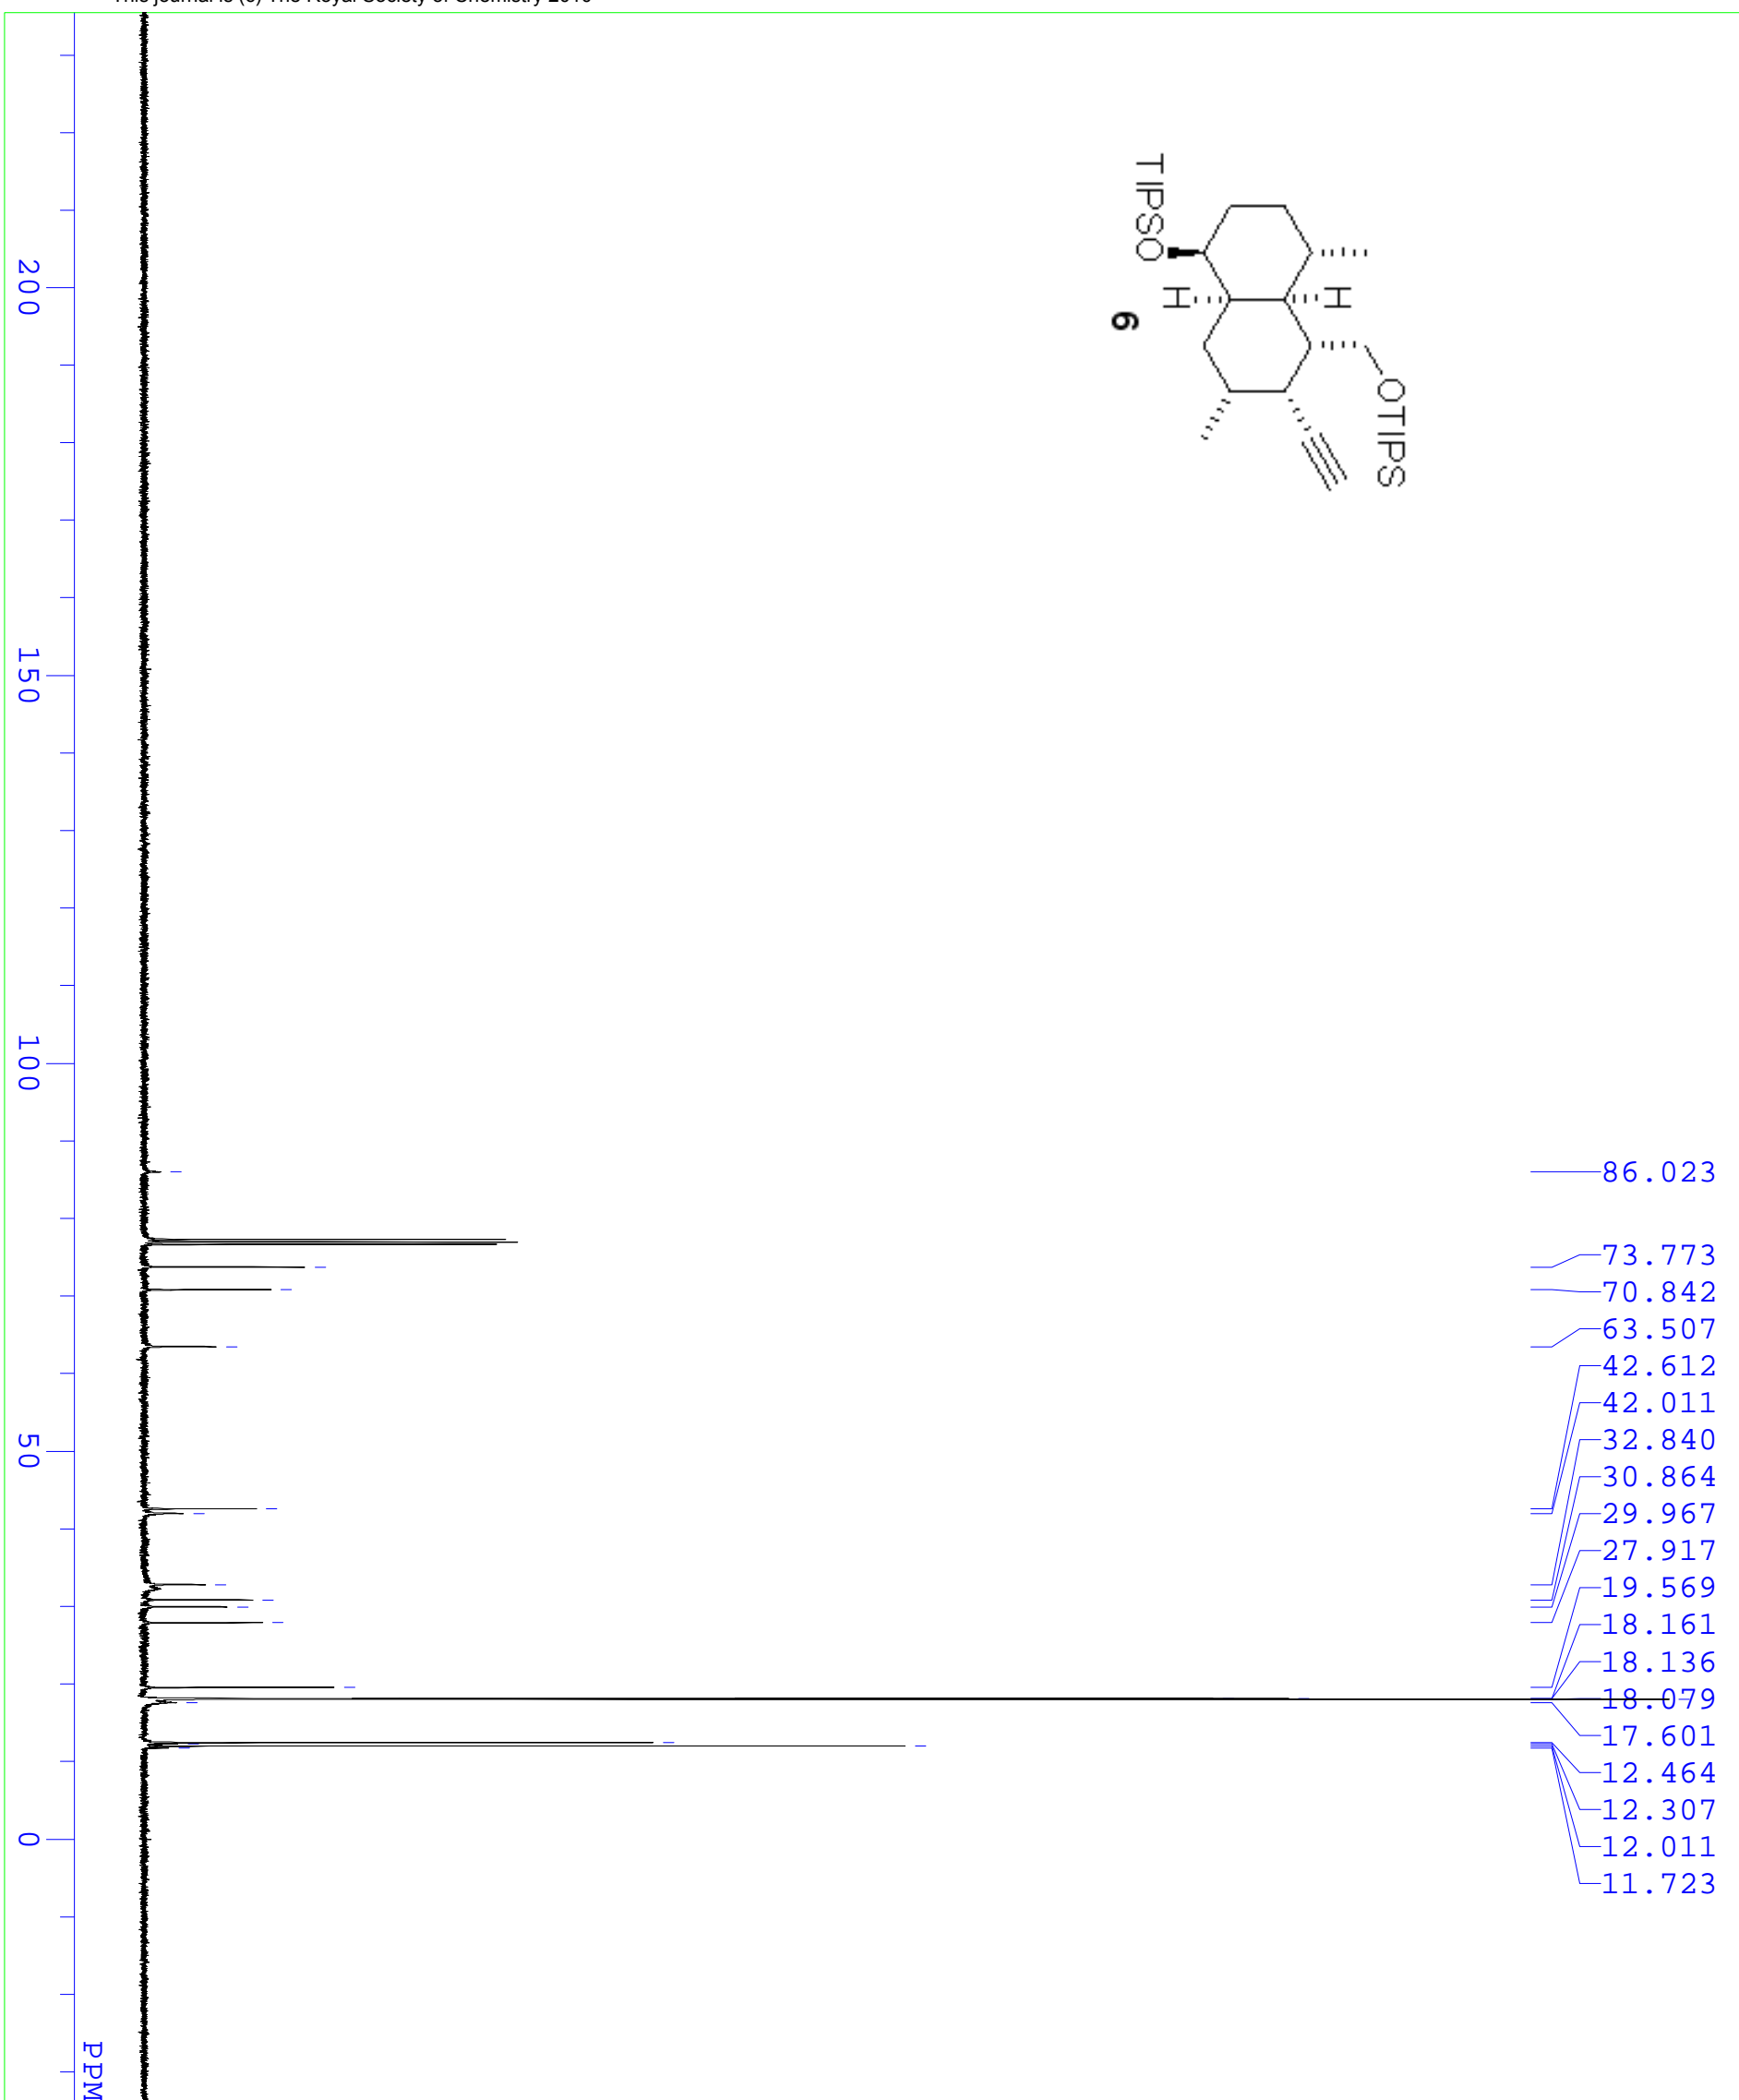

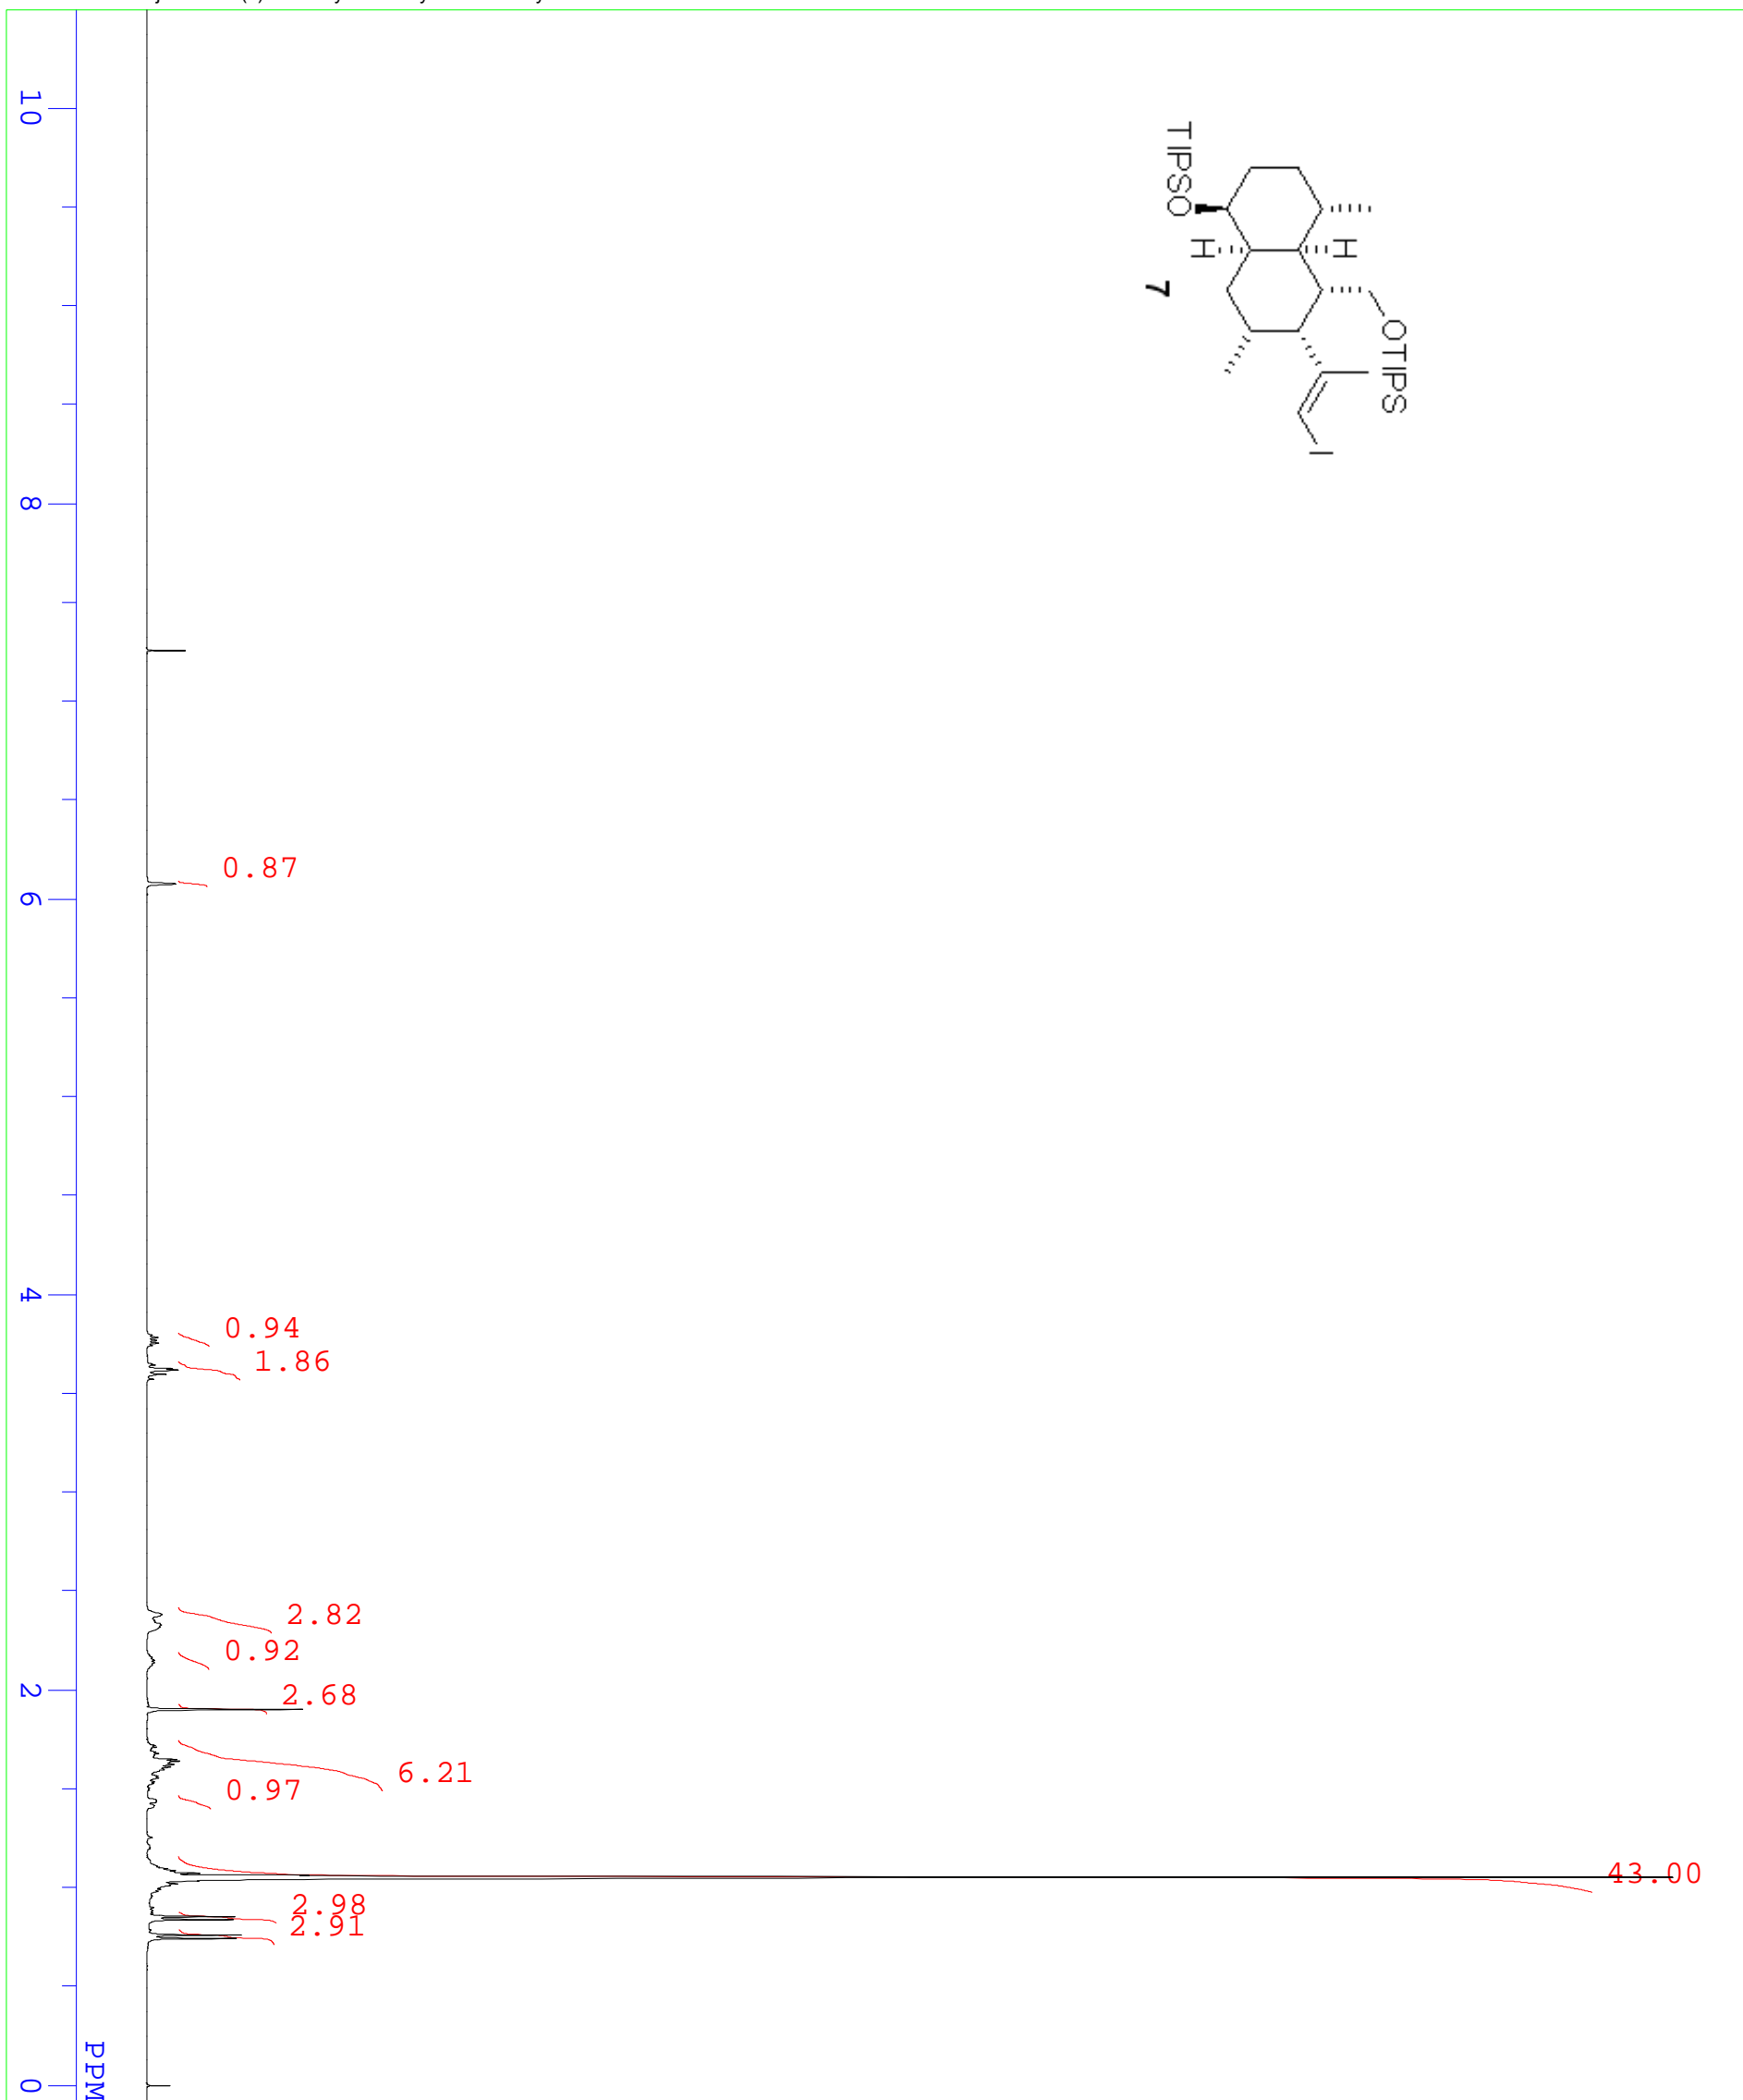

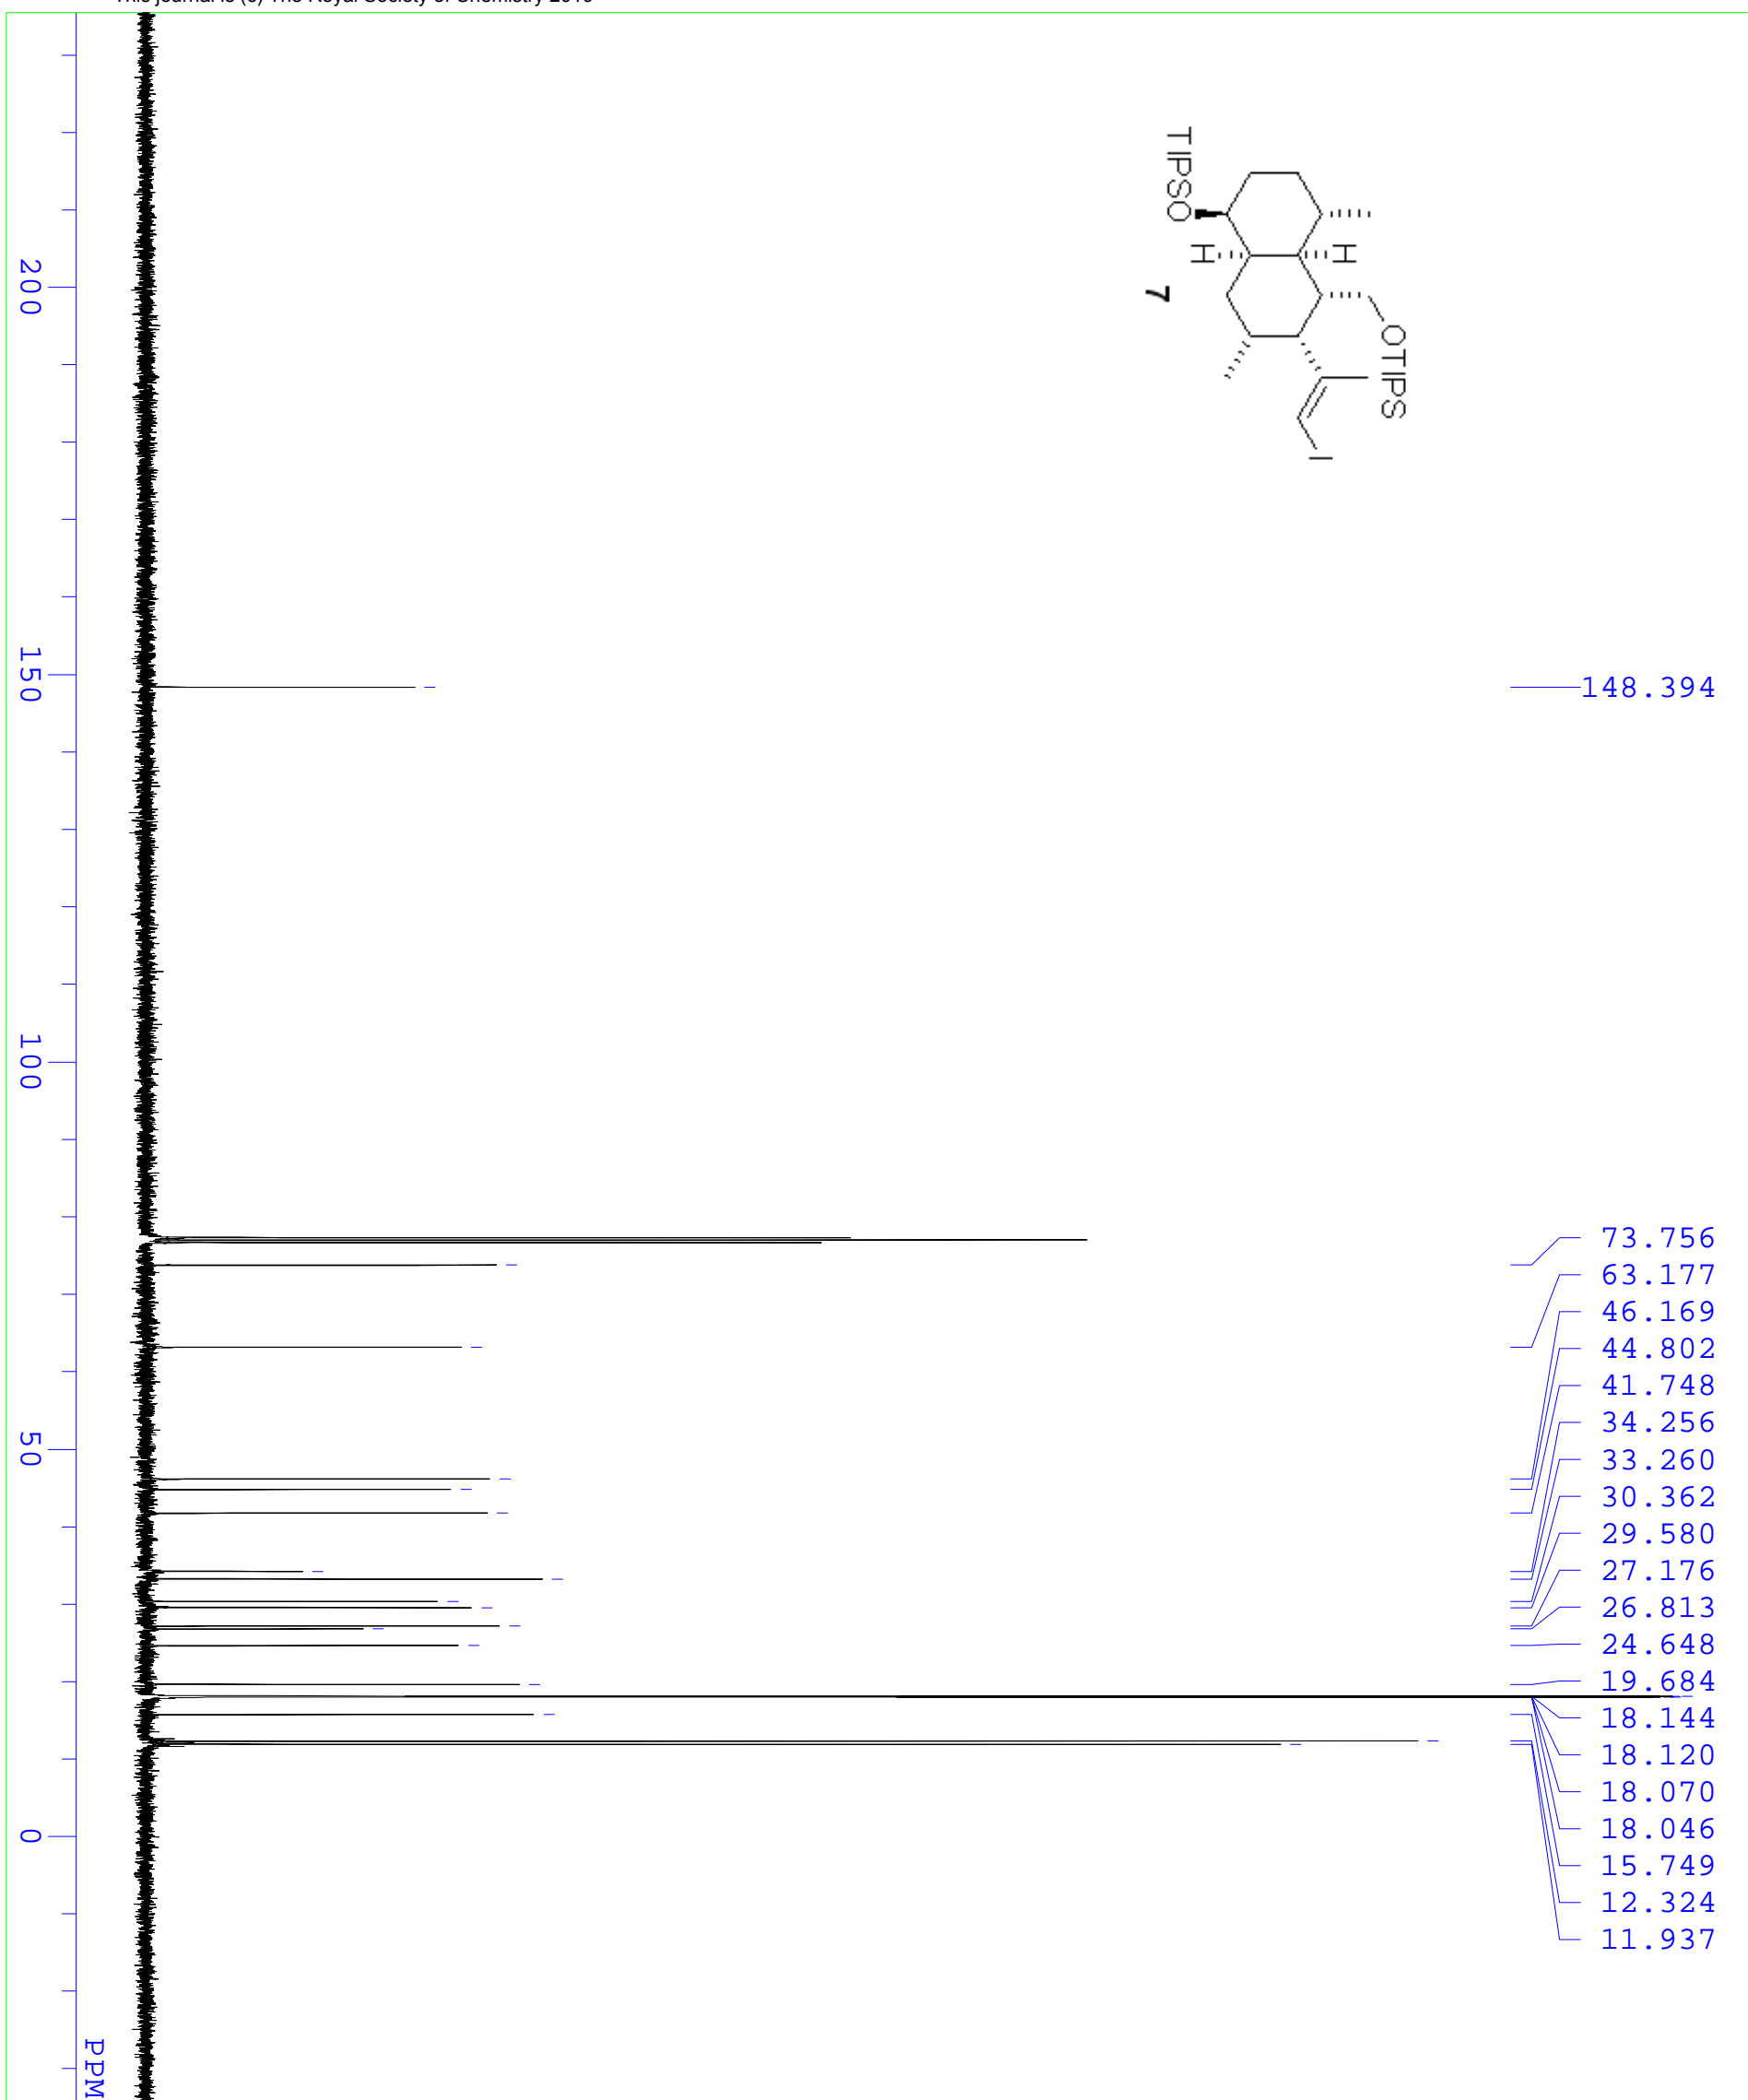

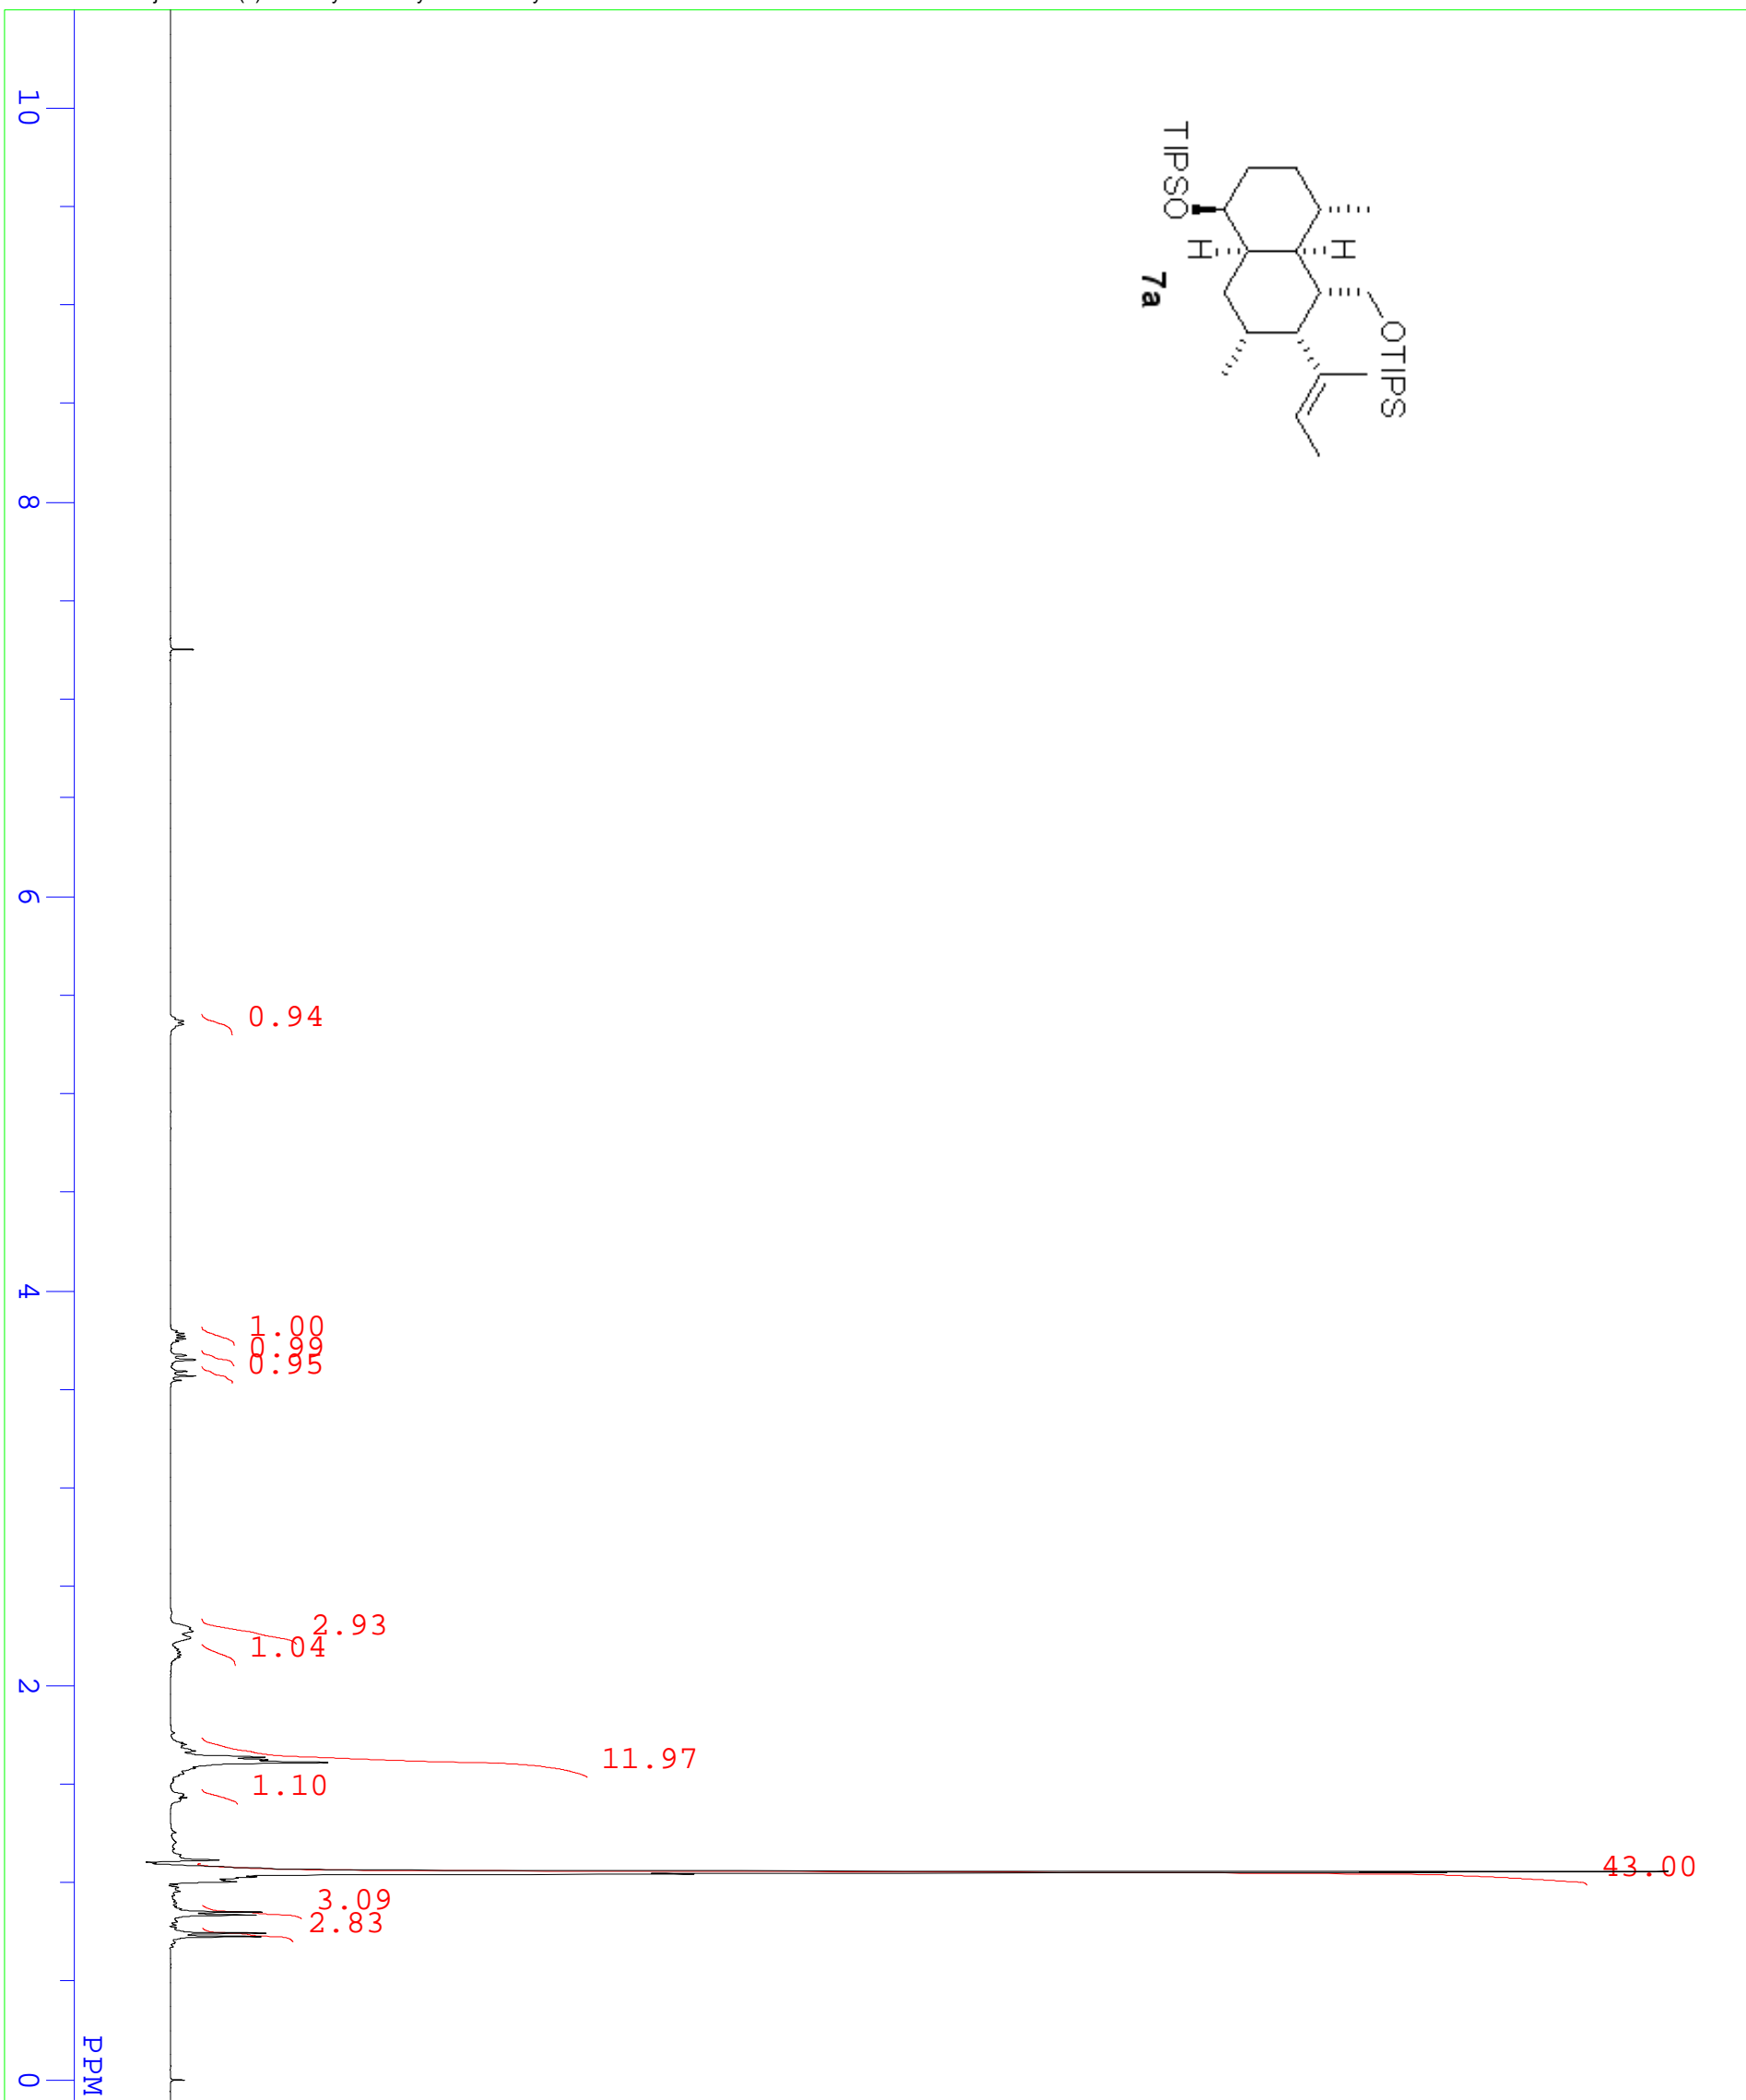



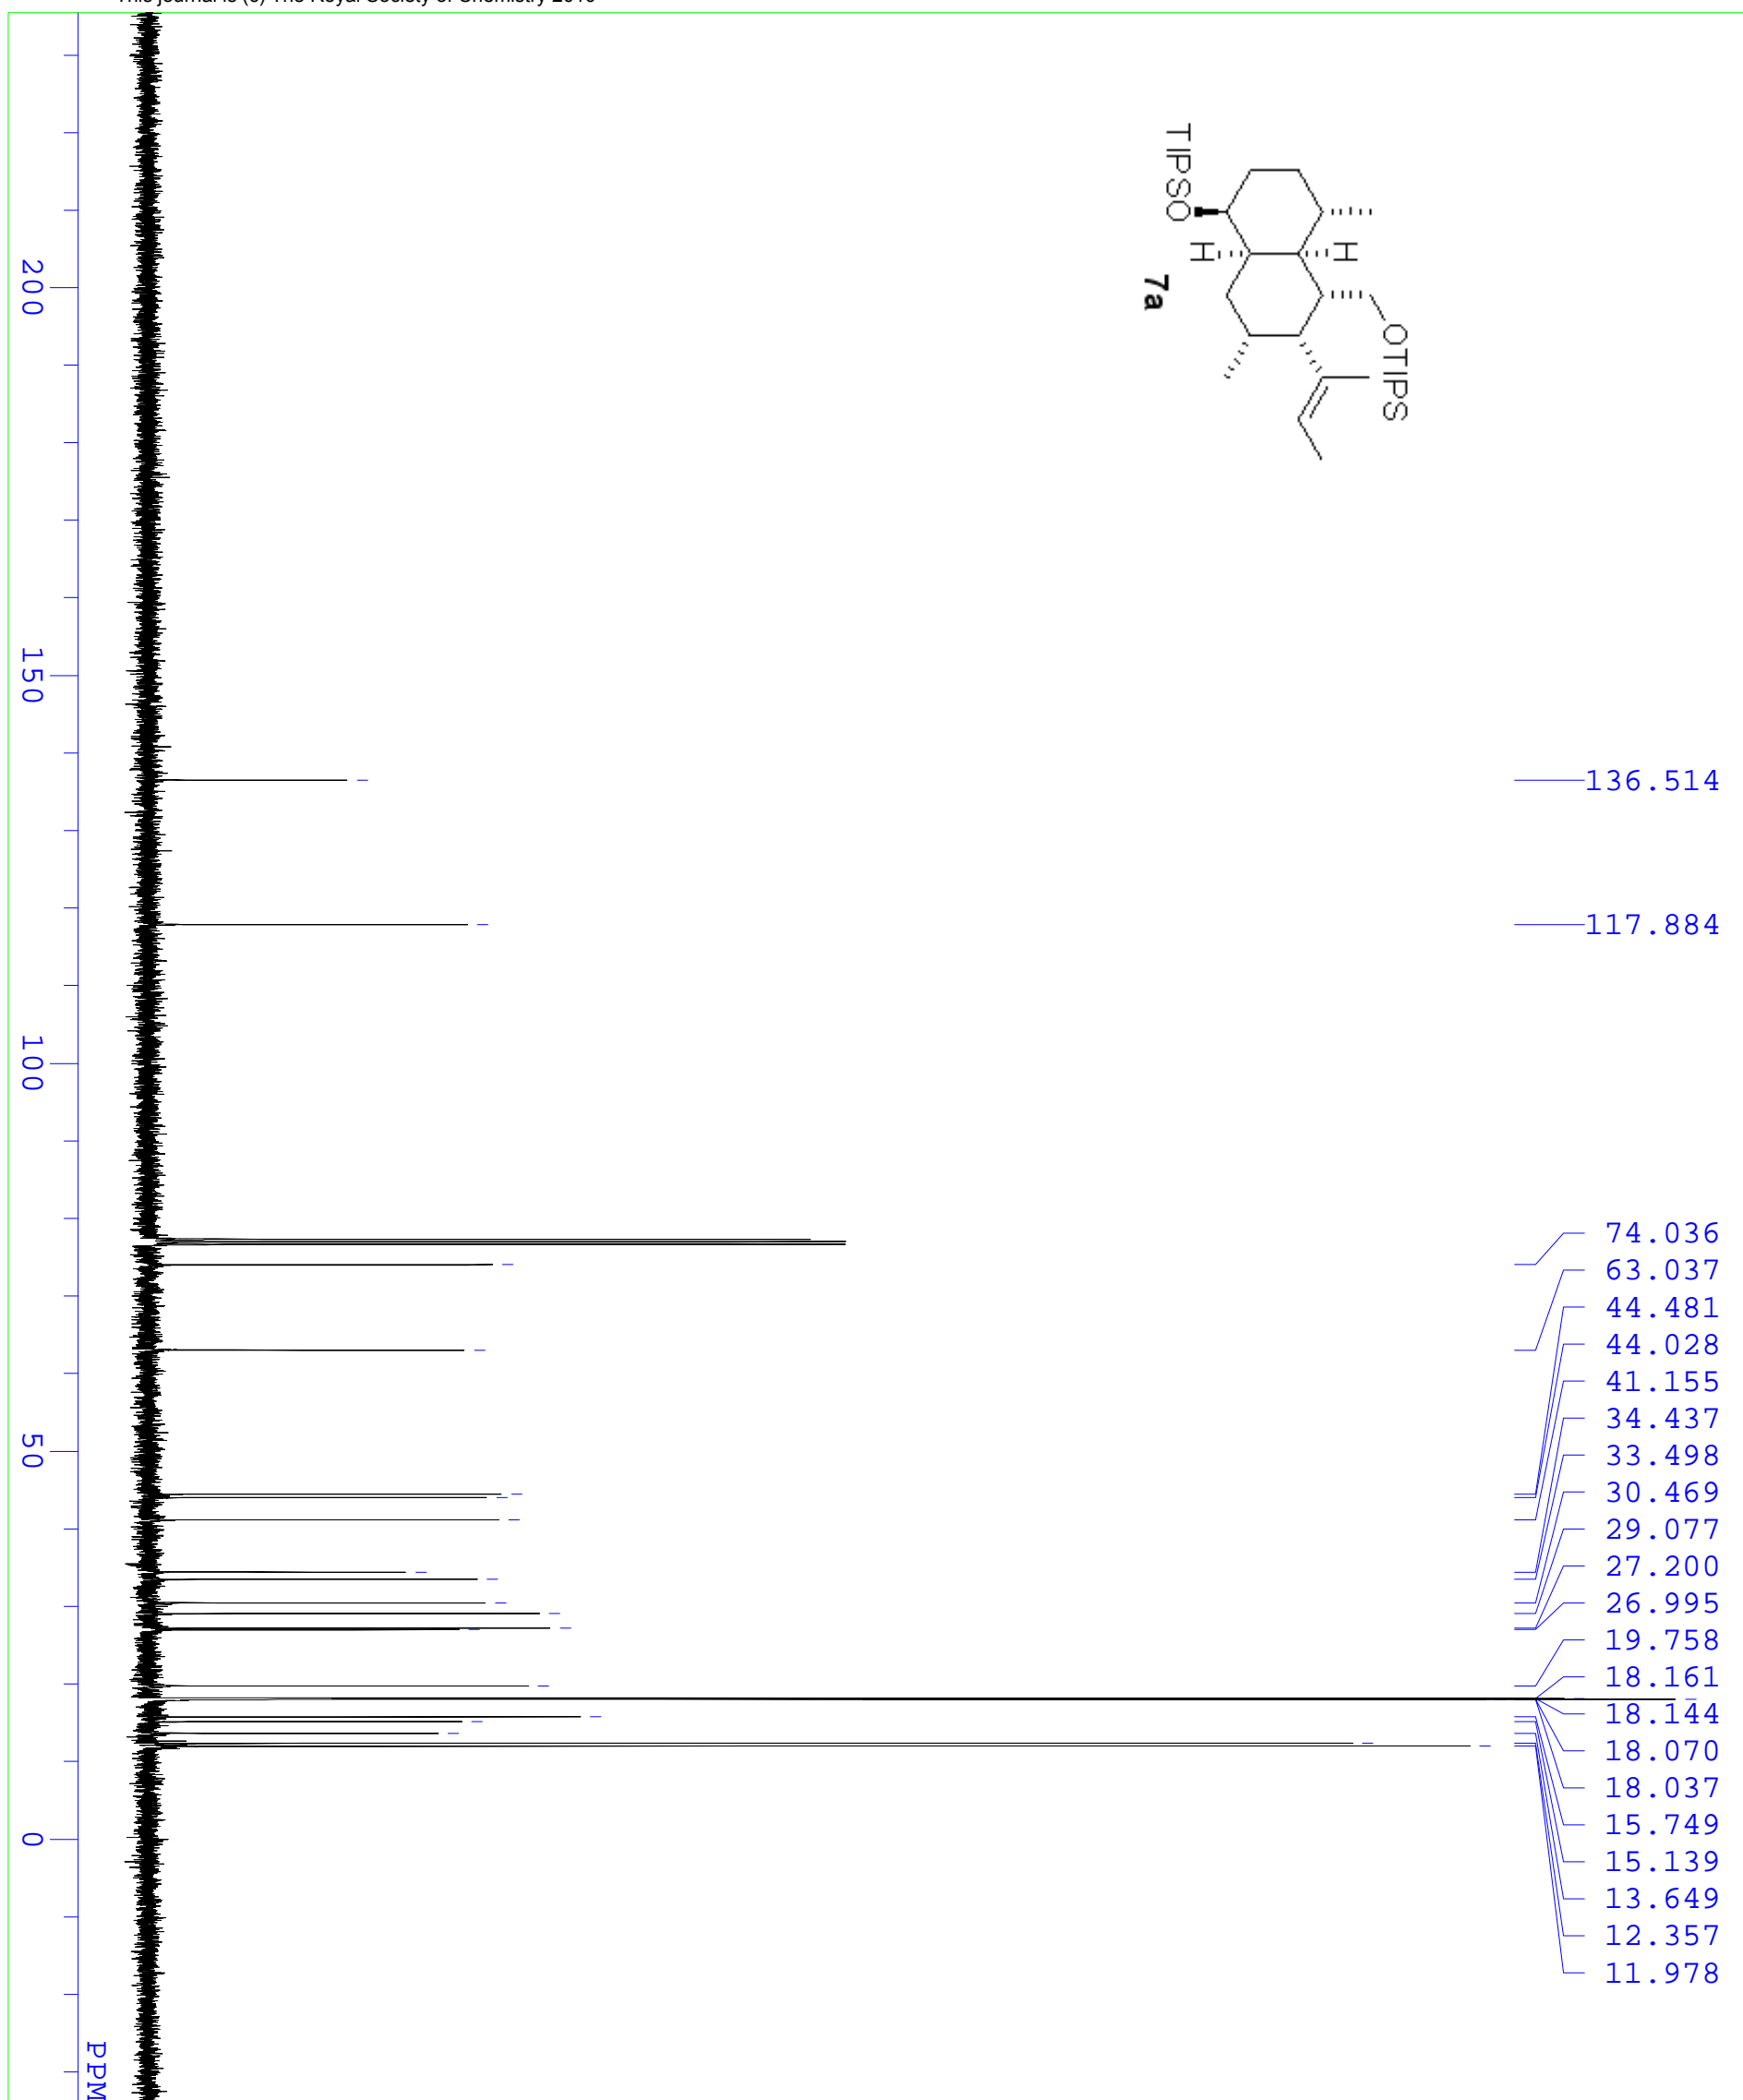

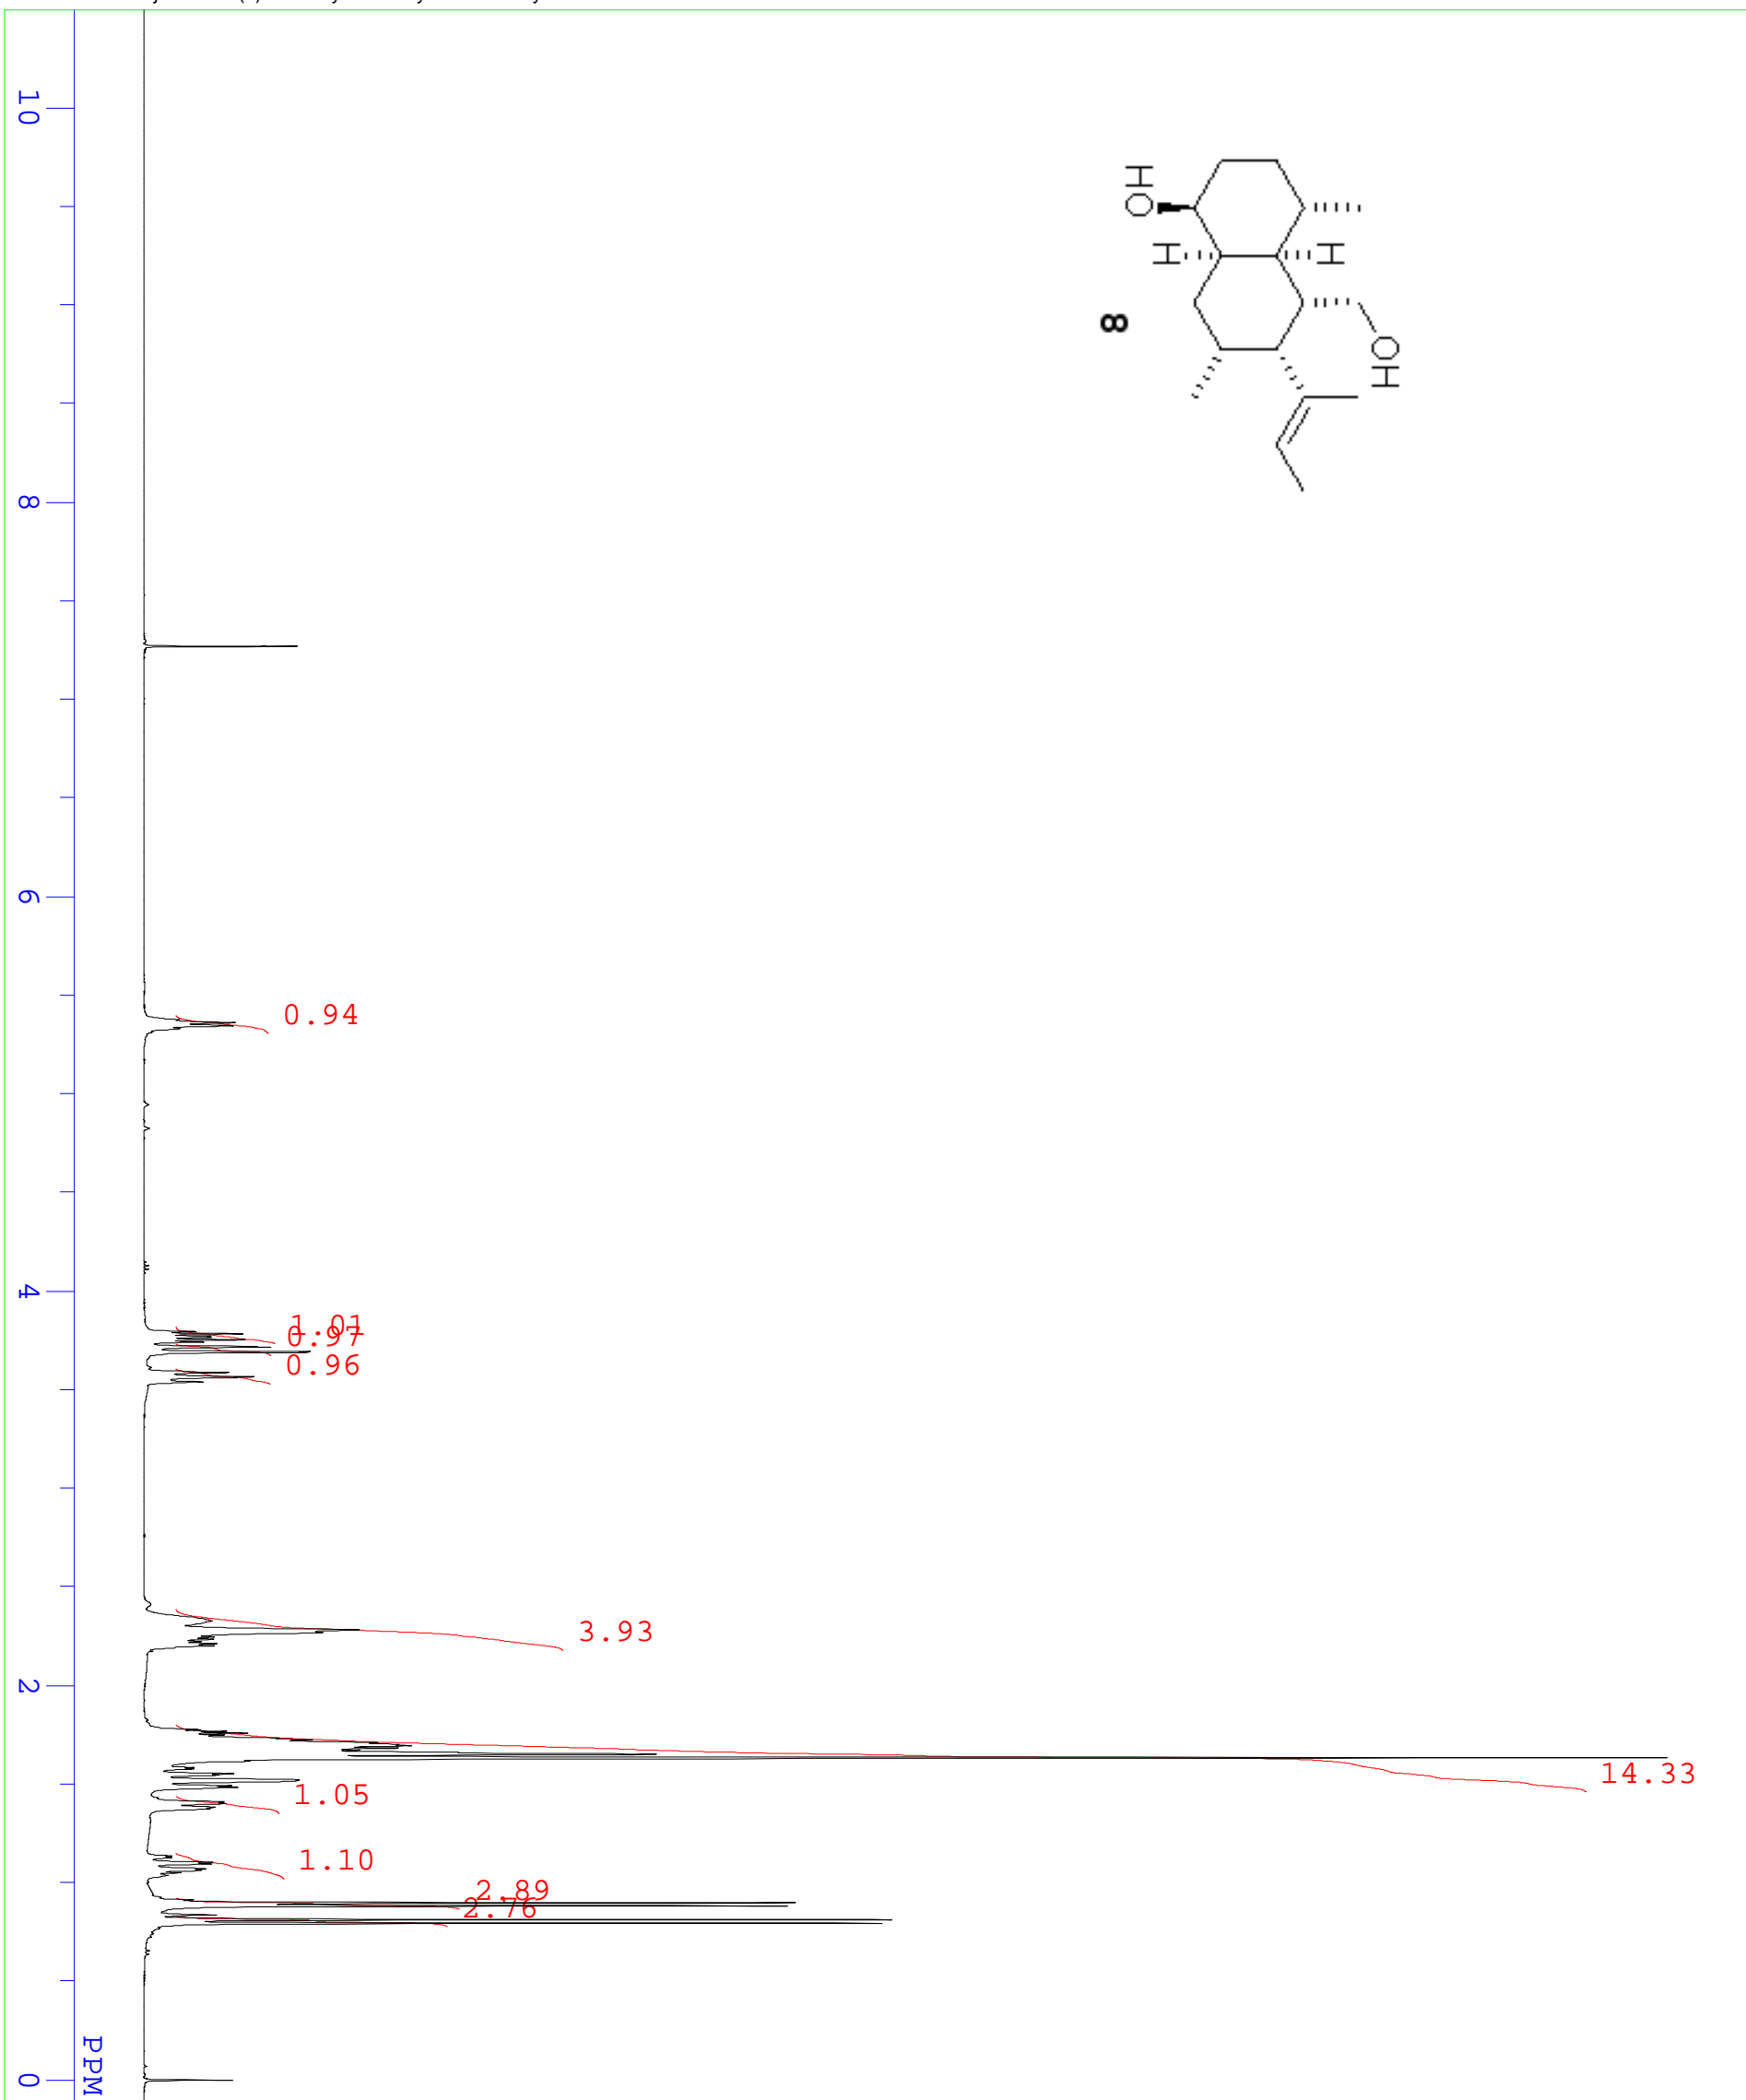

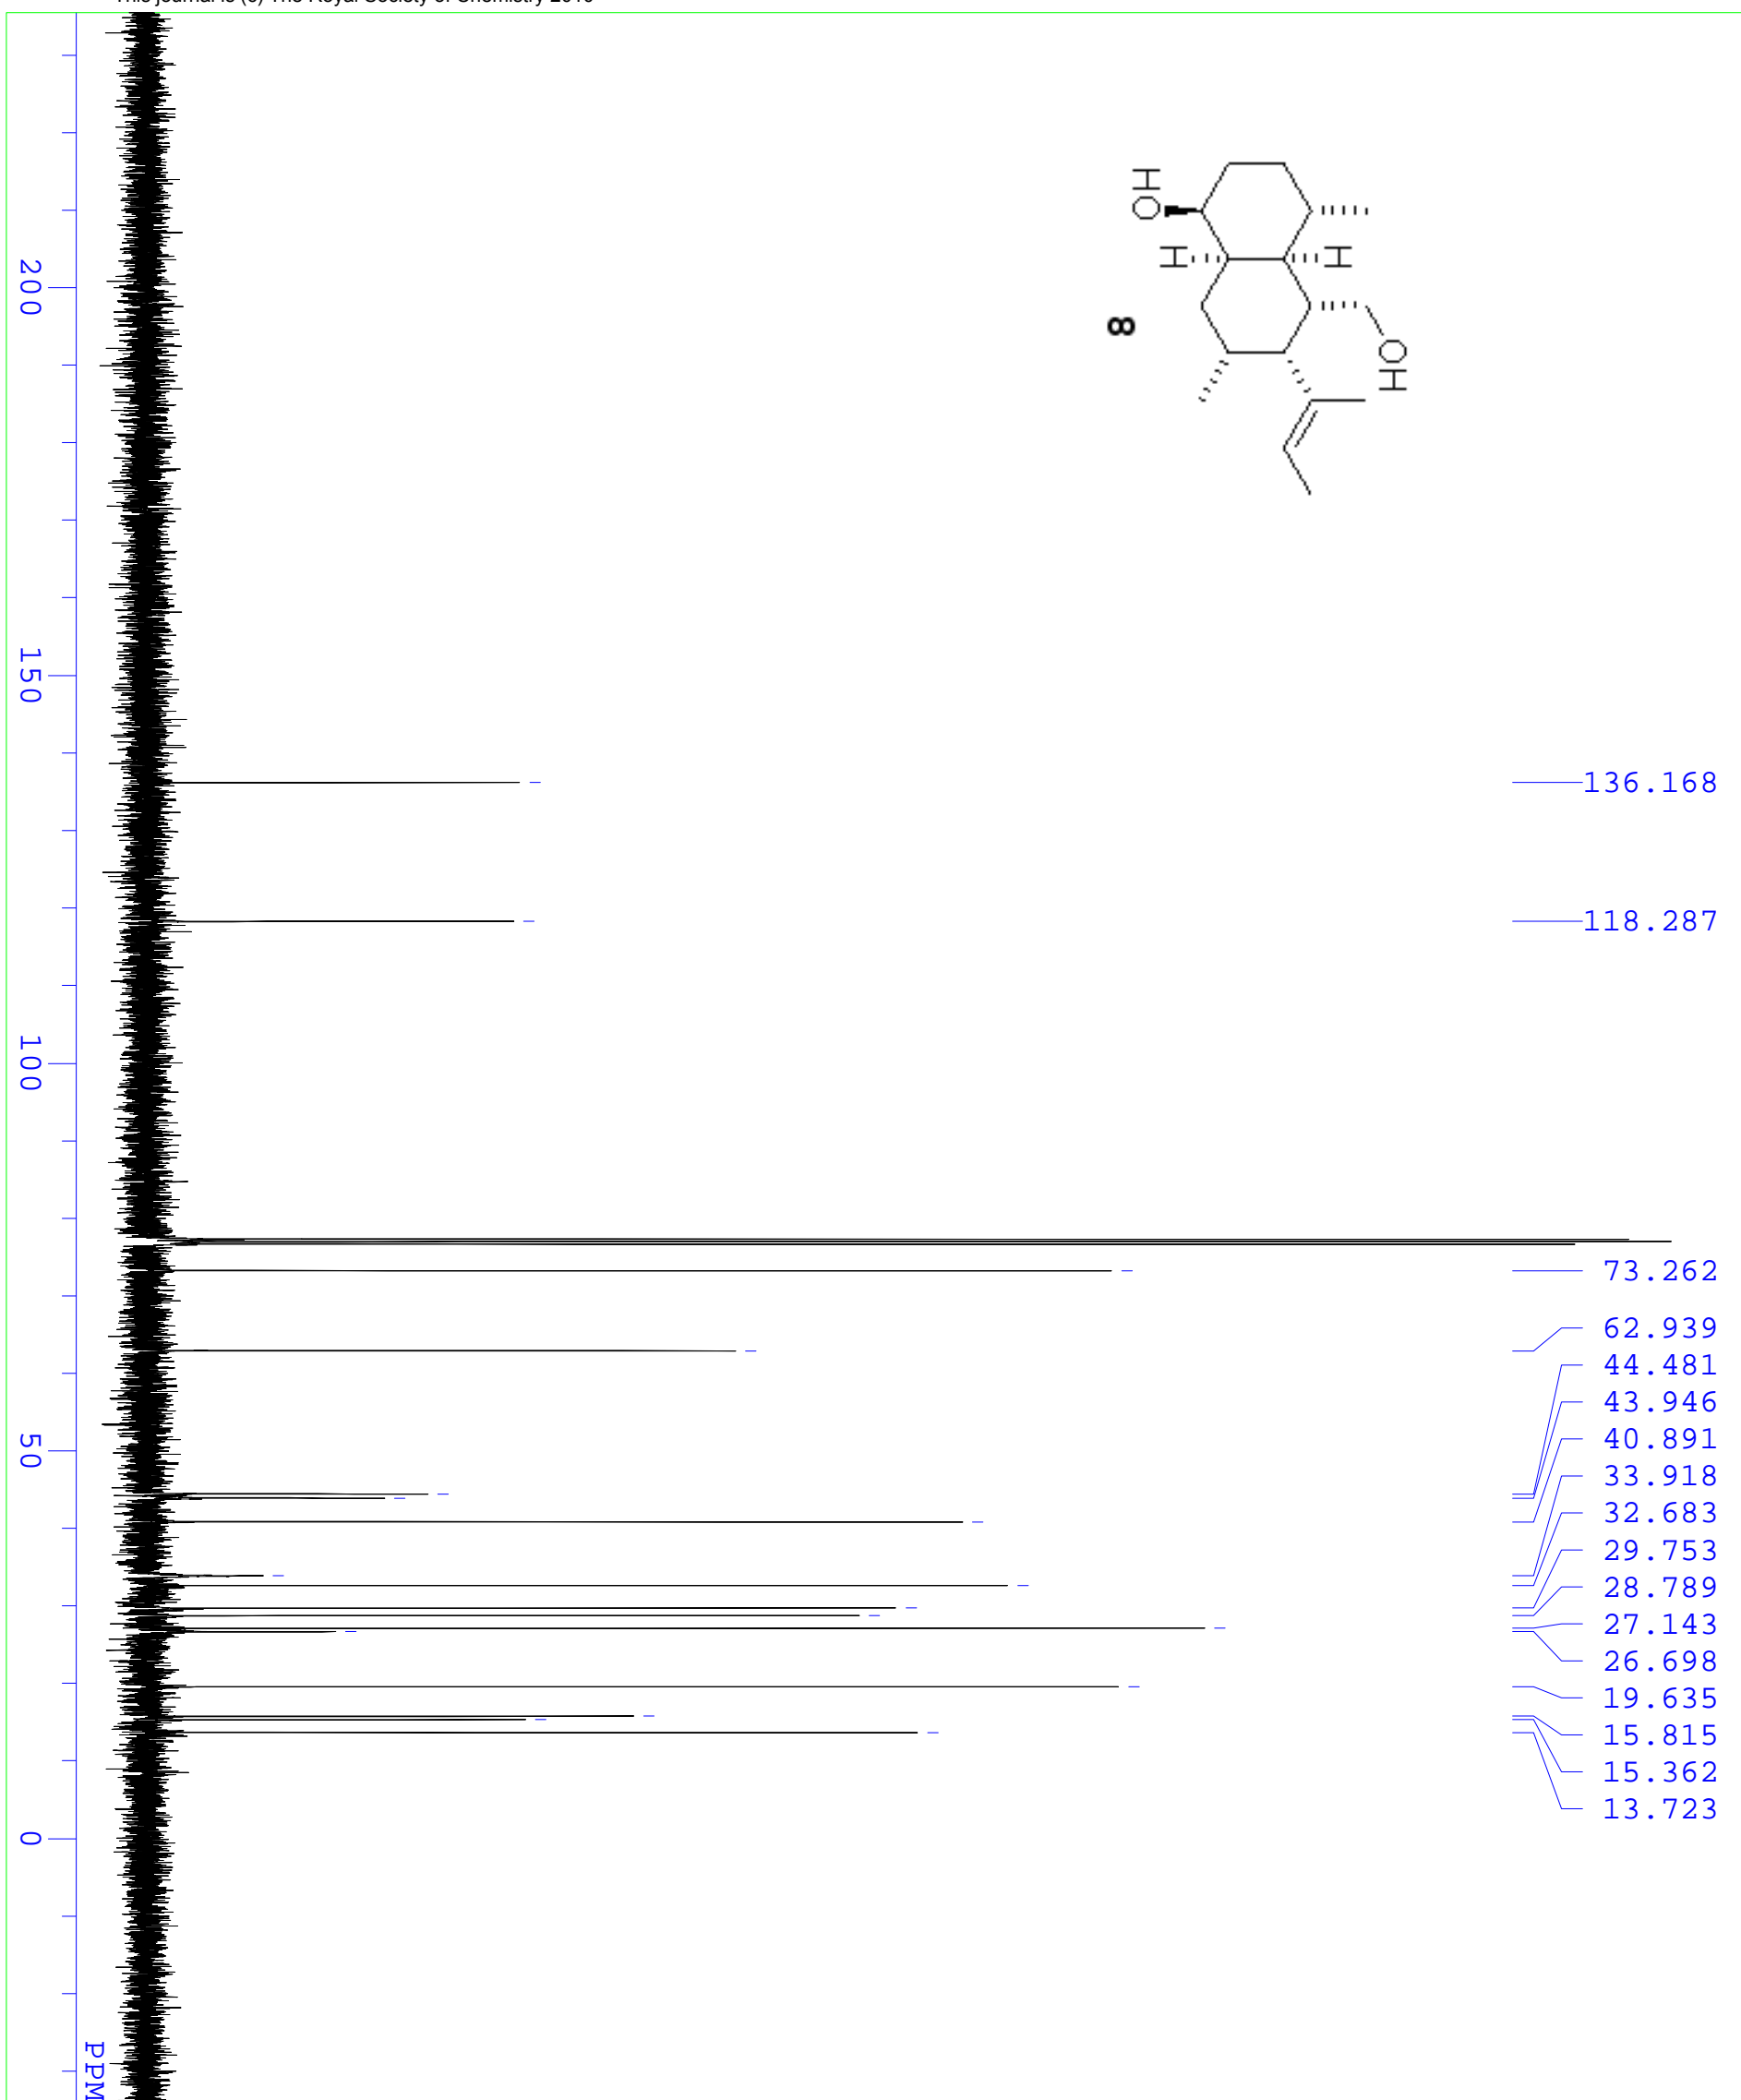

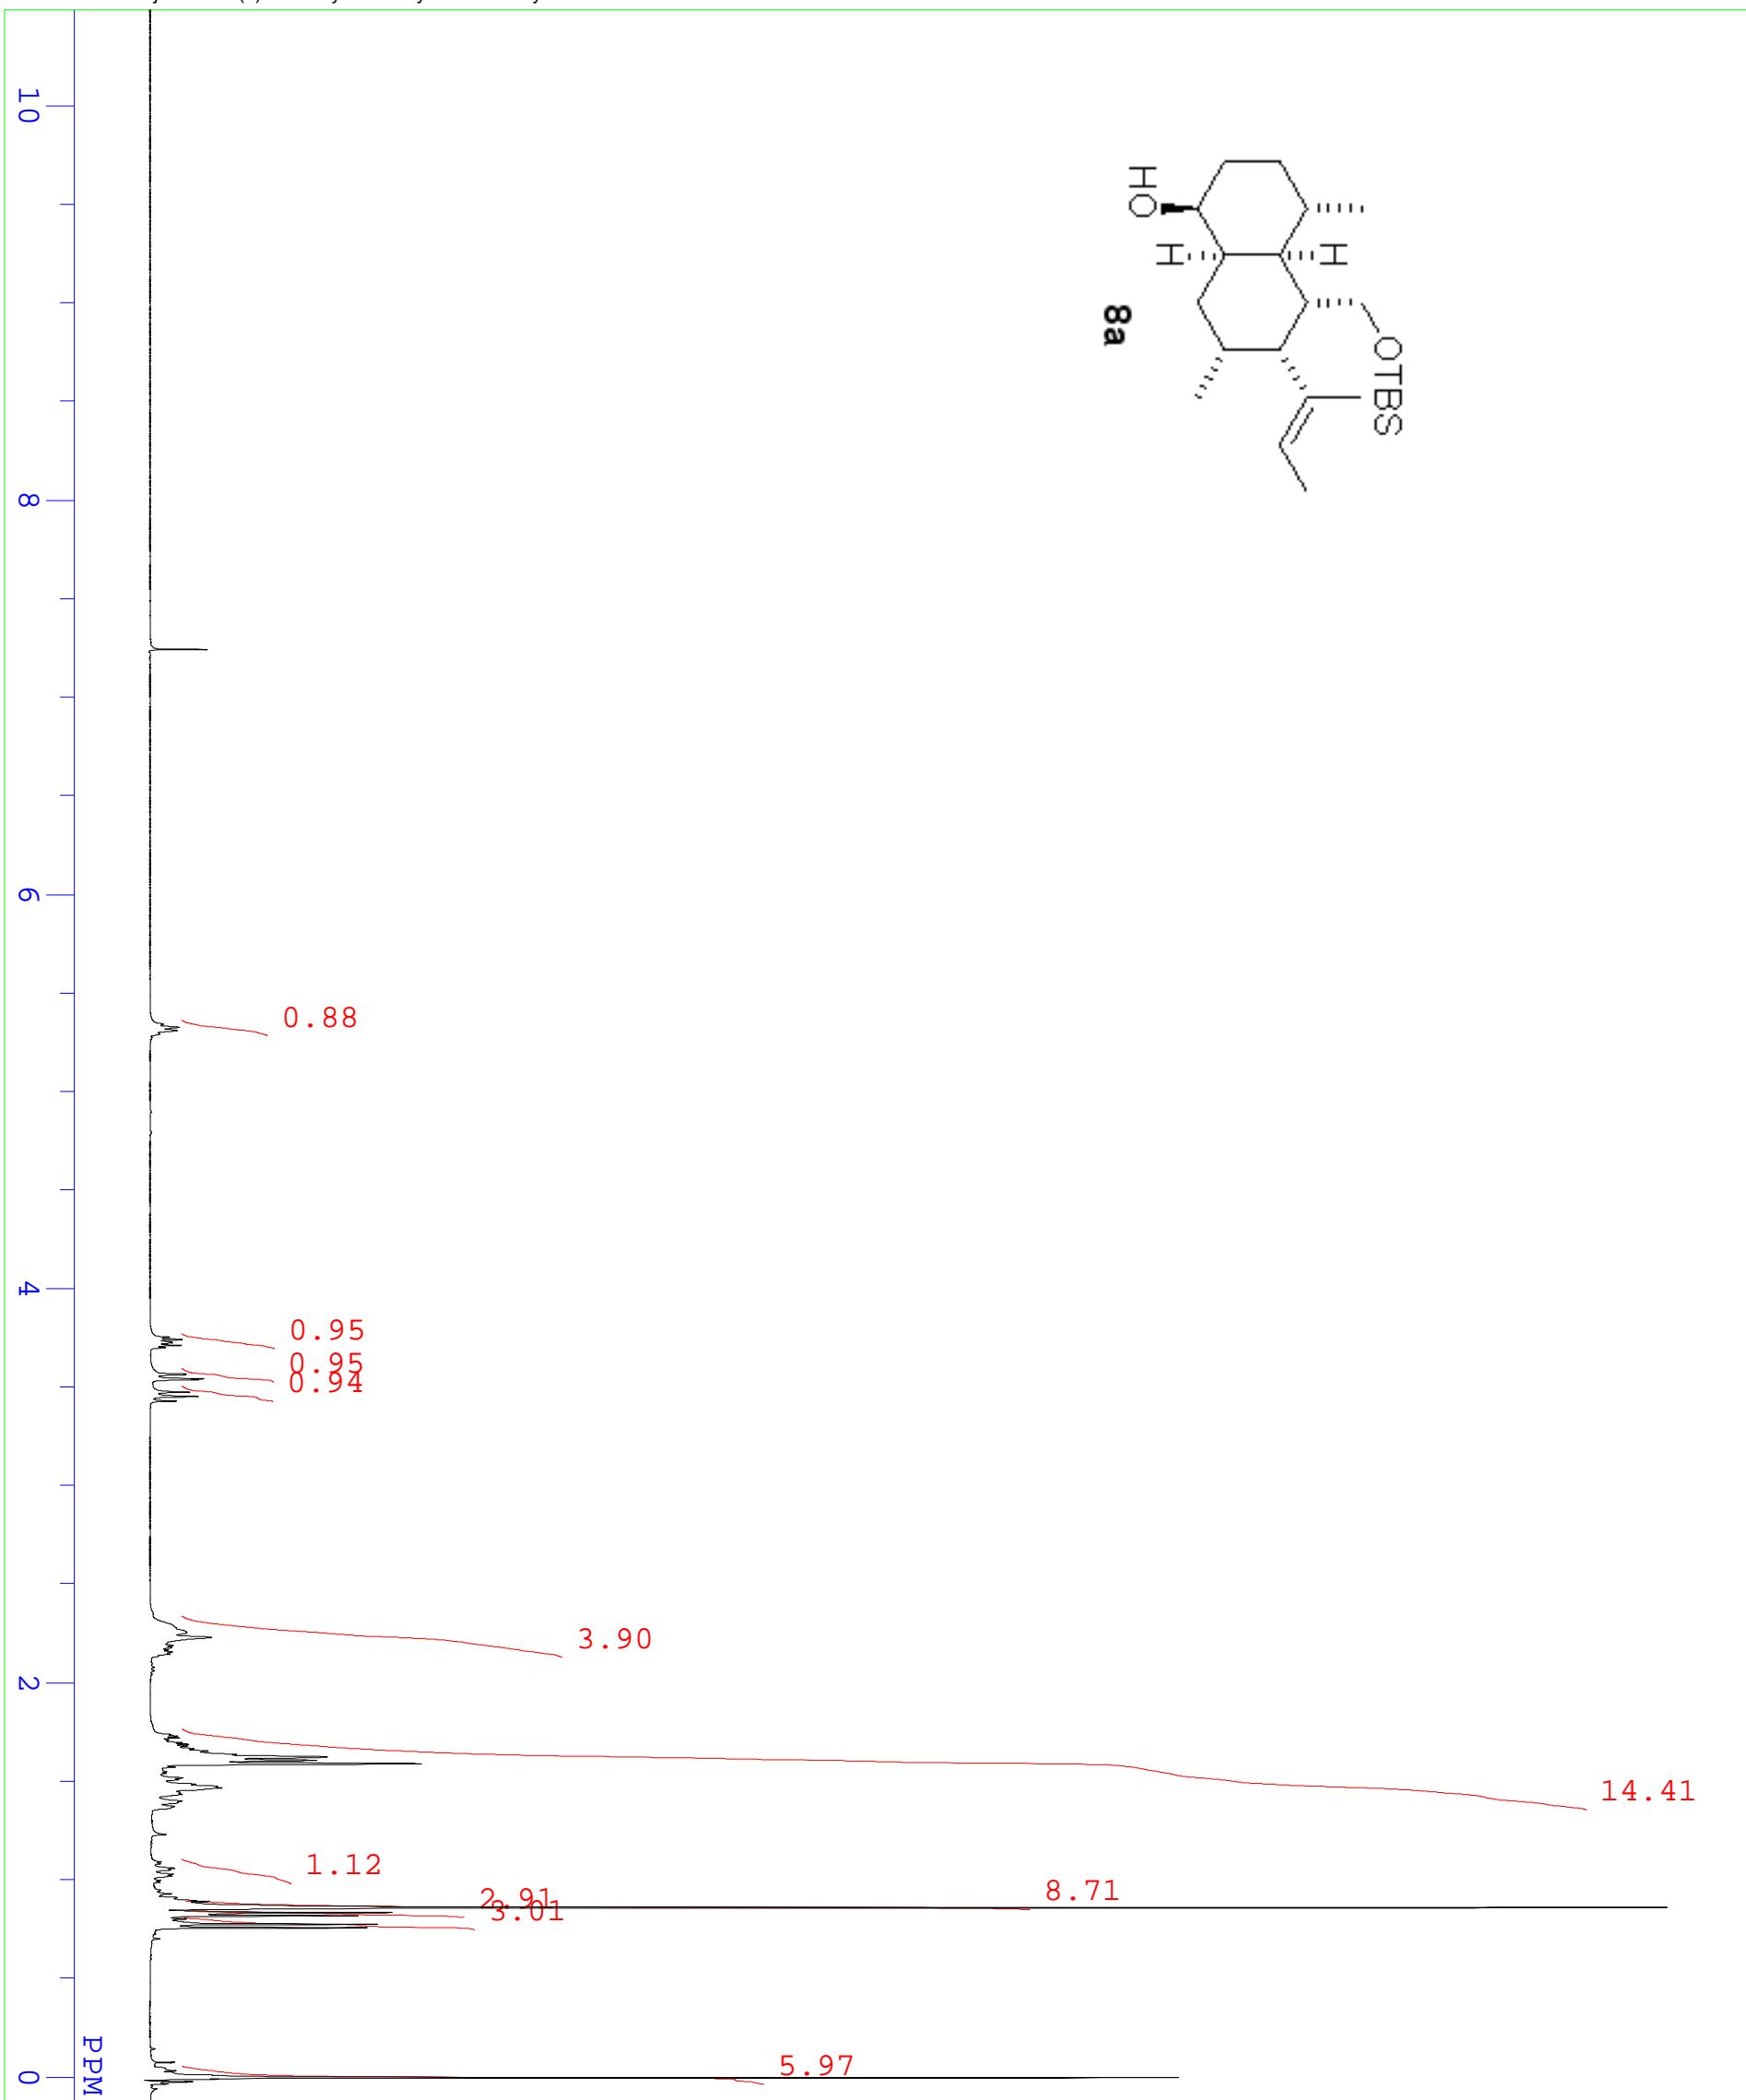

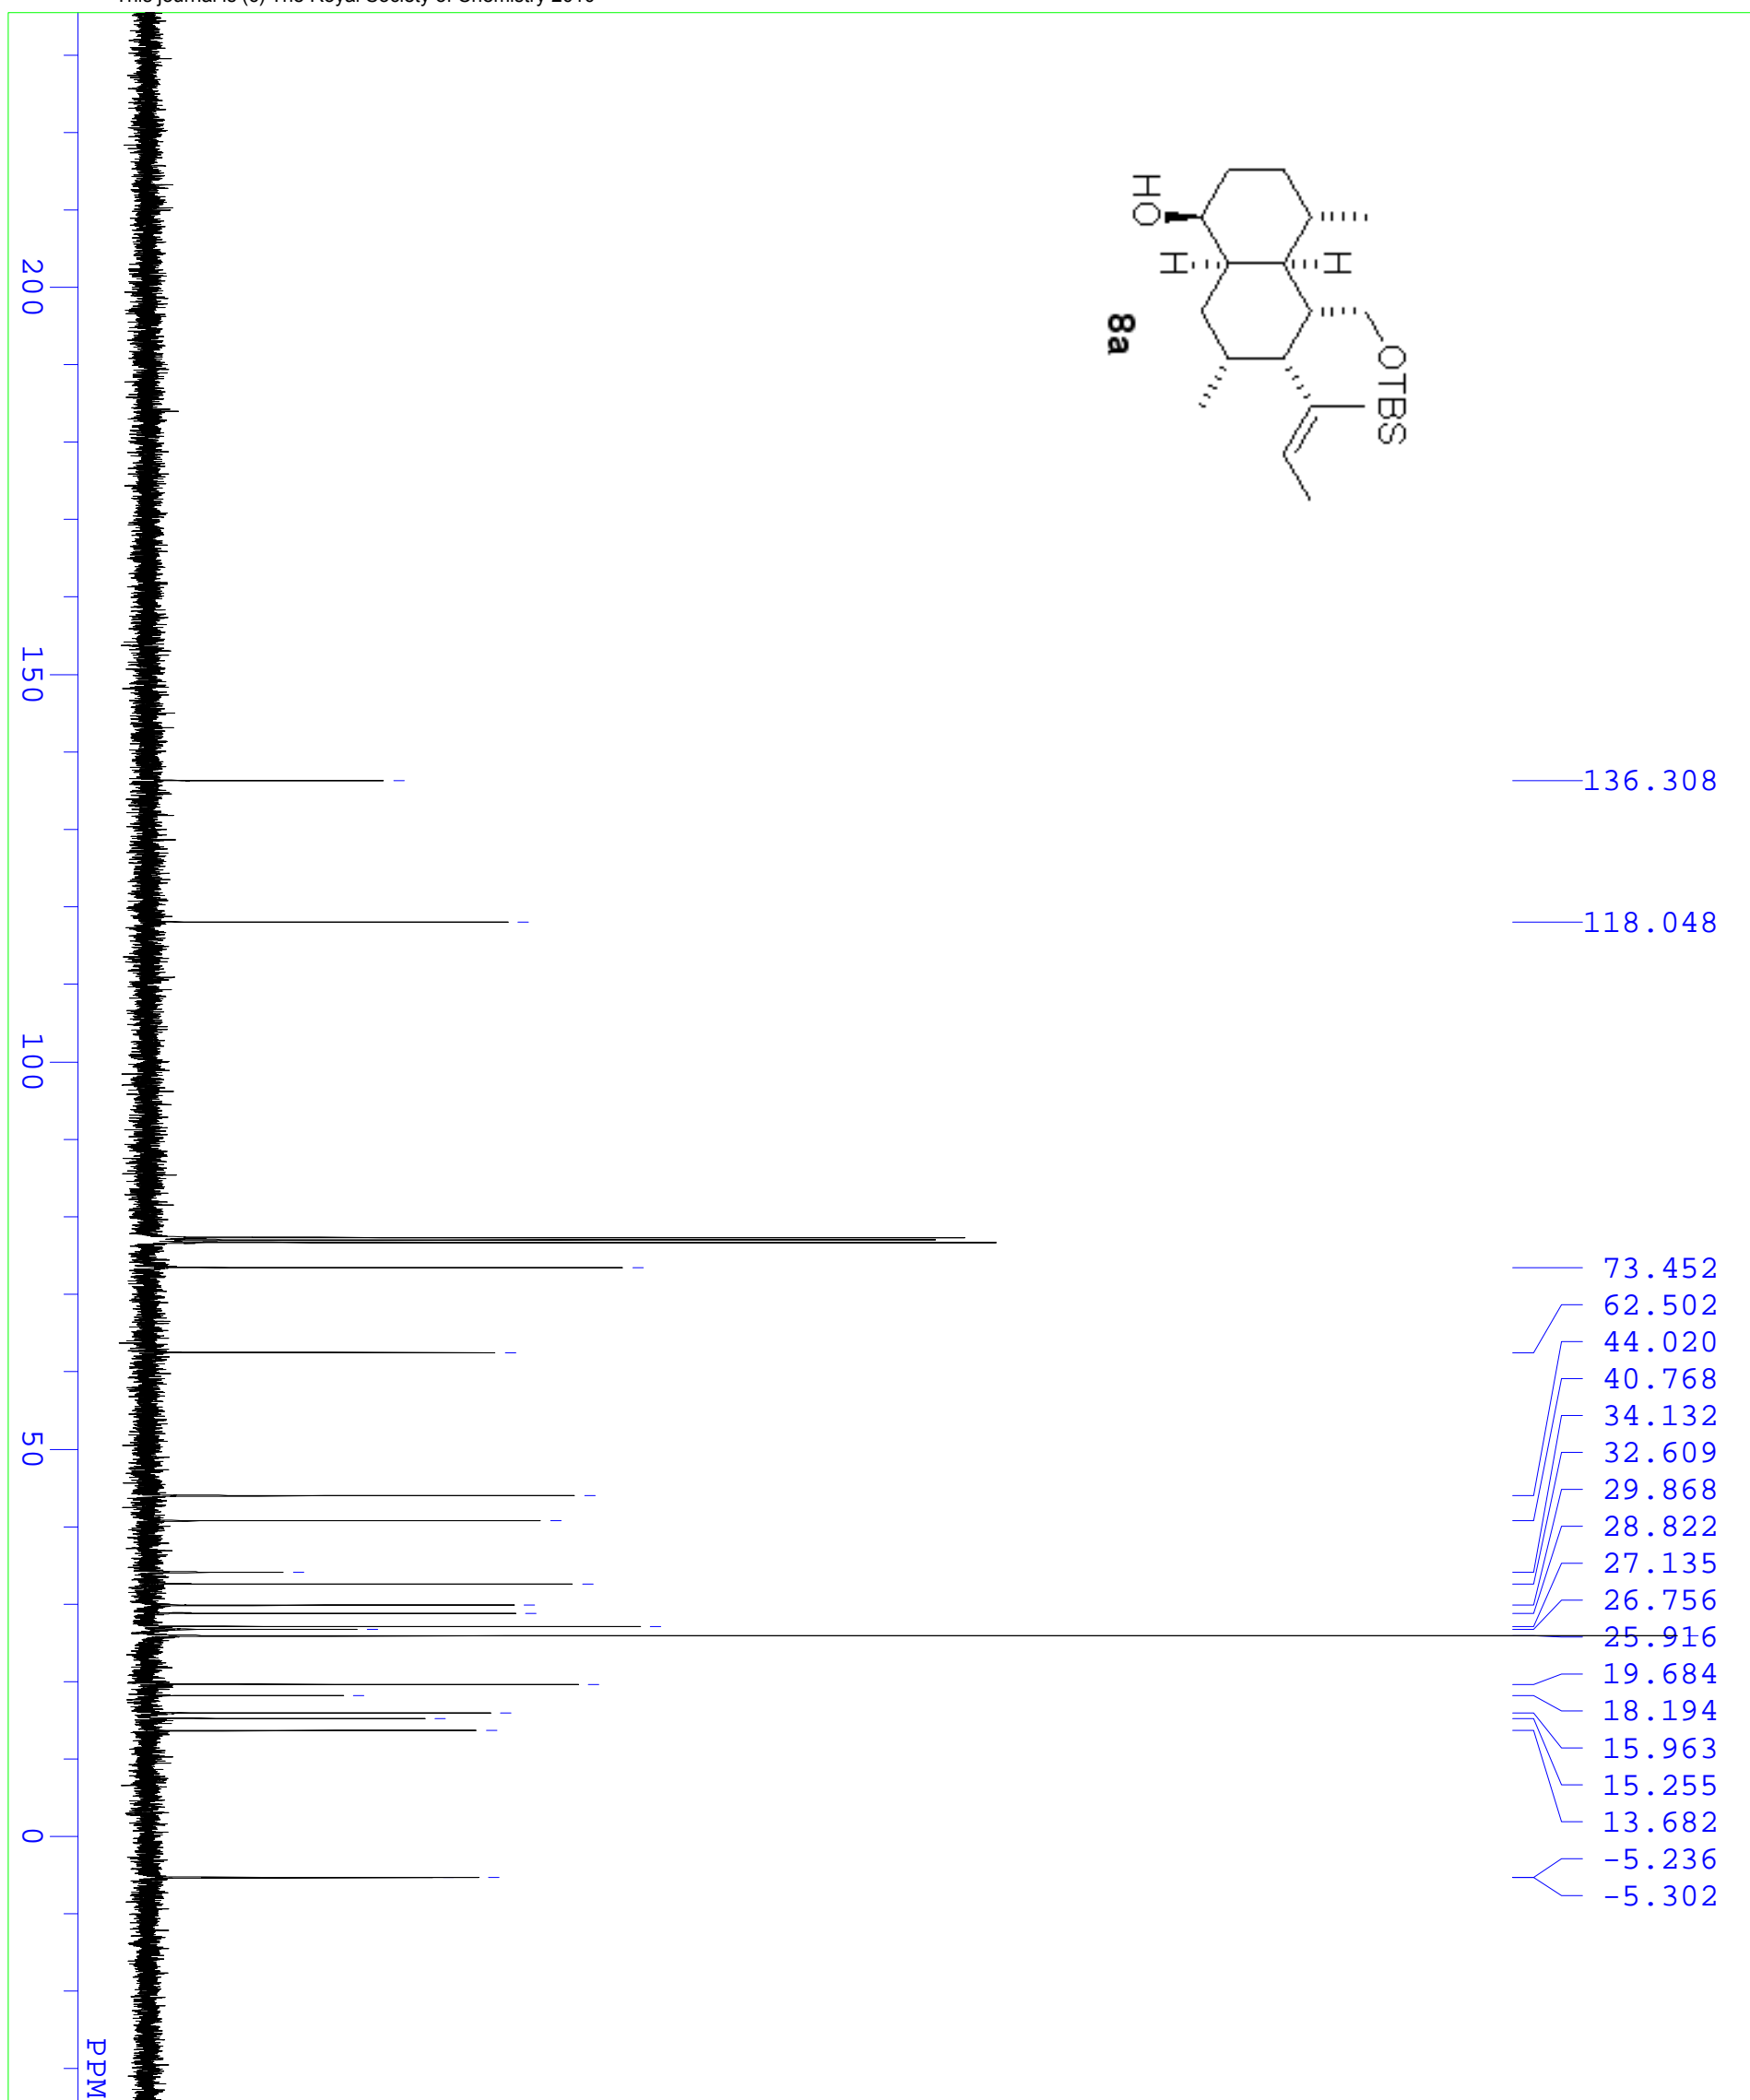

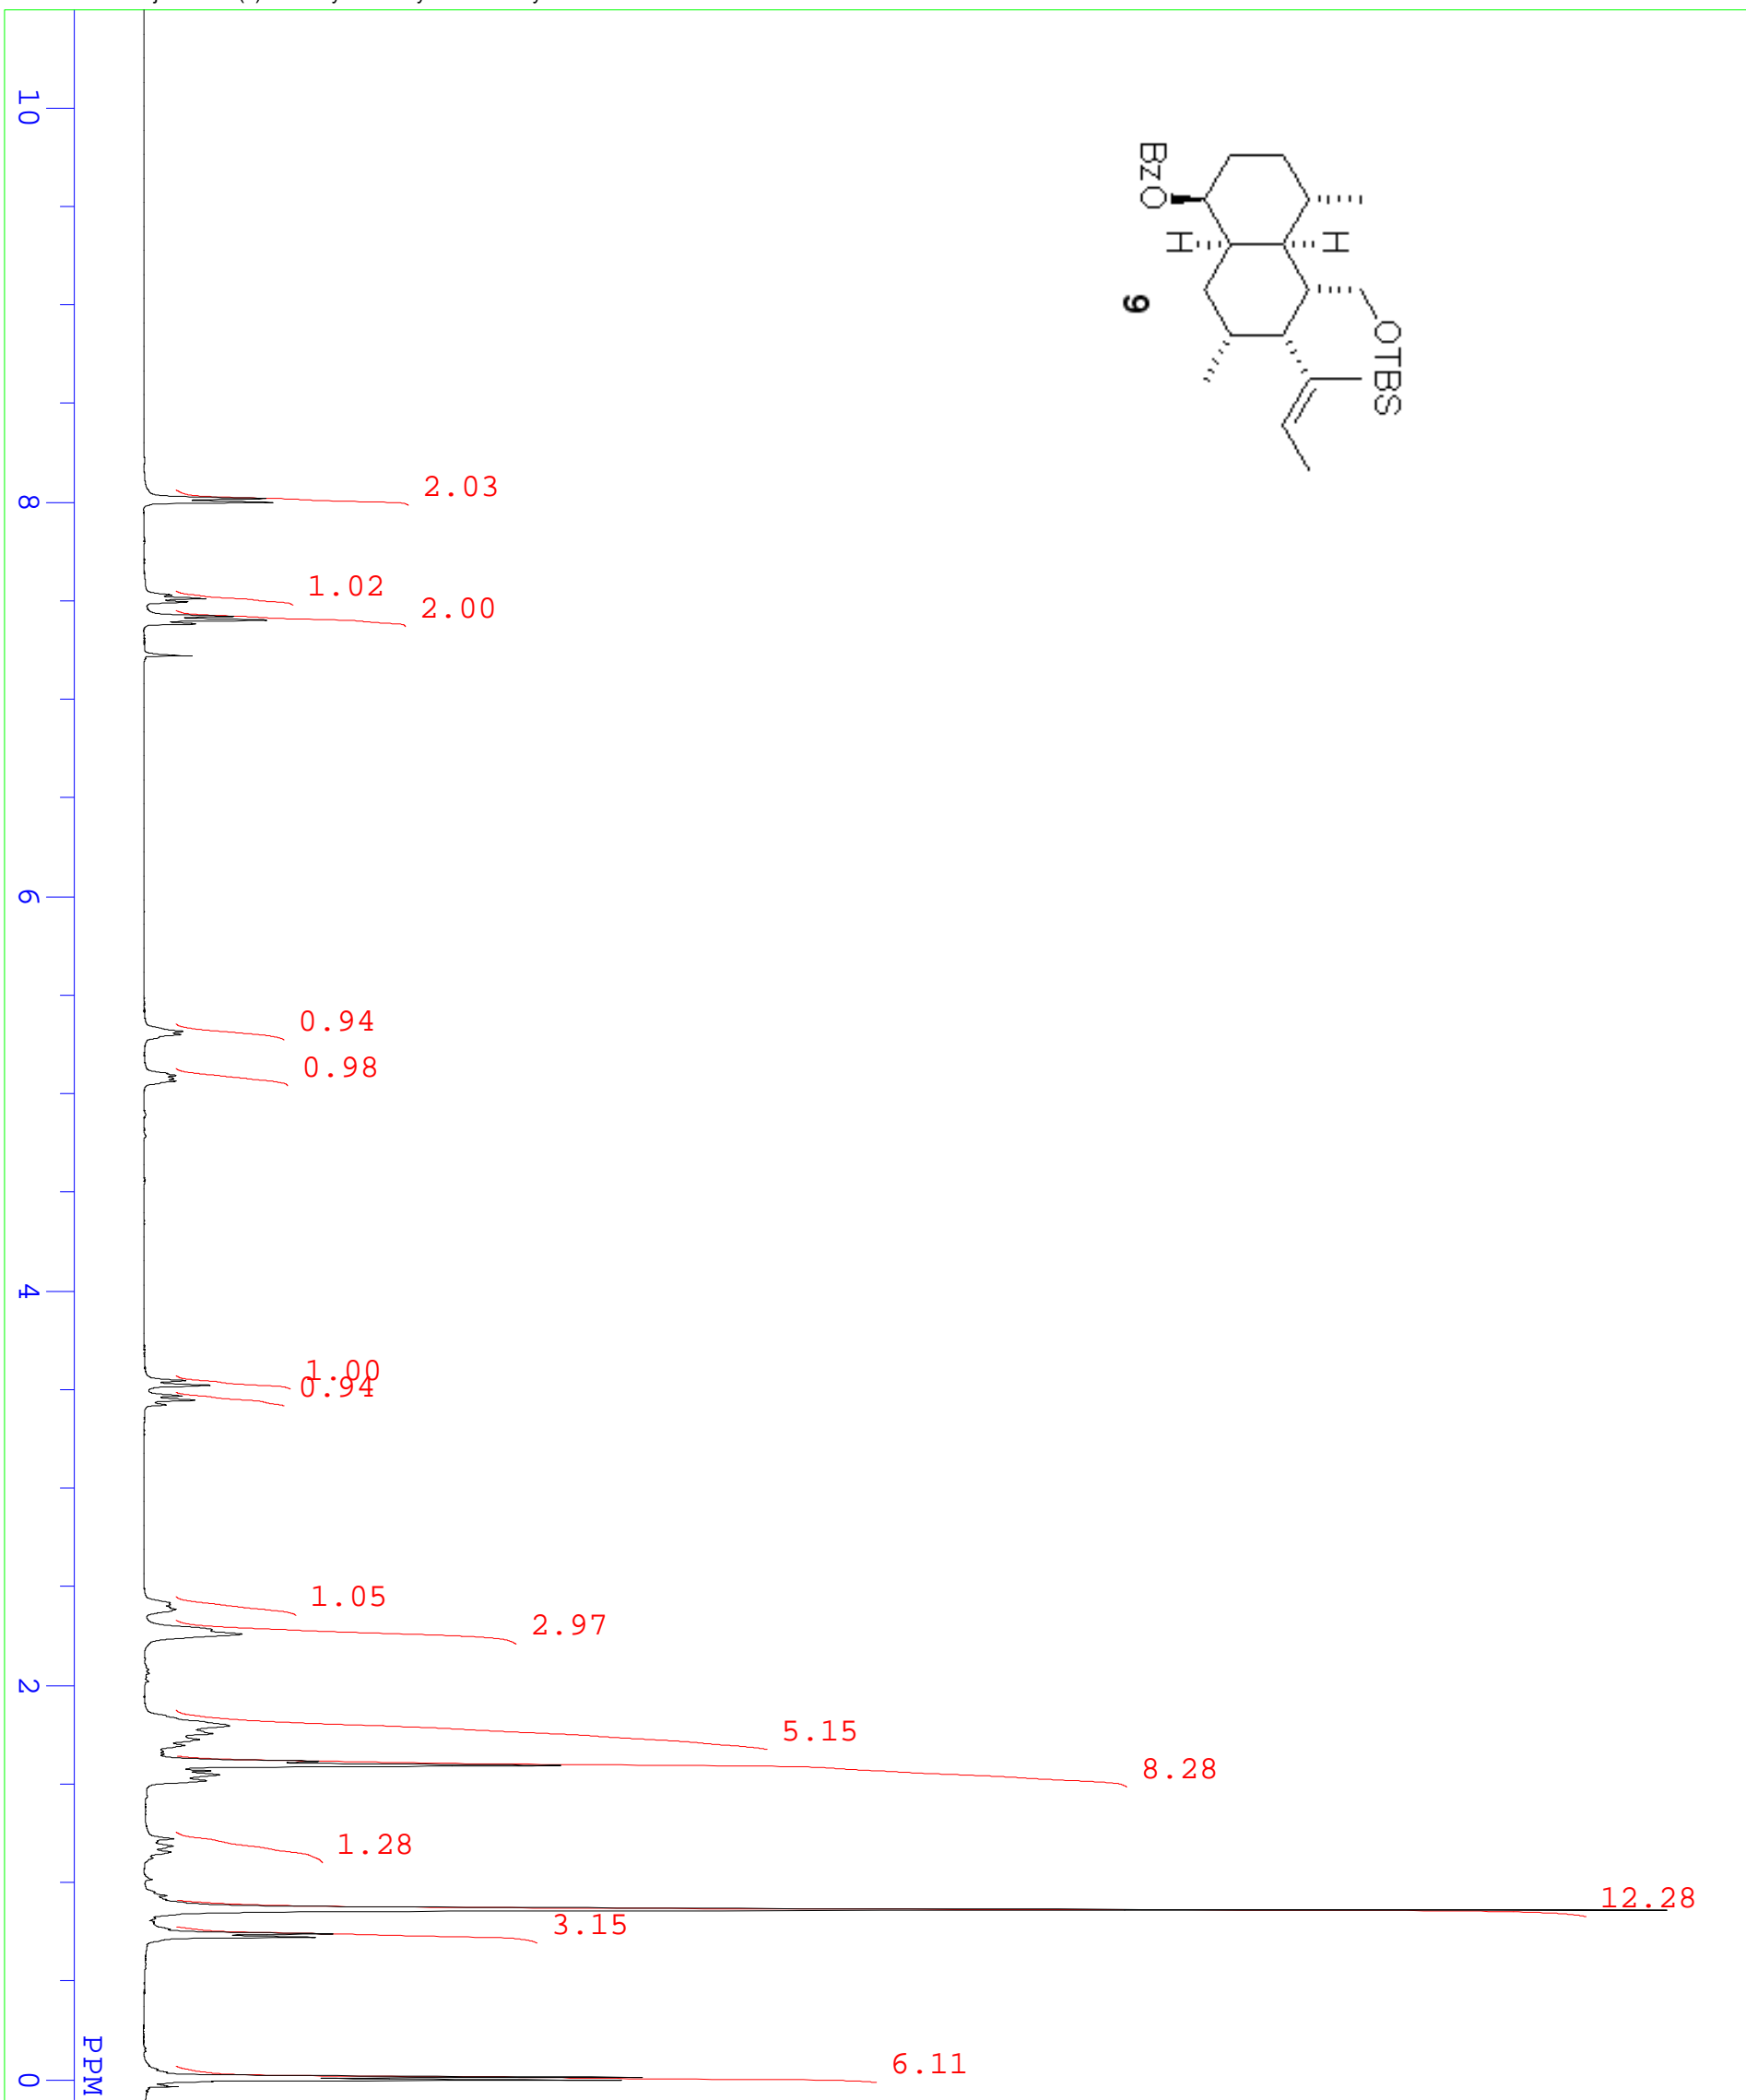

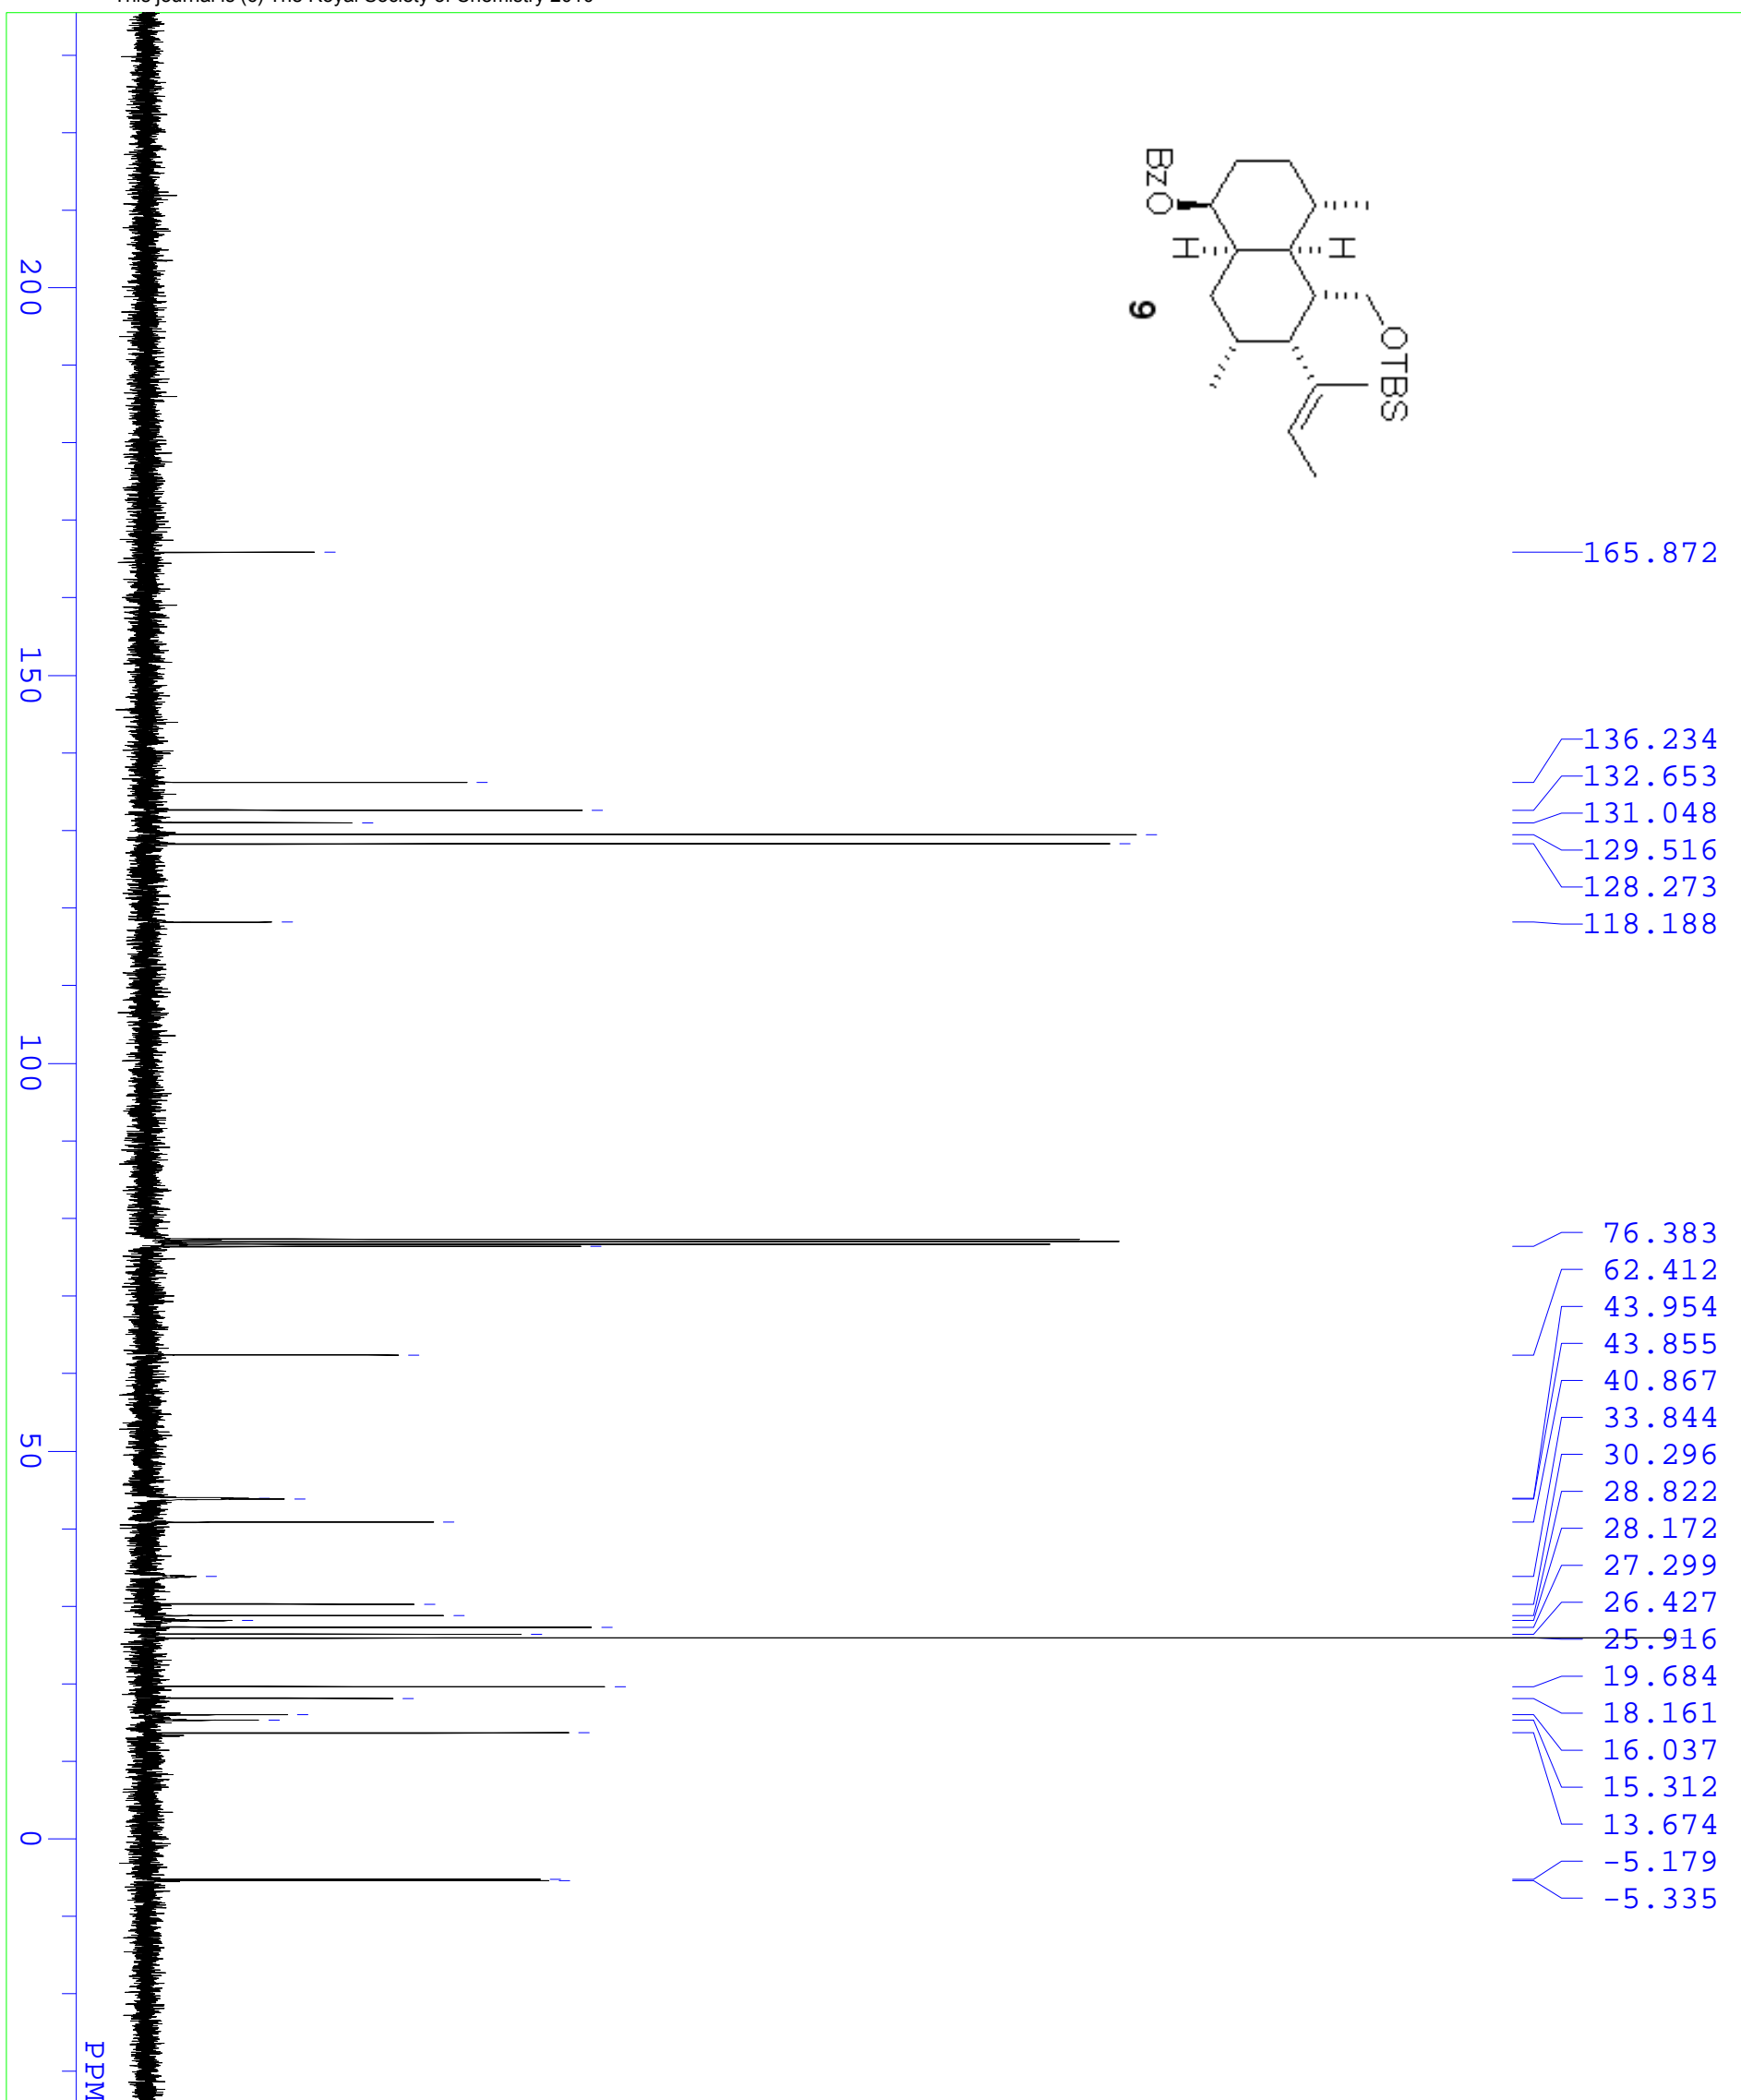

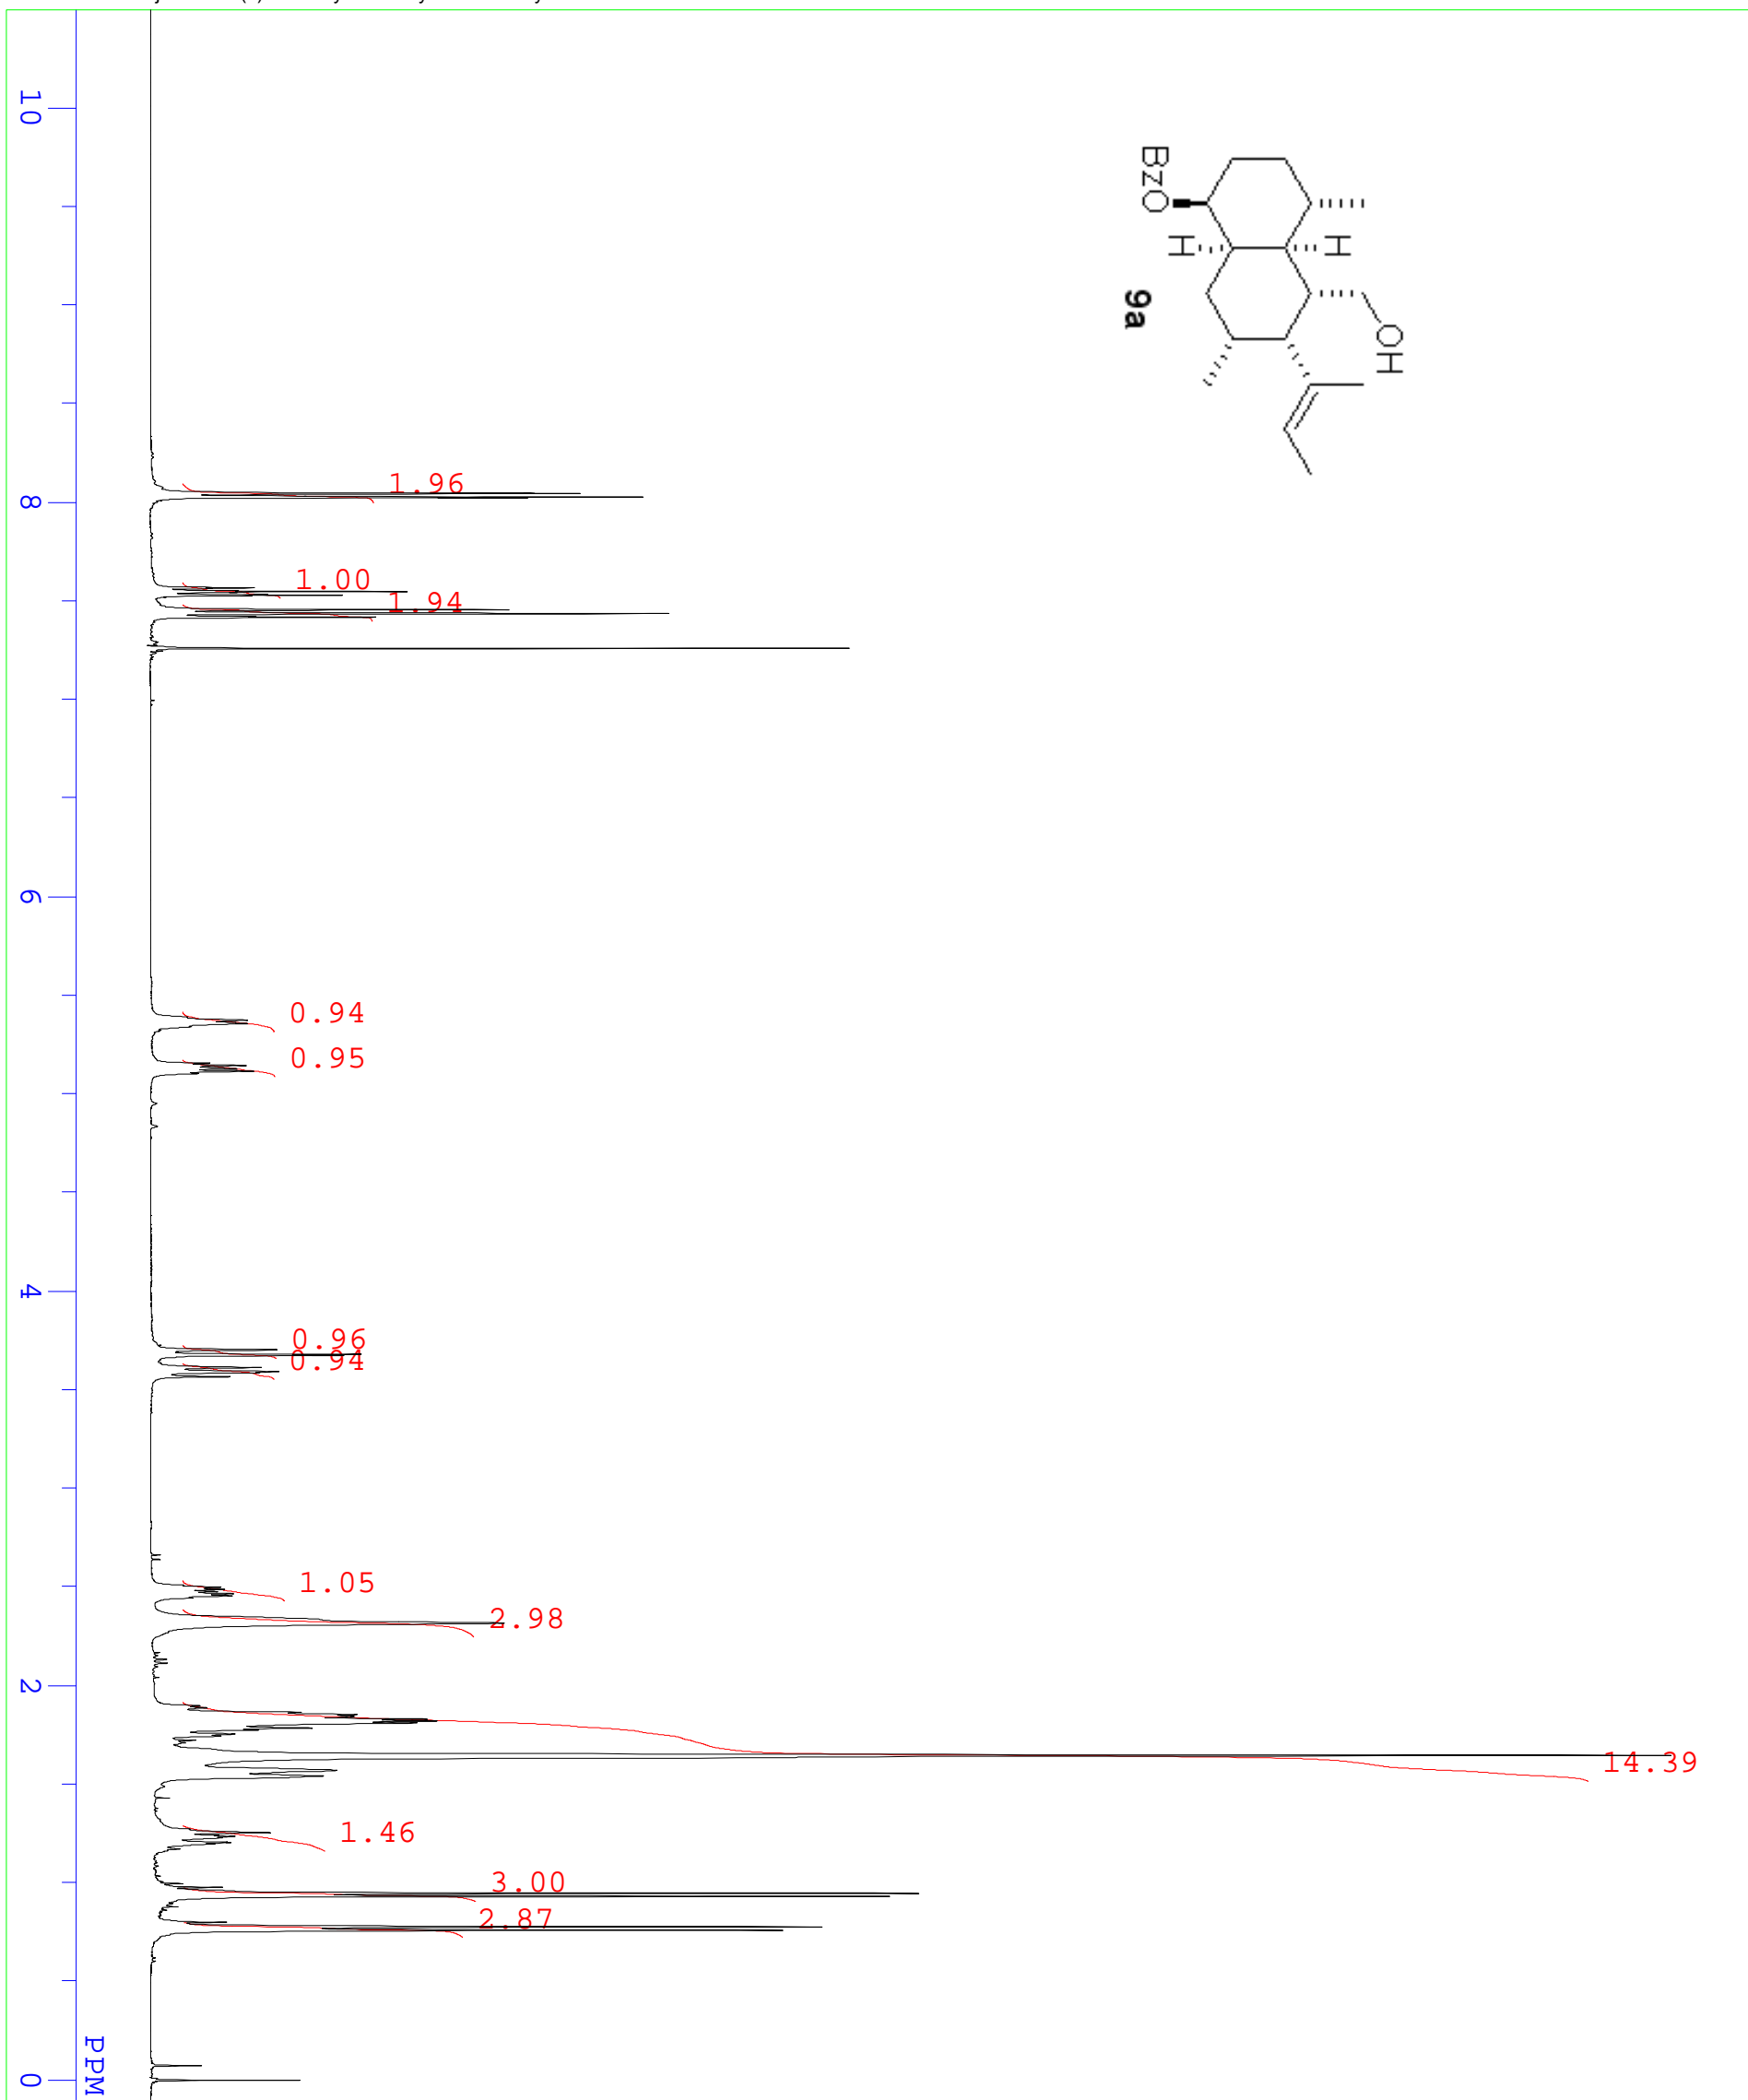



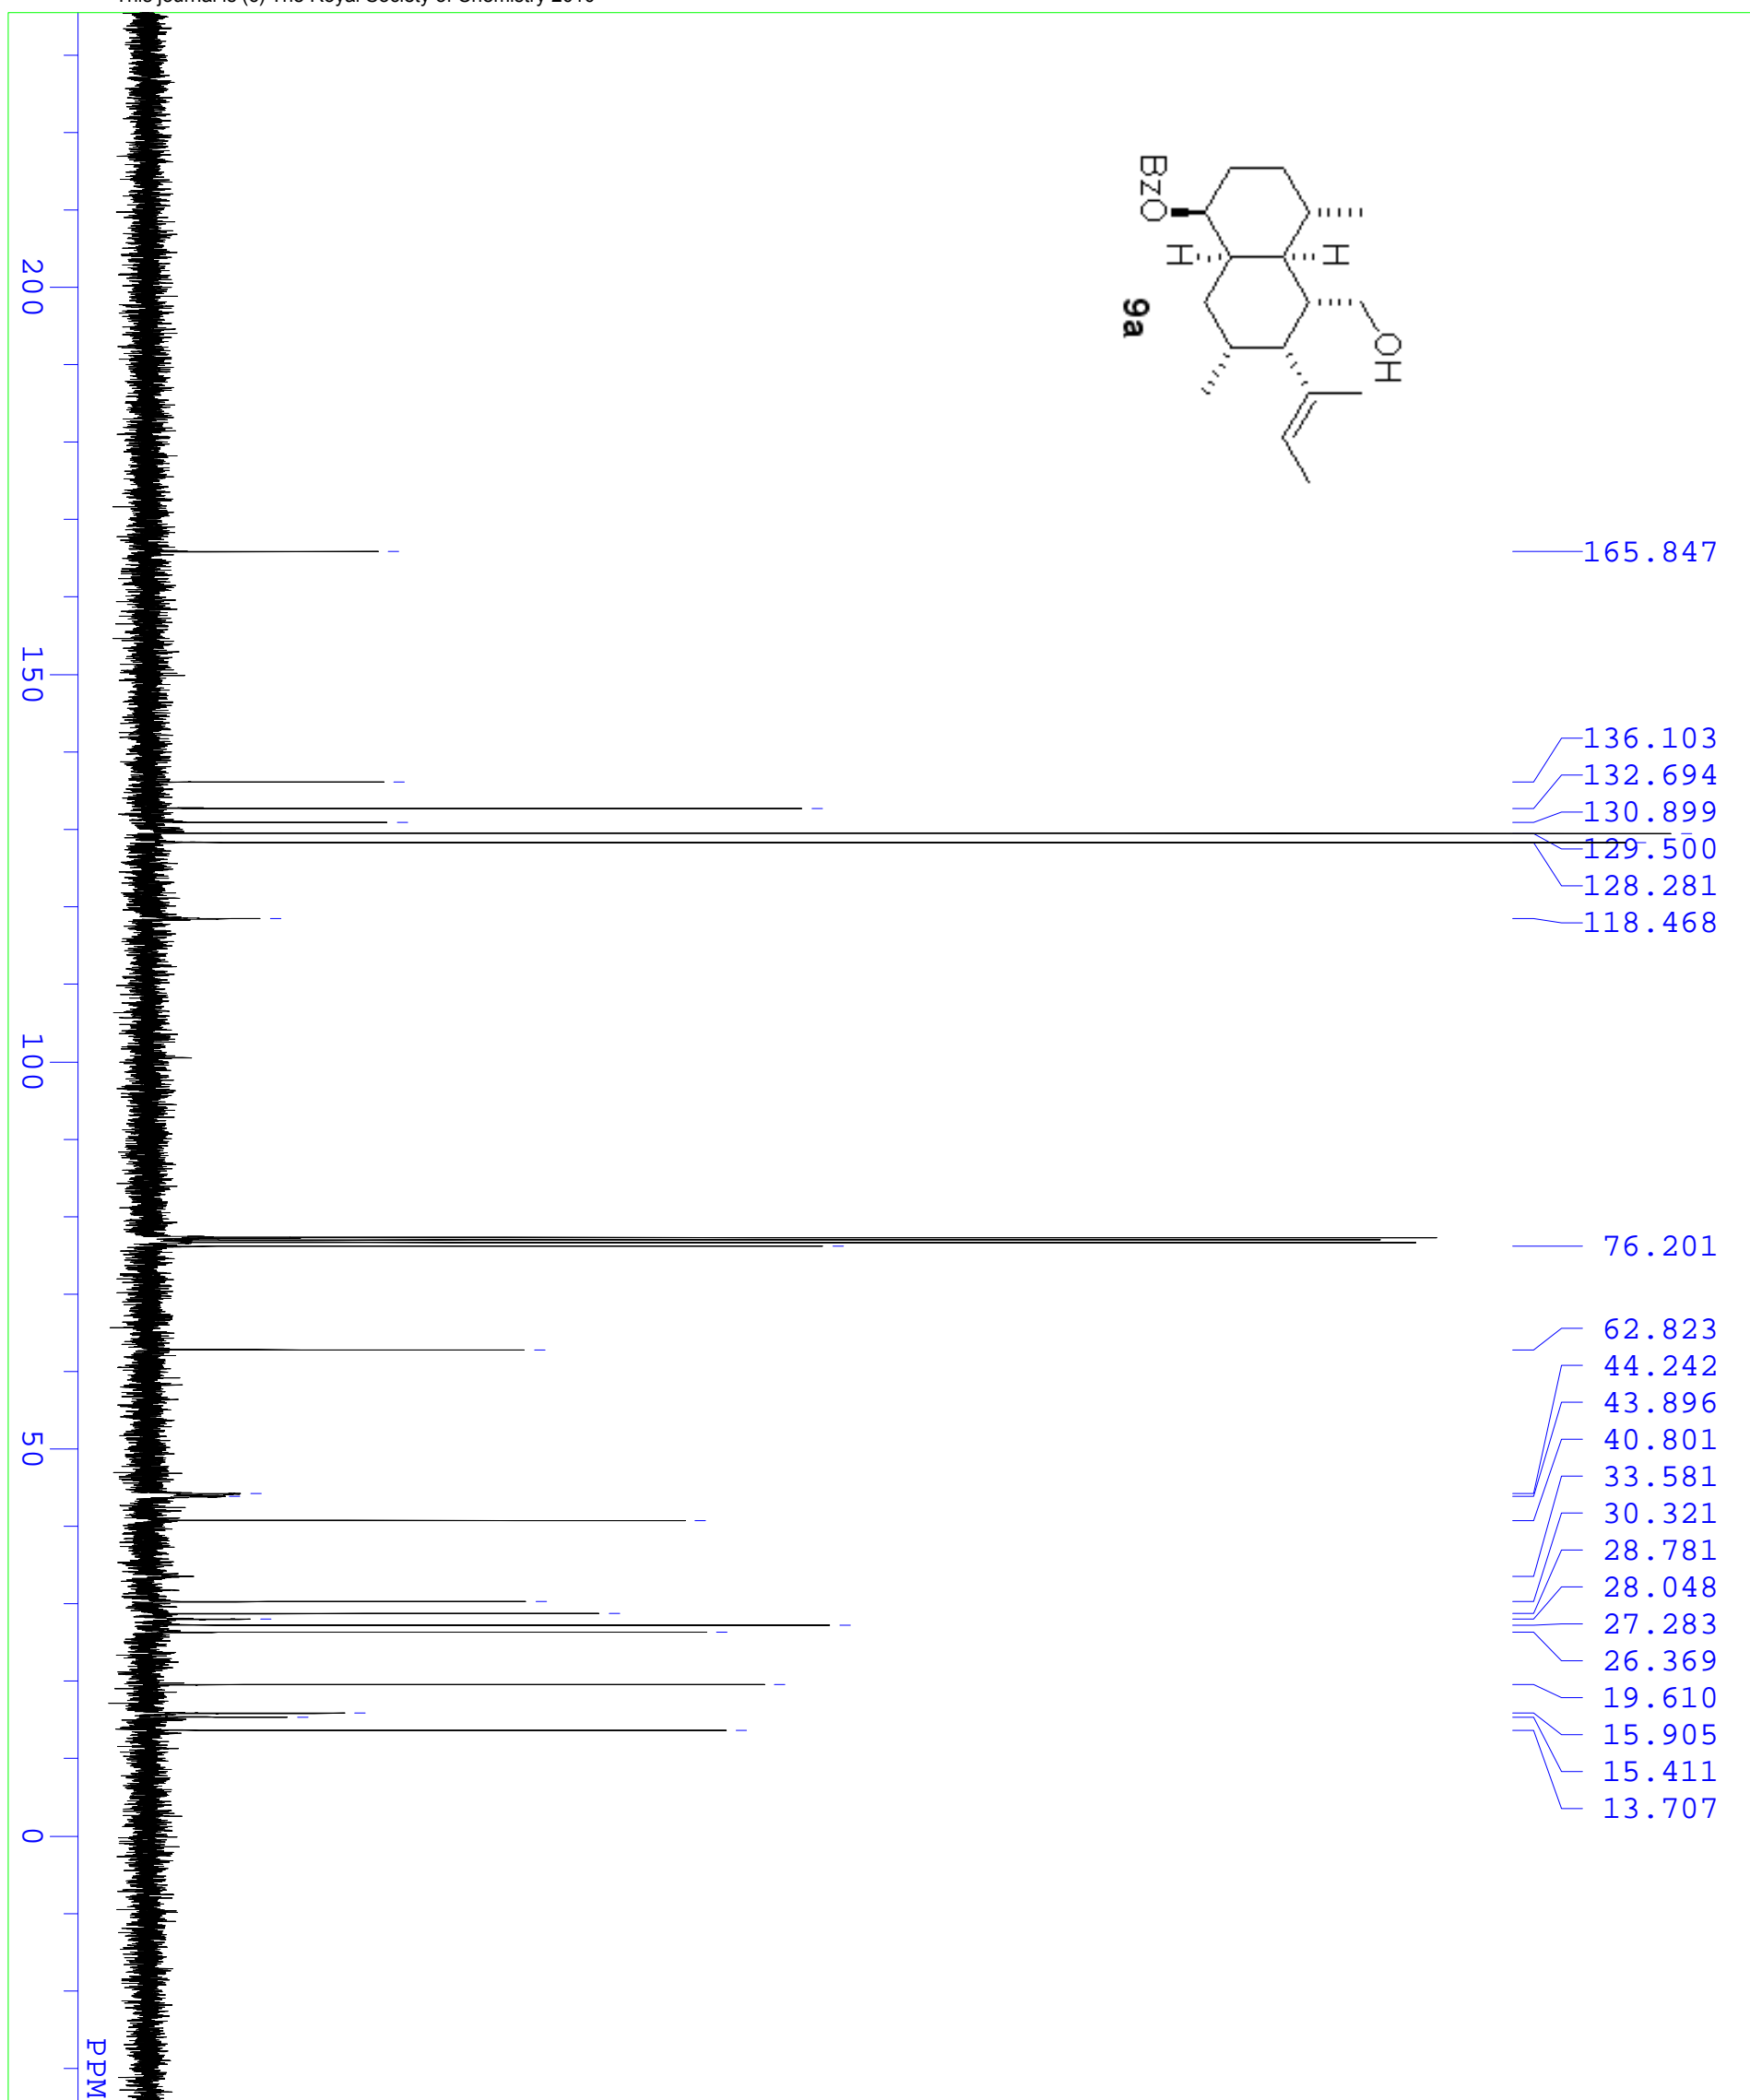

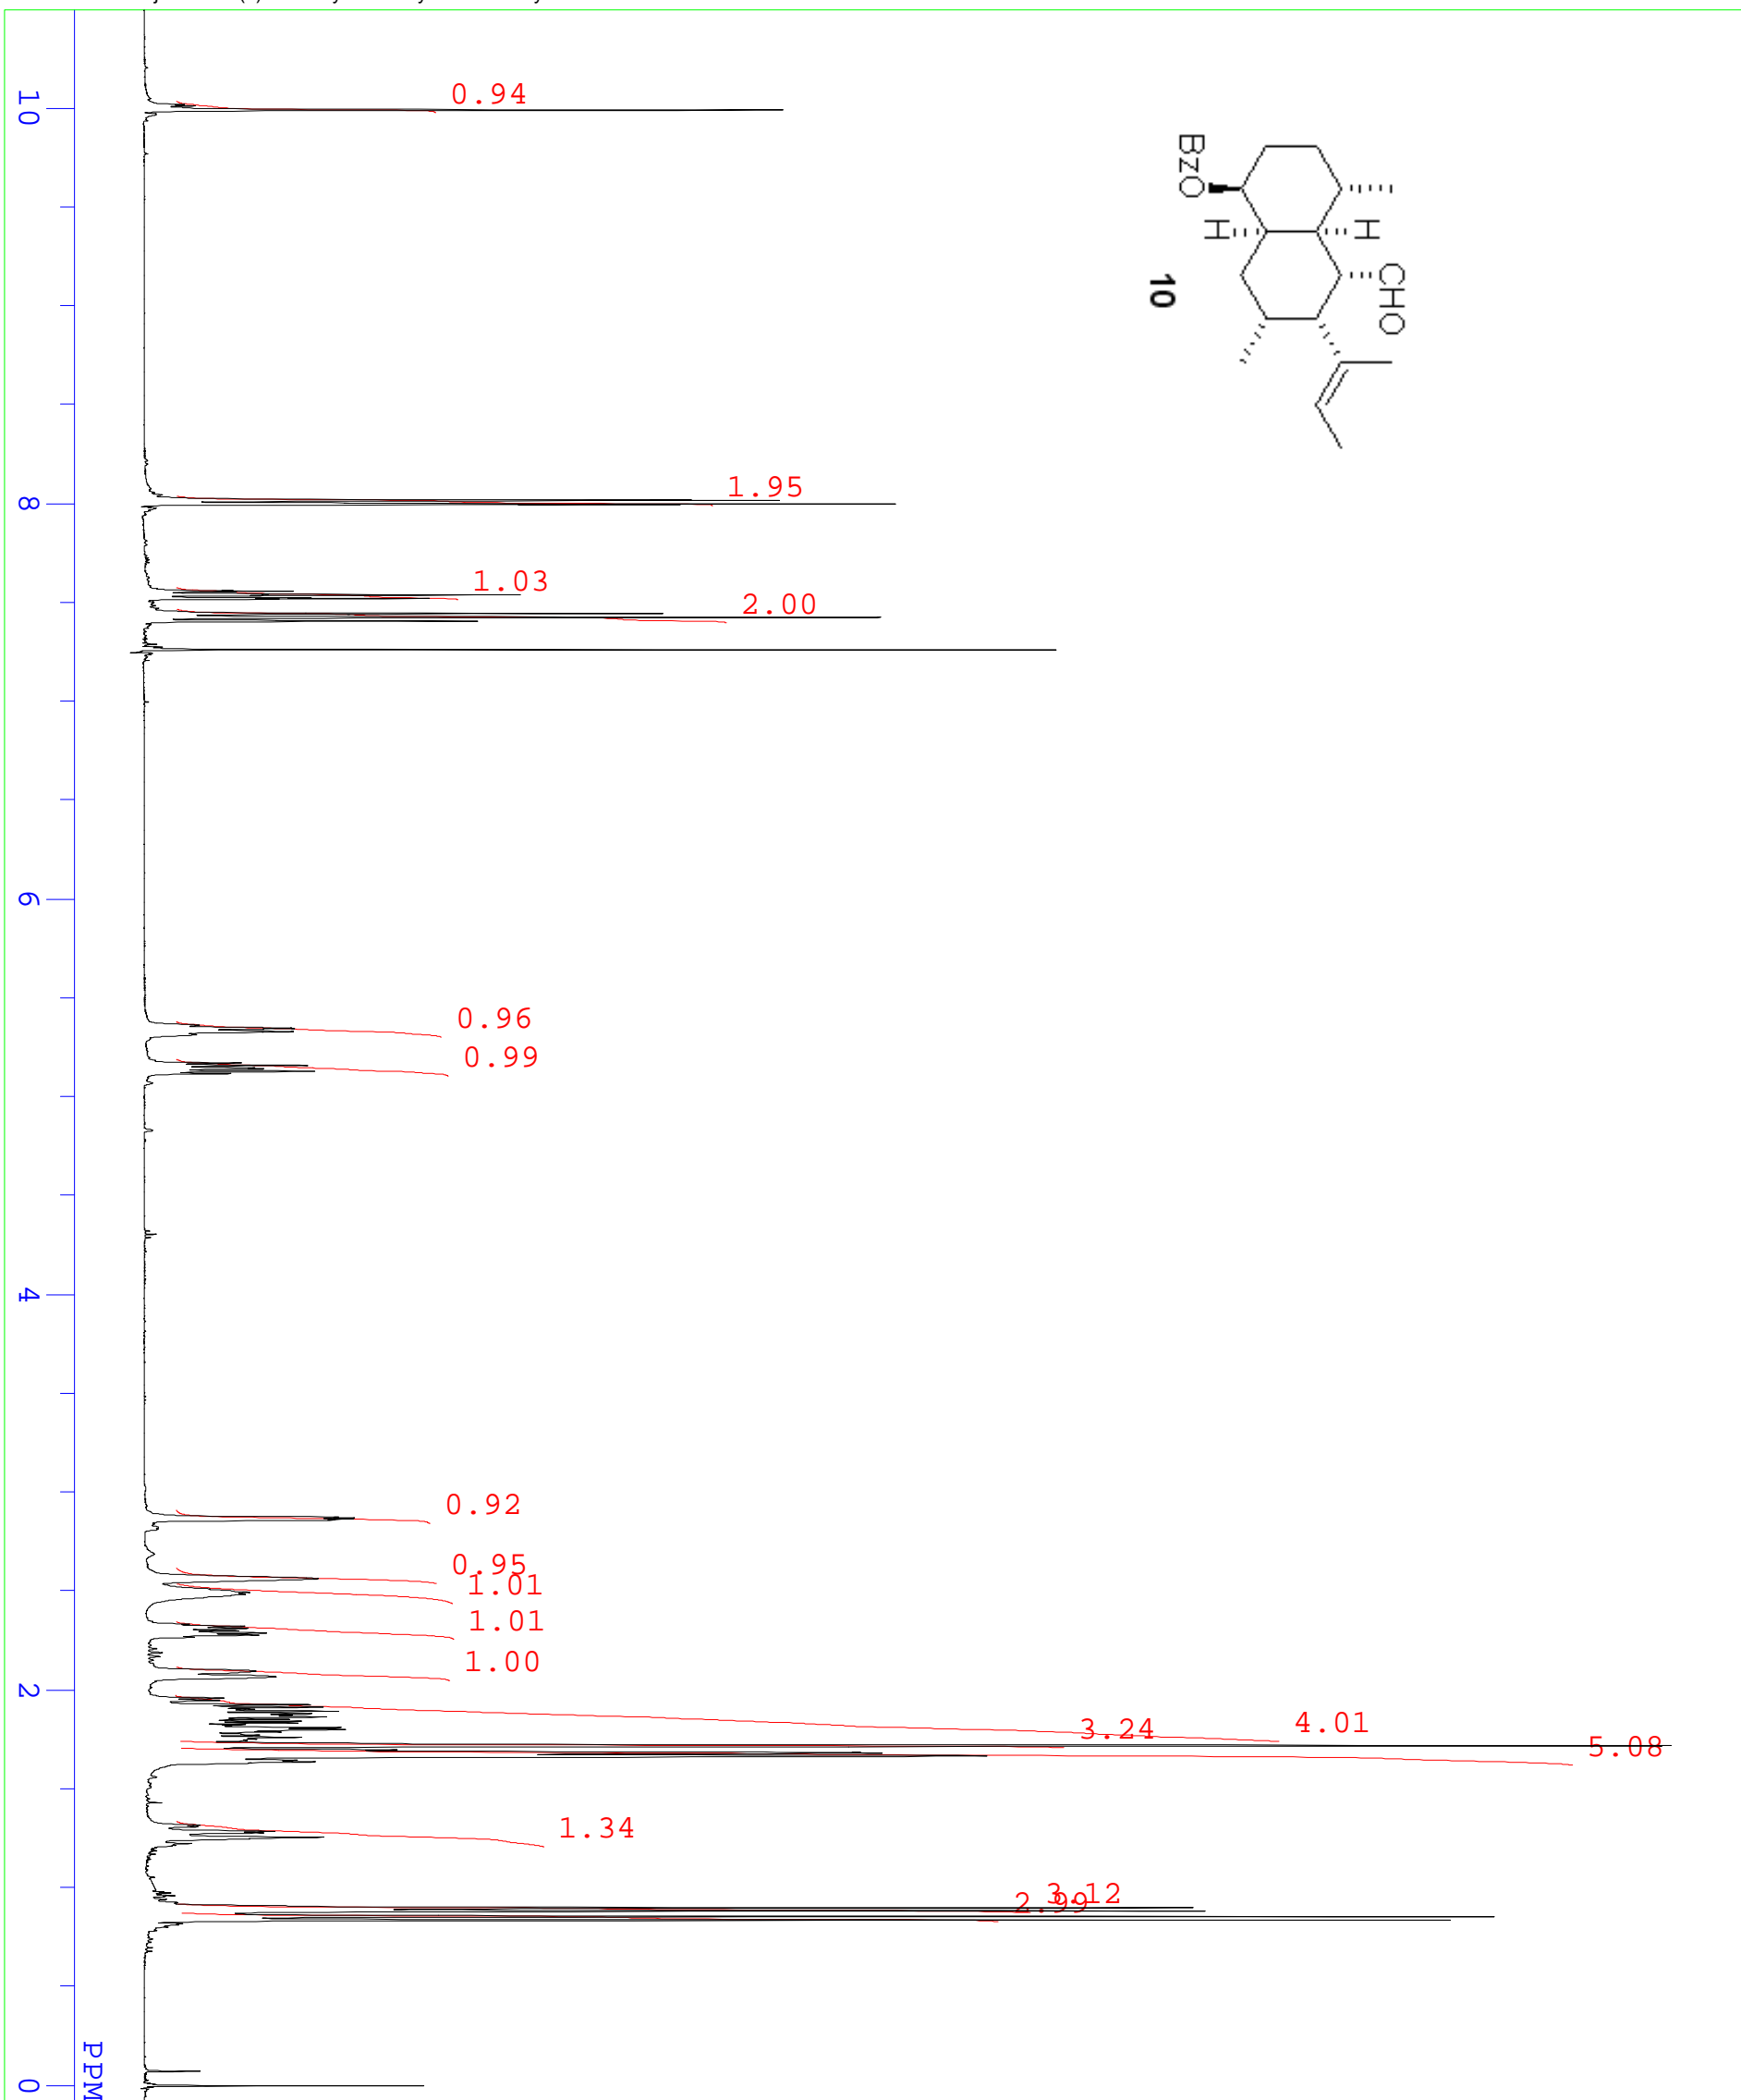

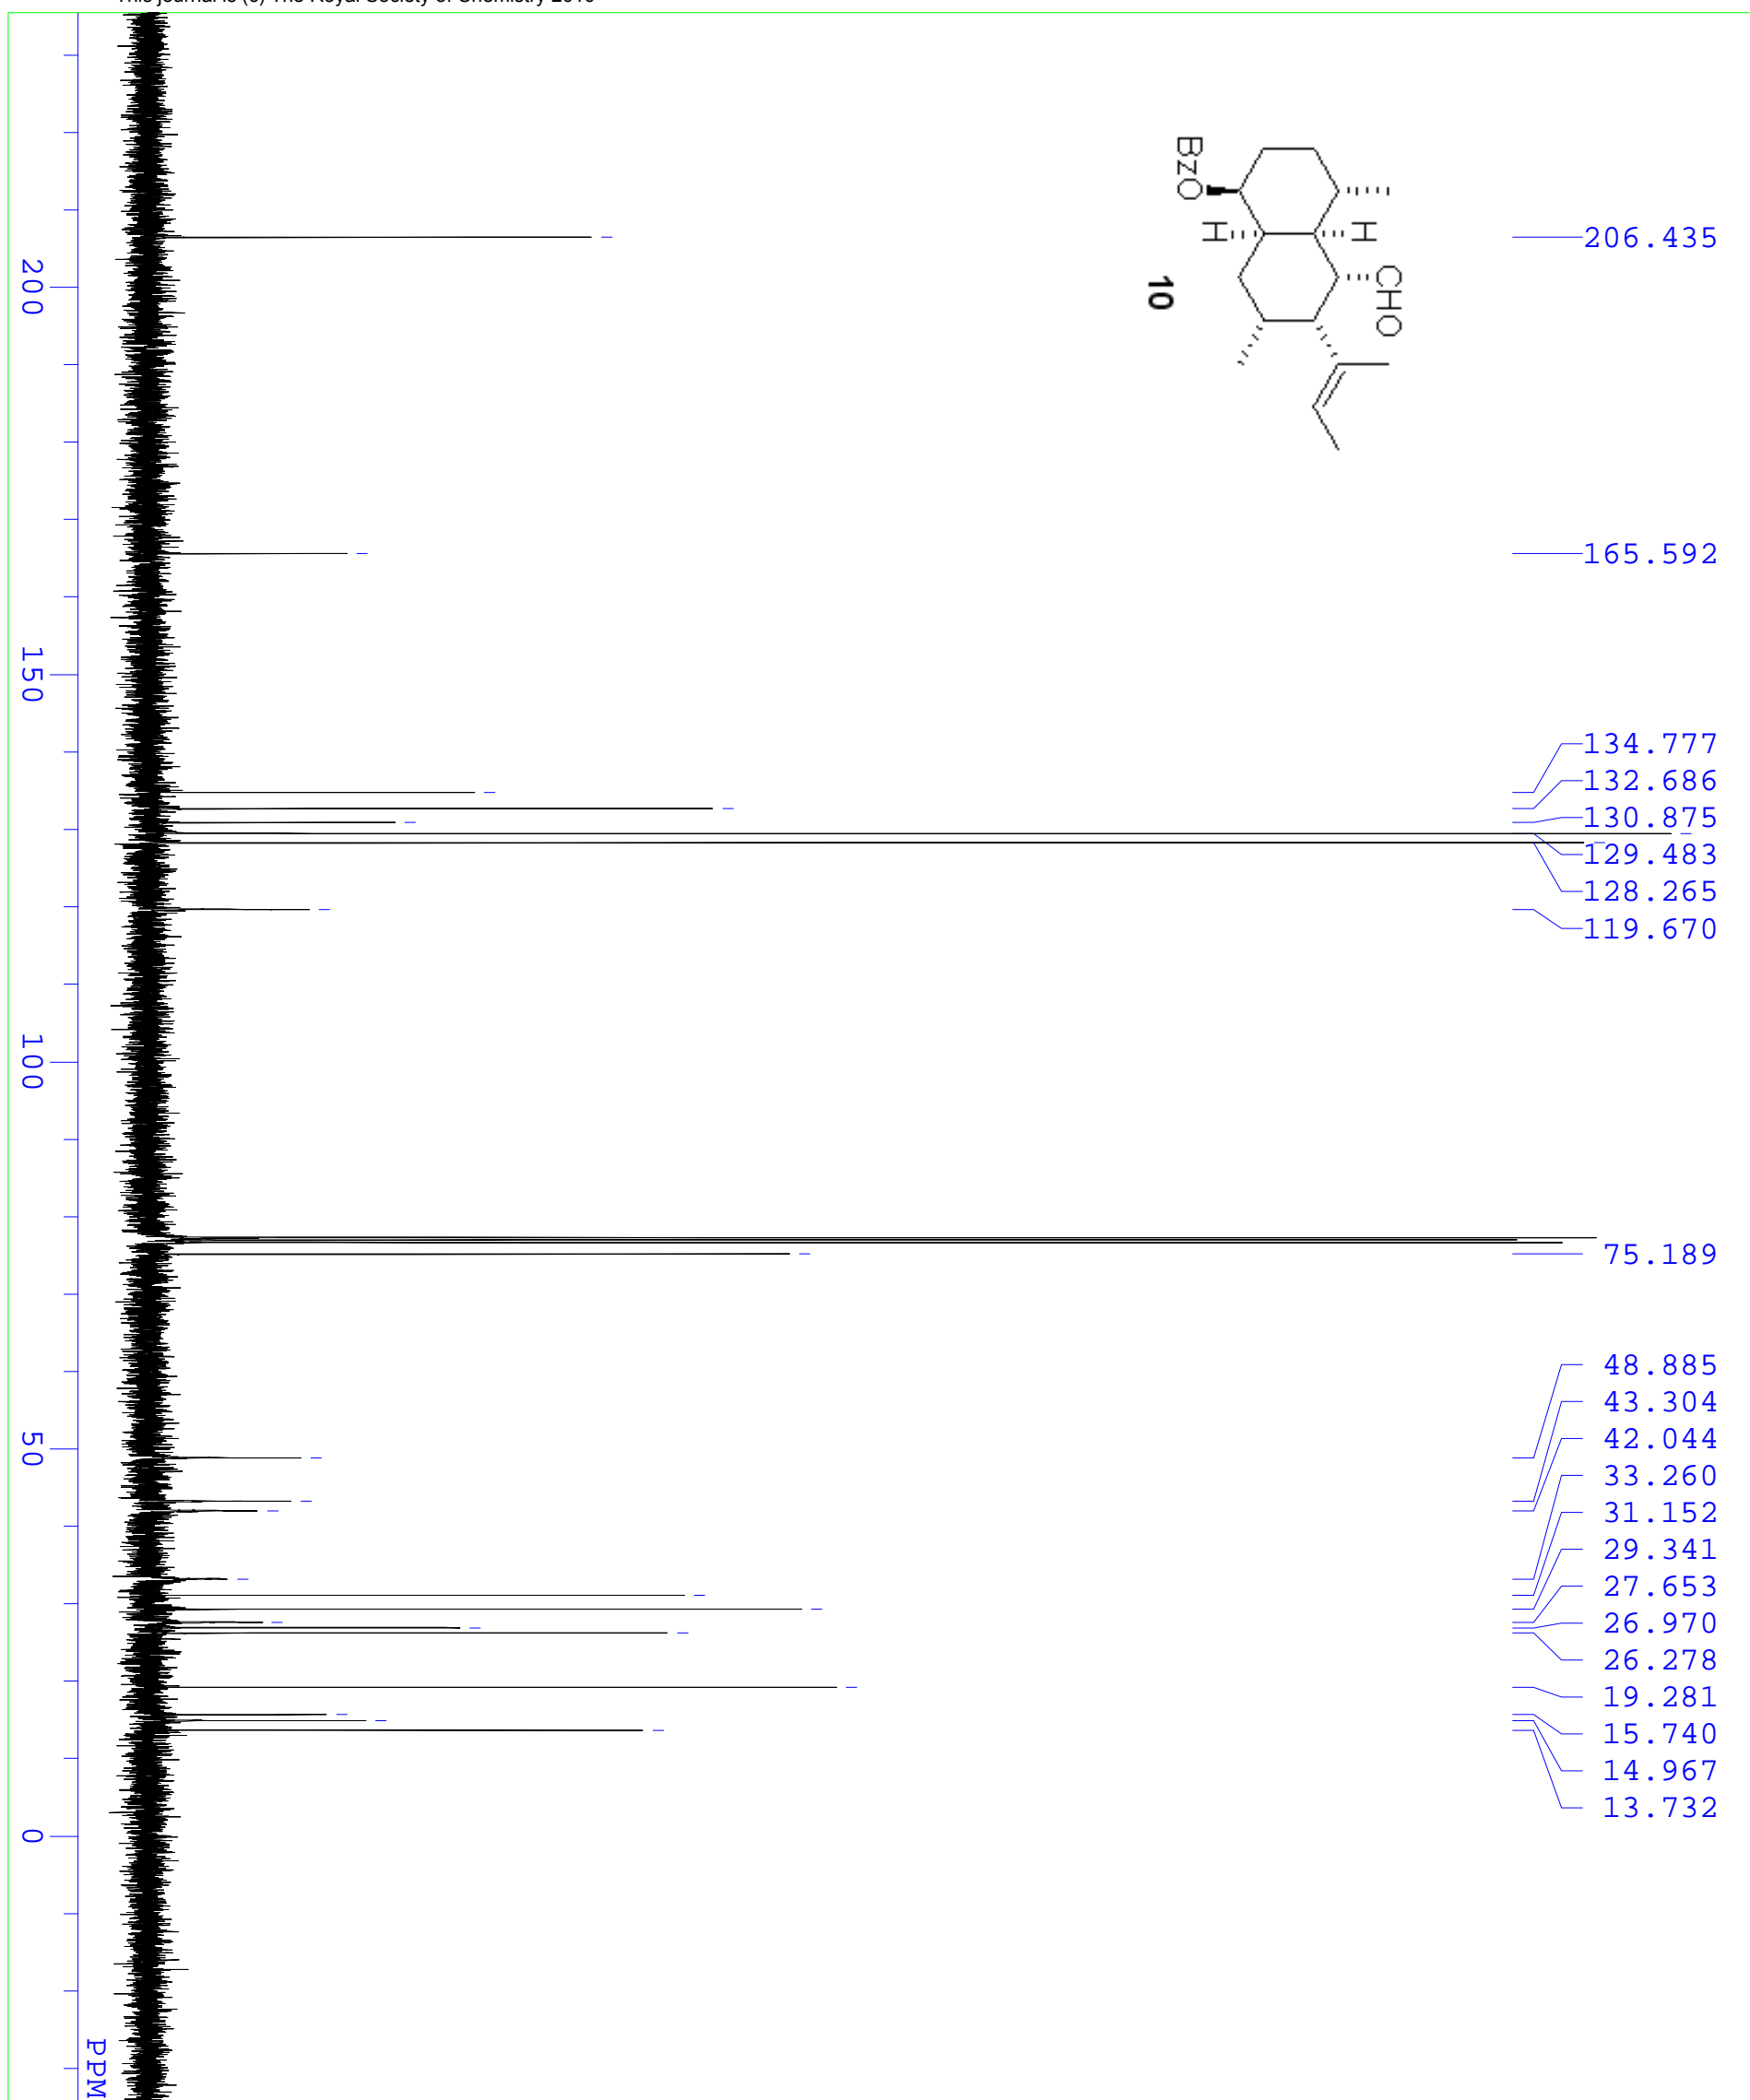

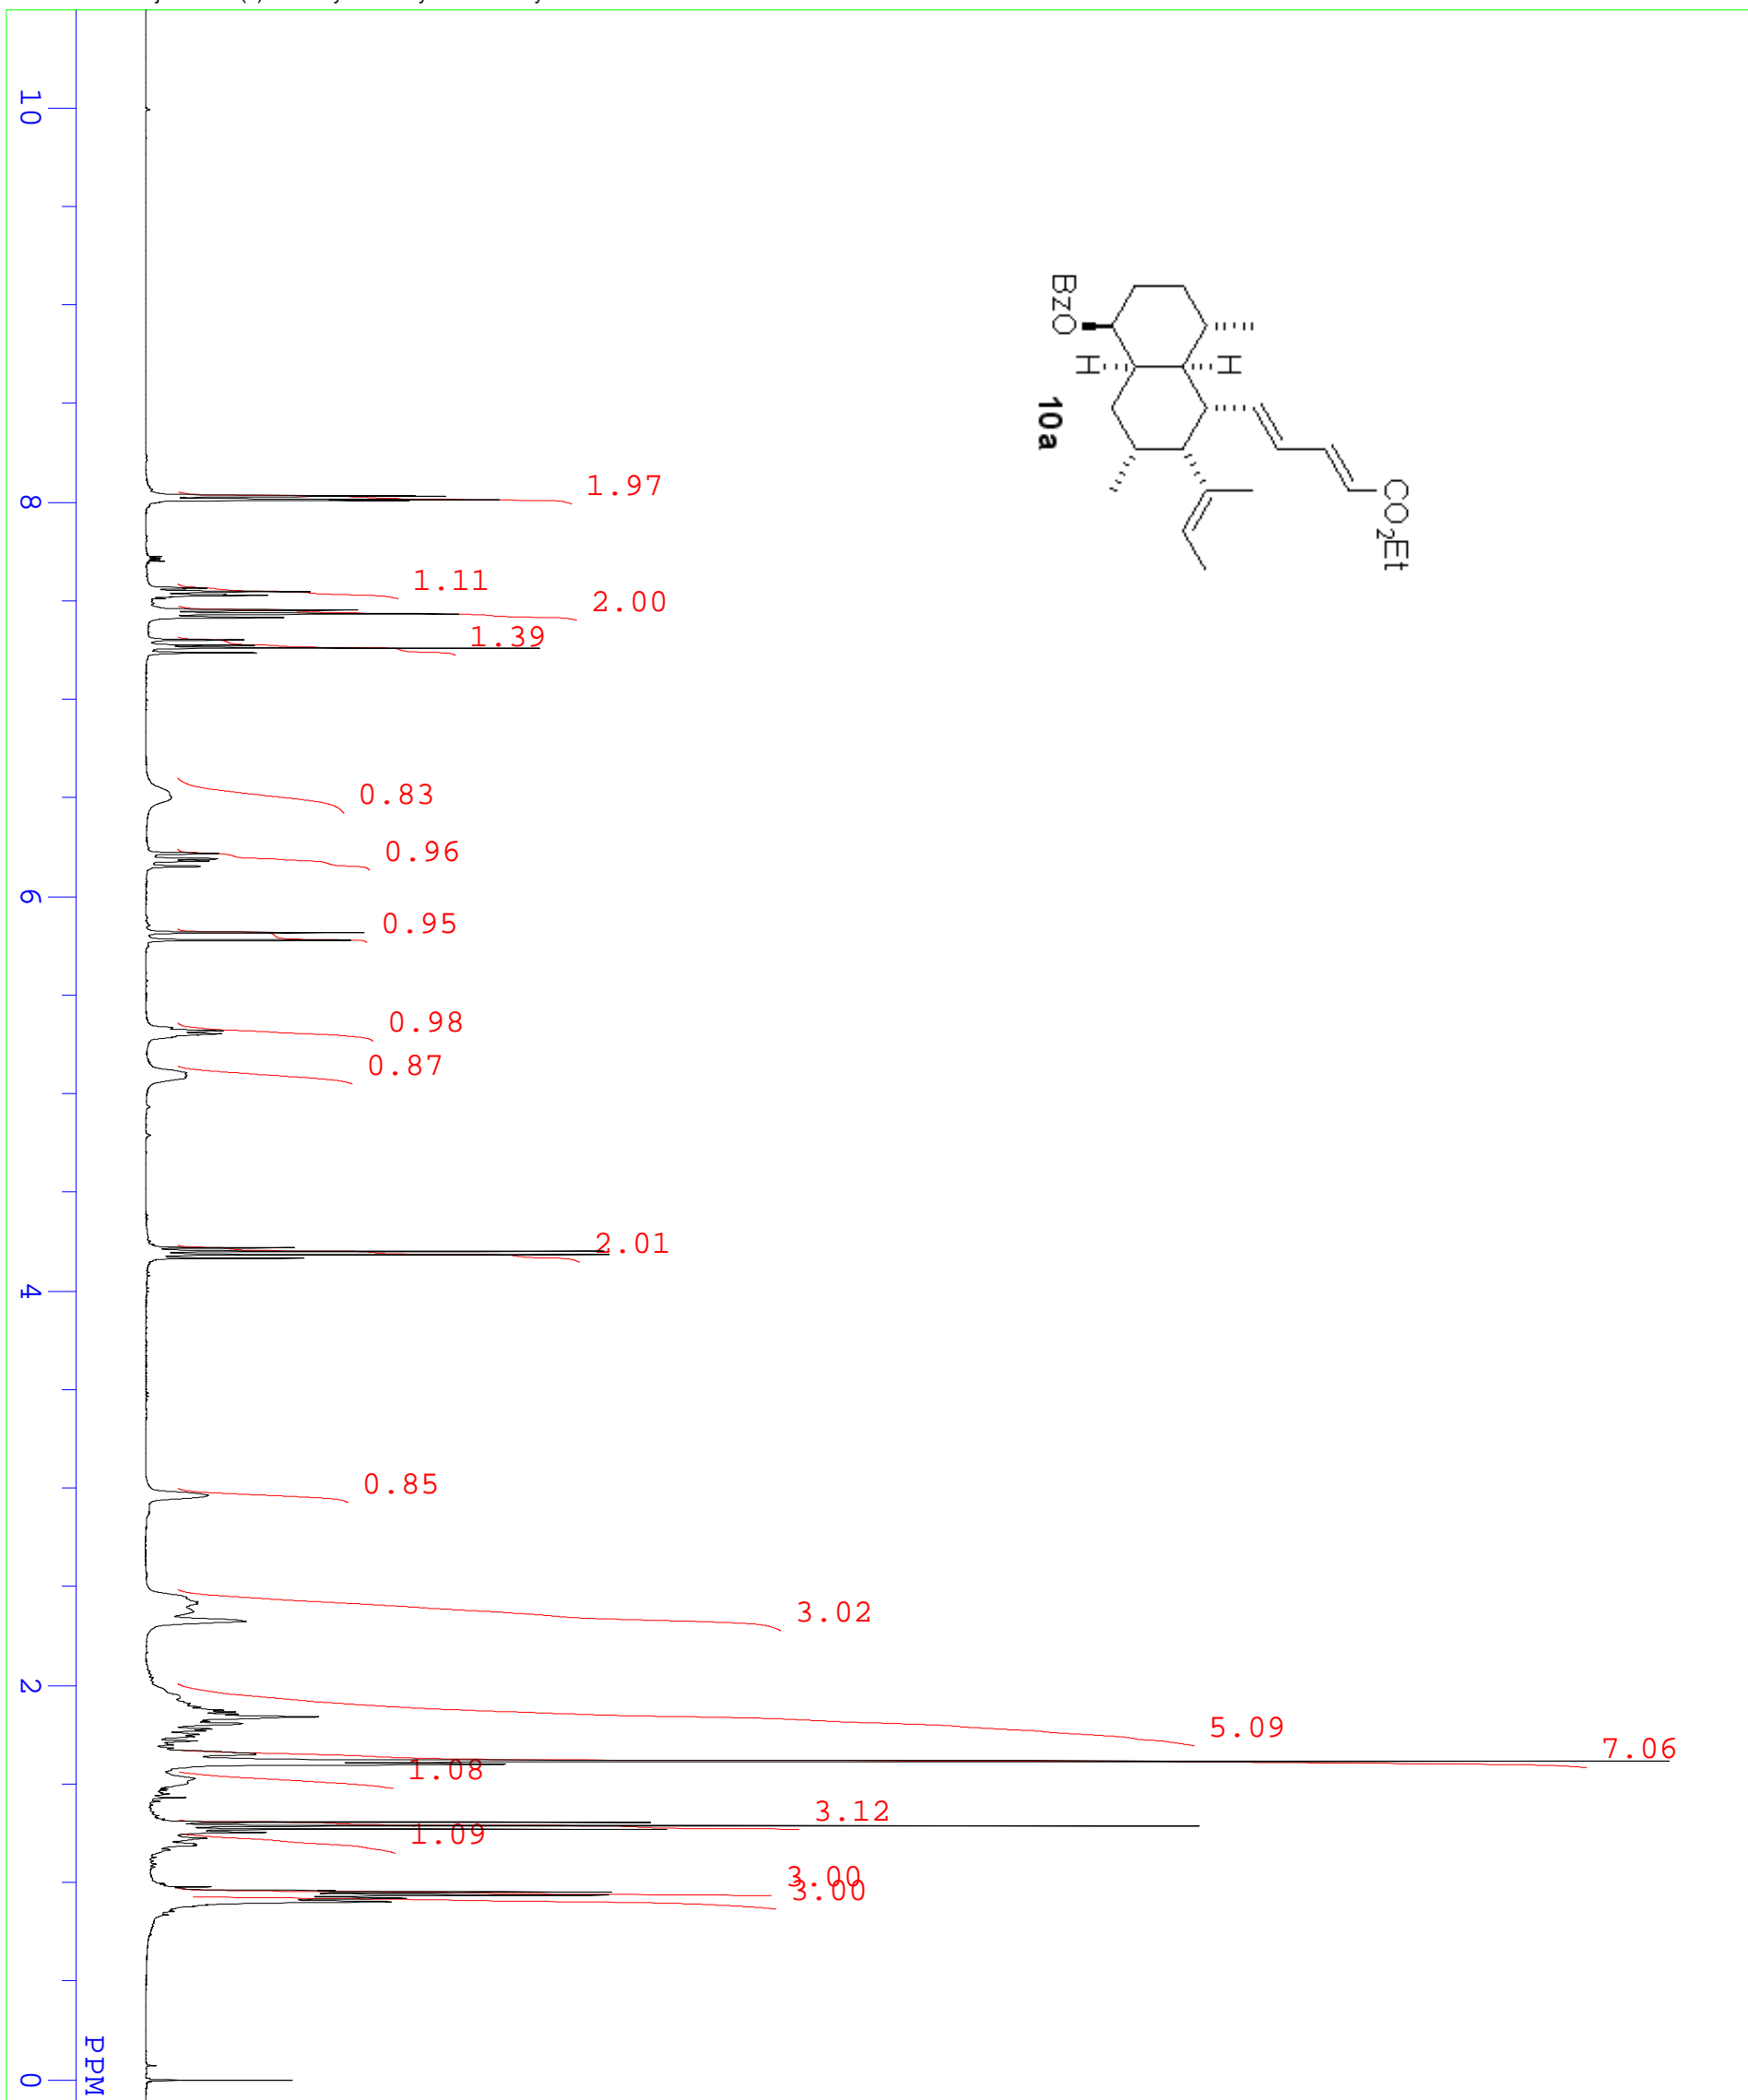

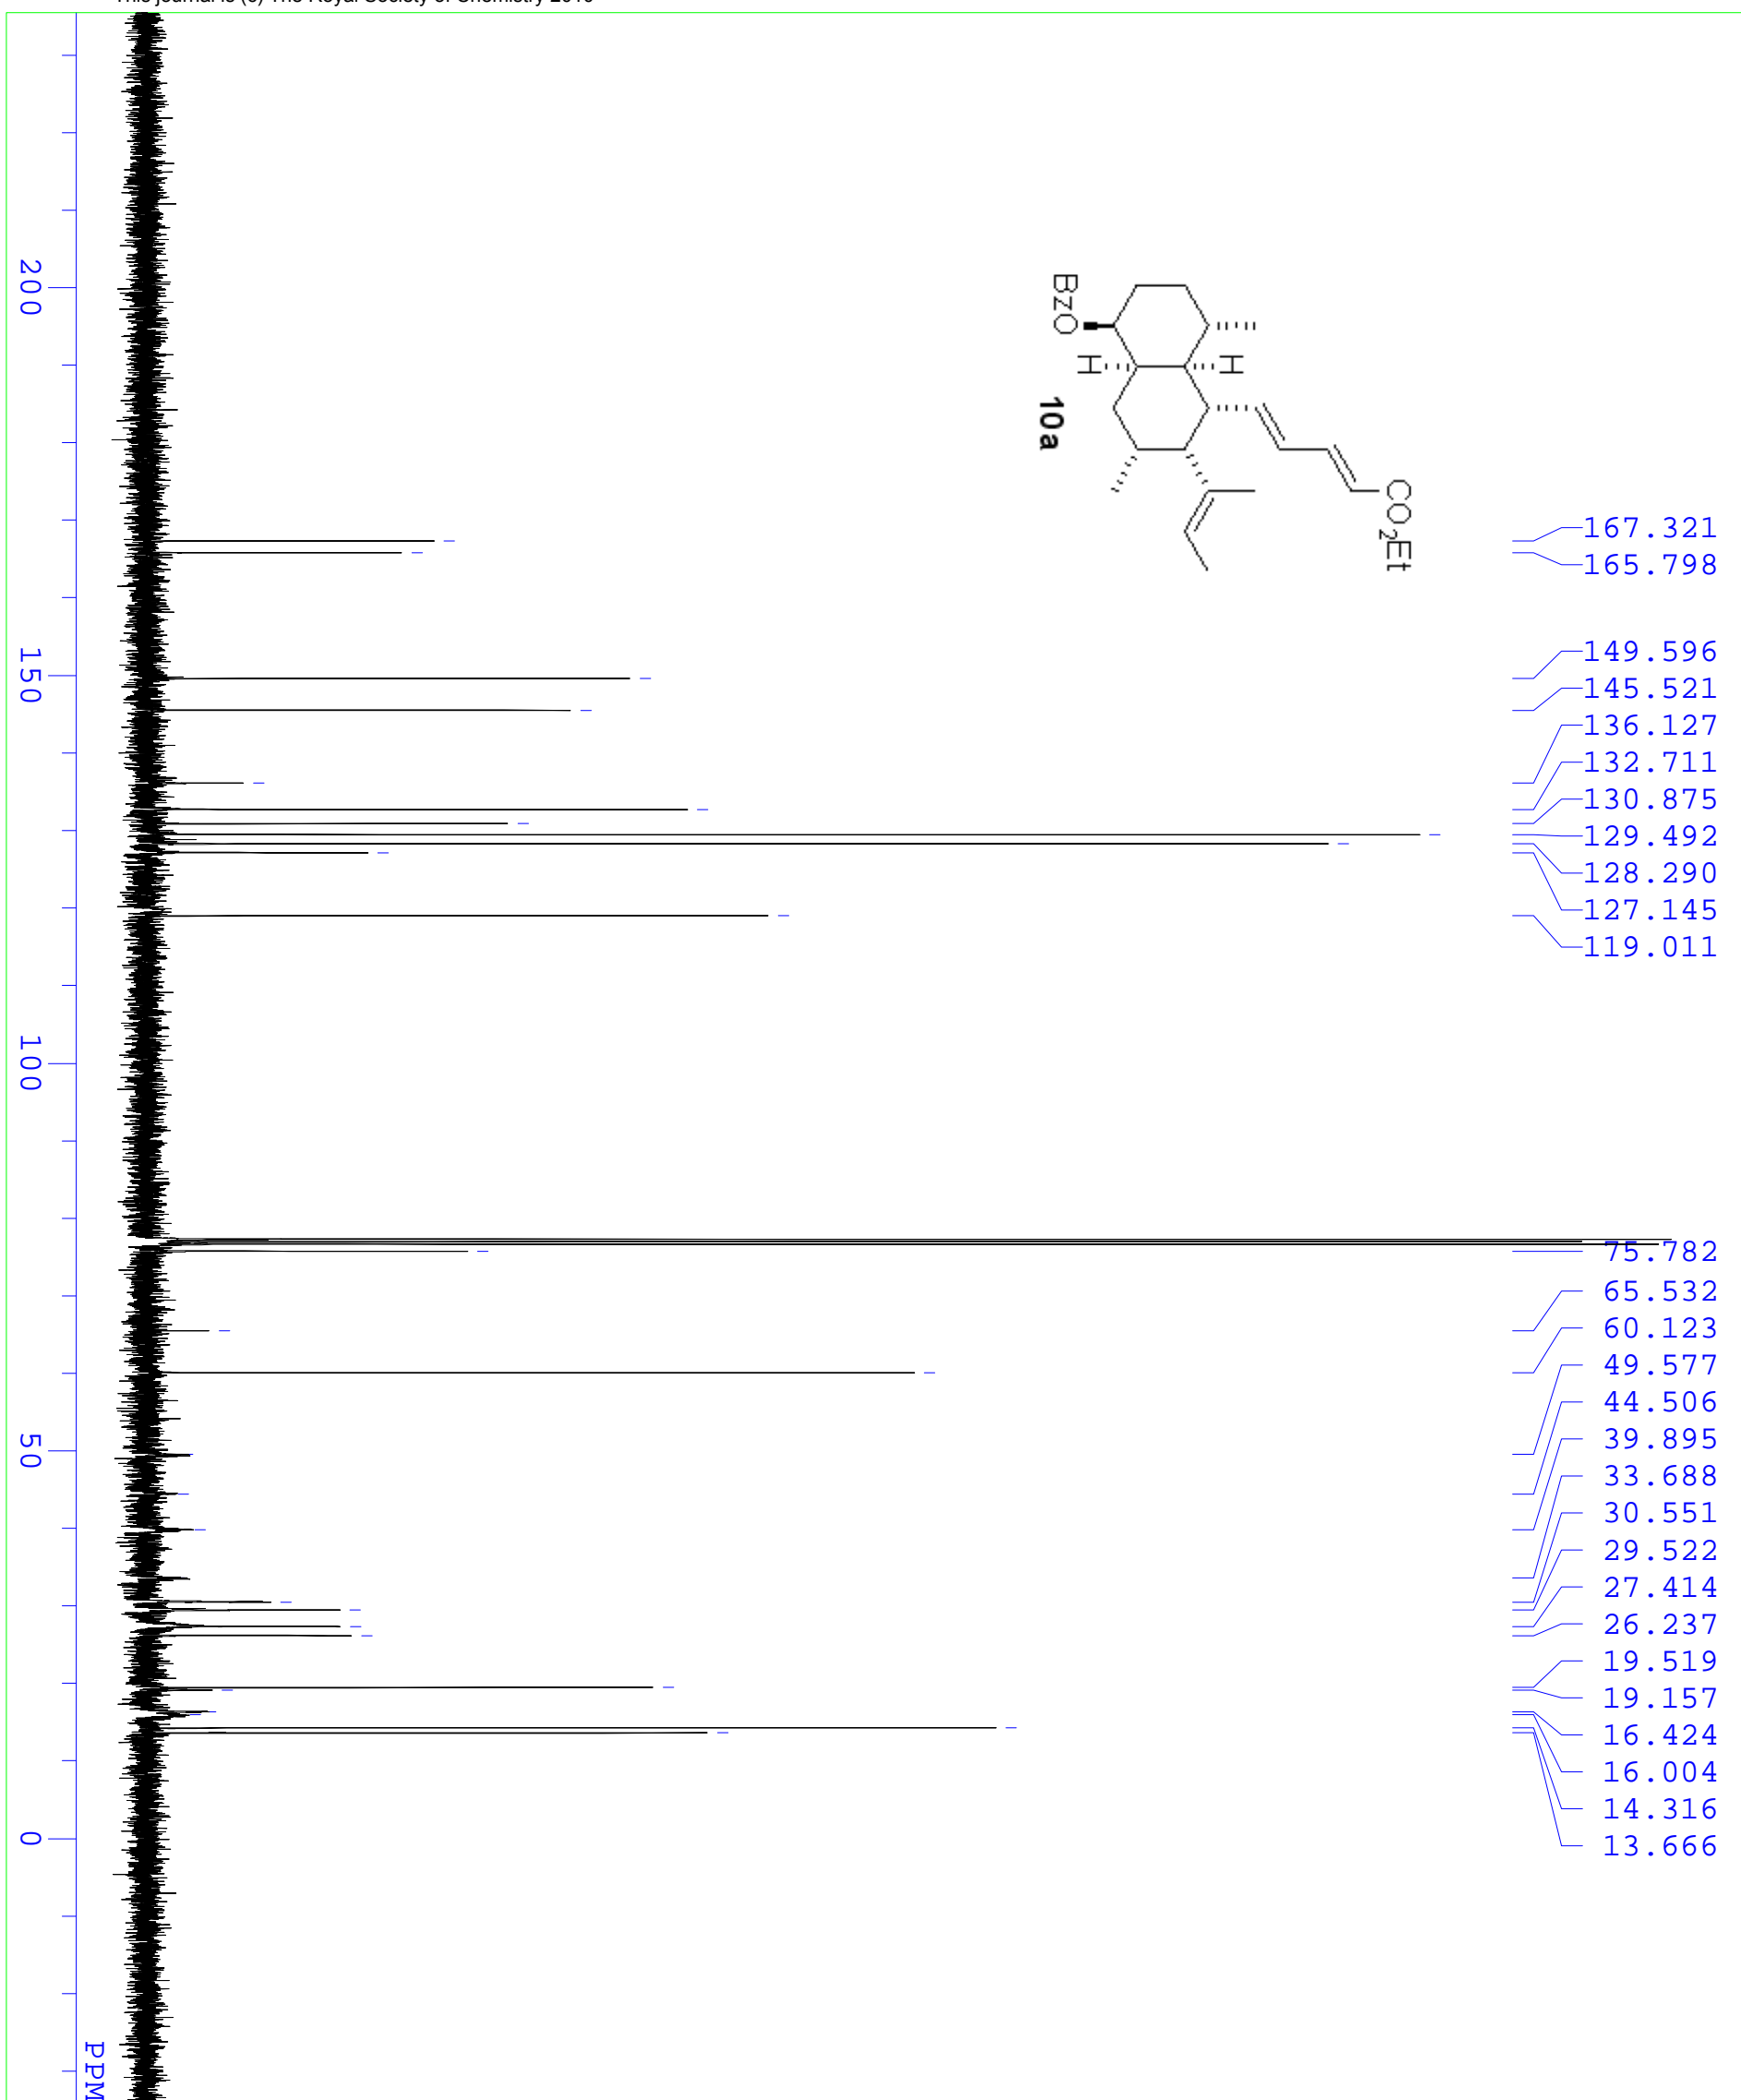

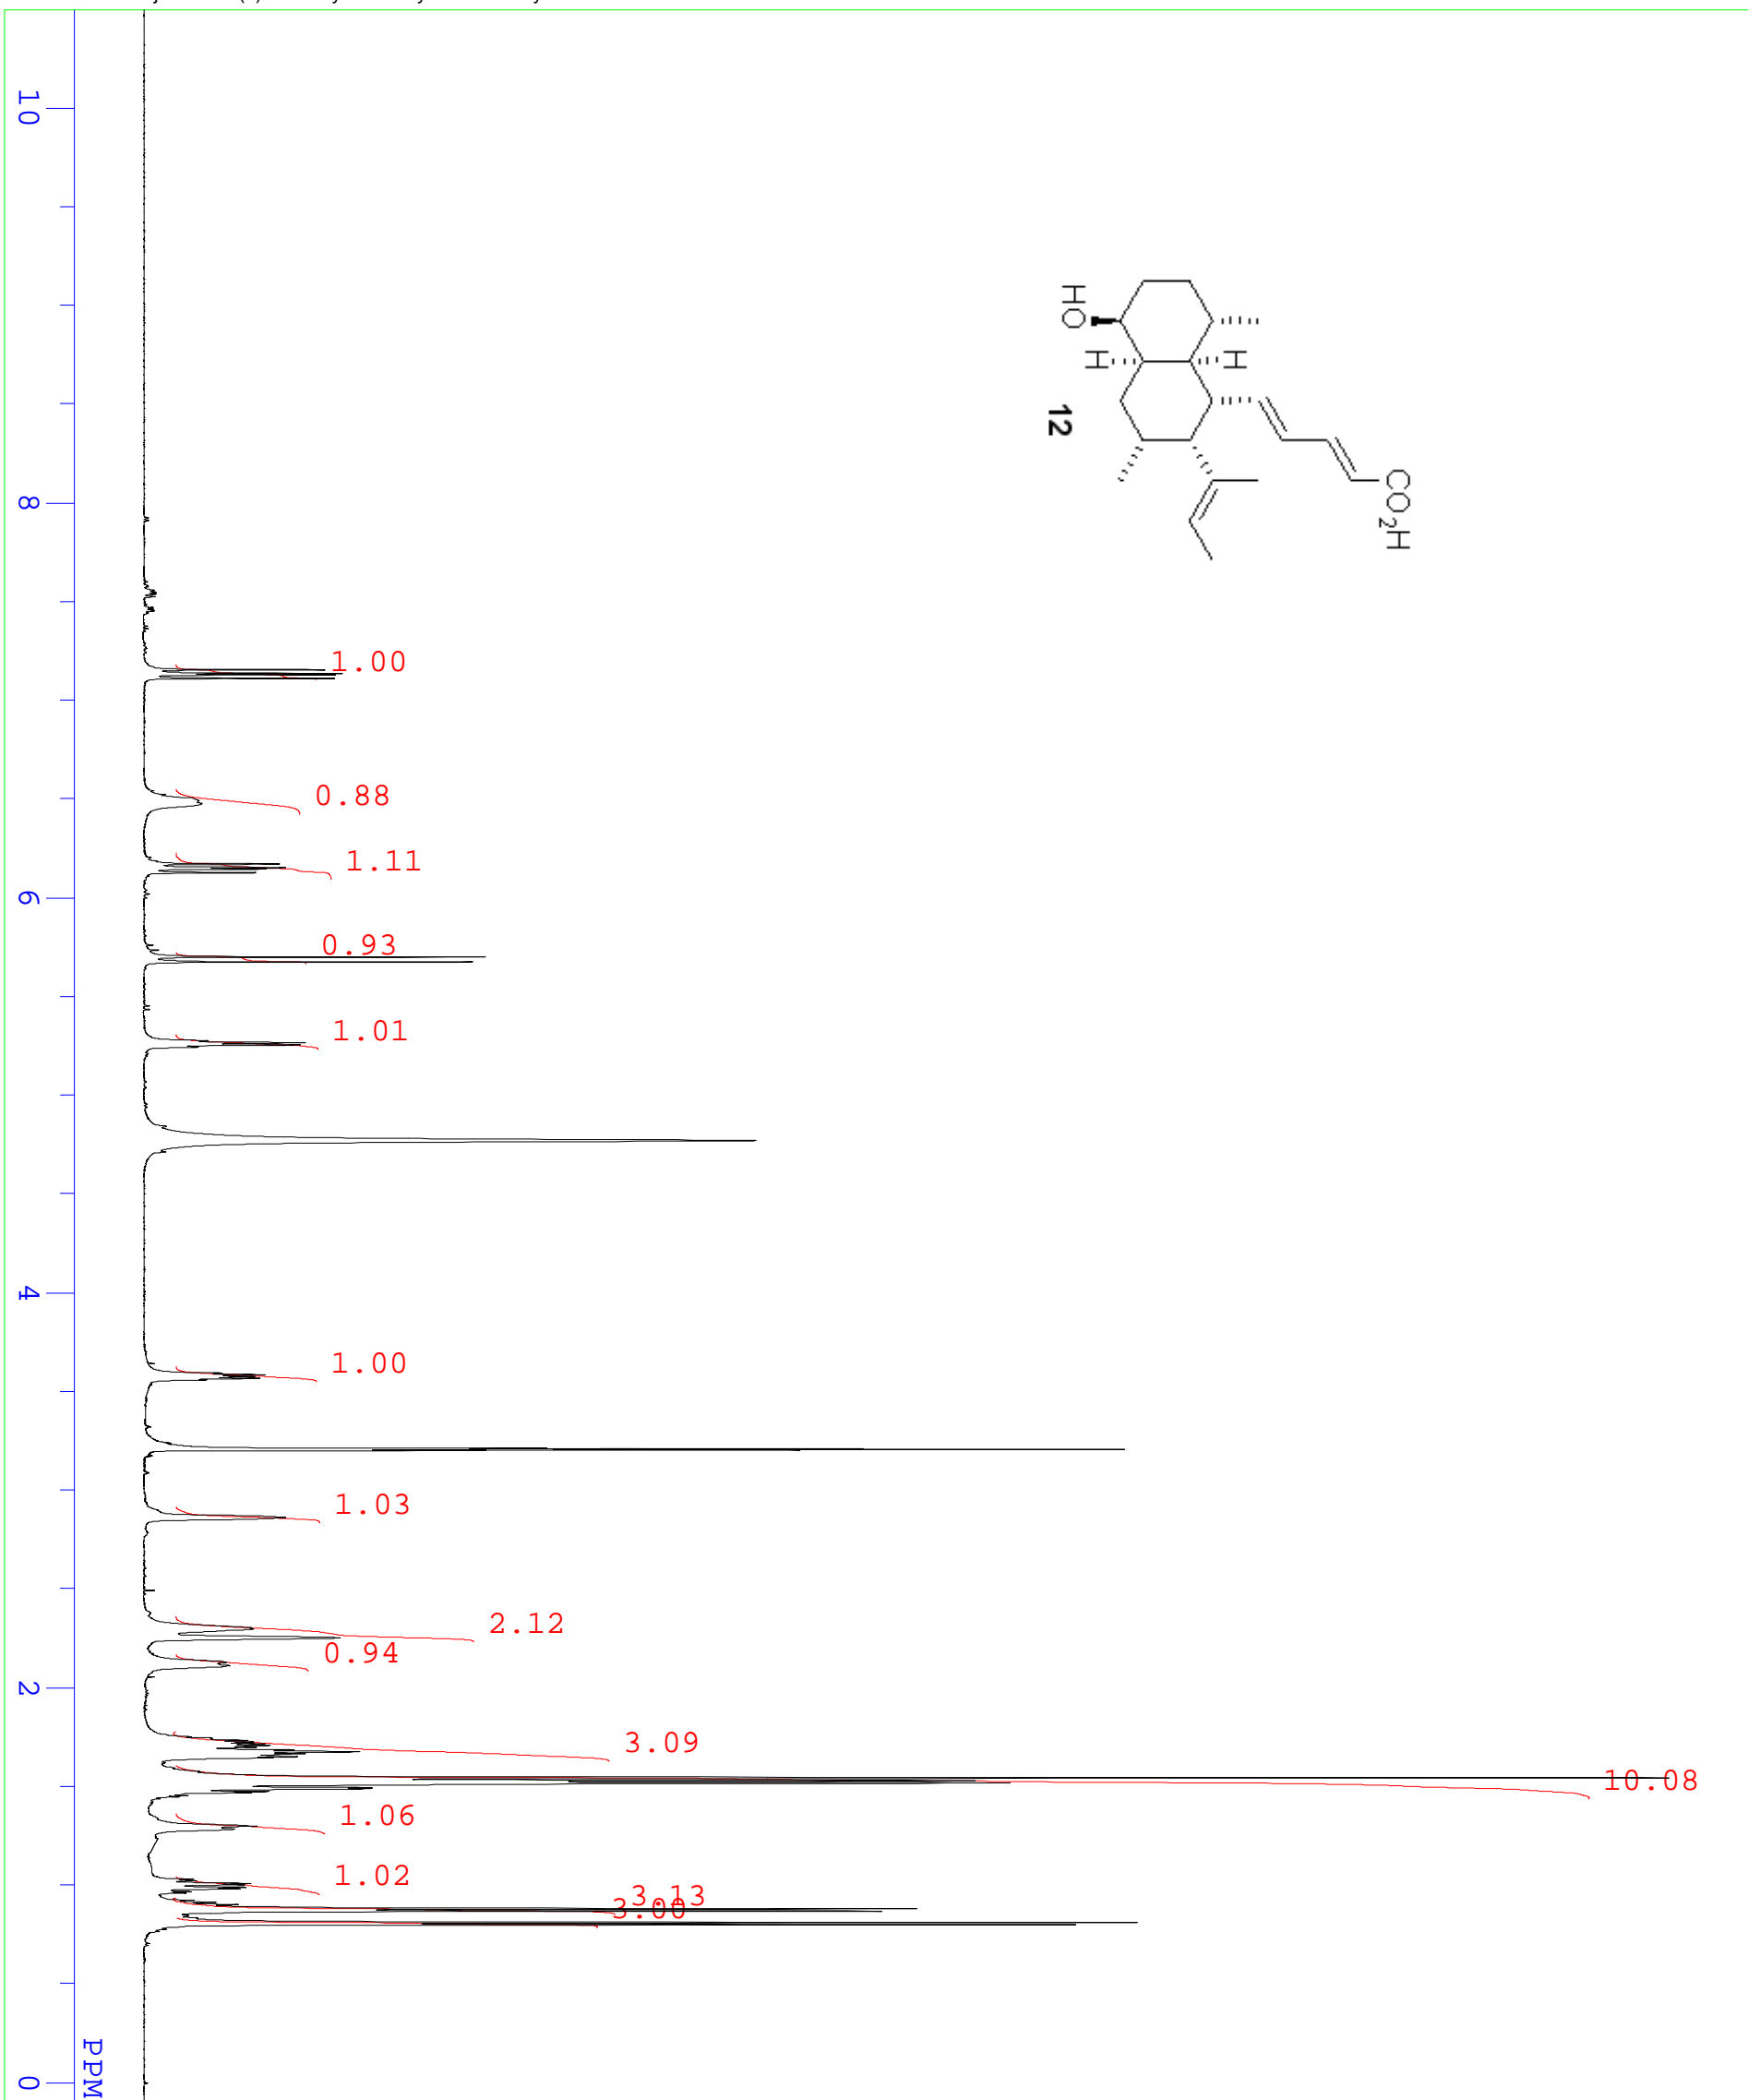

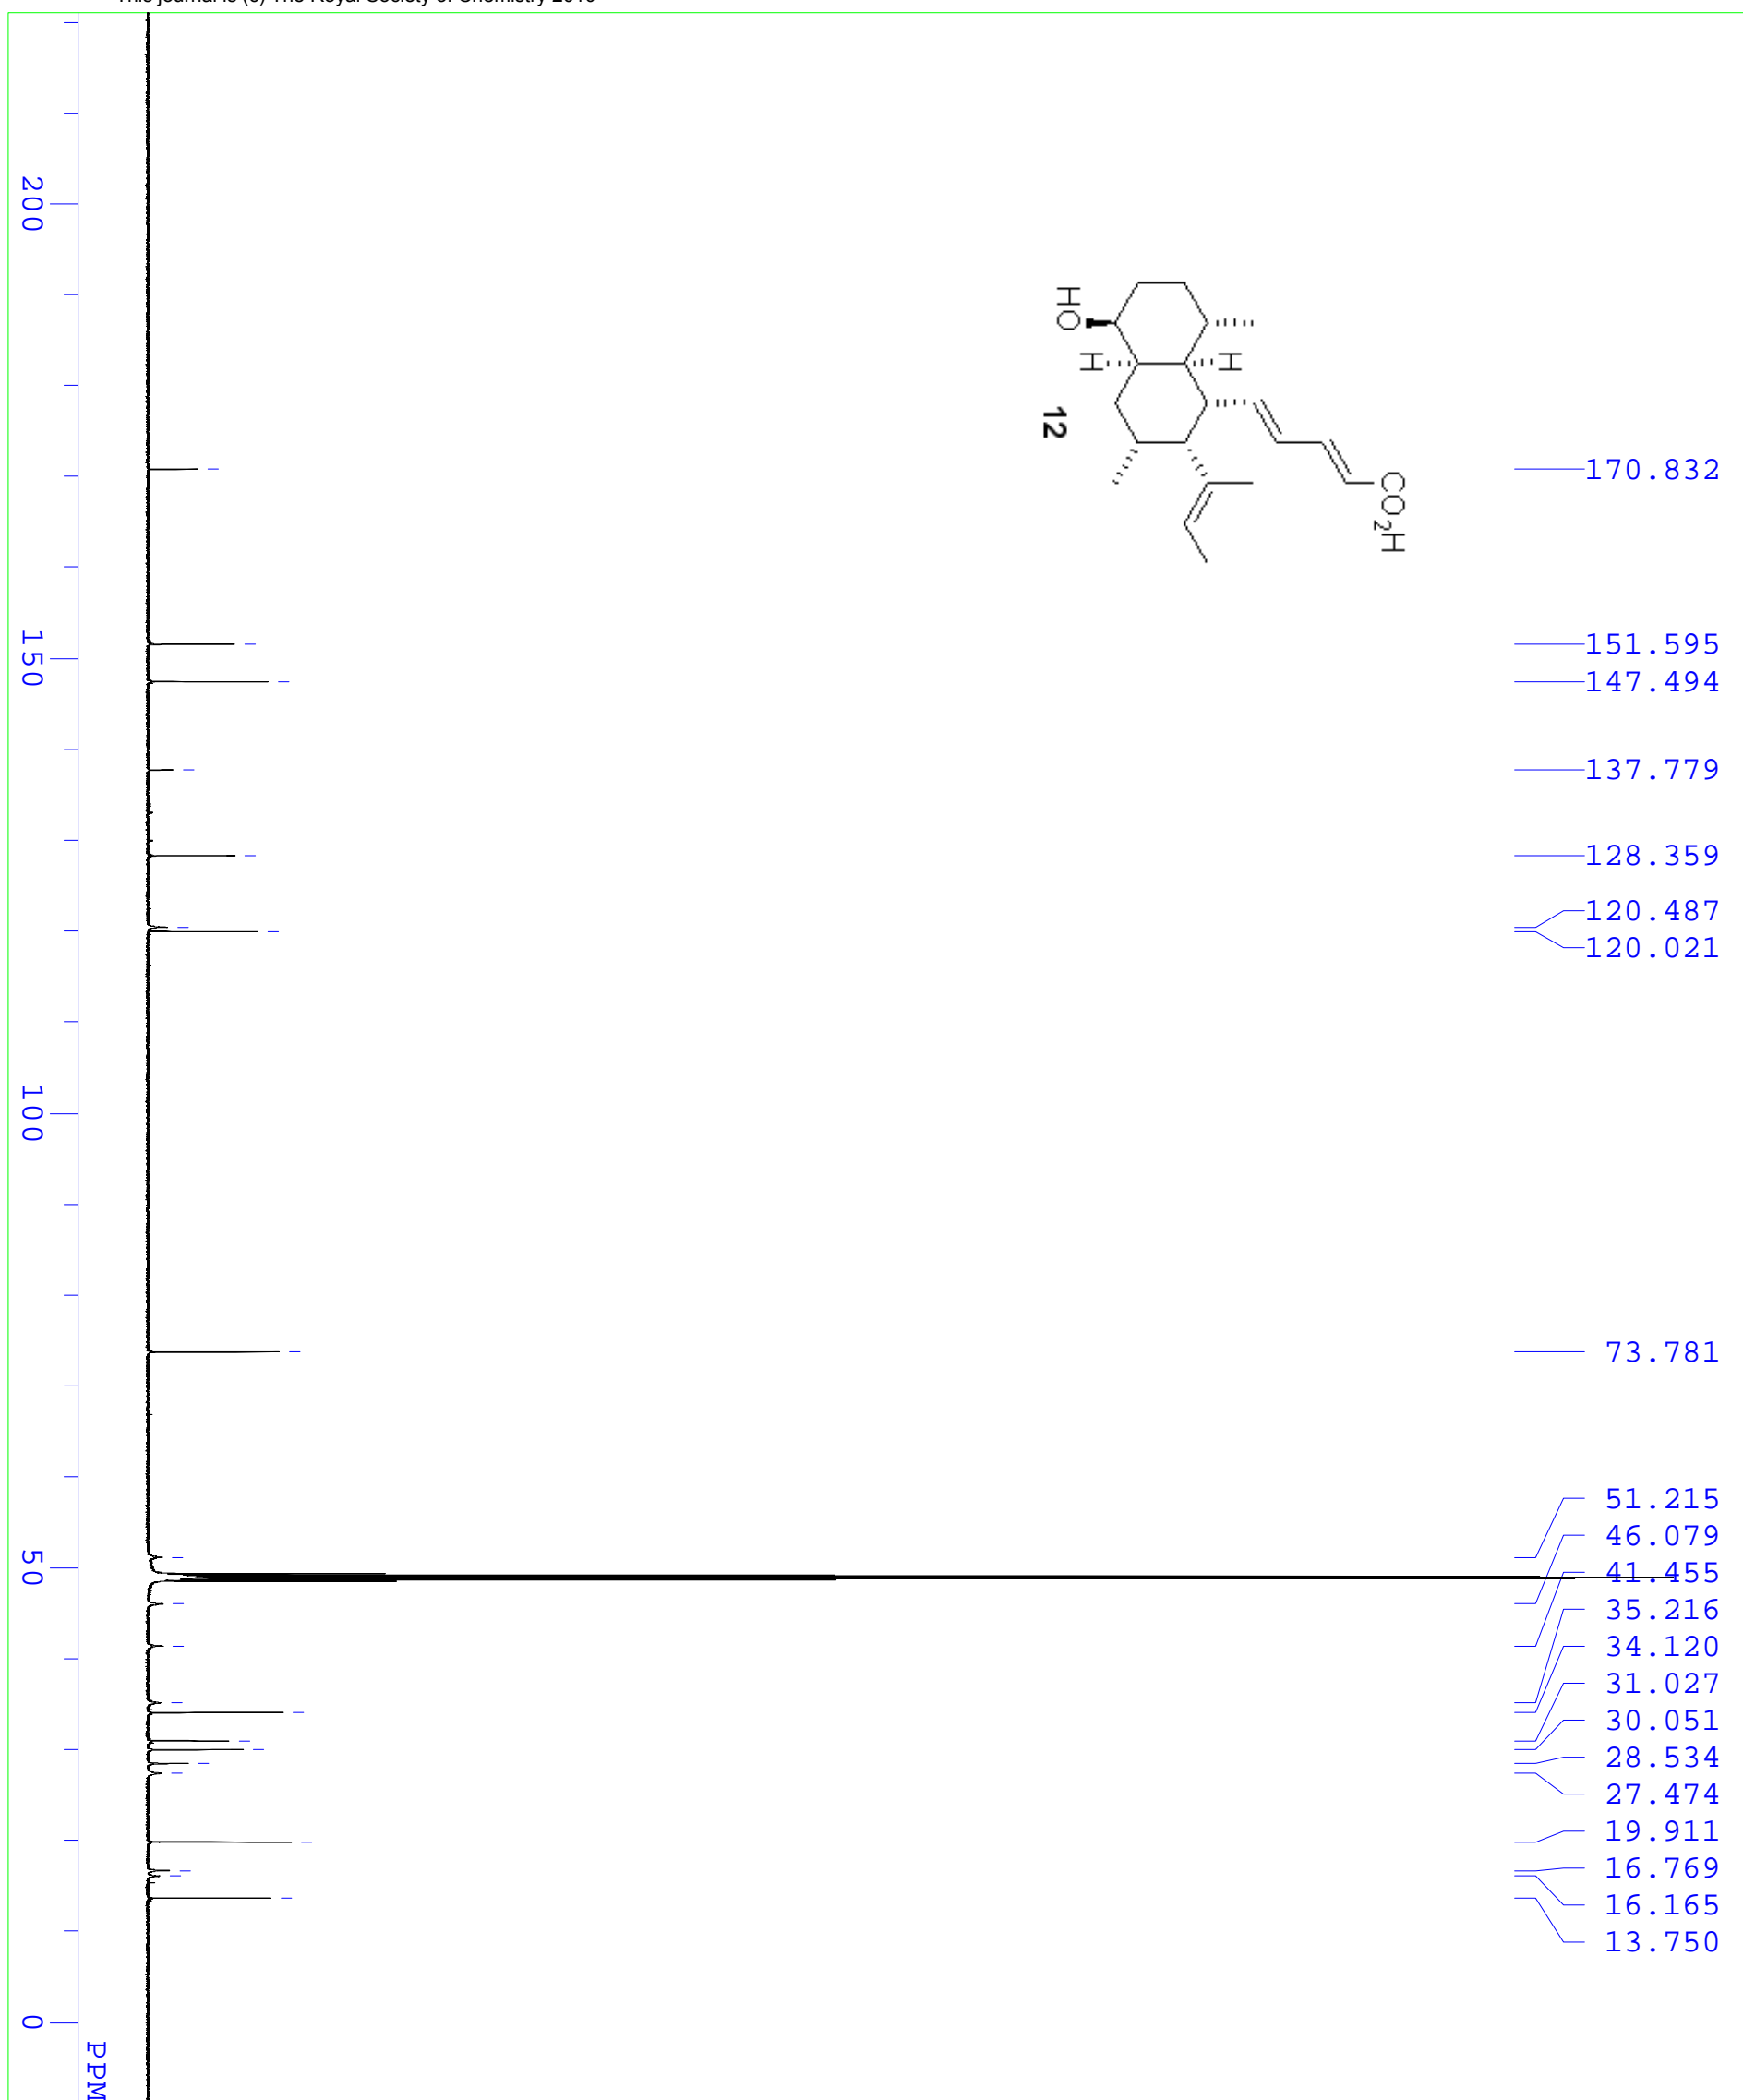

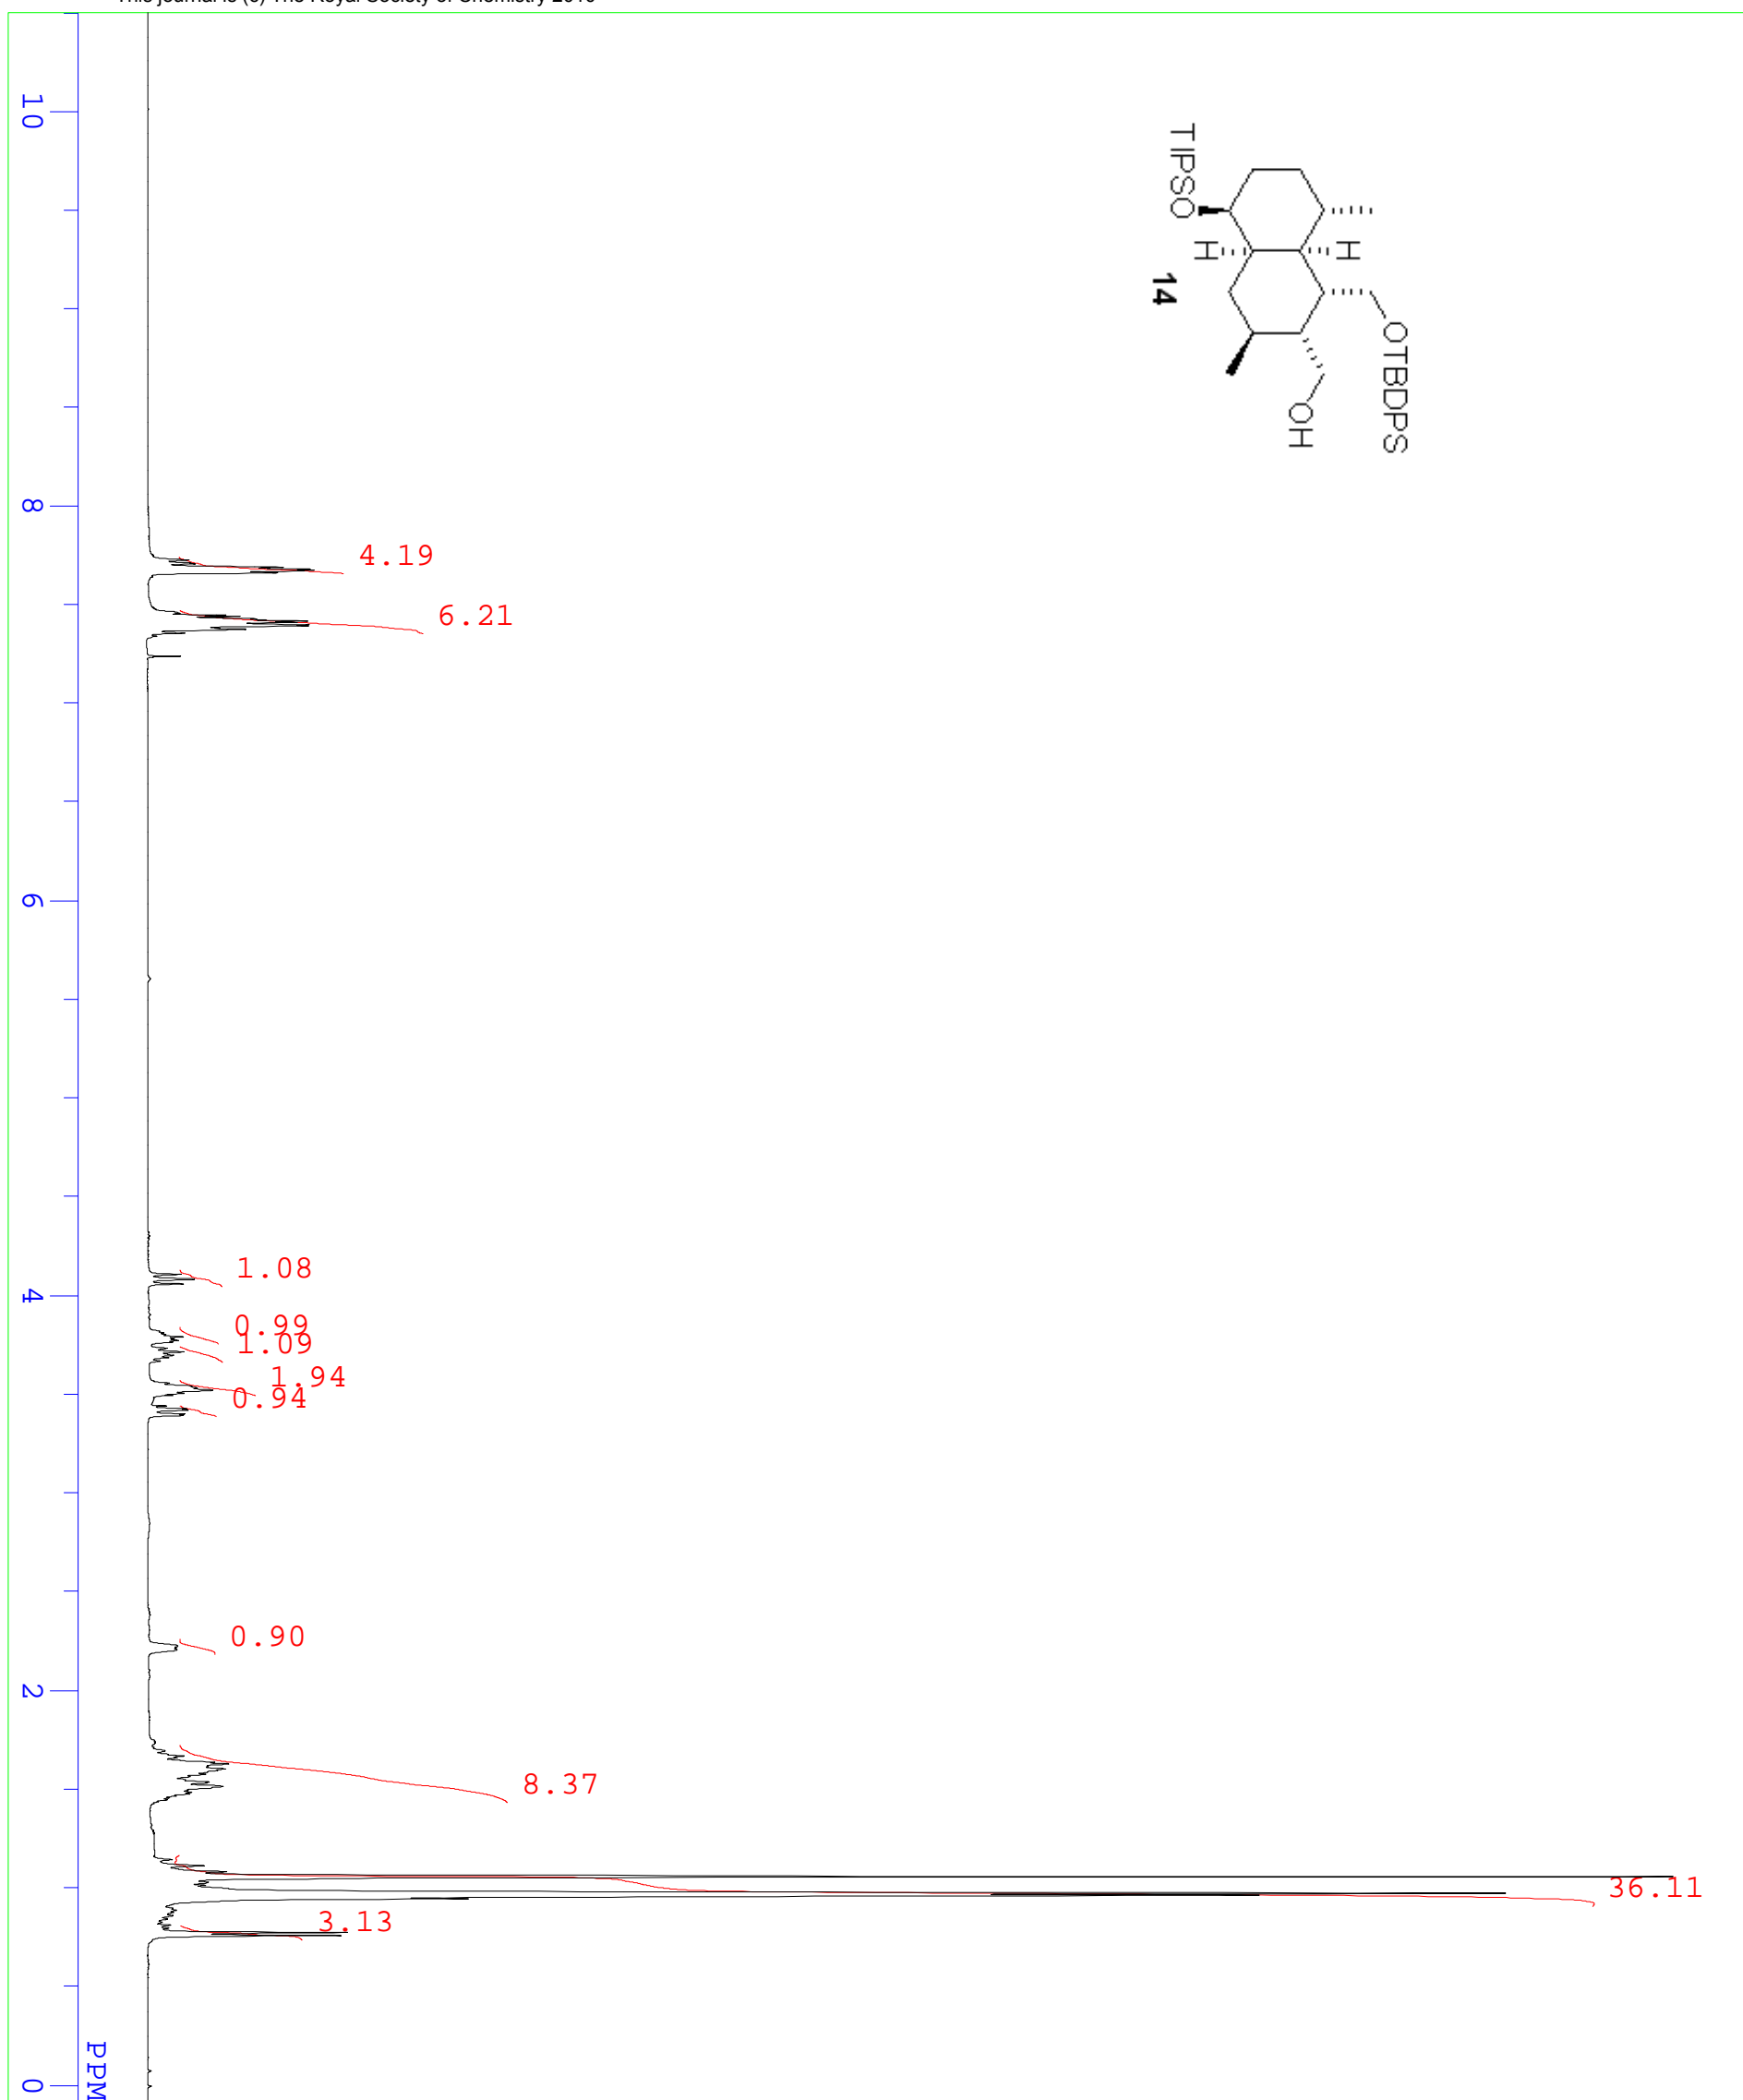



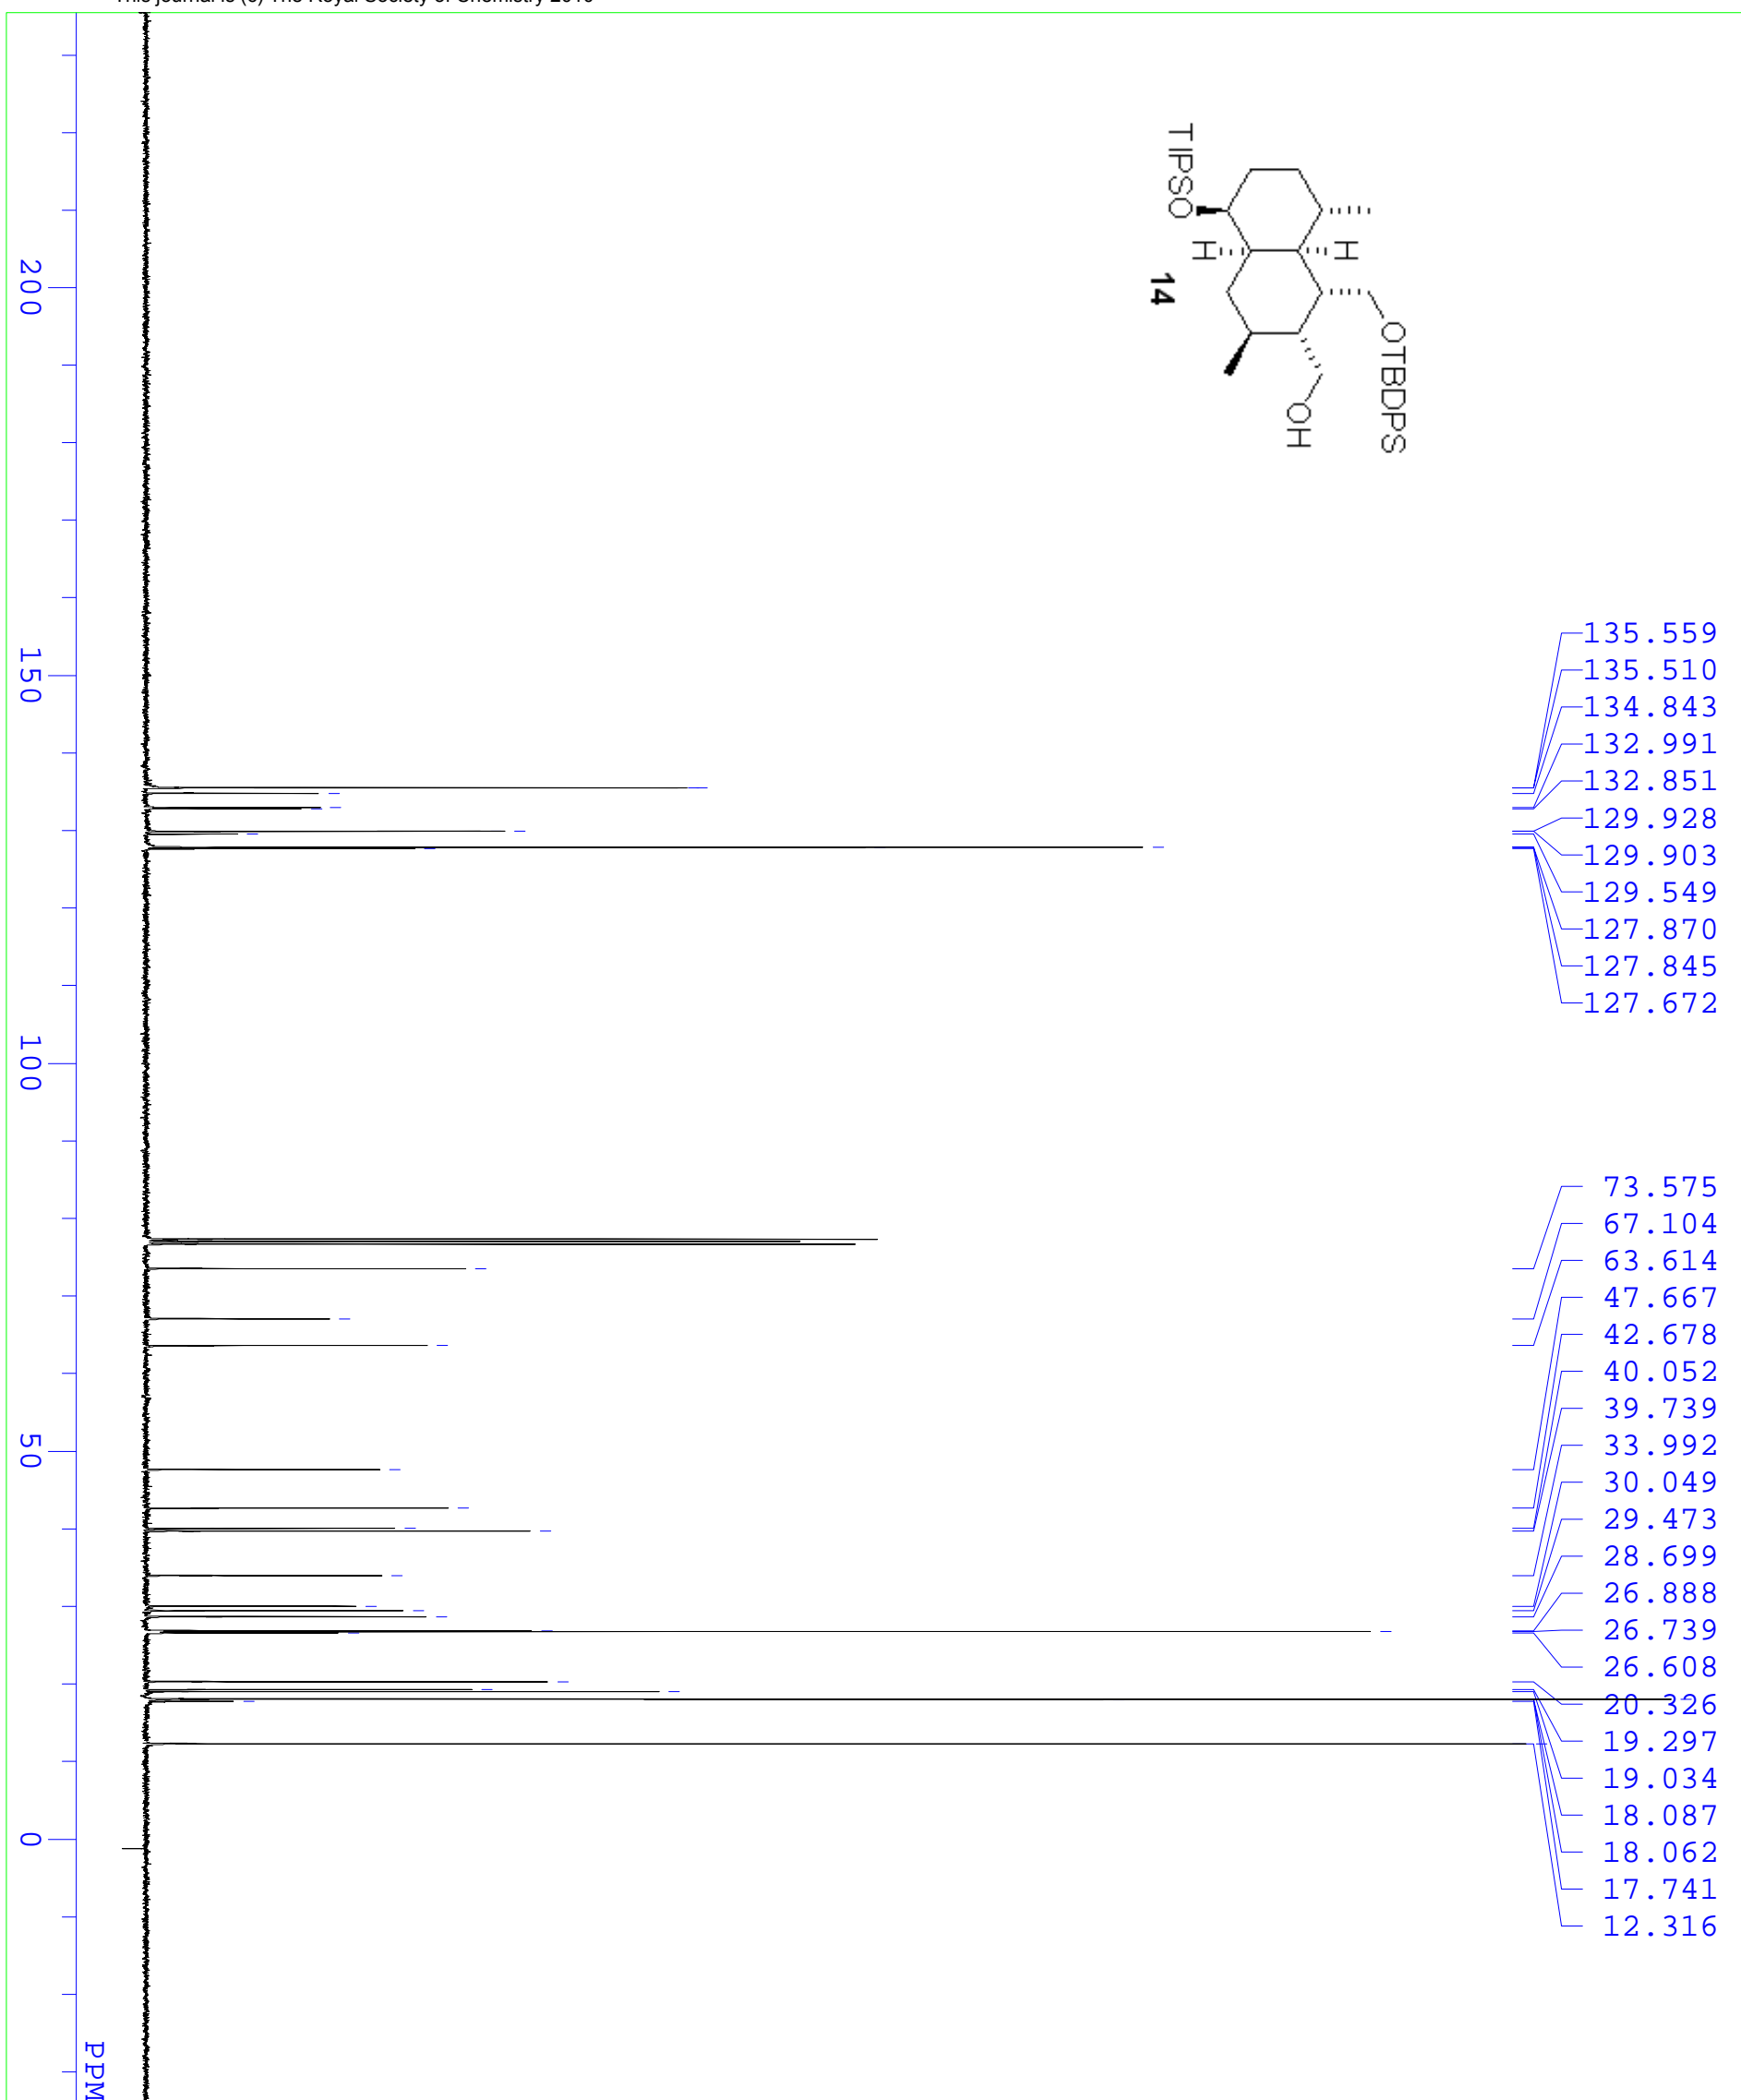

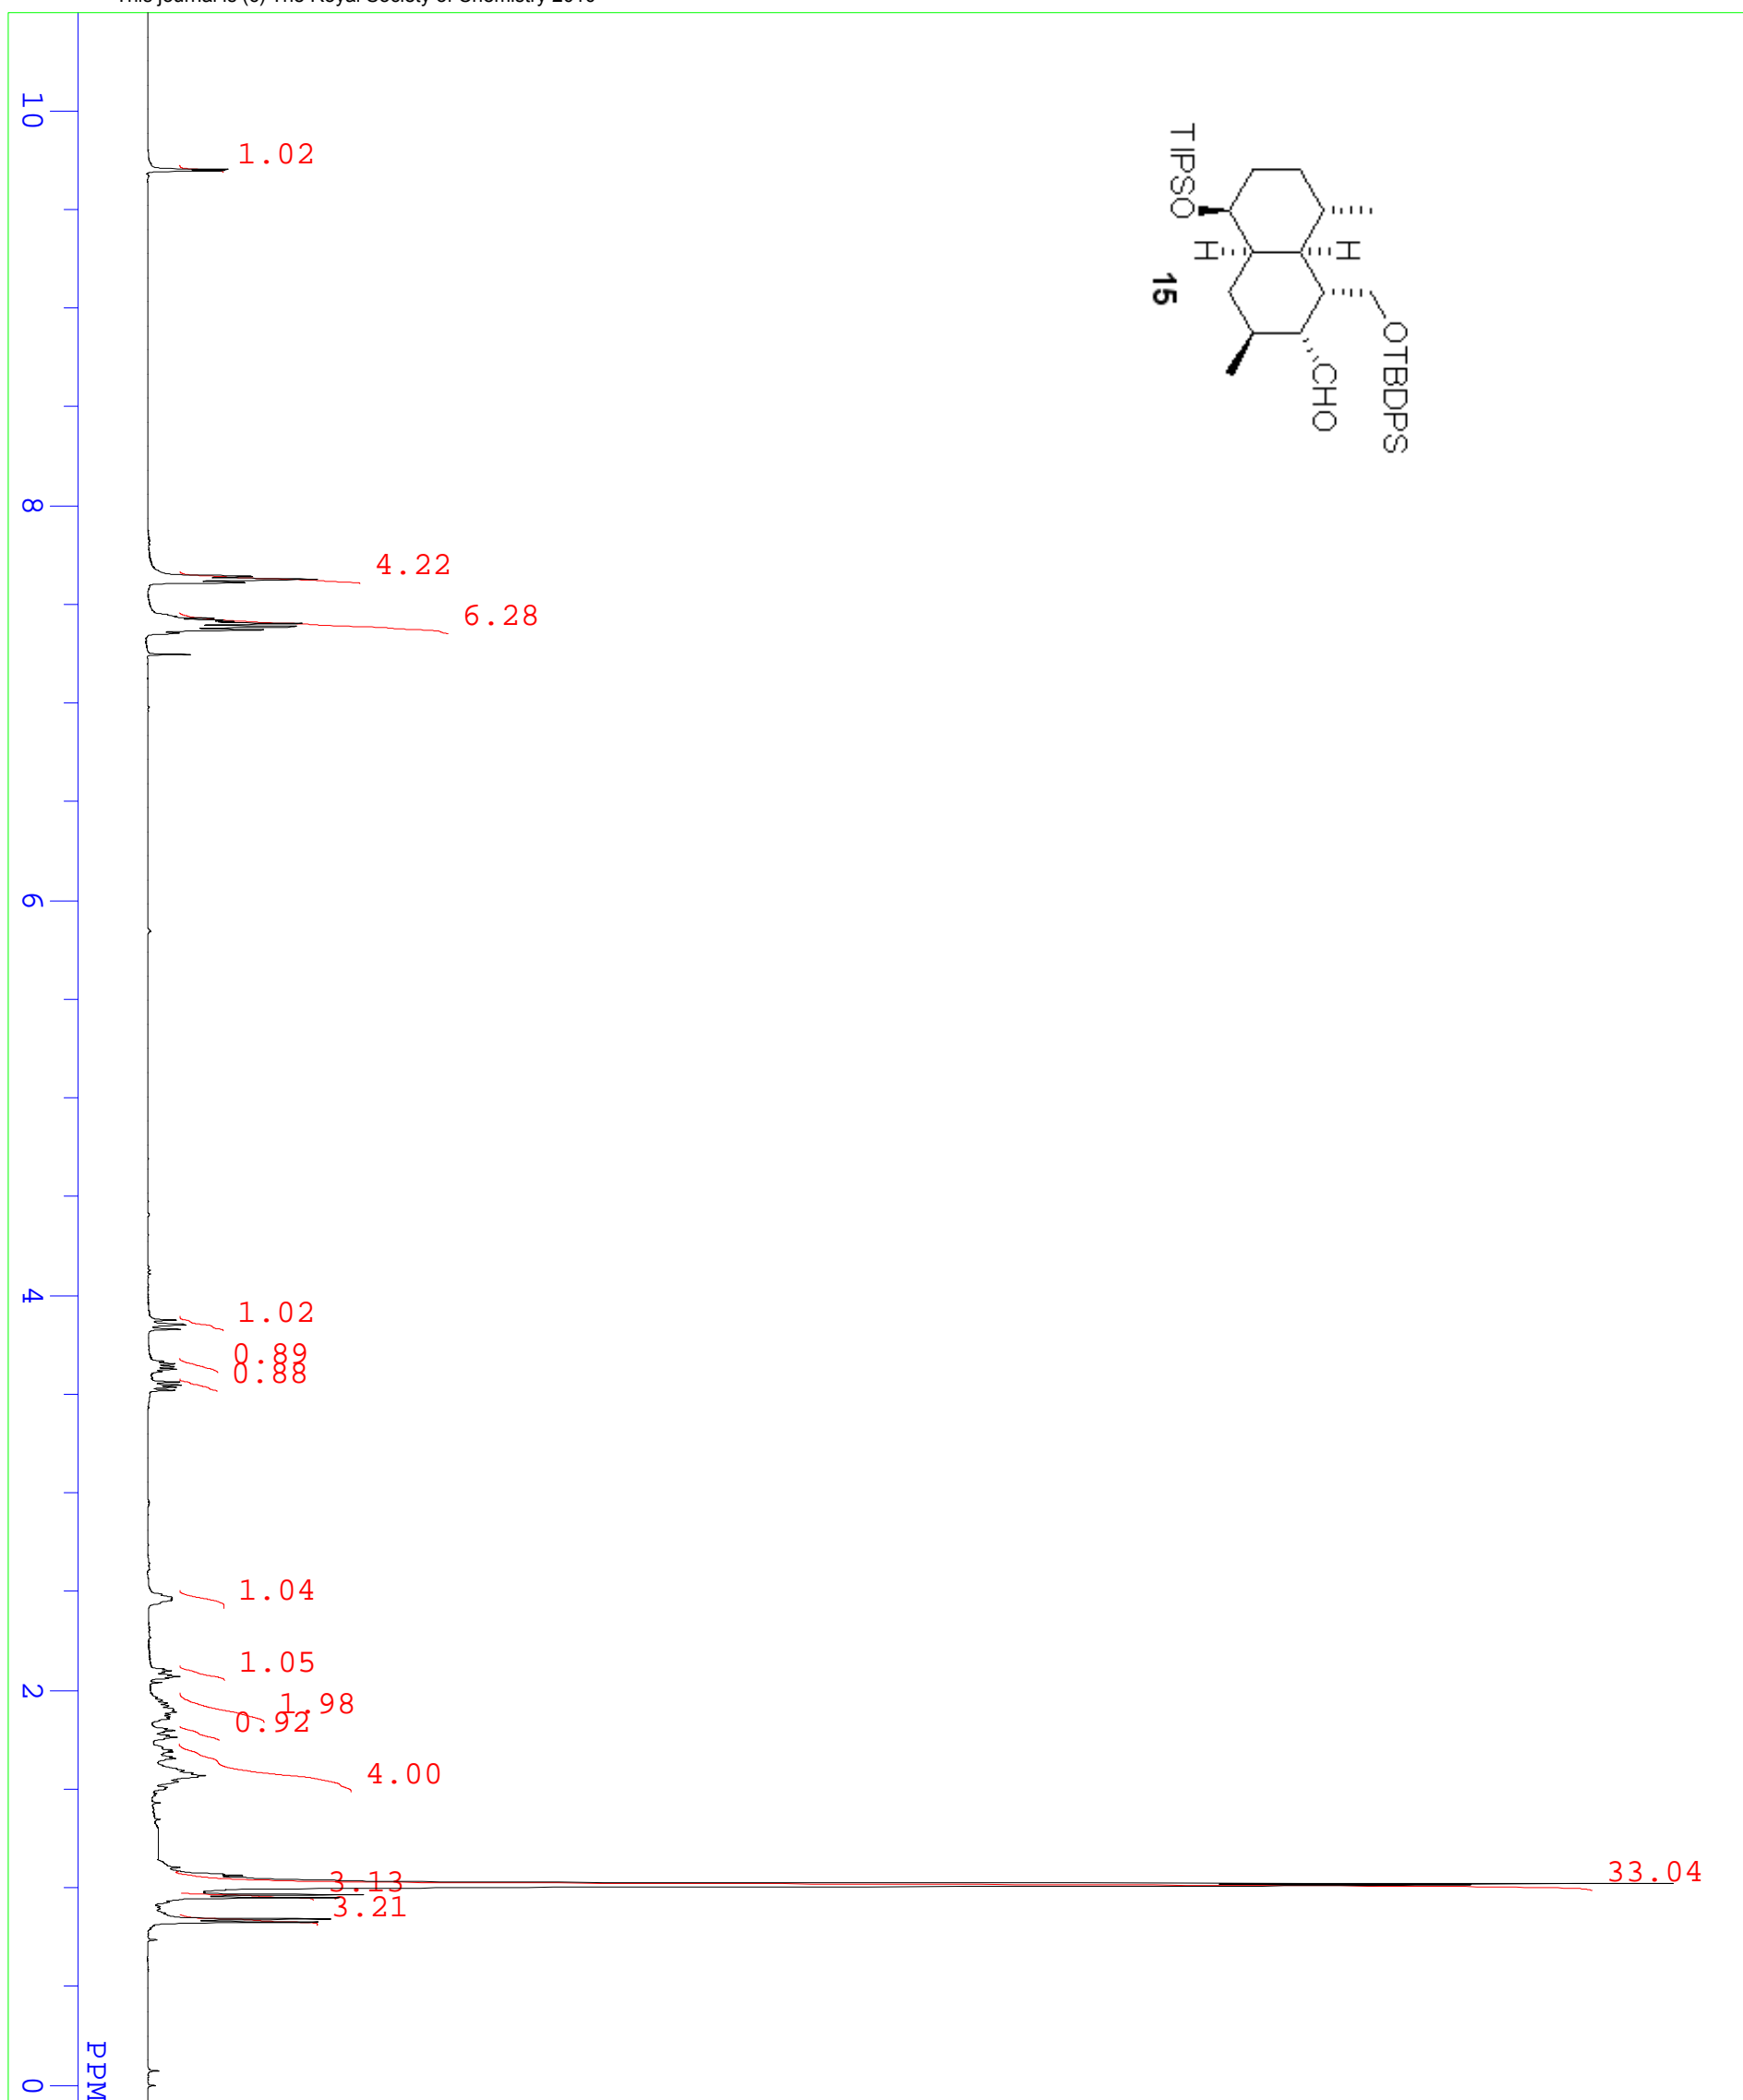

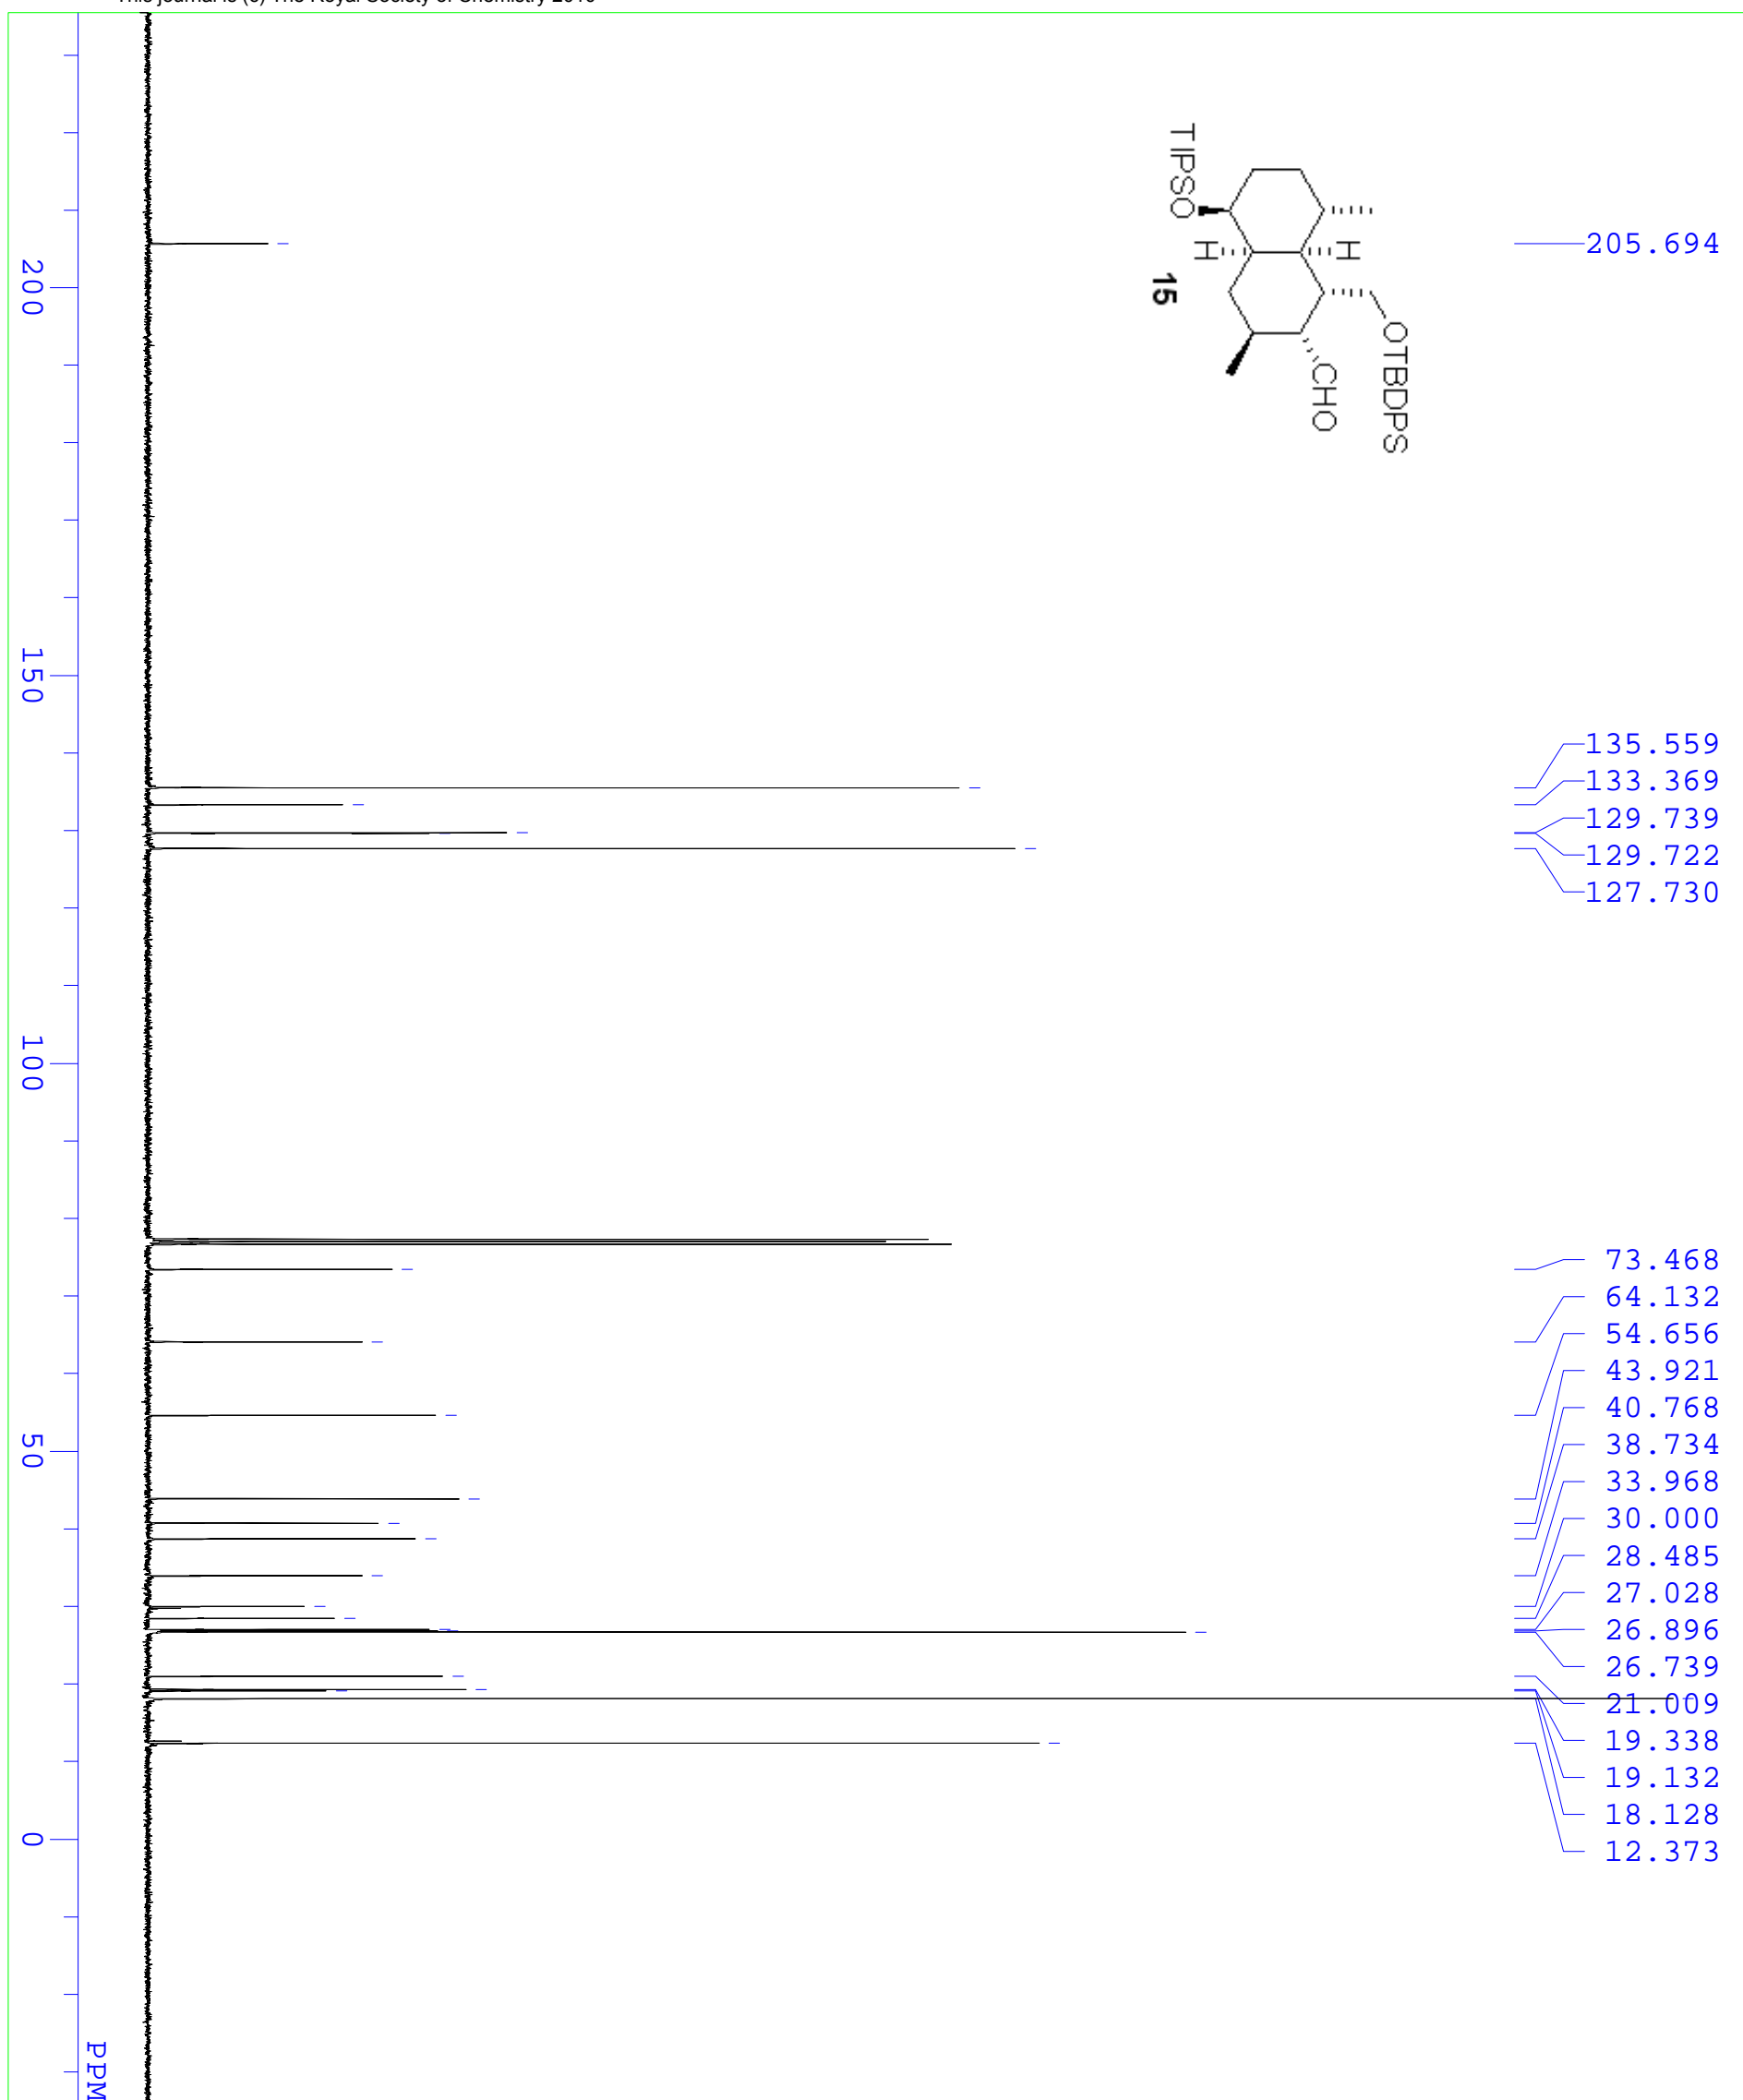

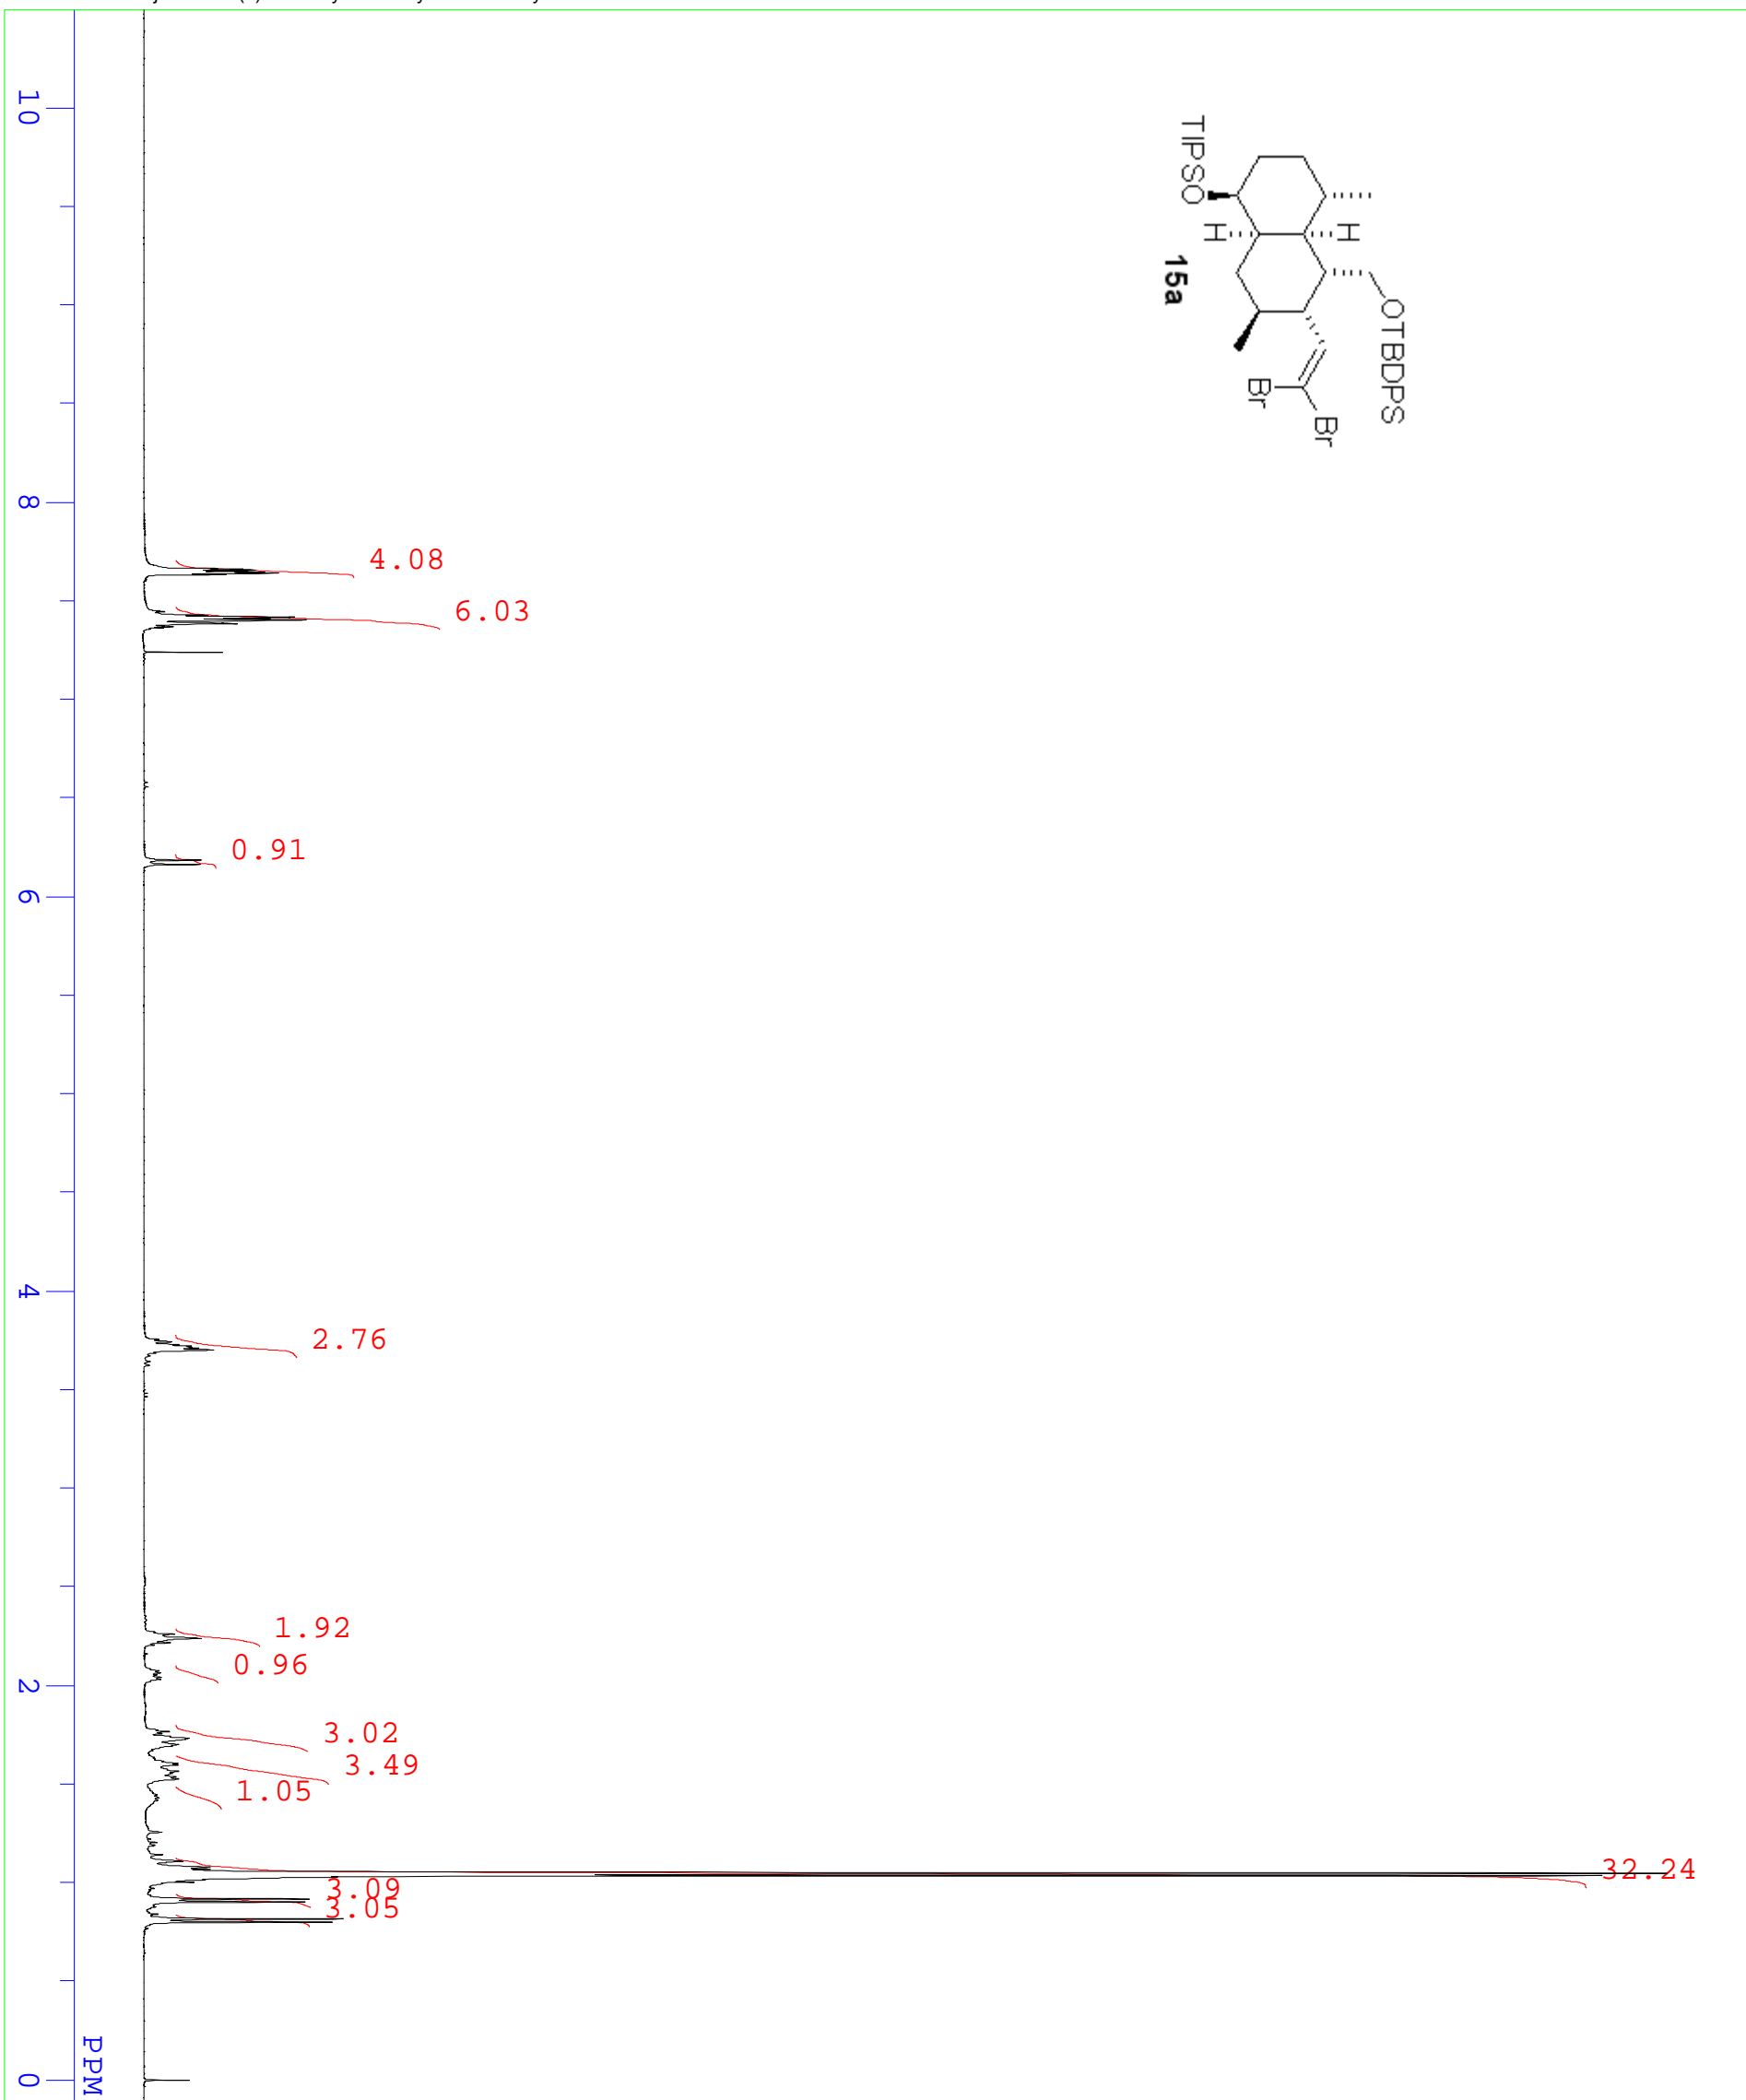

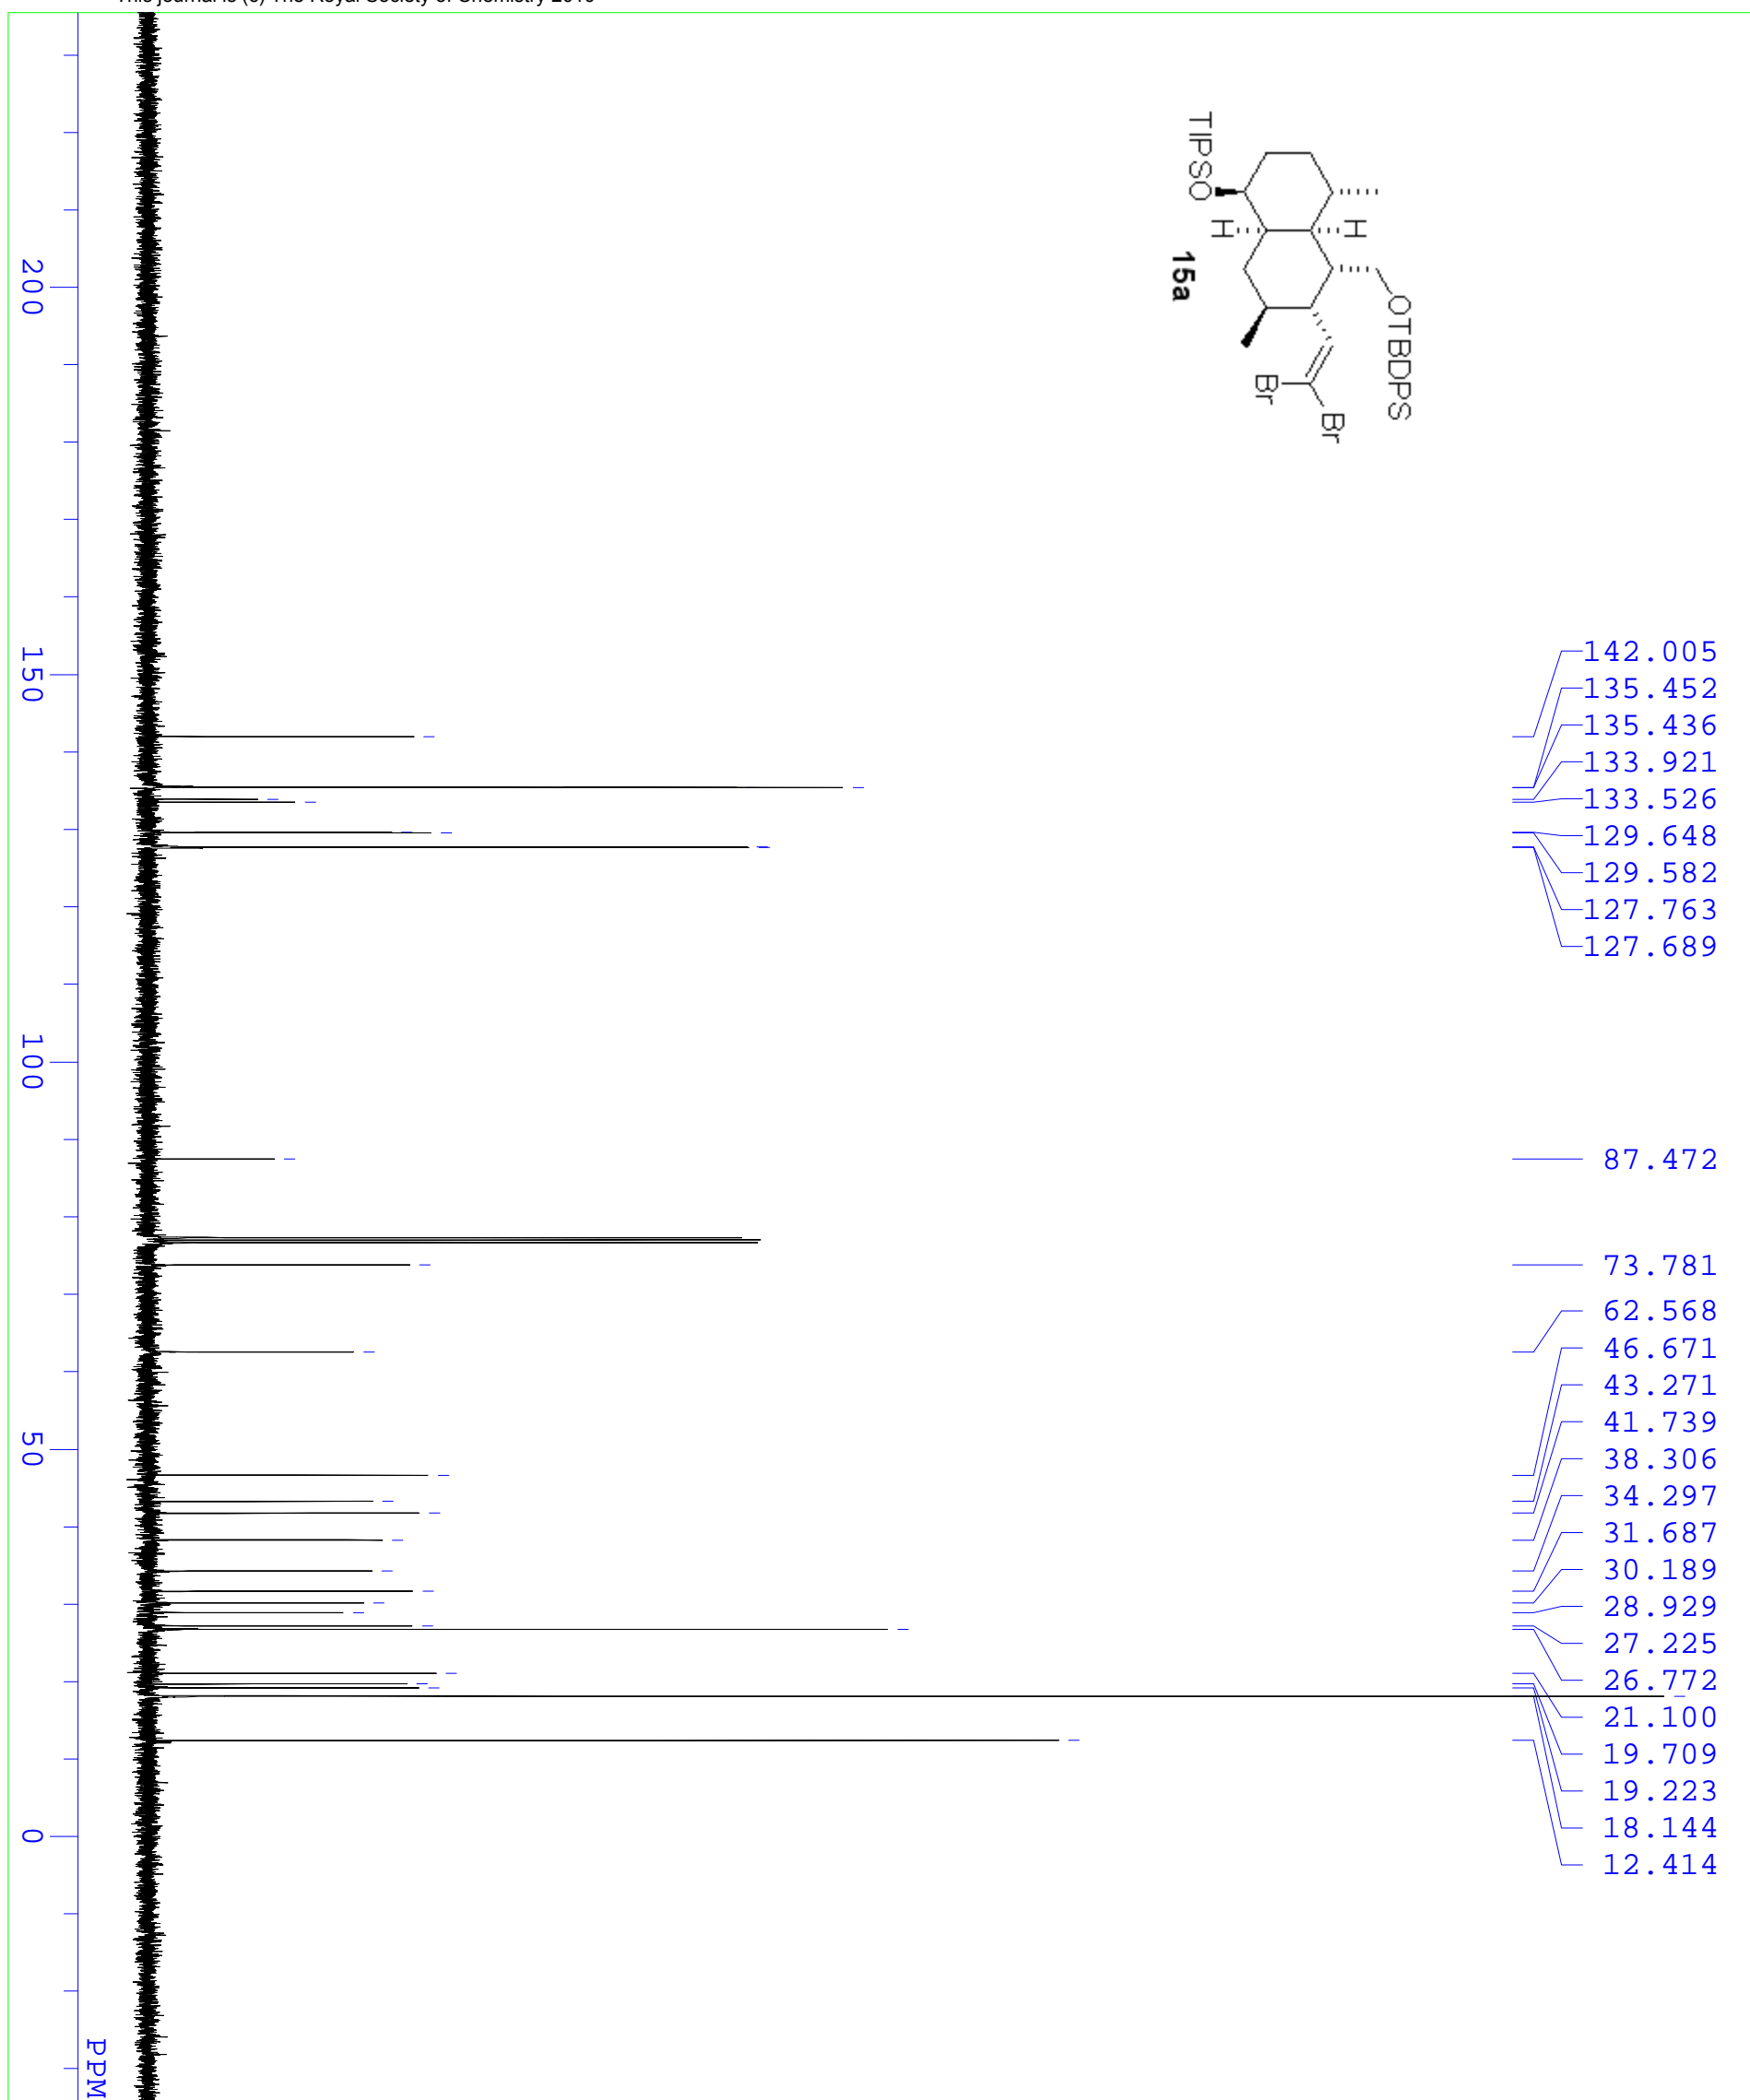

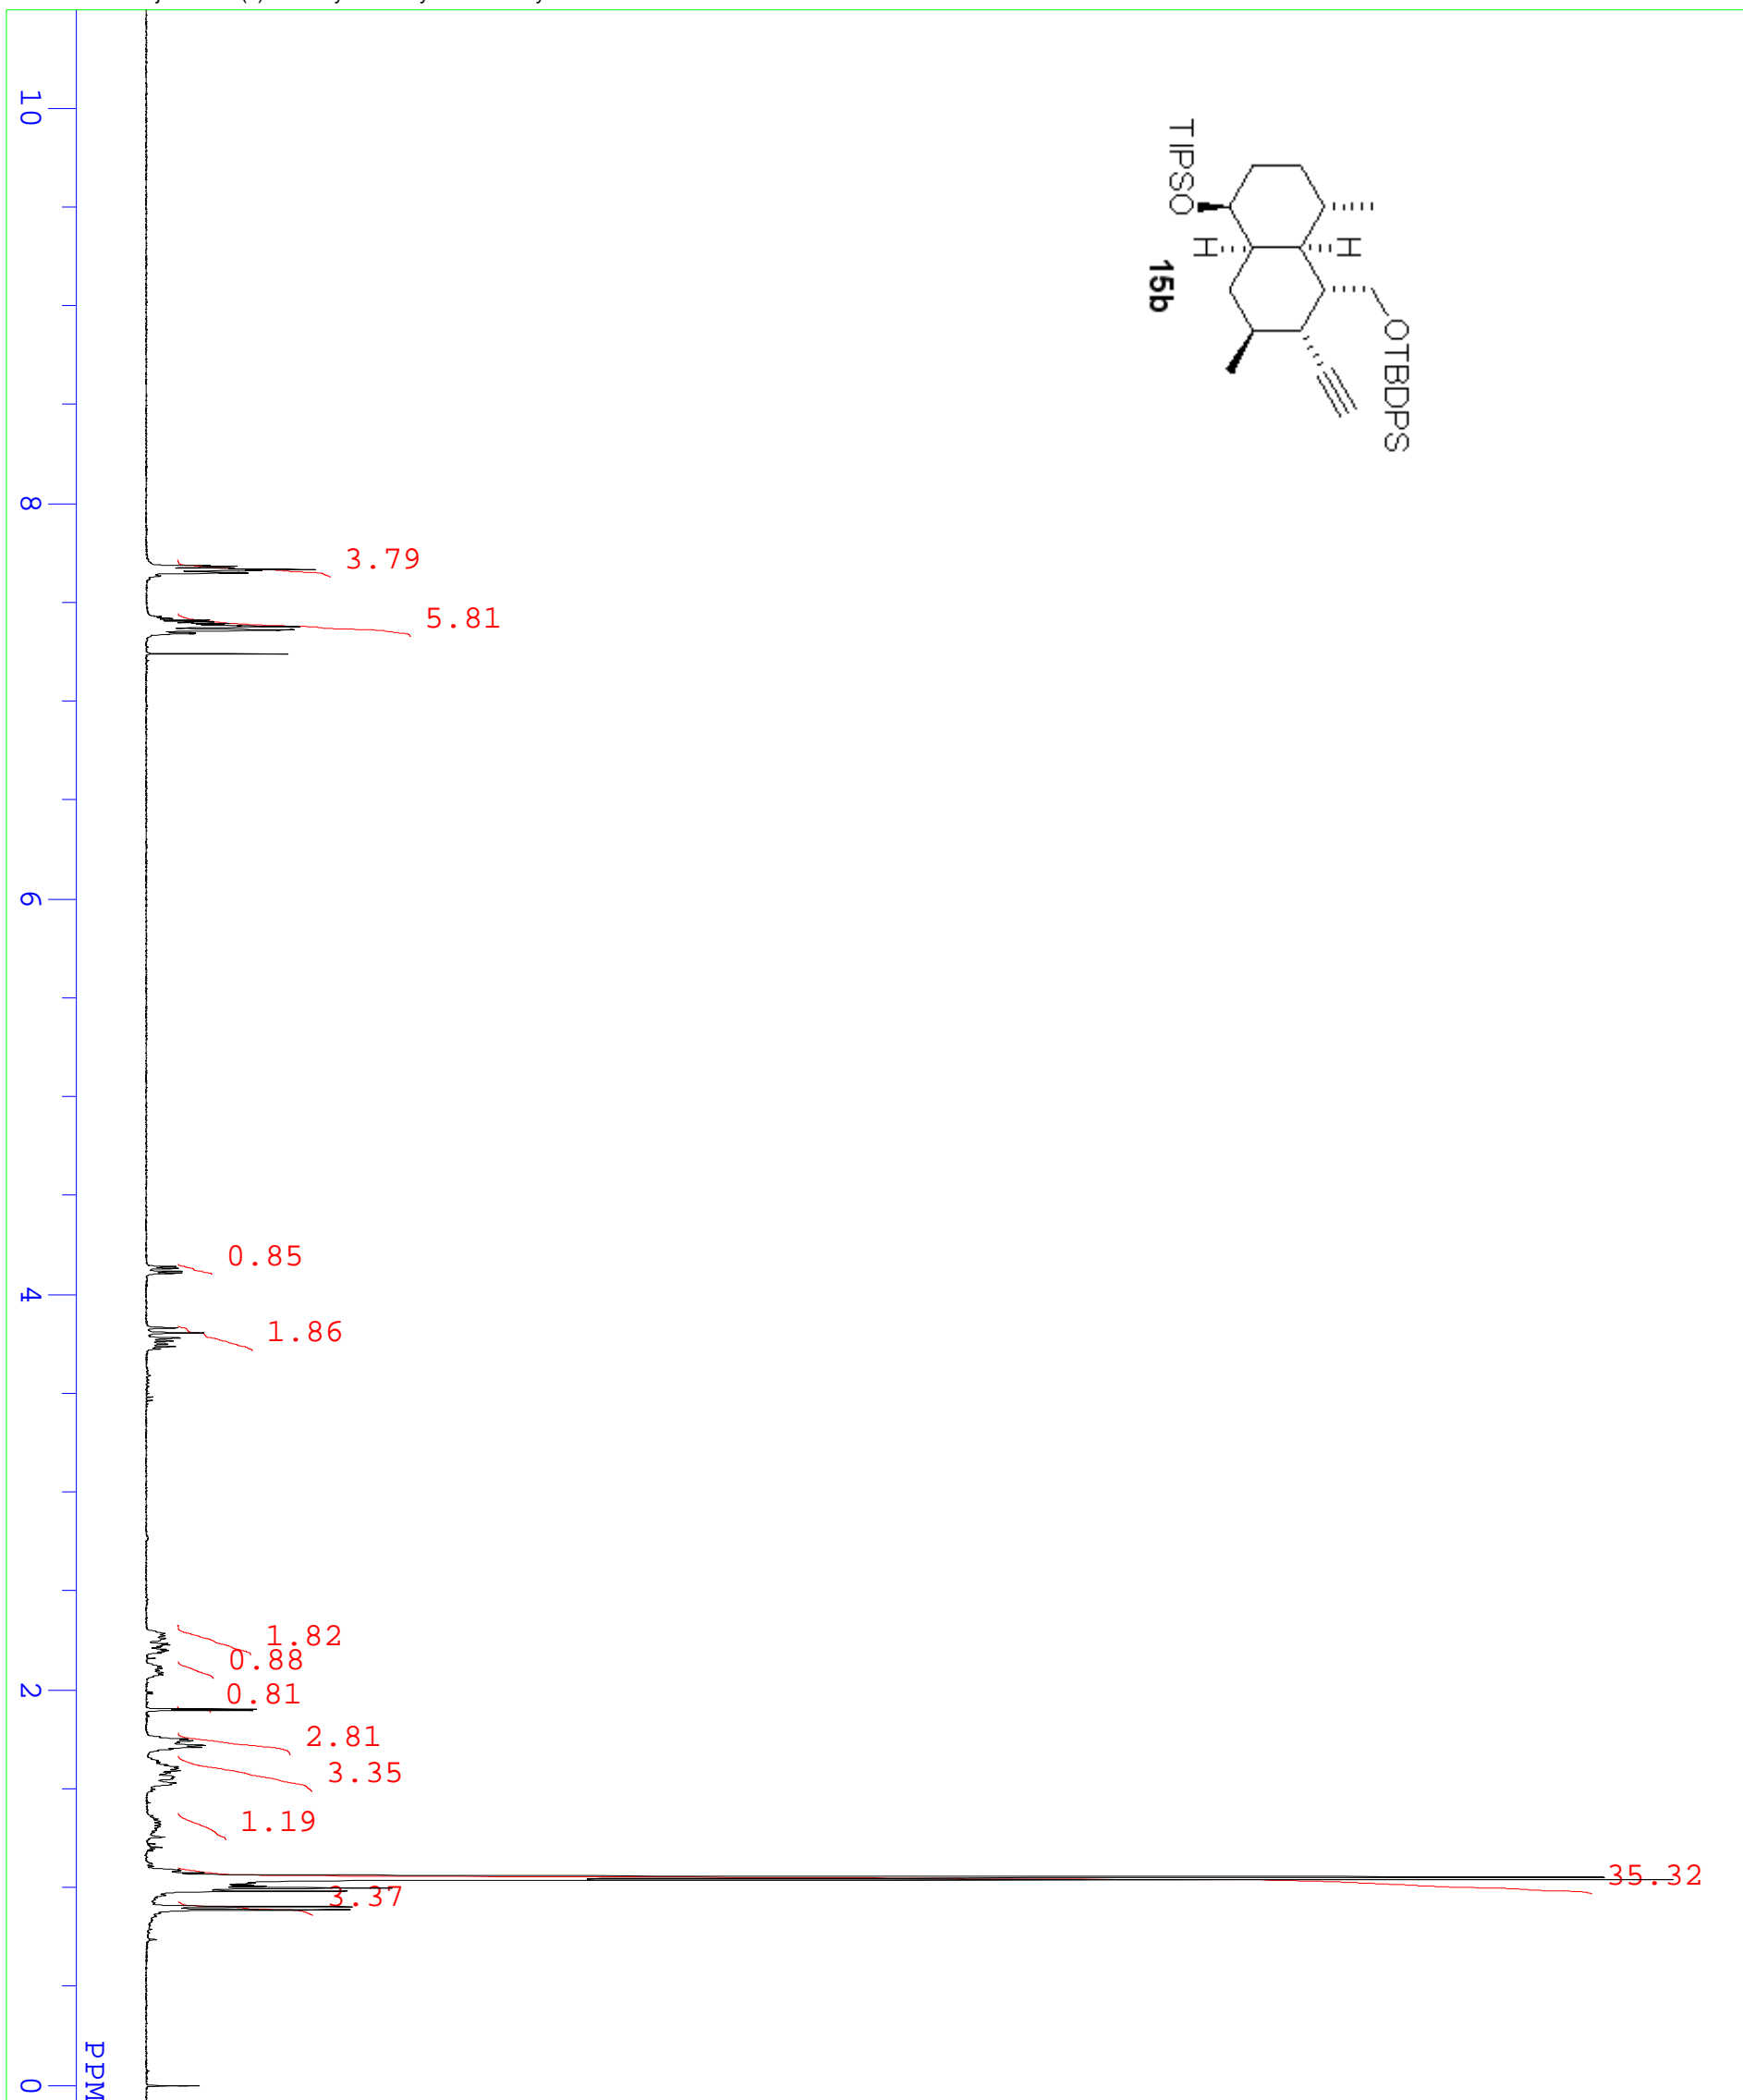

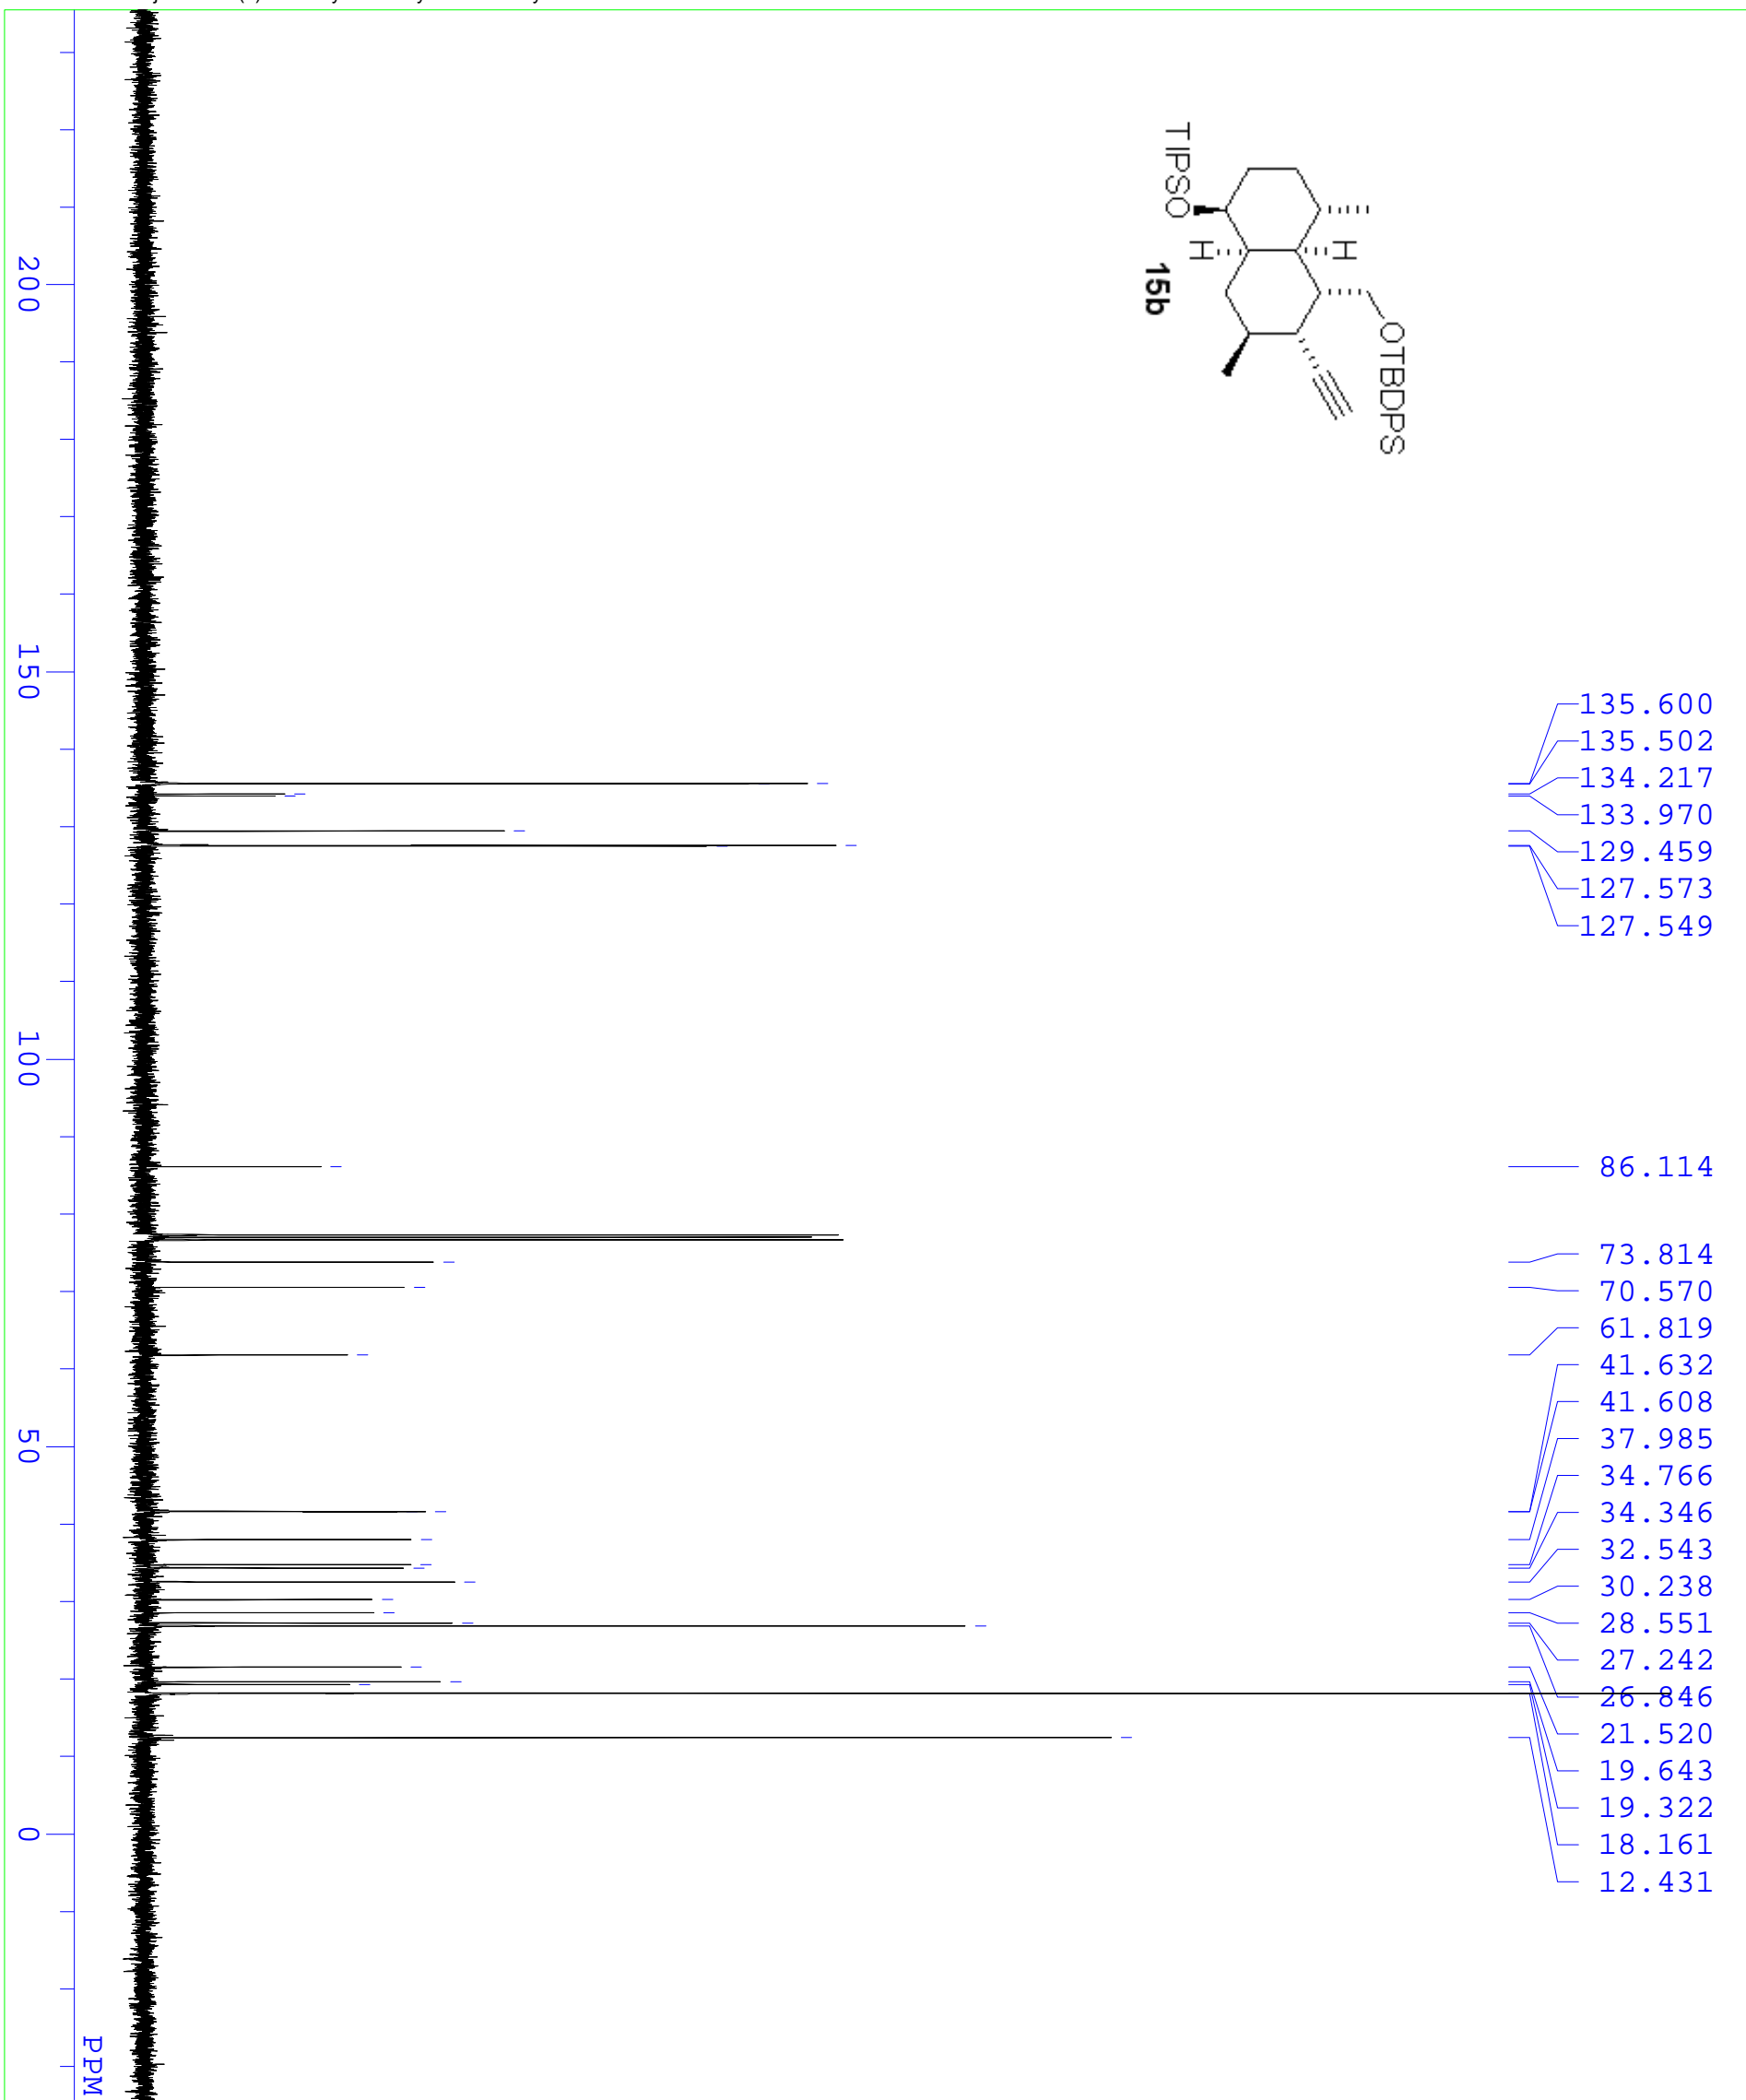

- 135.600
- 135.502
- 134.217
- 133.970
- 129.459
- 127.573
- 127.549
- 86.114
- 73.814
- 70.570
- 61.819
- 41.632
- 41.608
- 37.985
- 34.766
- 34.346
- 32.543
- 30.238
- 28.551
- 27.242
- 26.846
- 21.520
- 19.643
- 19.322
- 18.161
- 12.431

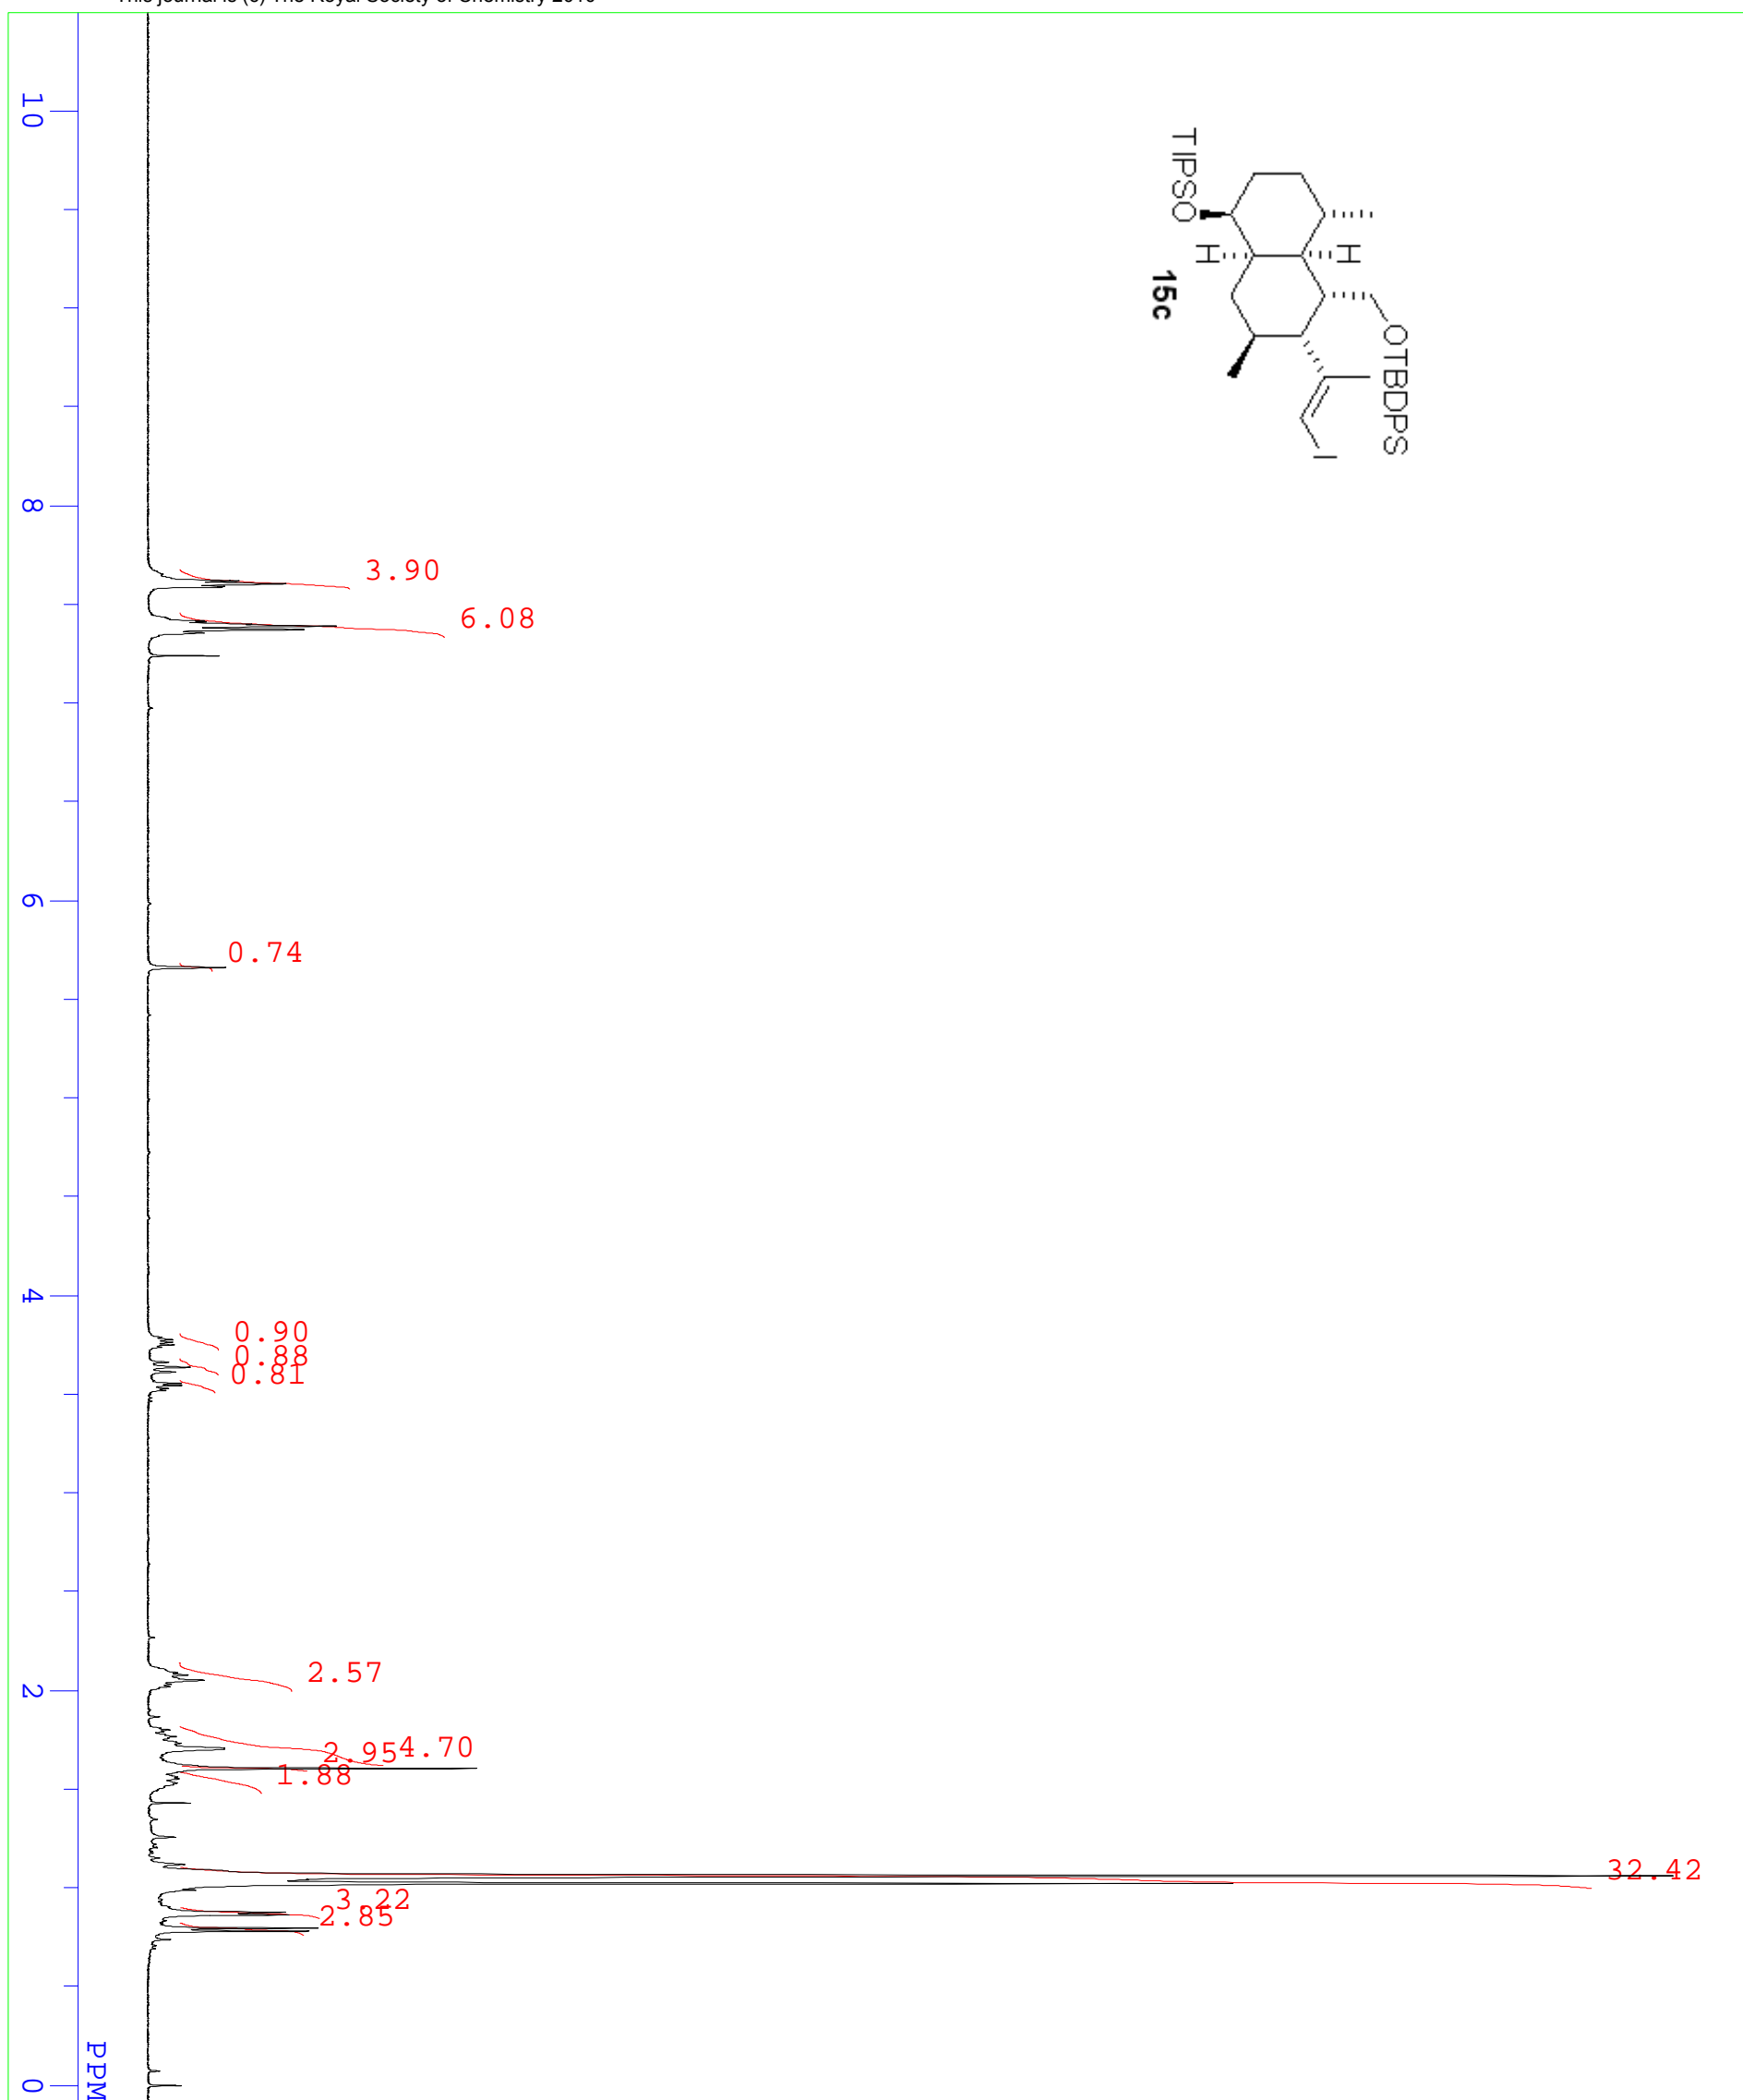



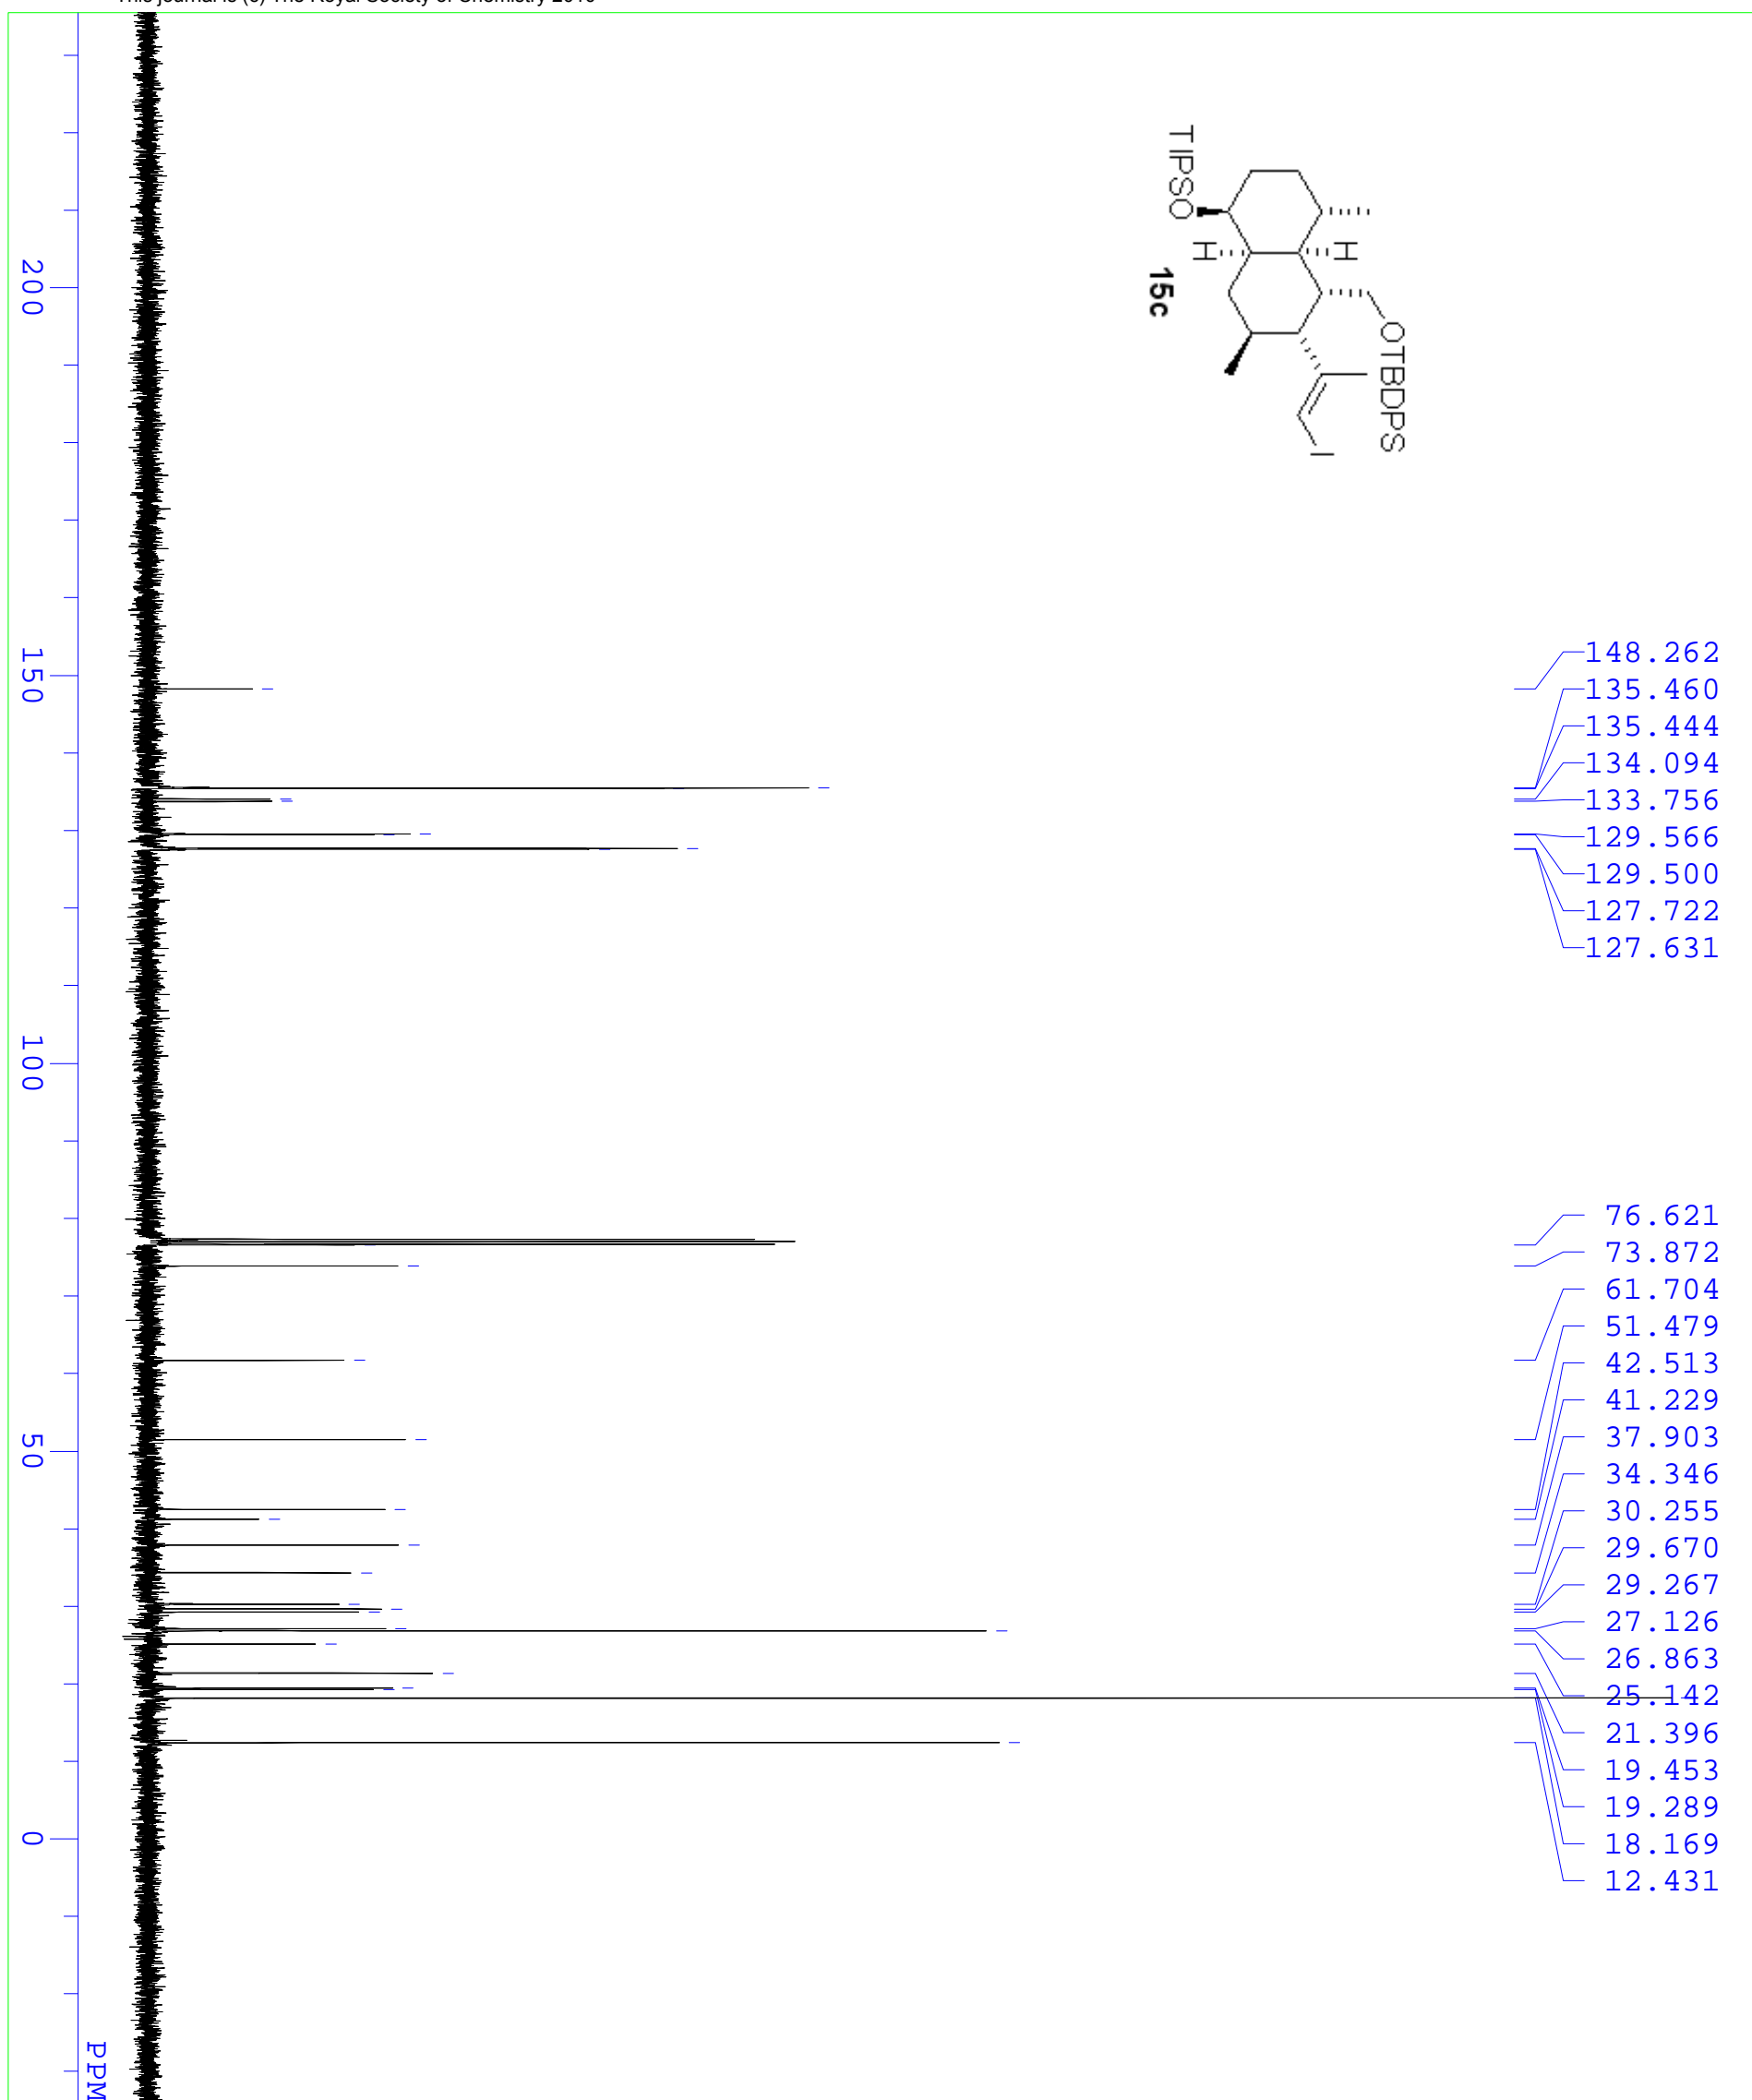

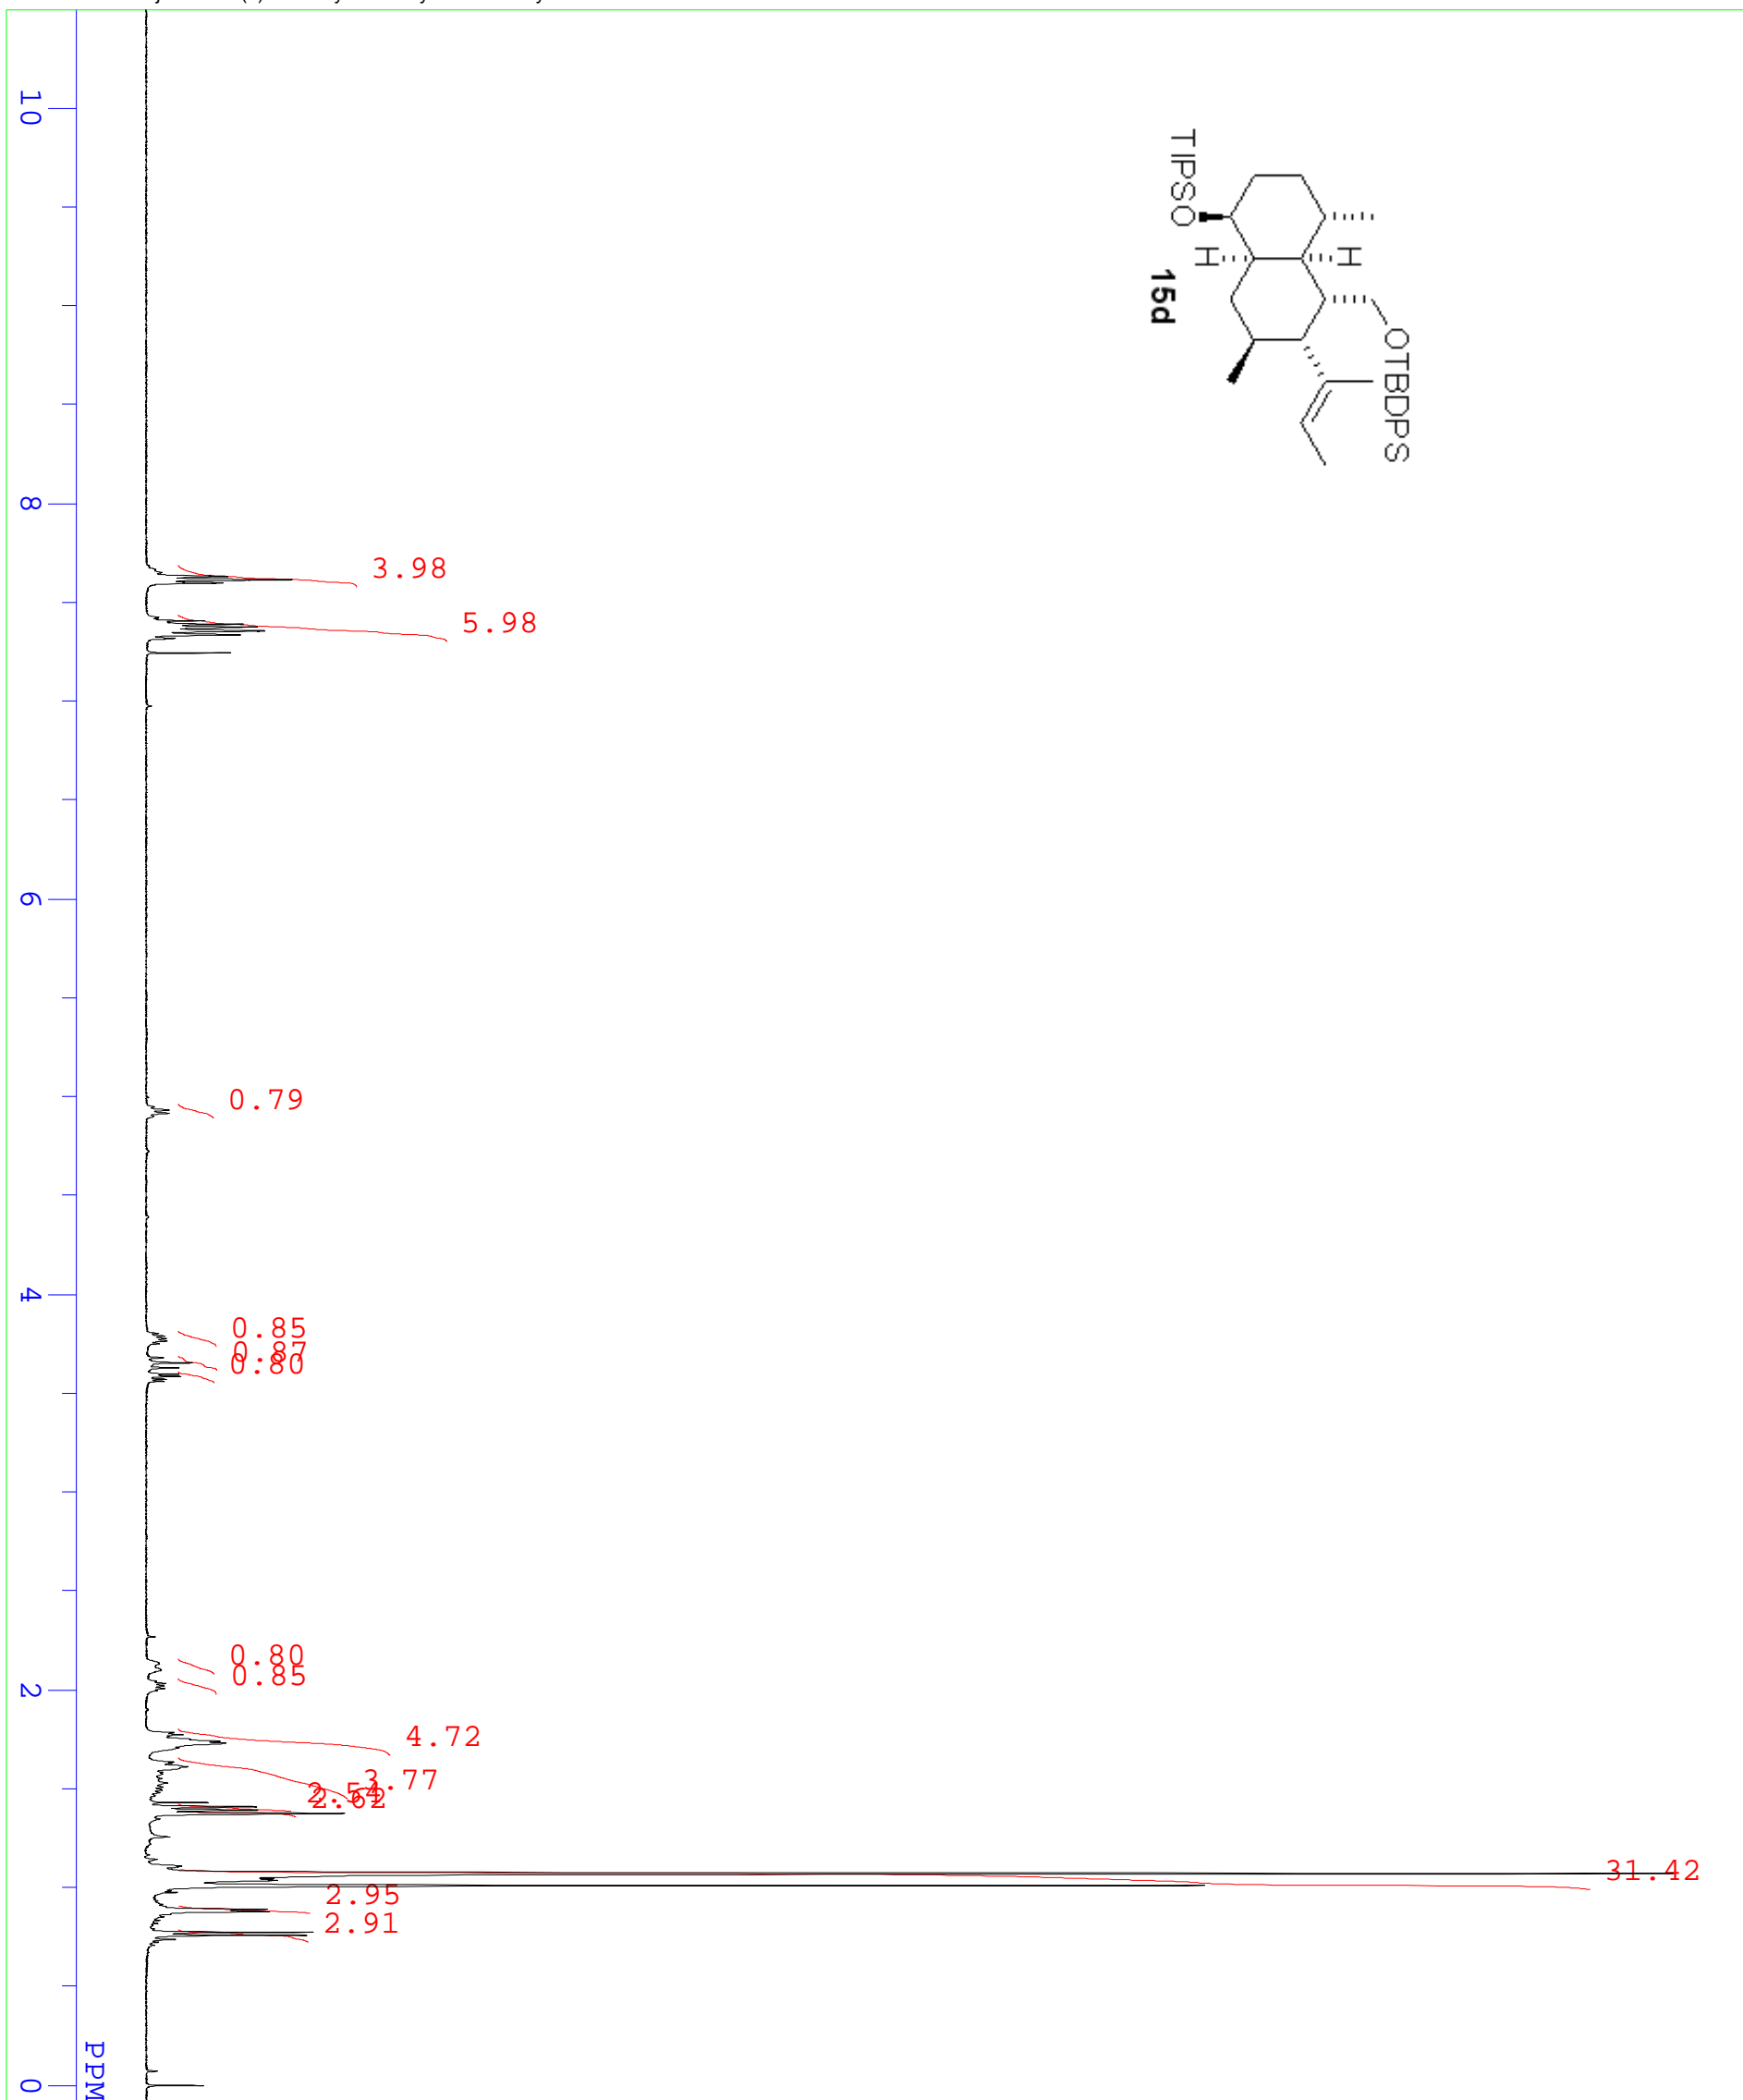

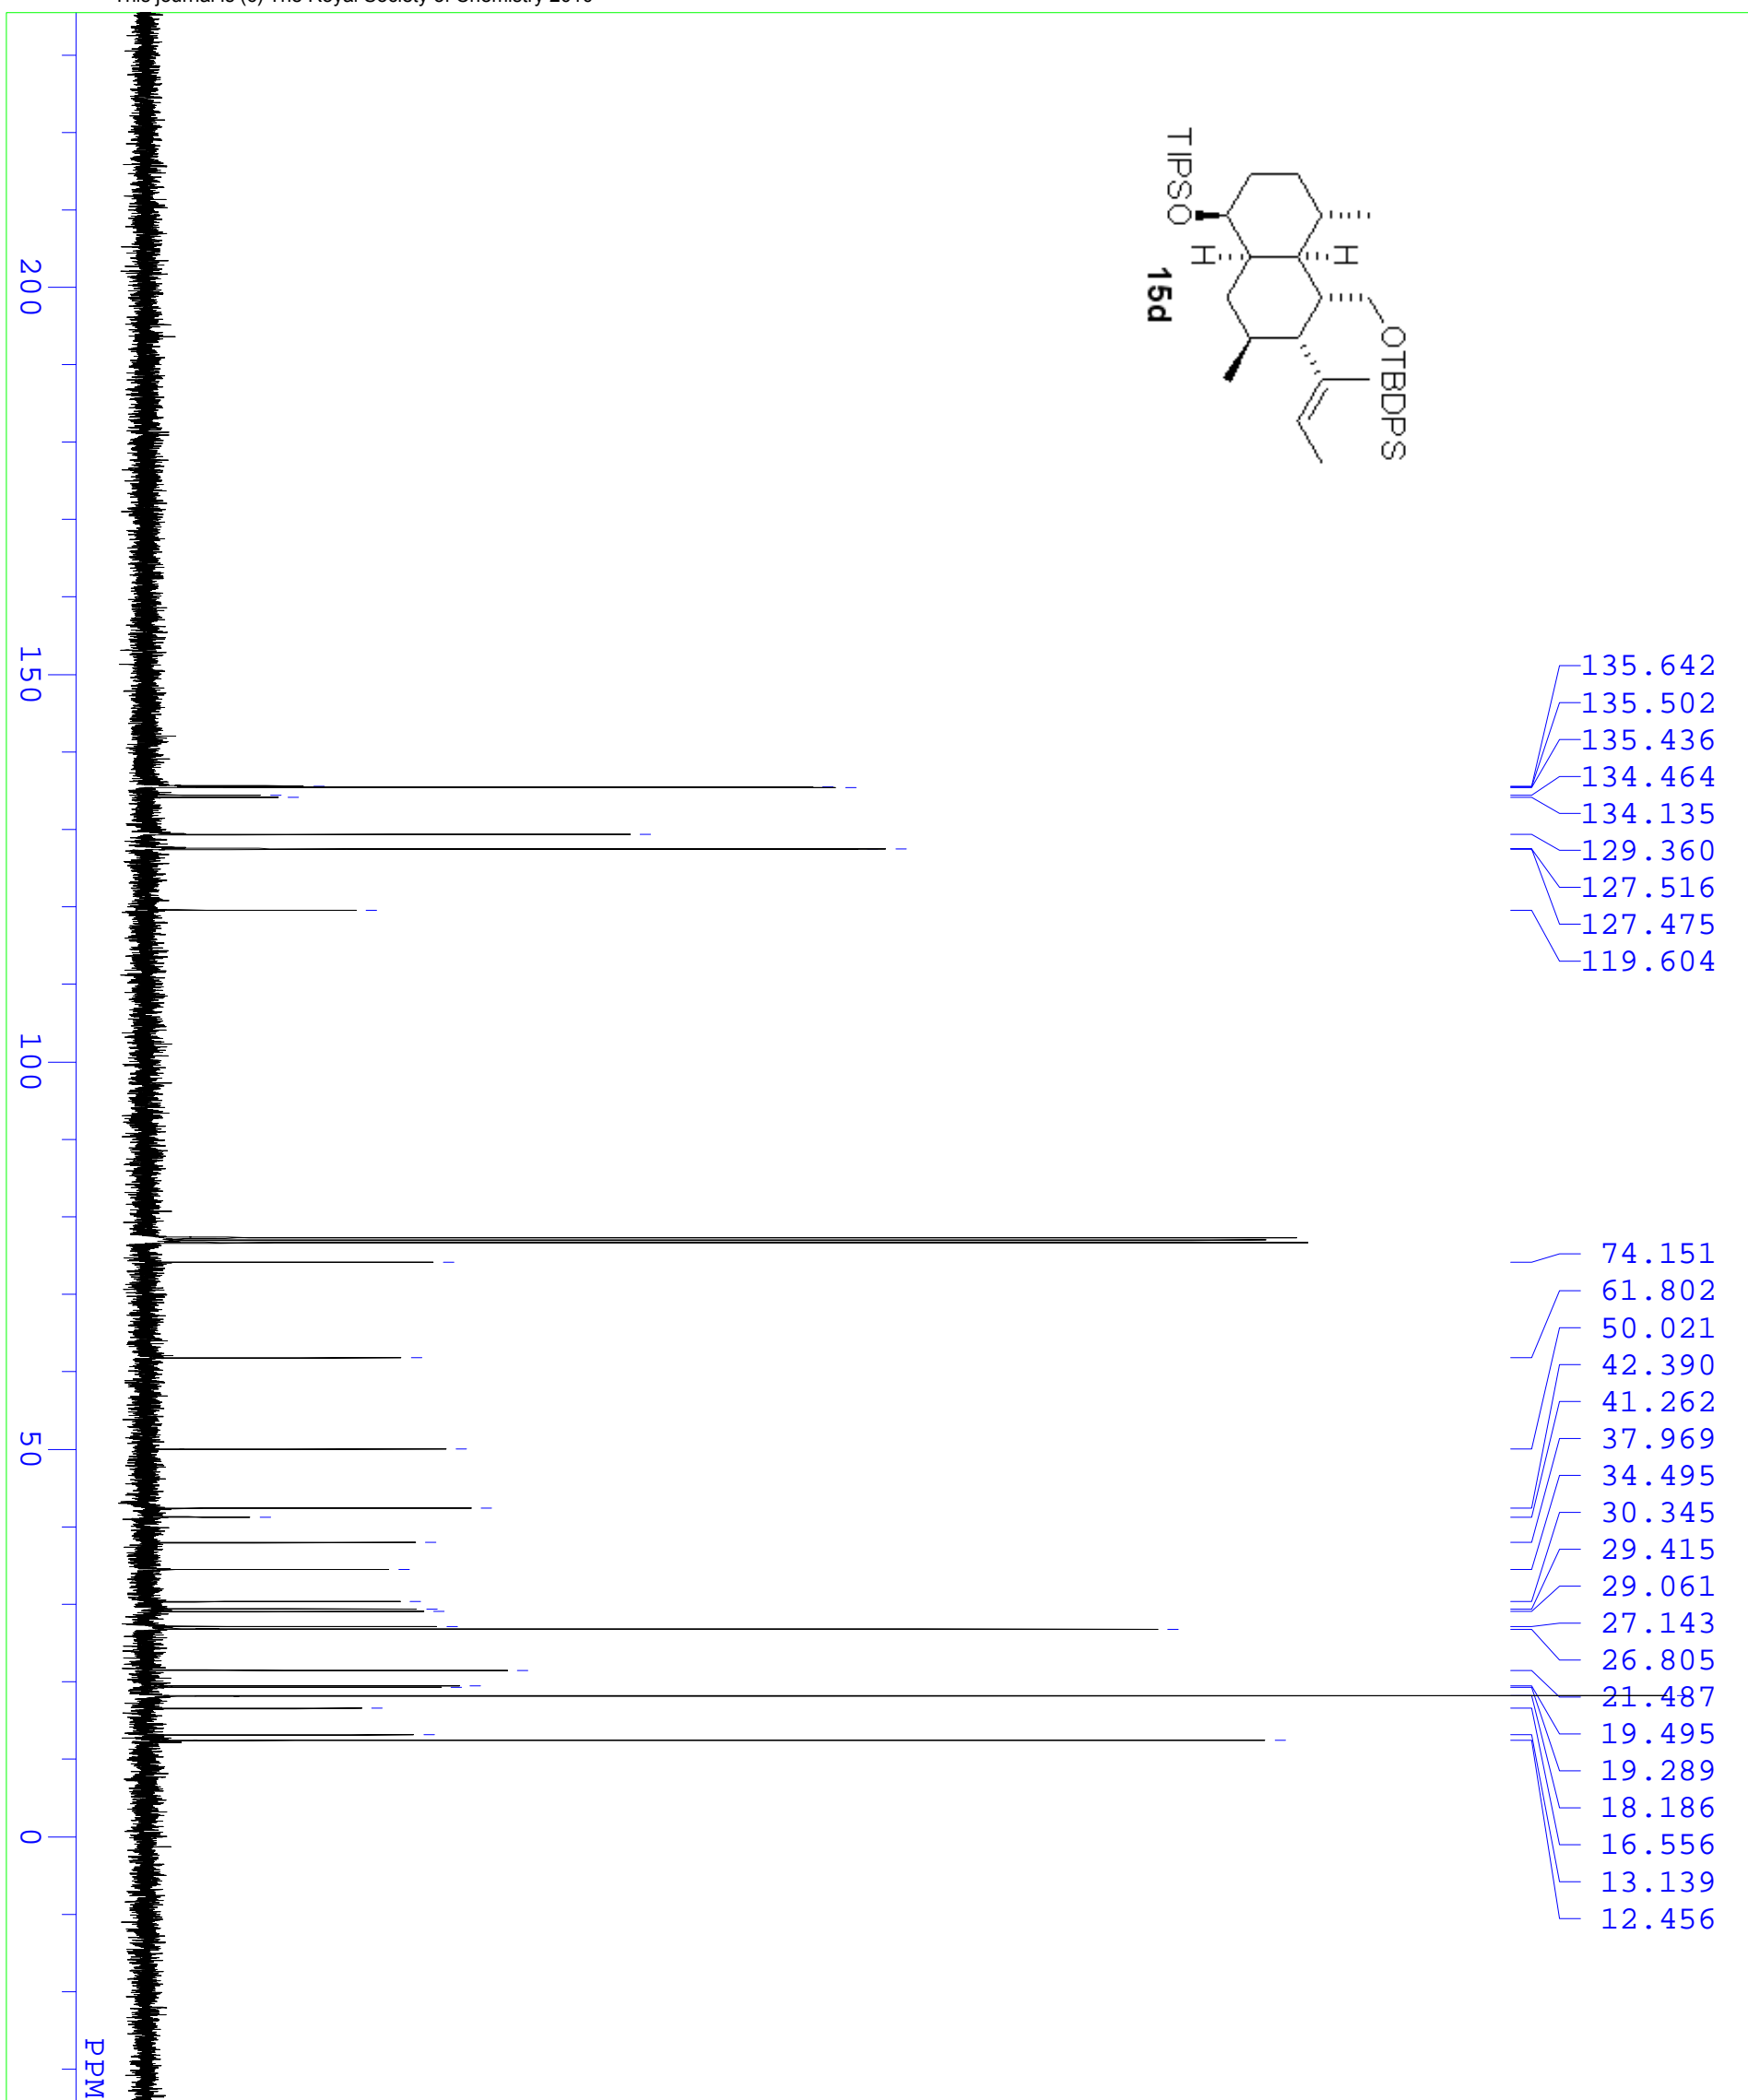

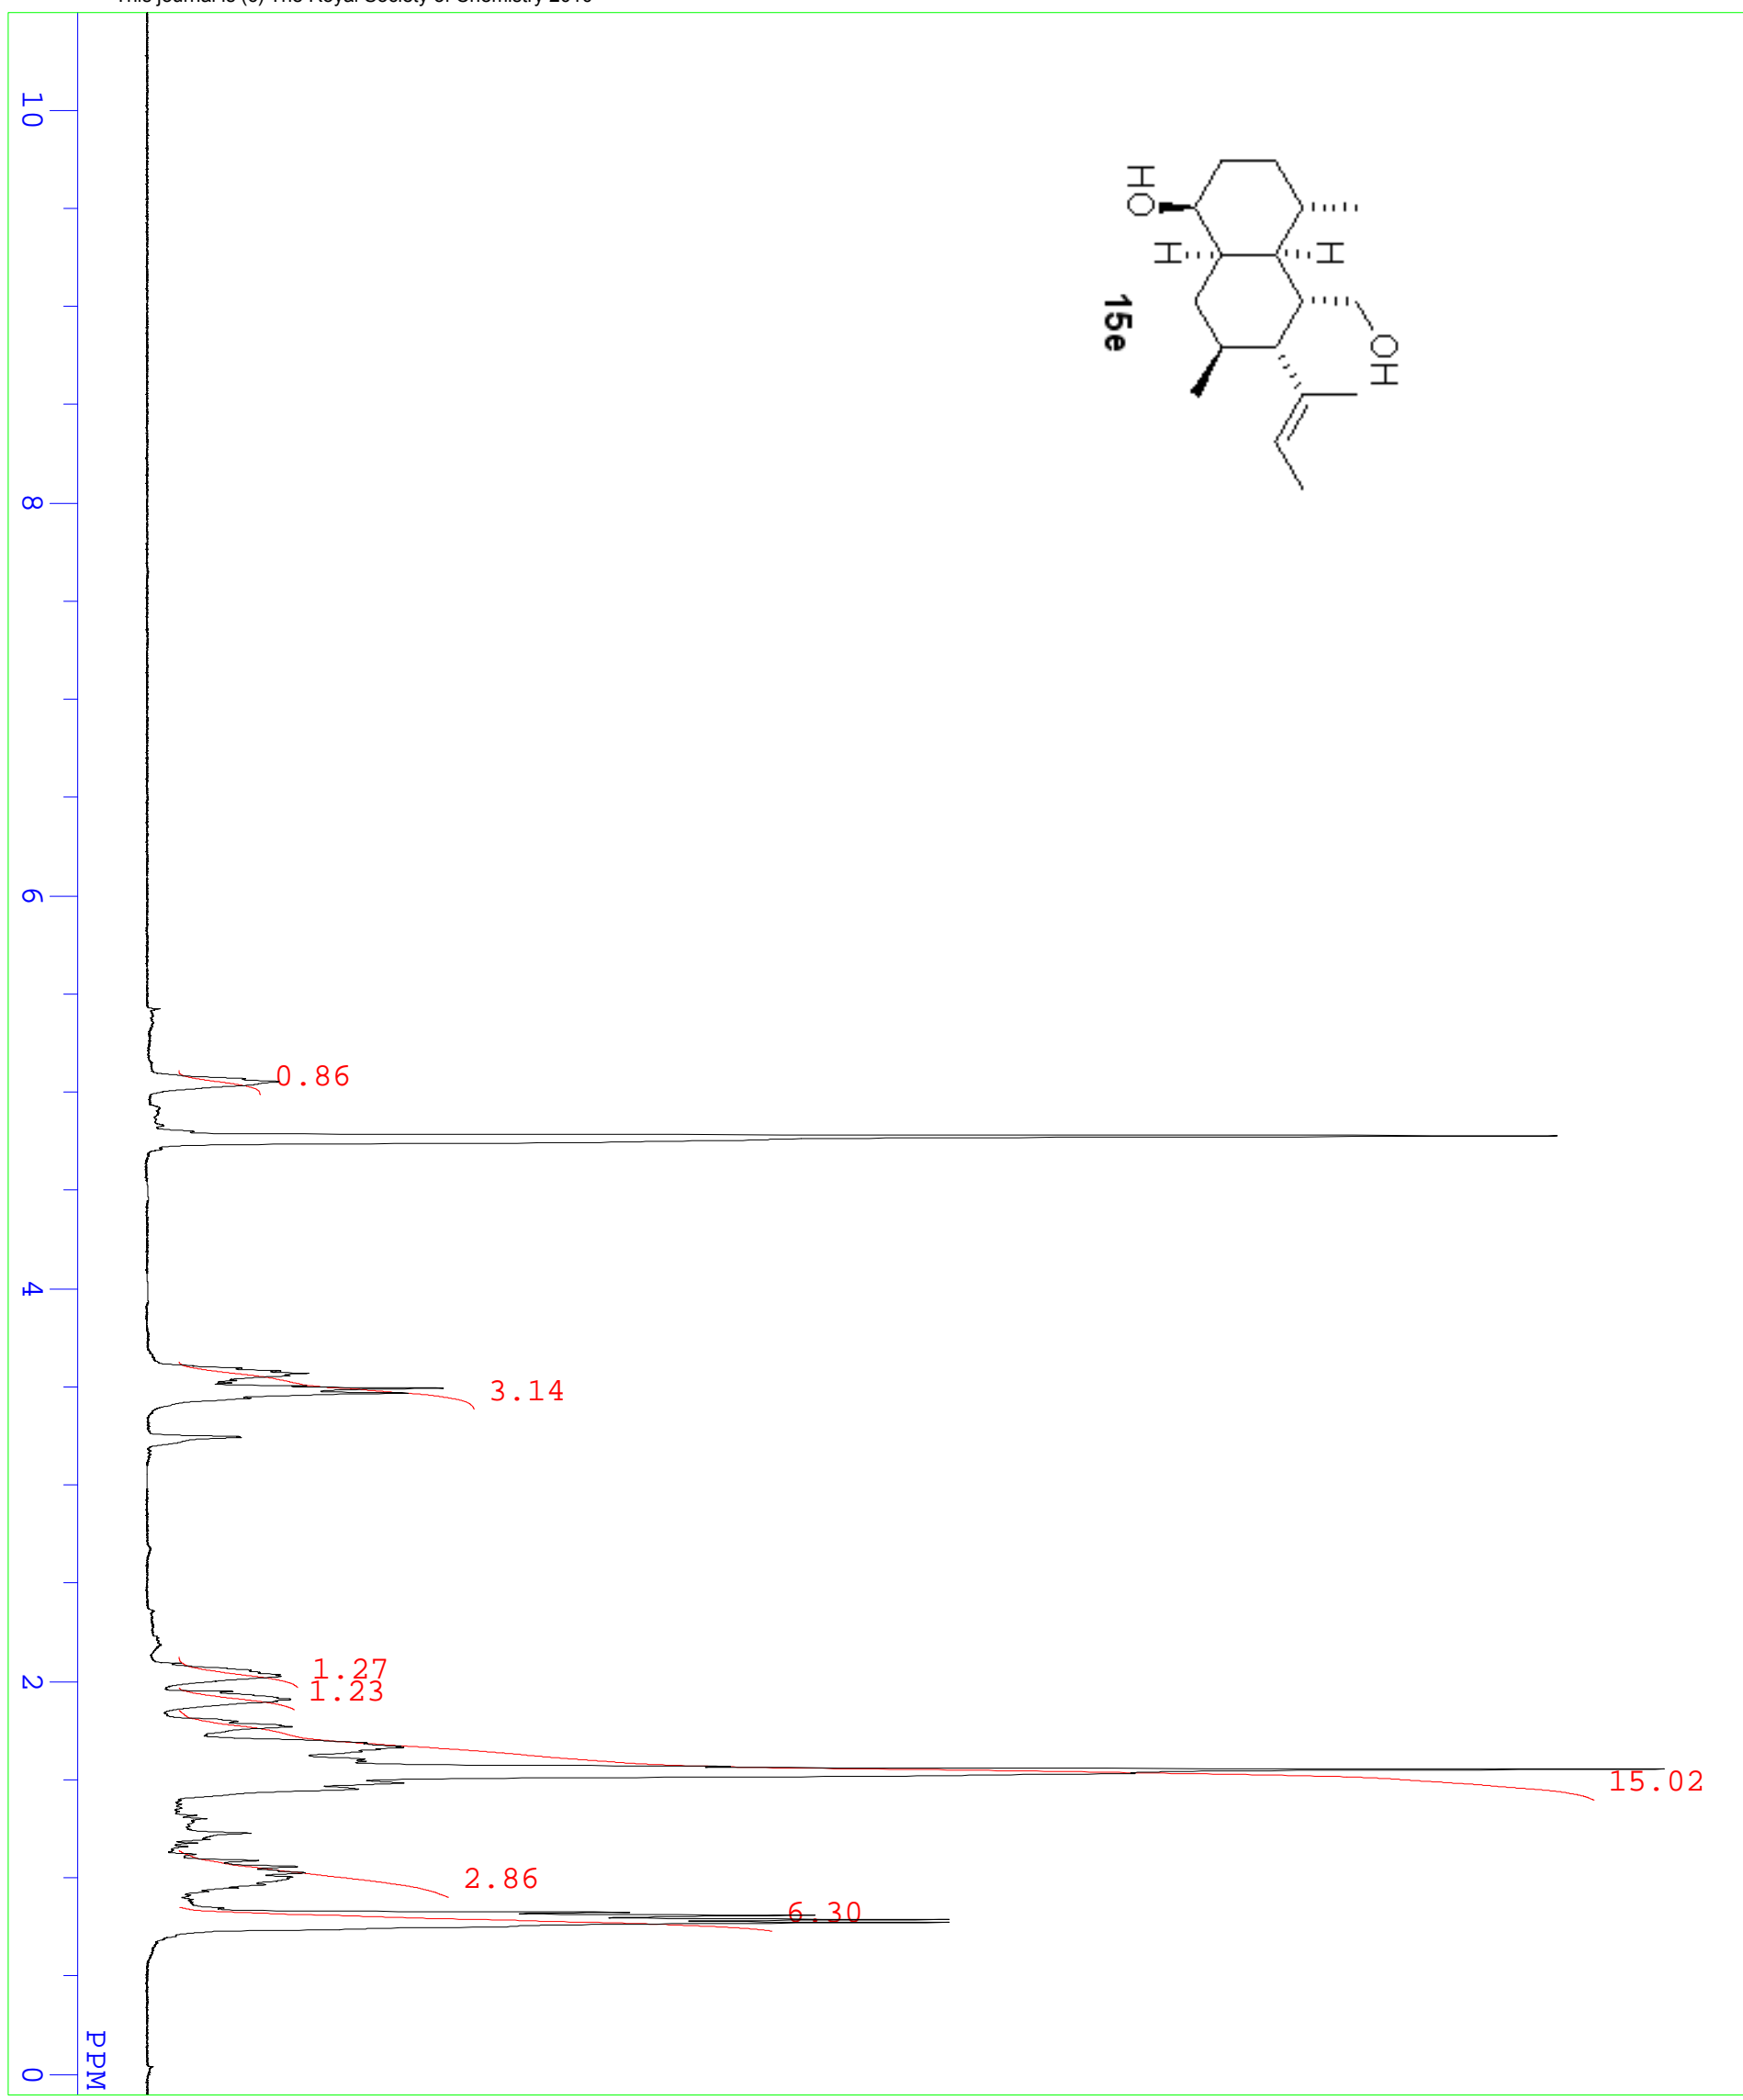

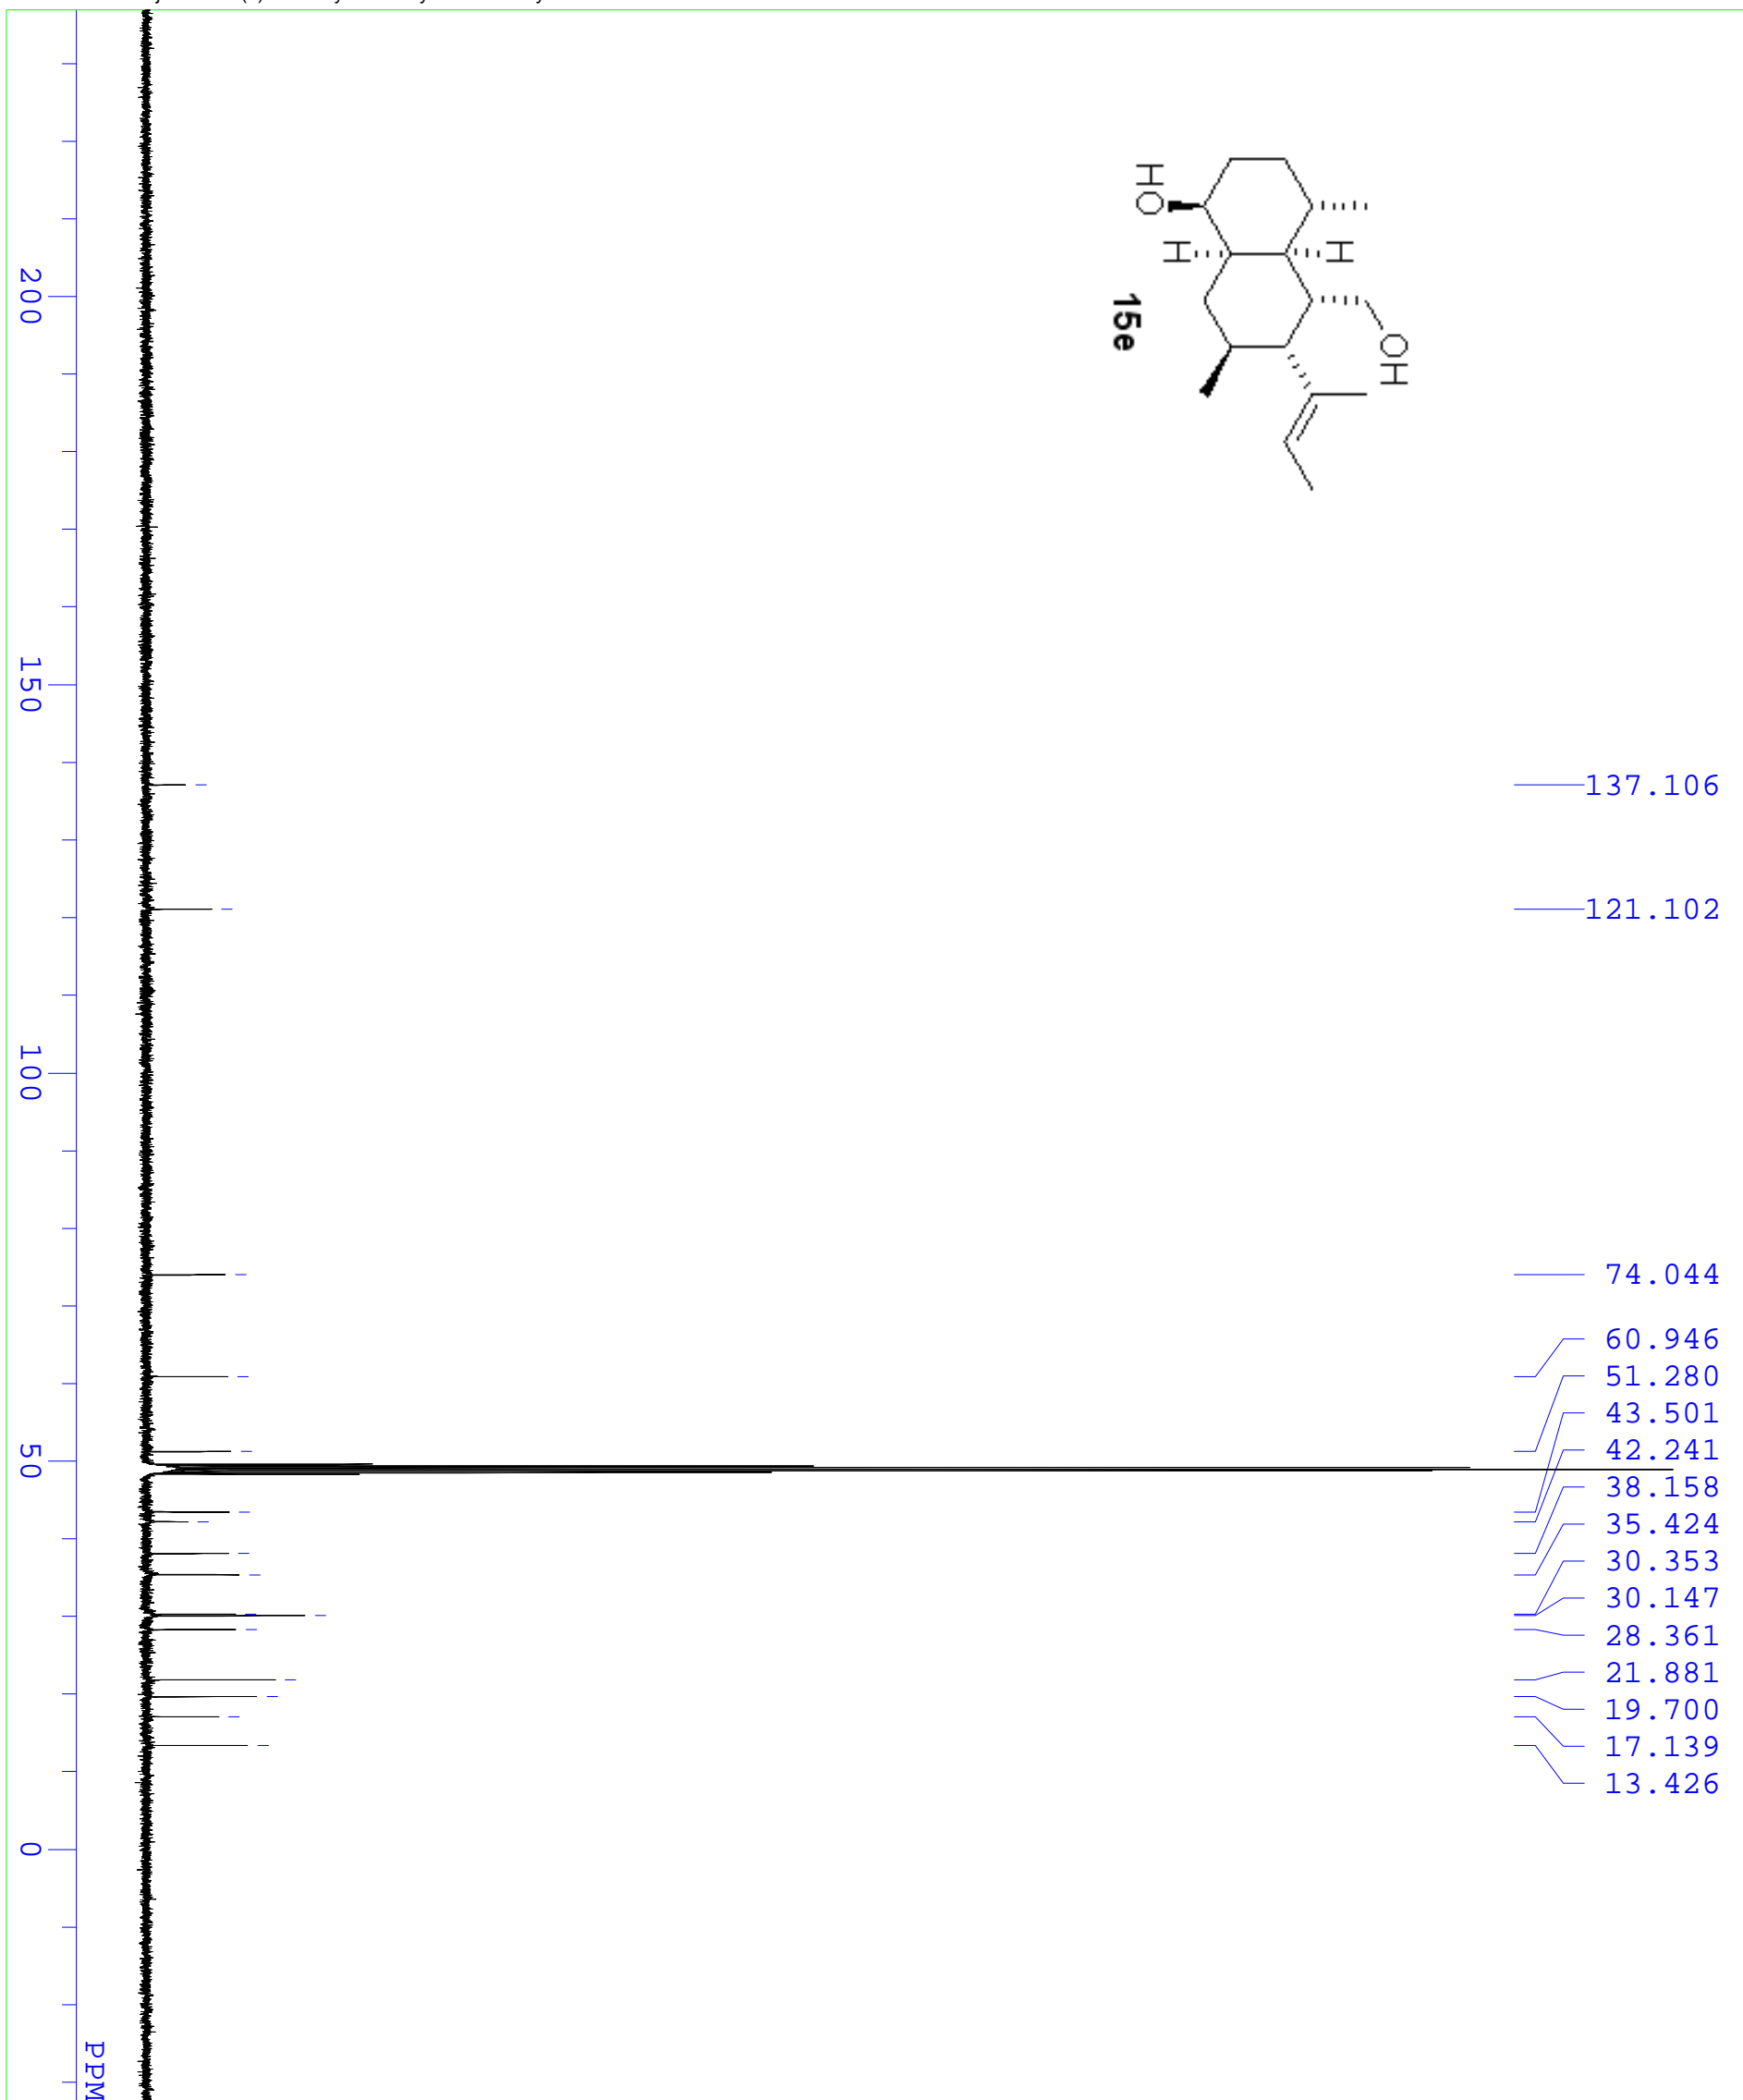

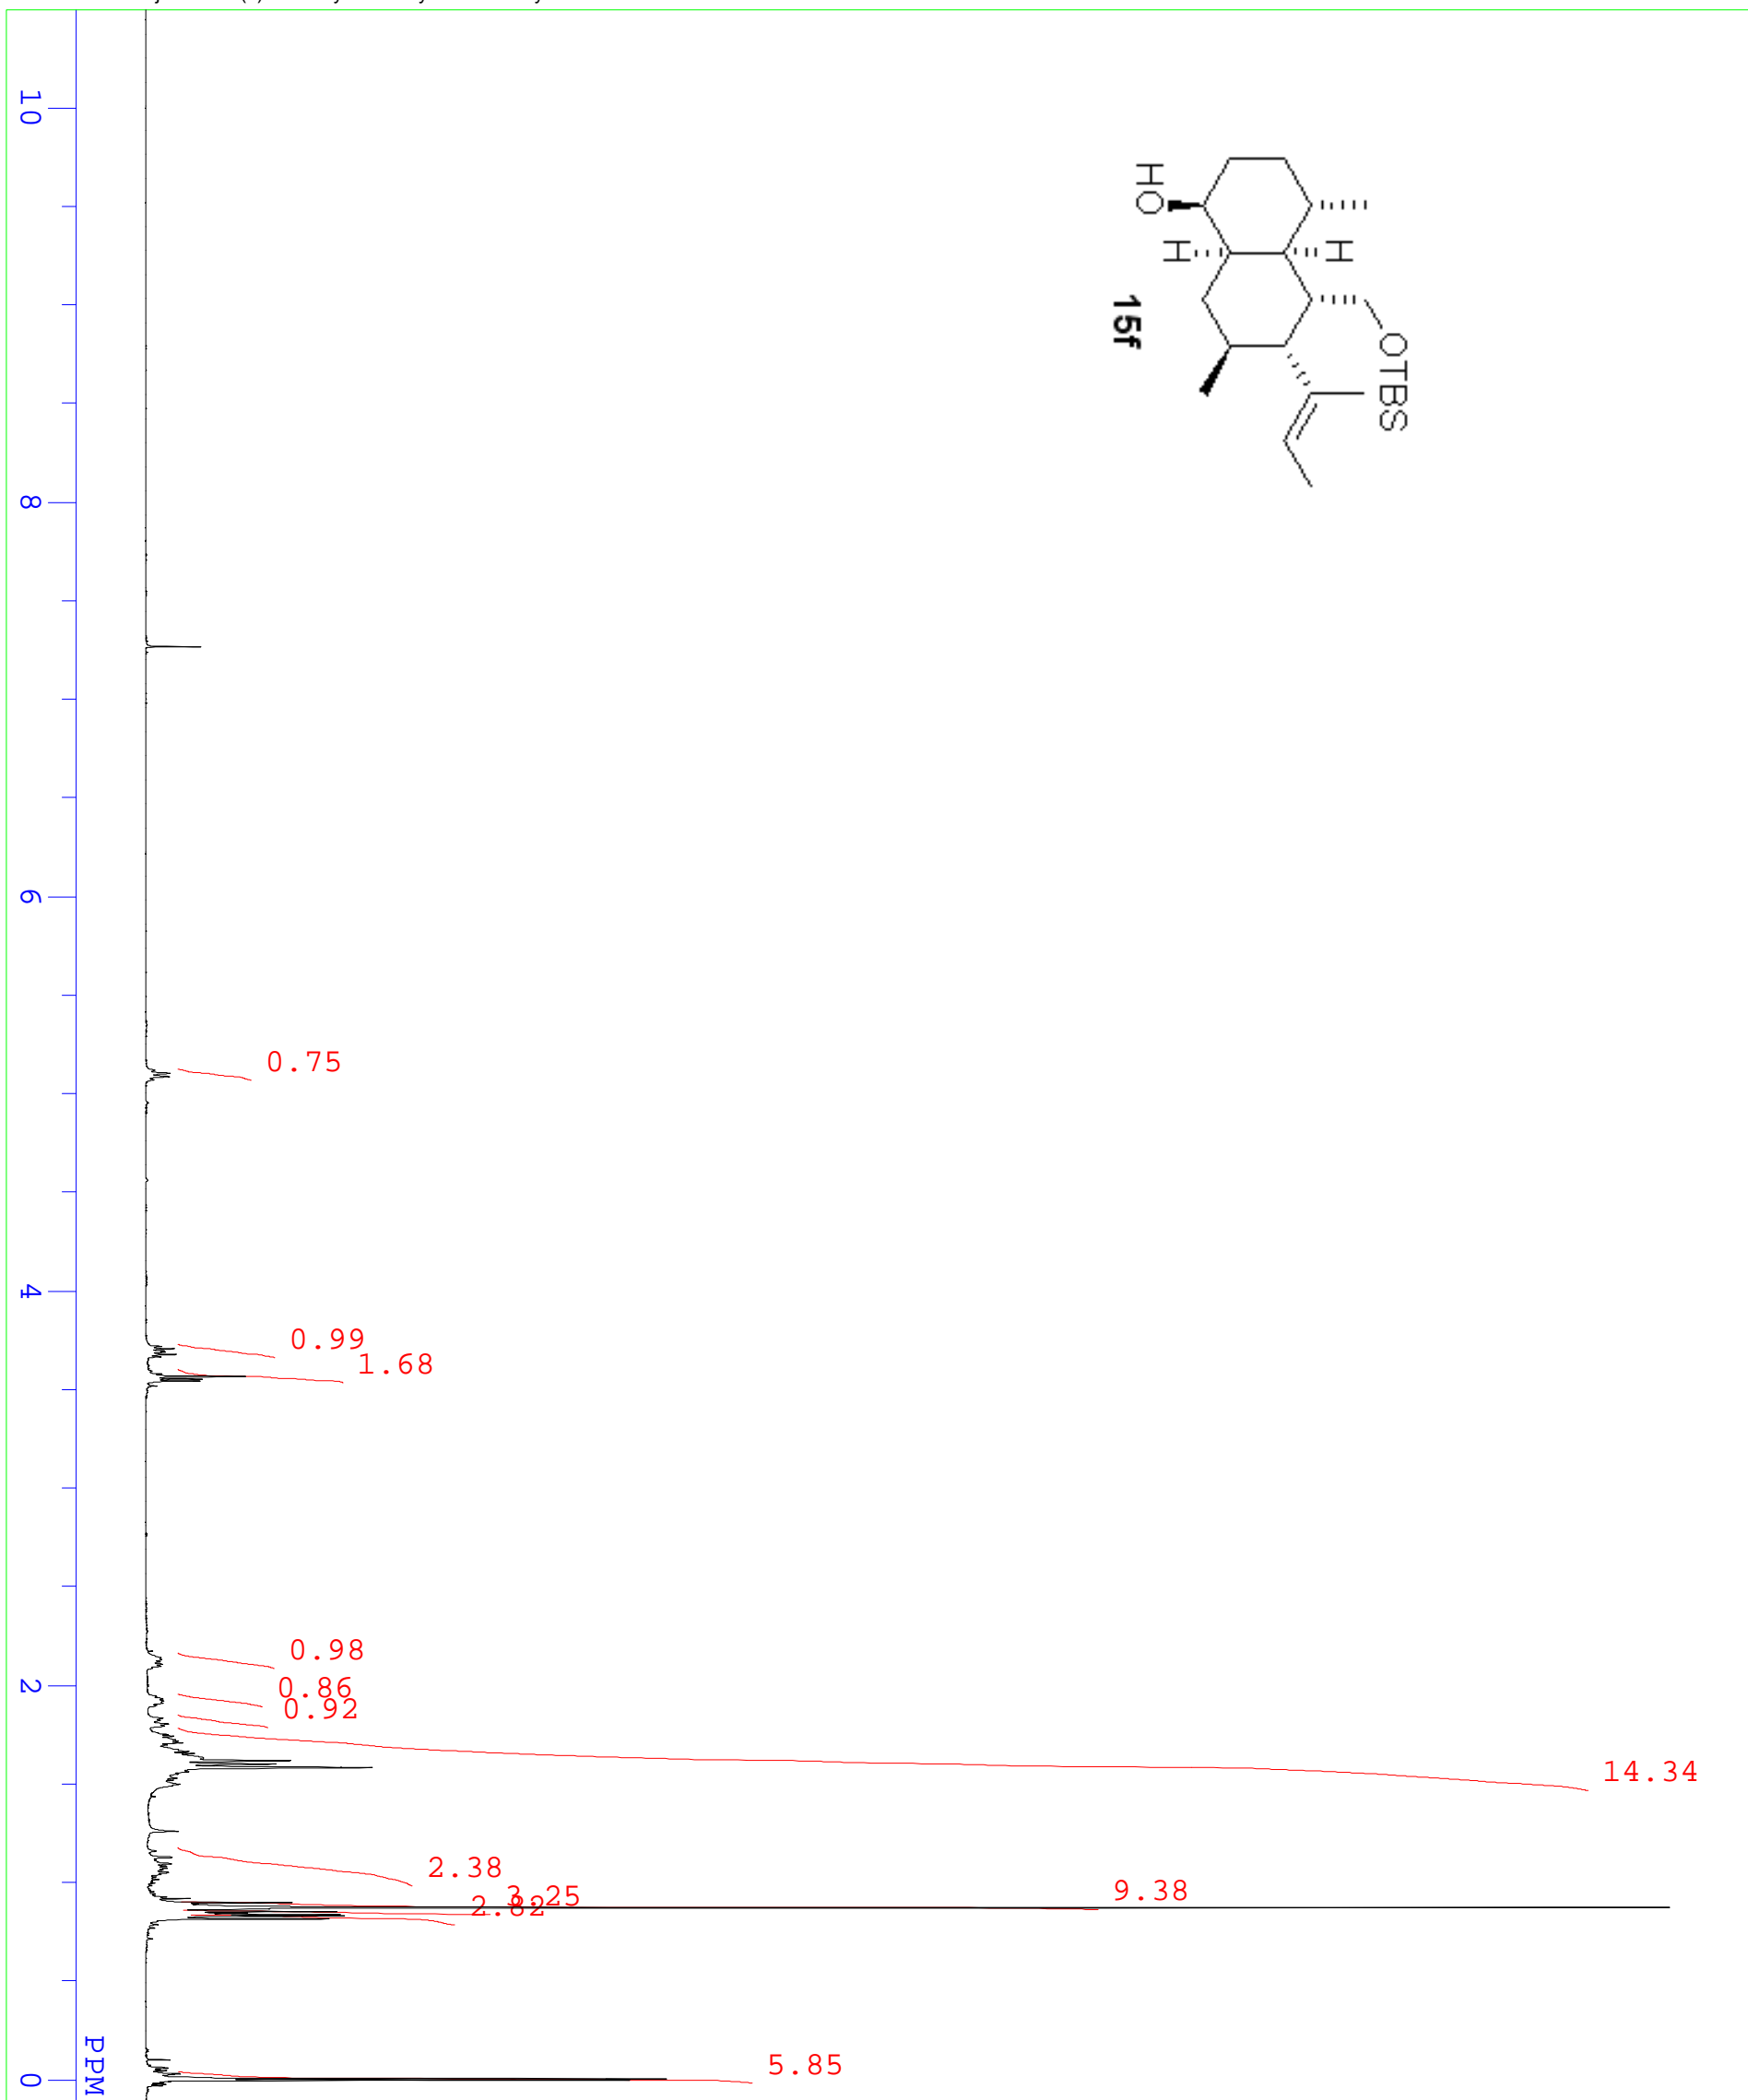

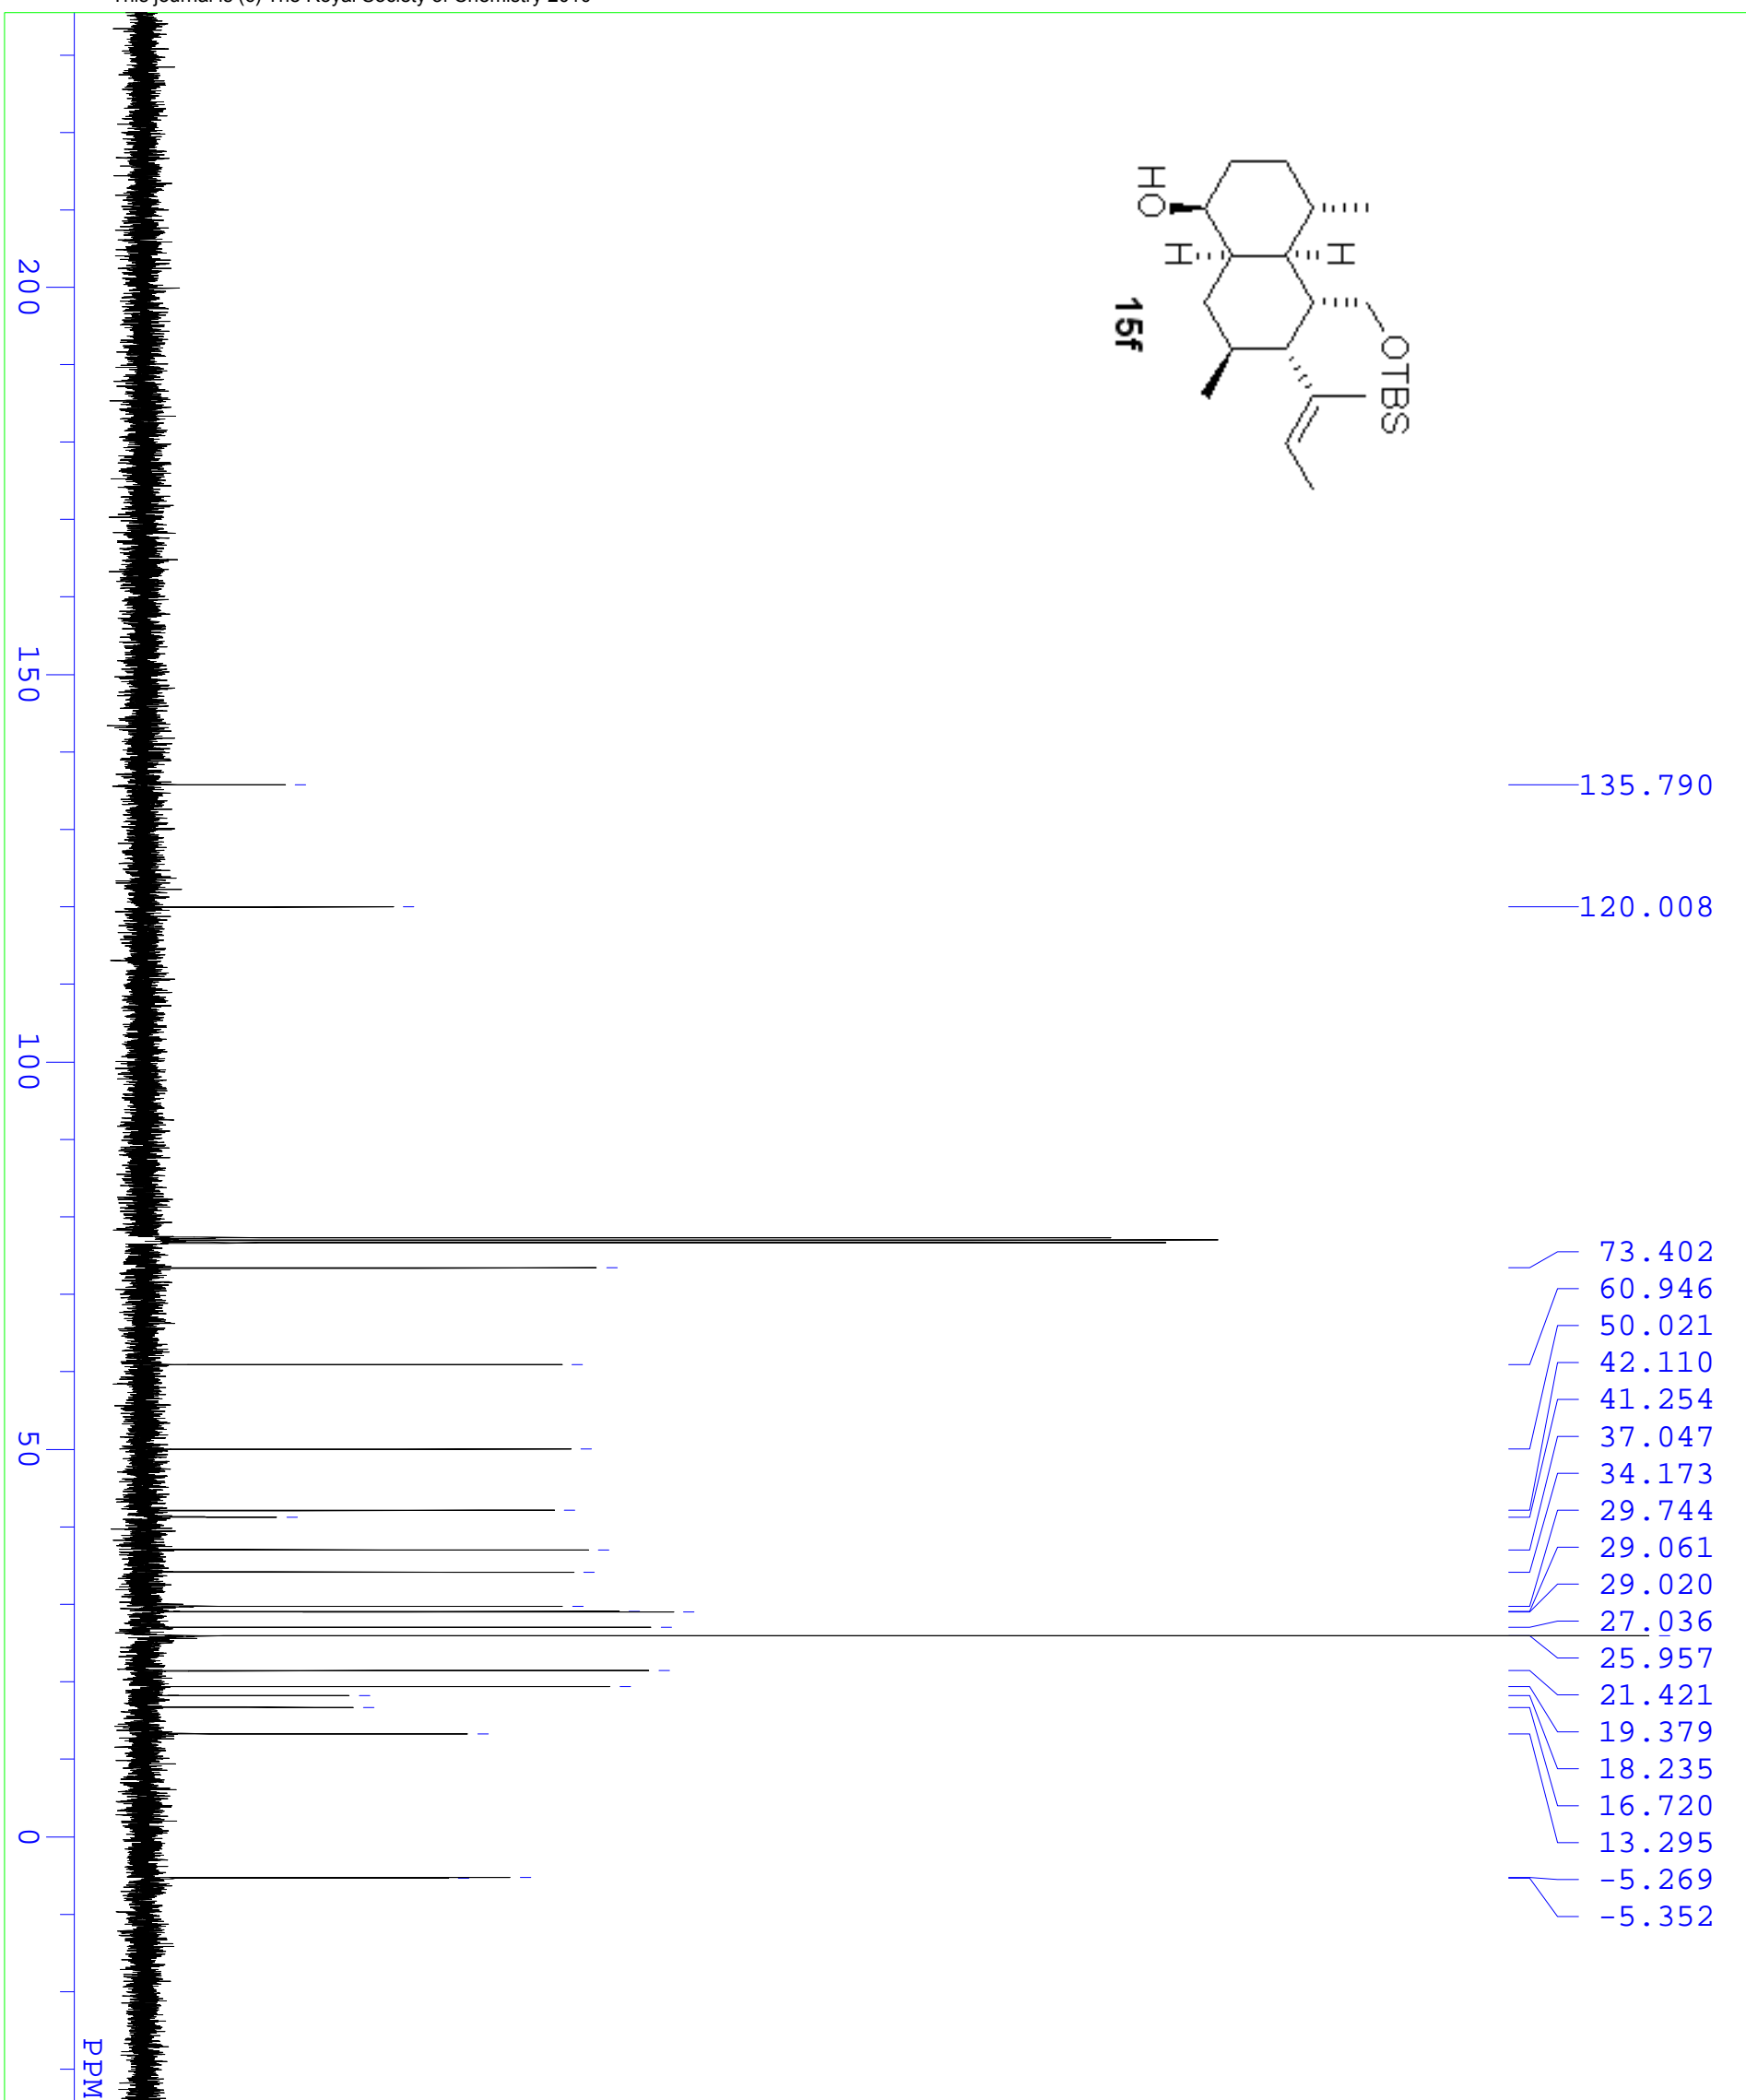

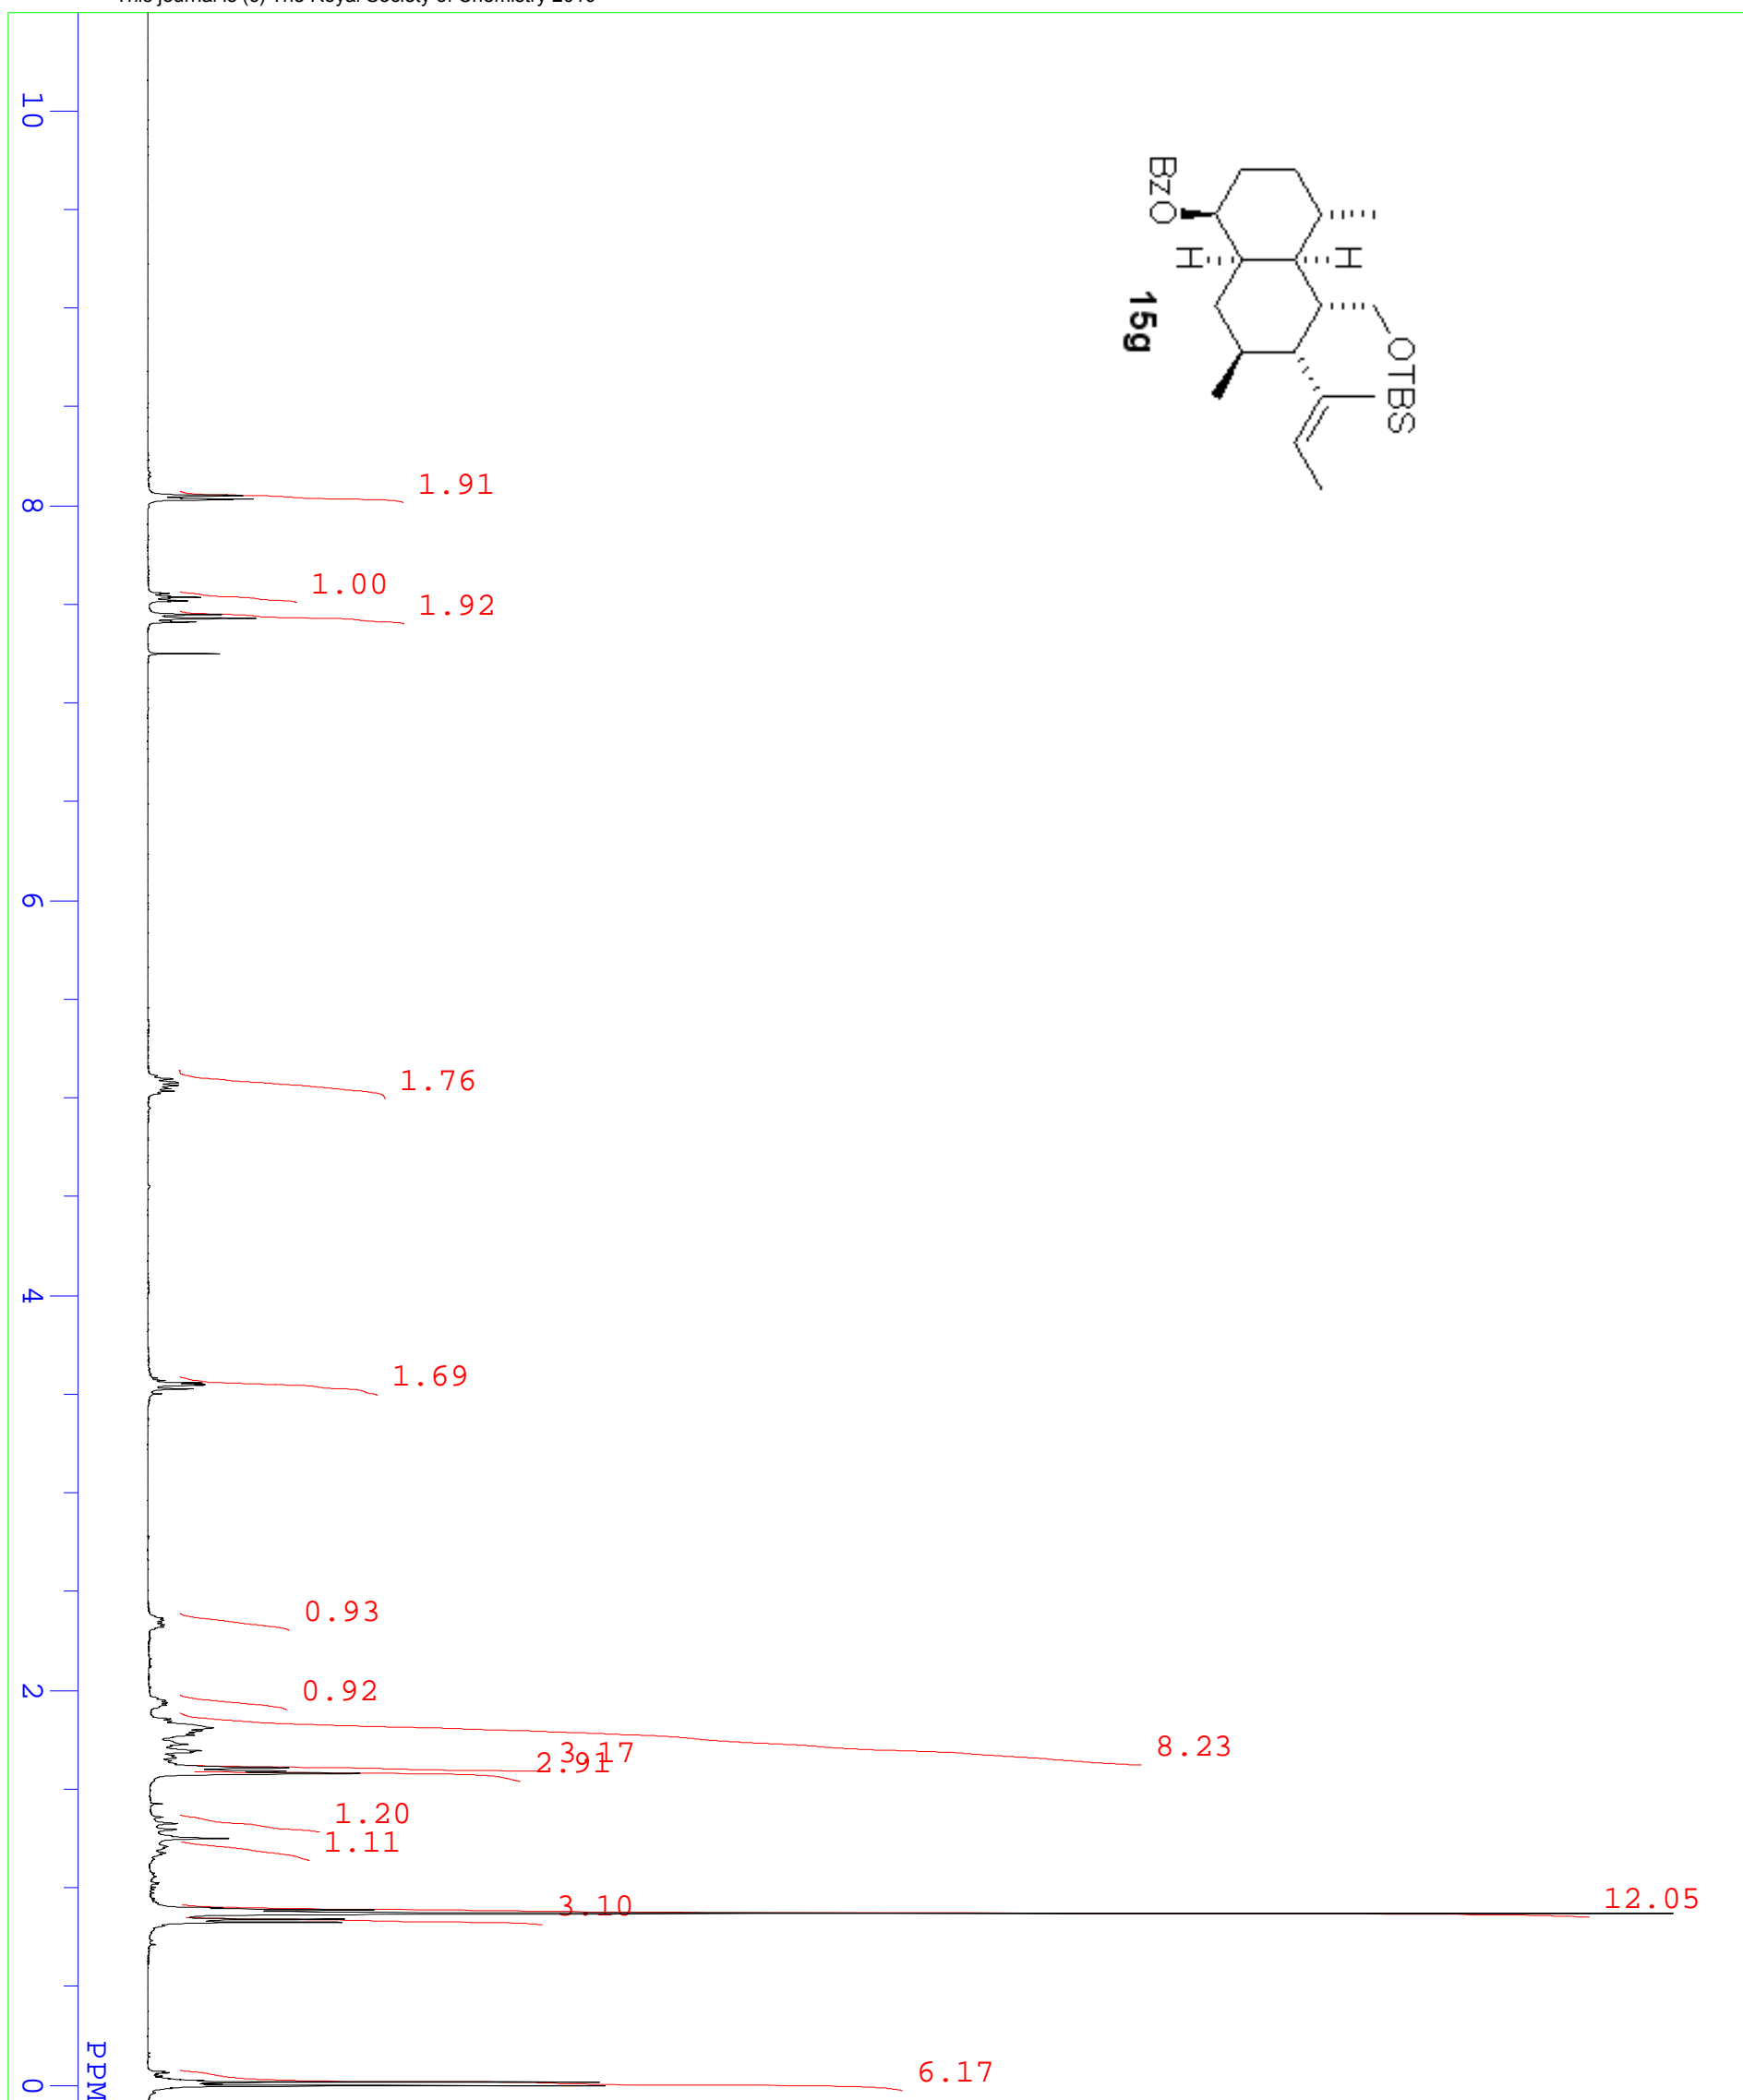



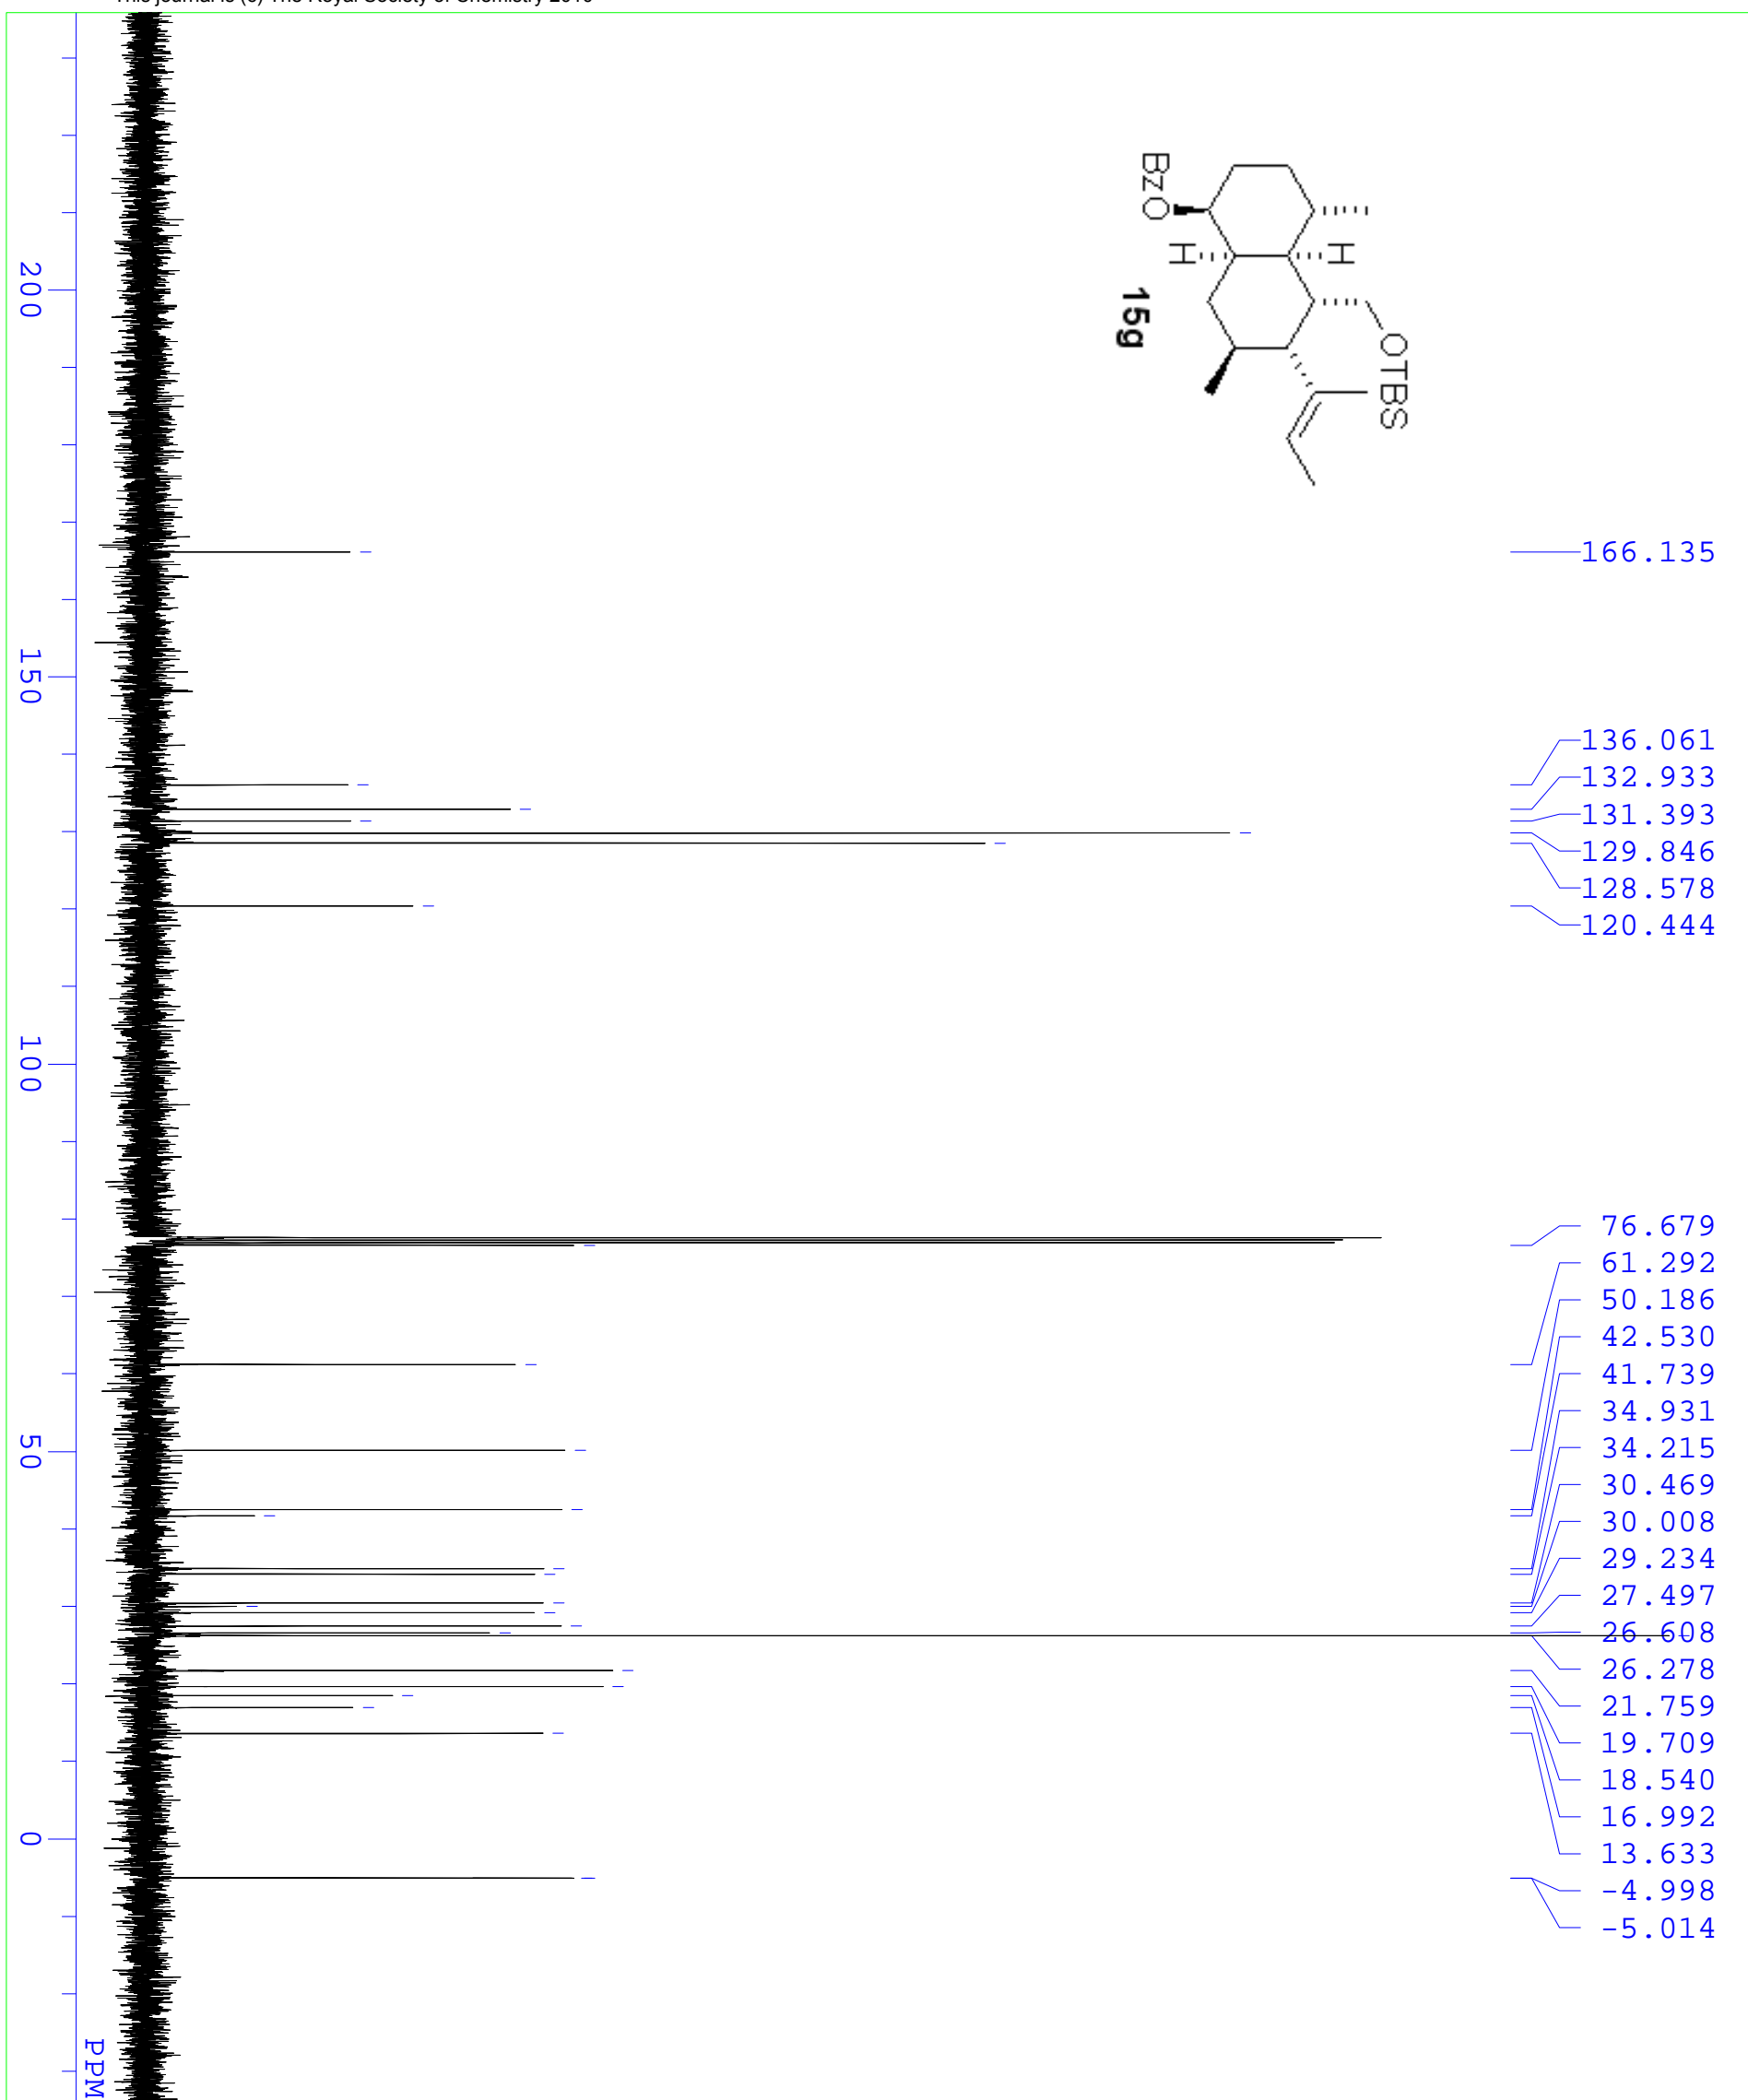

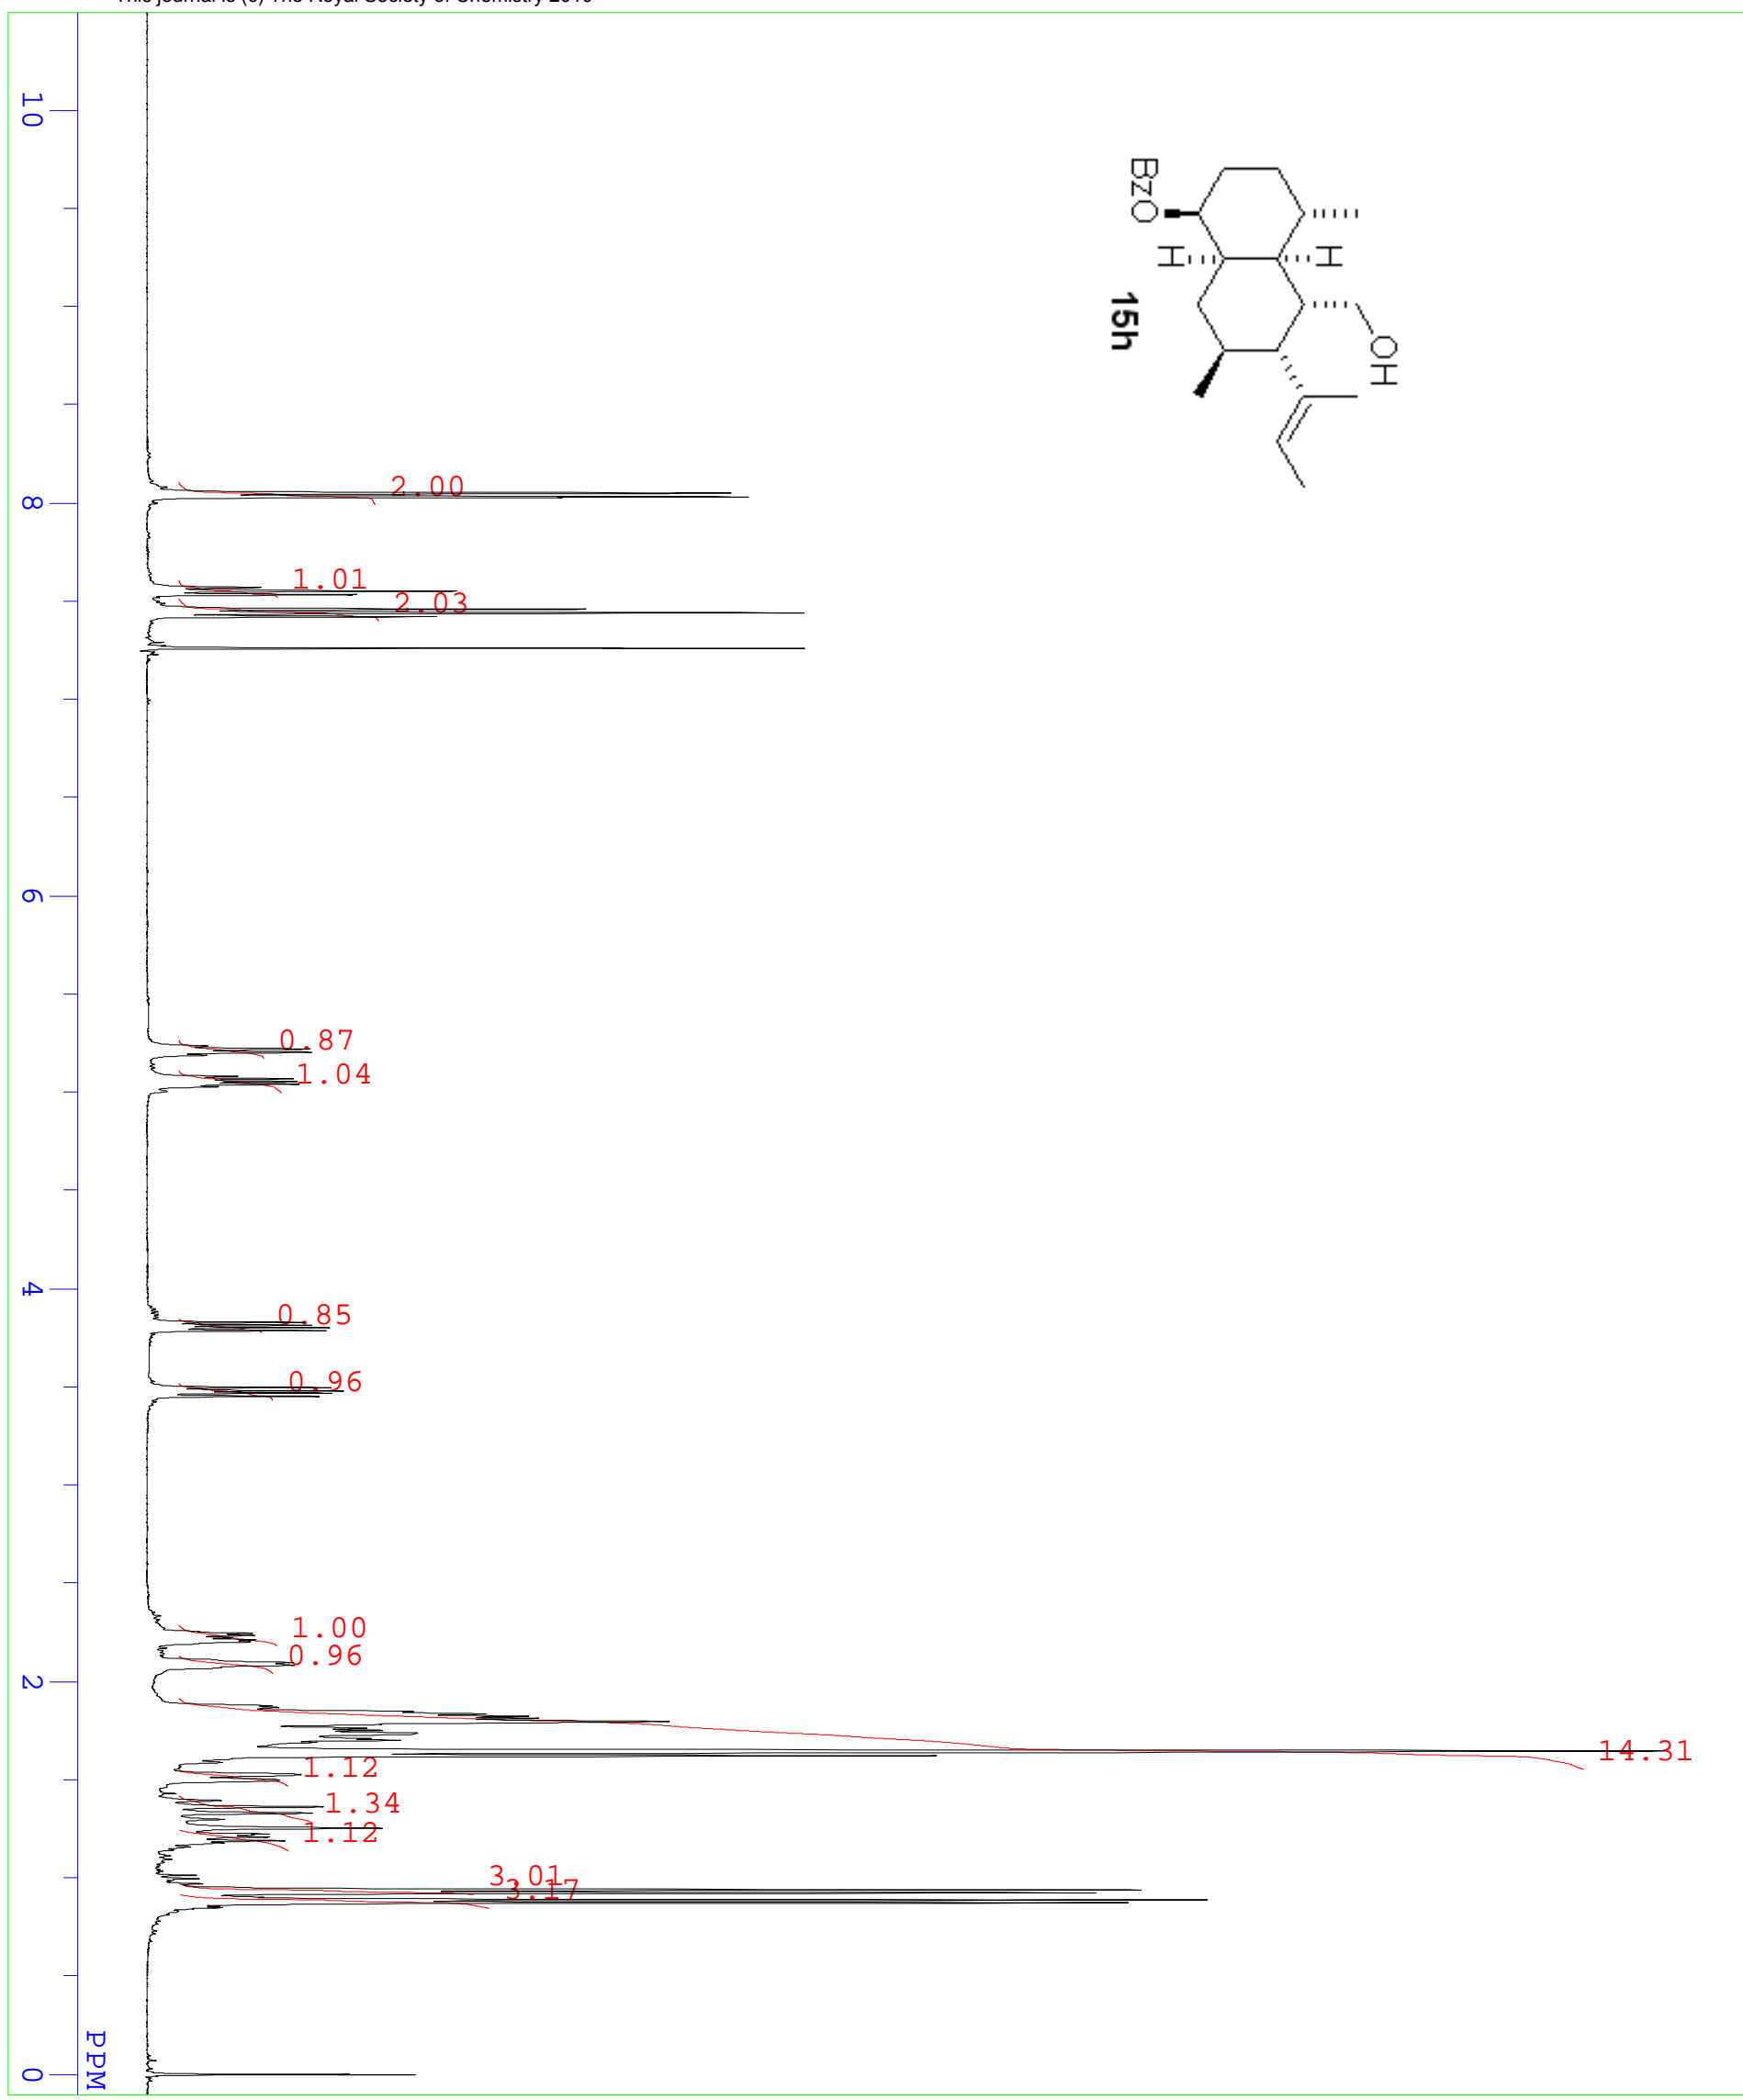

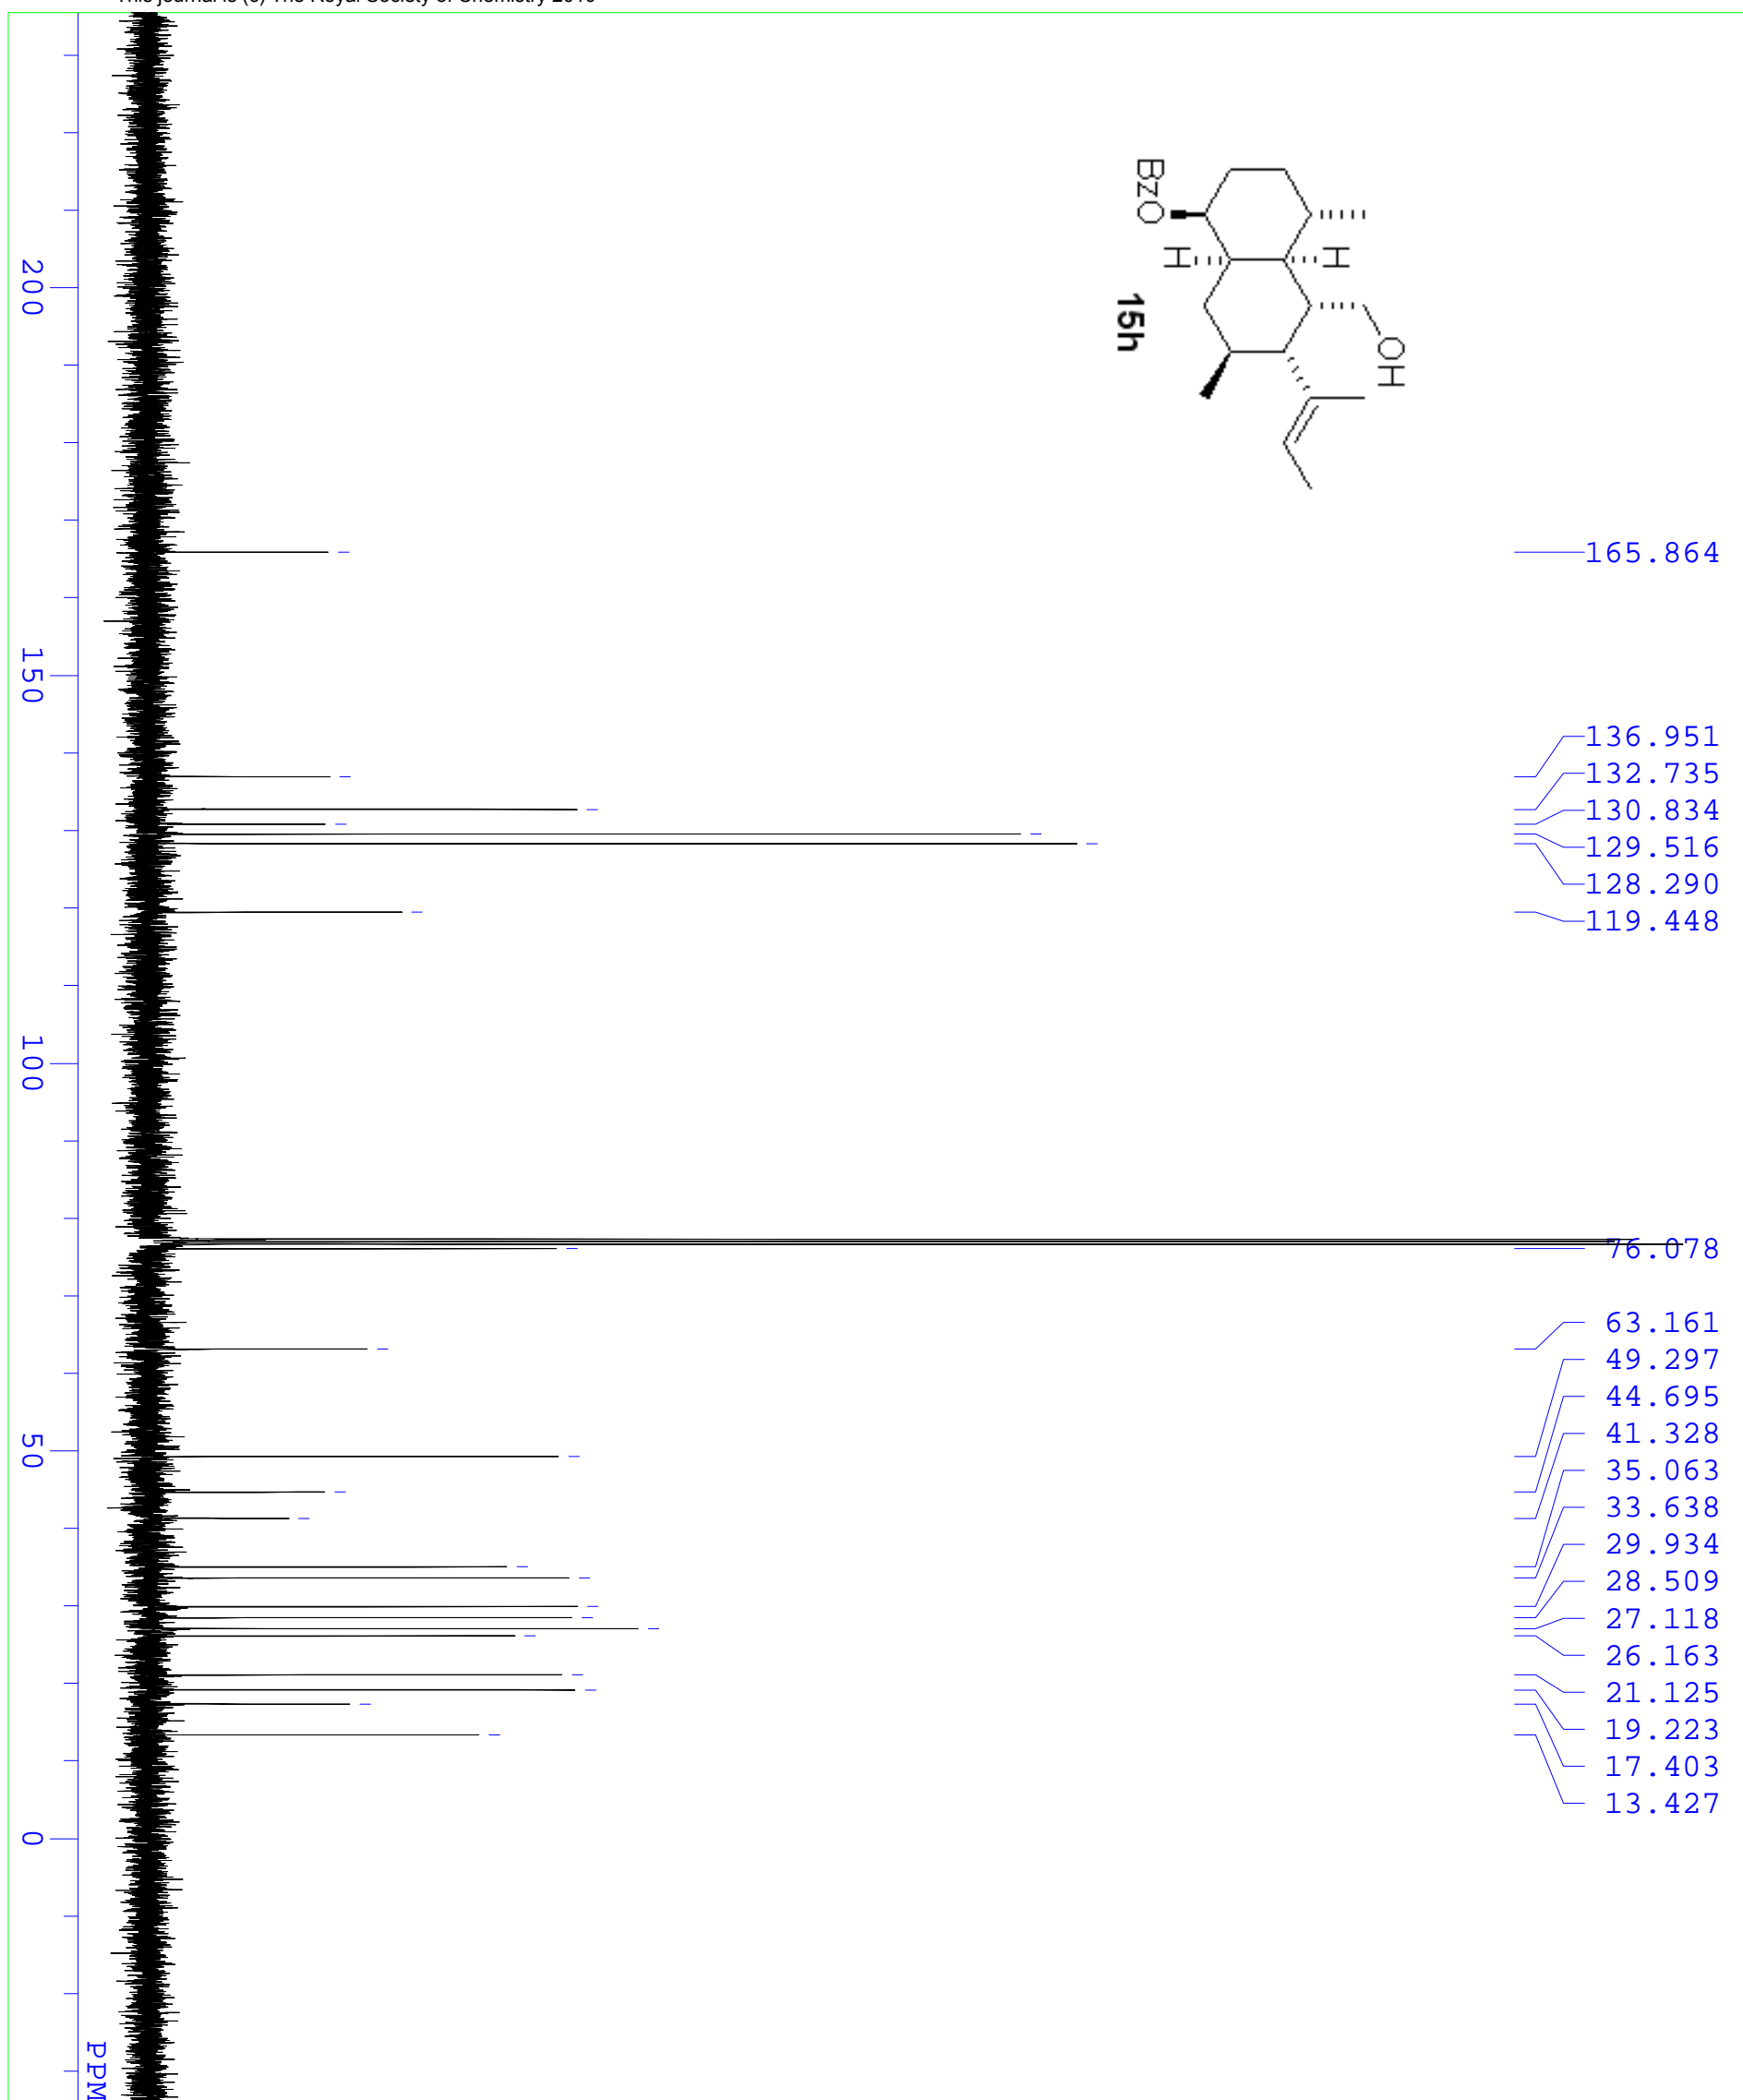

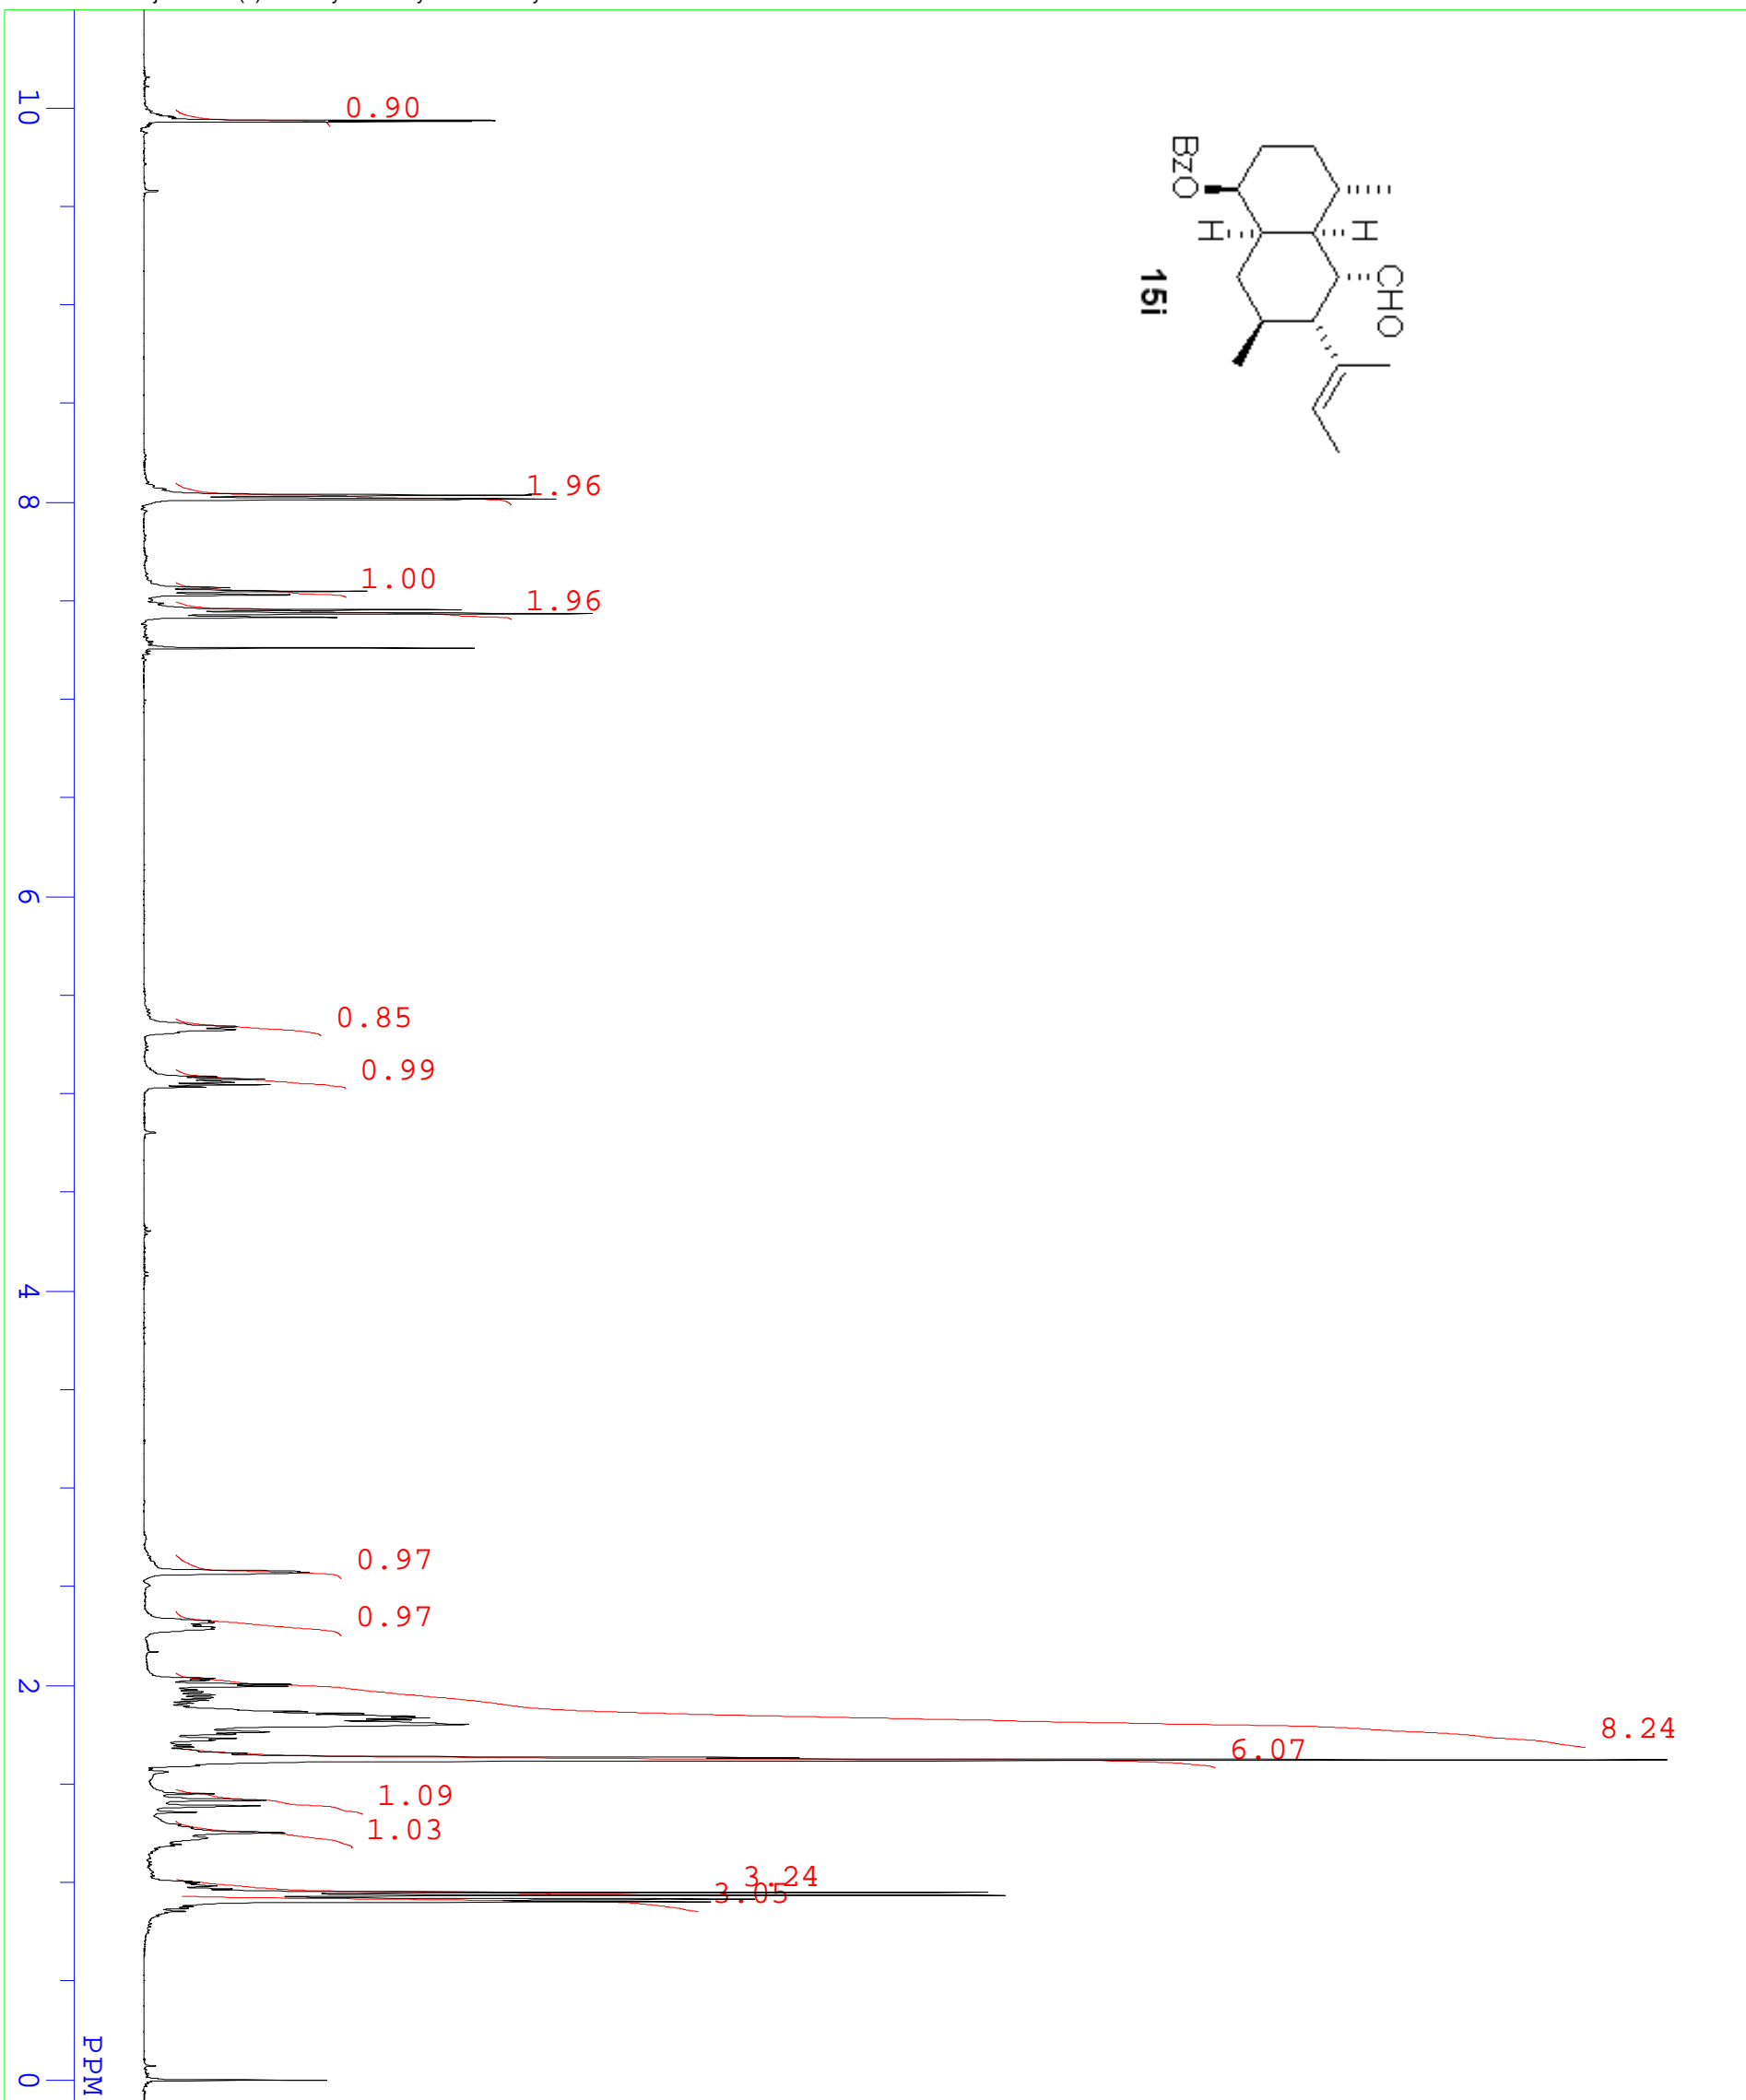

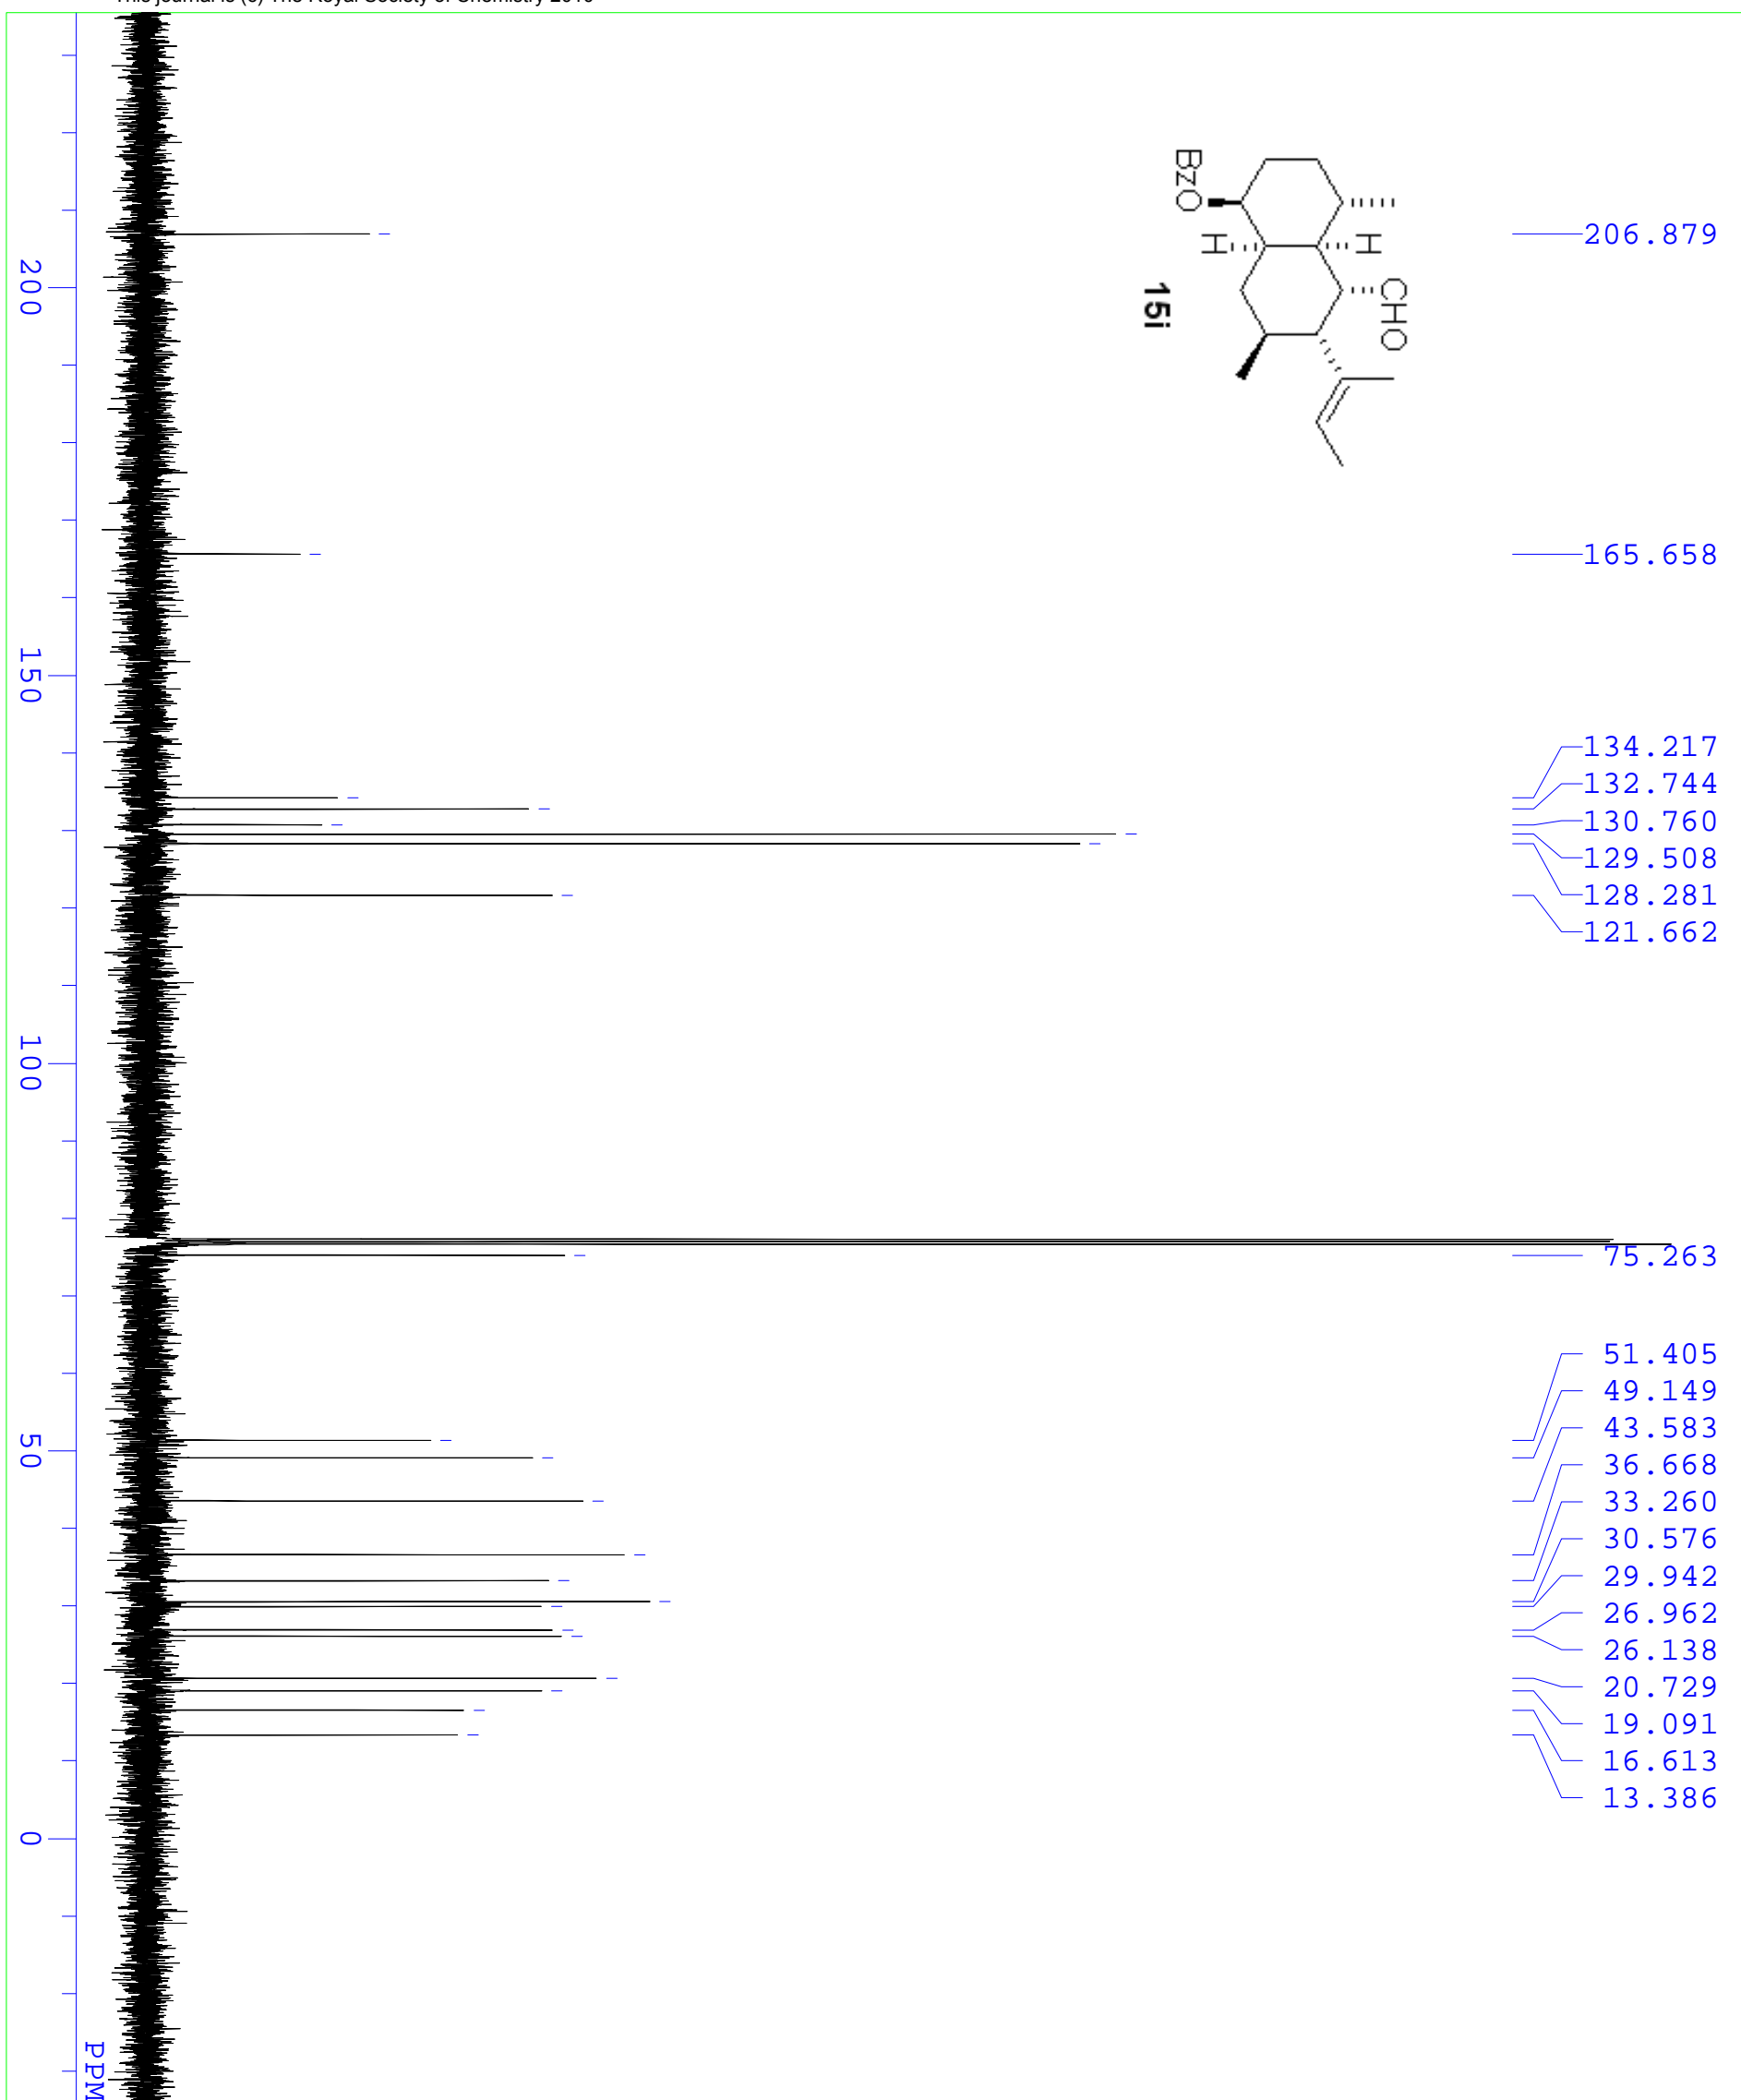

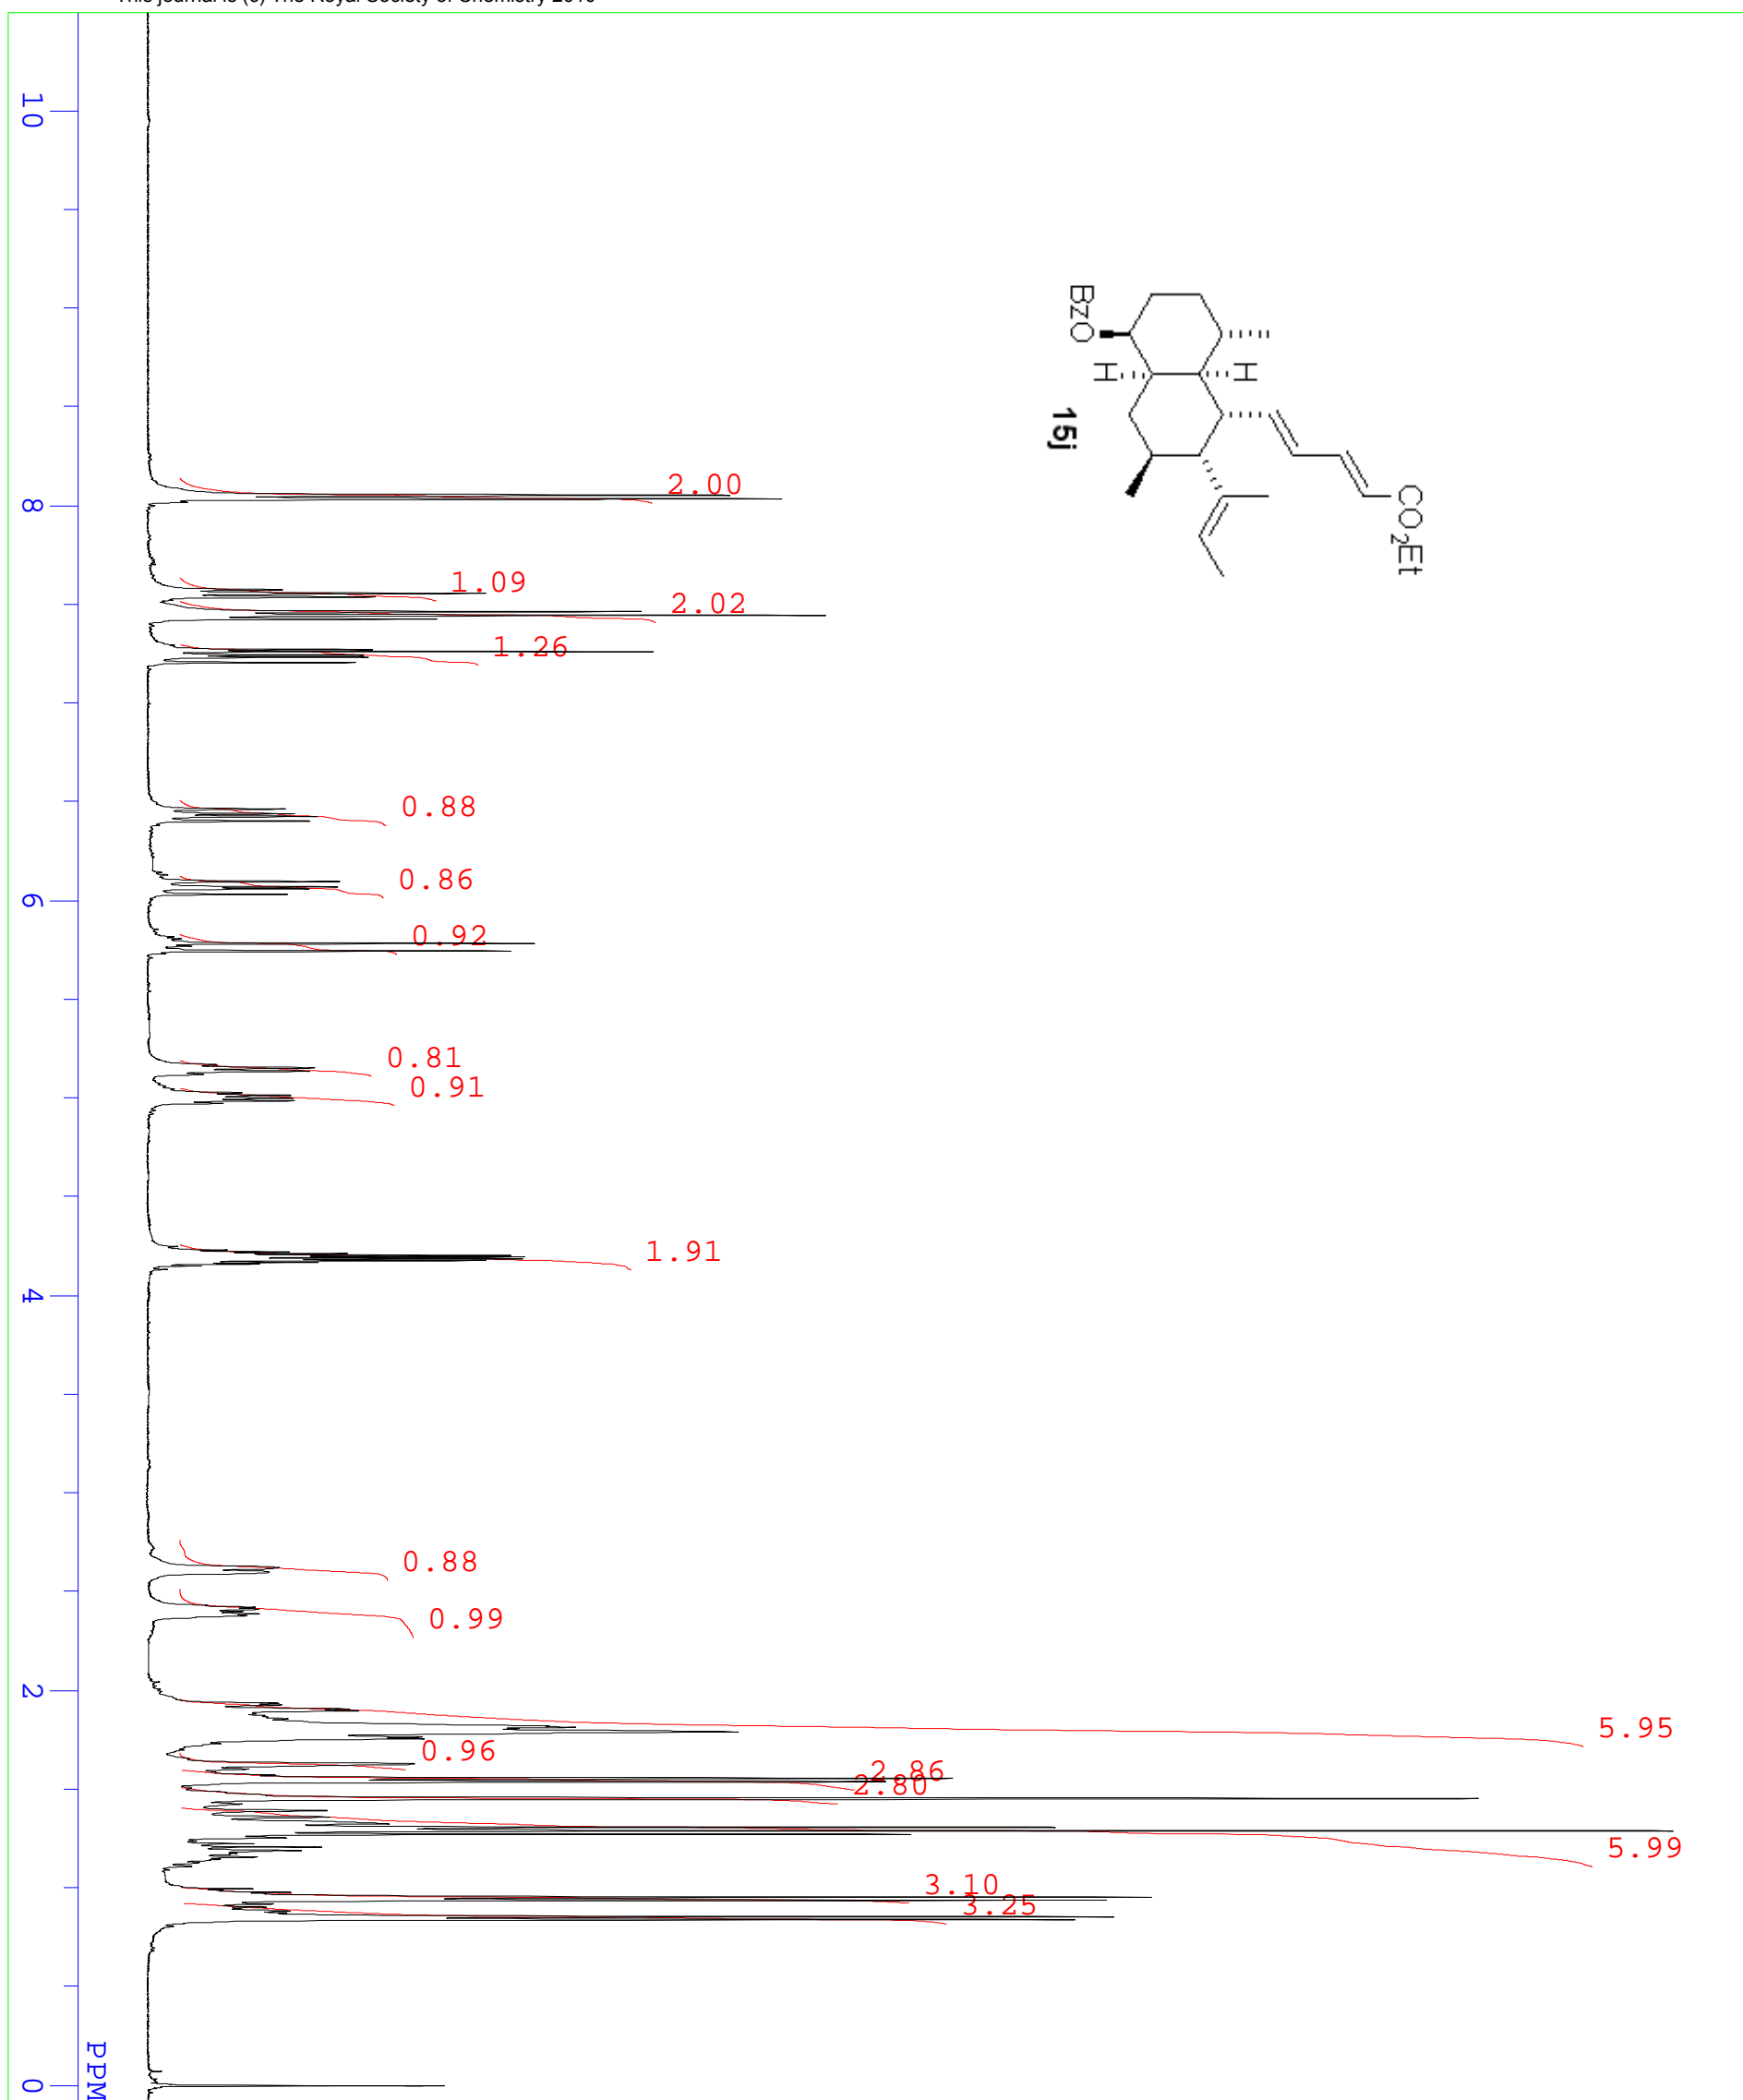

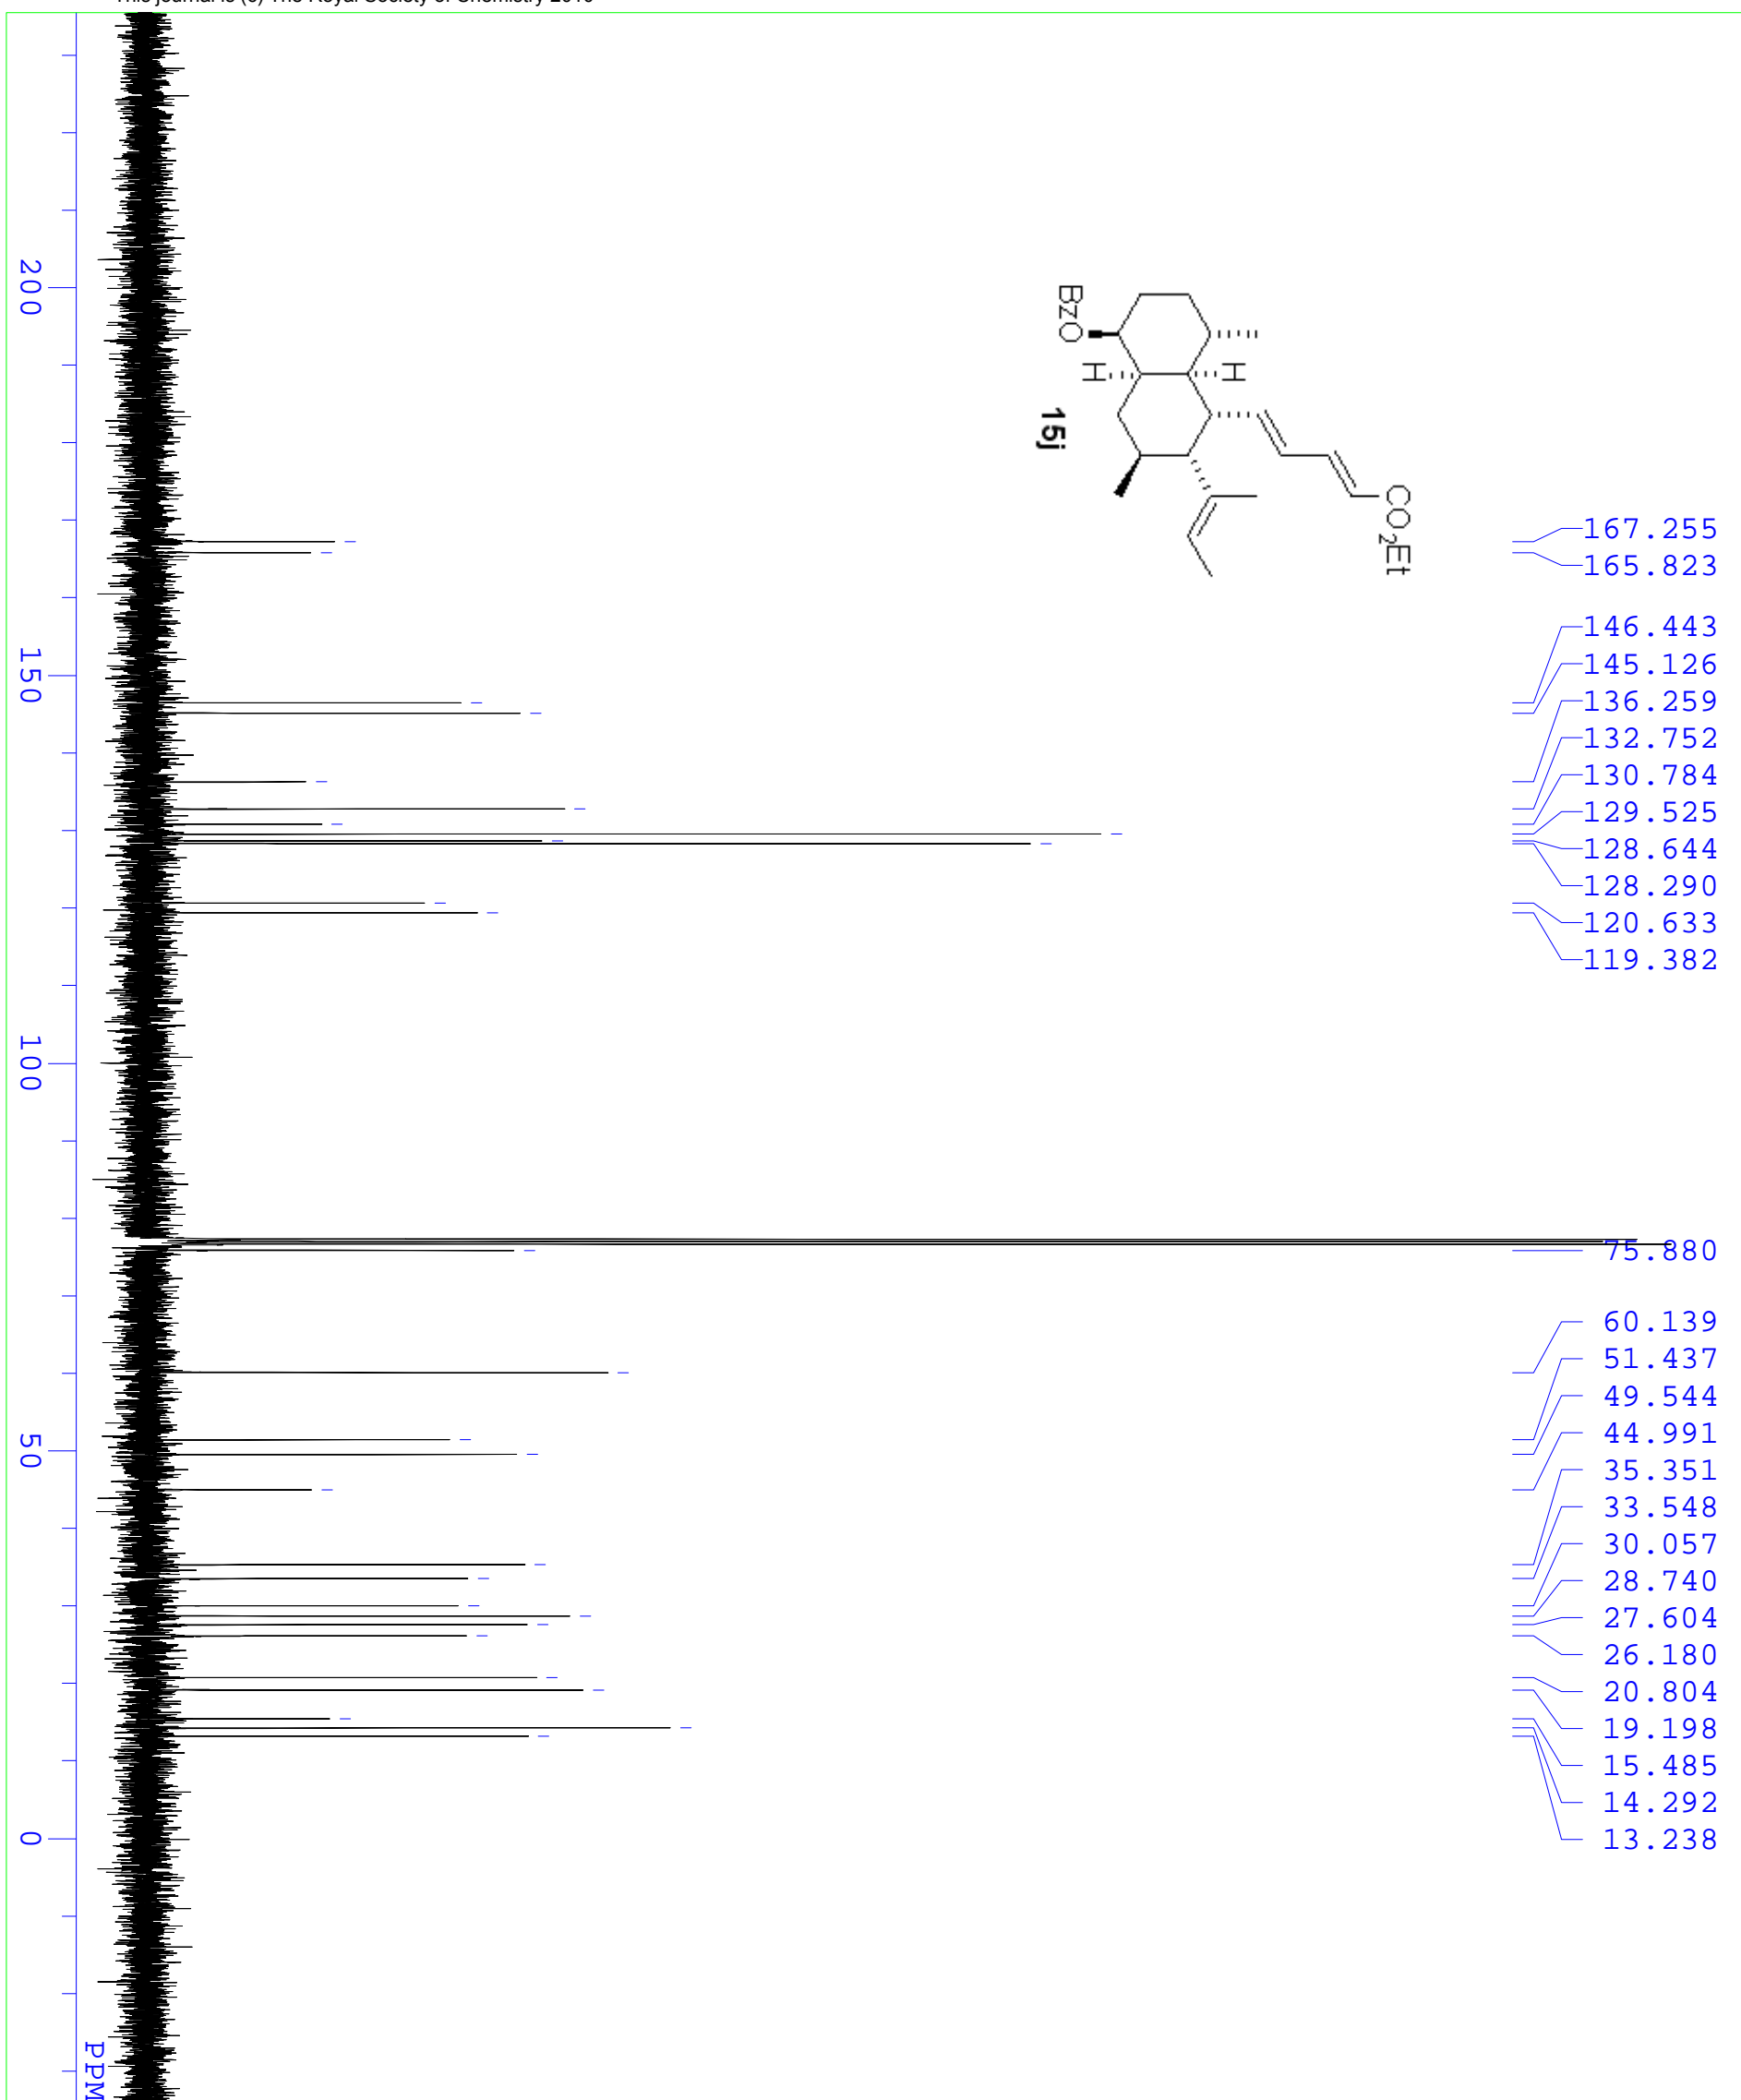

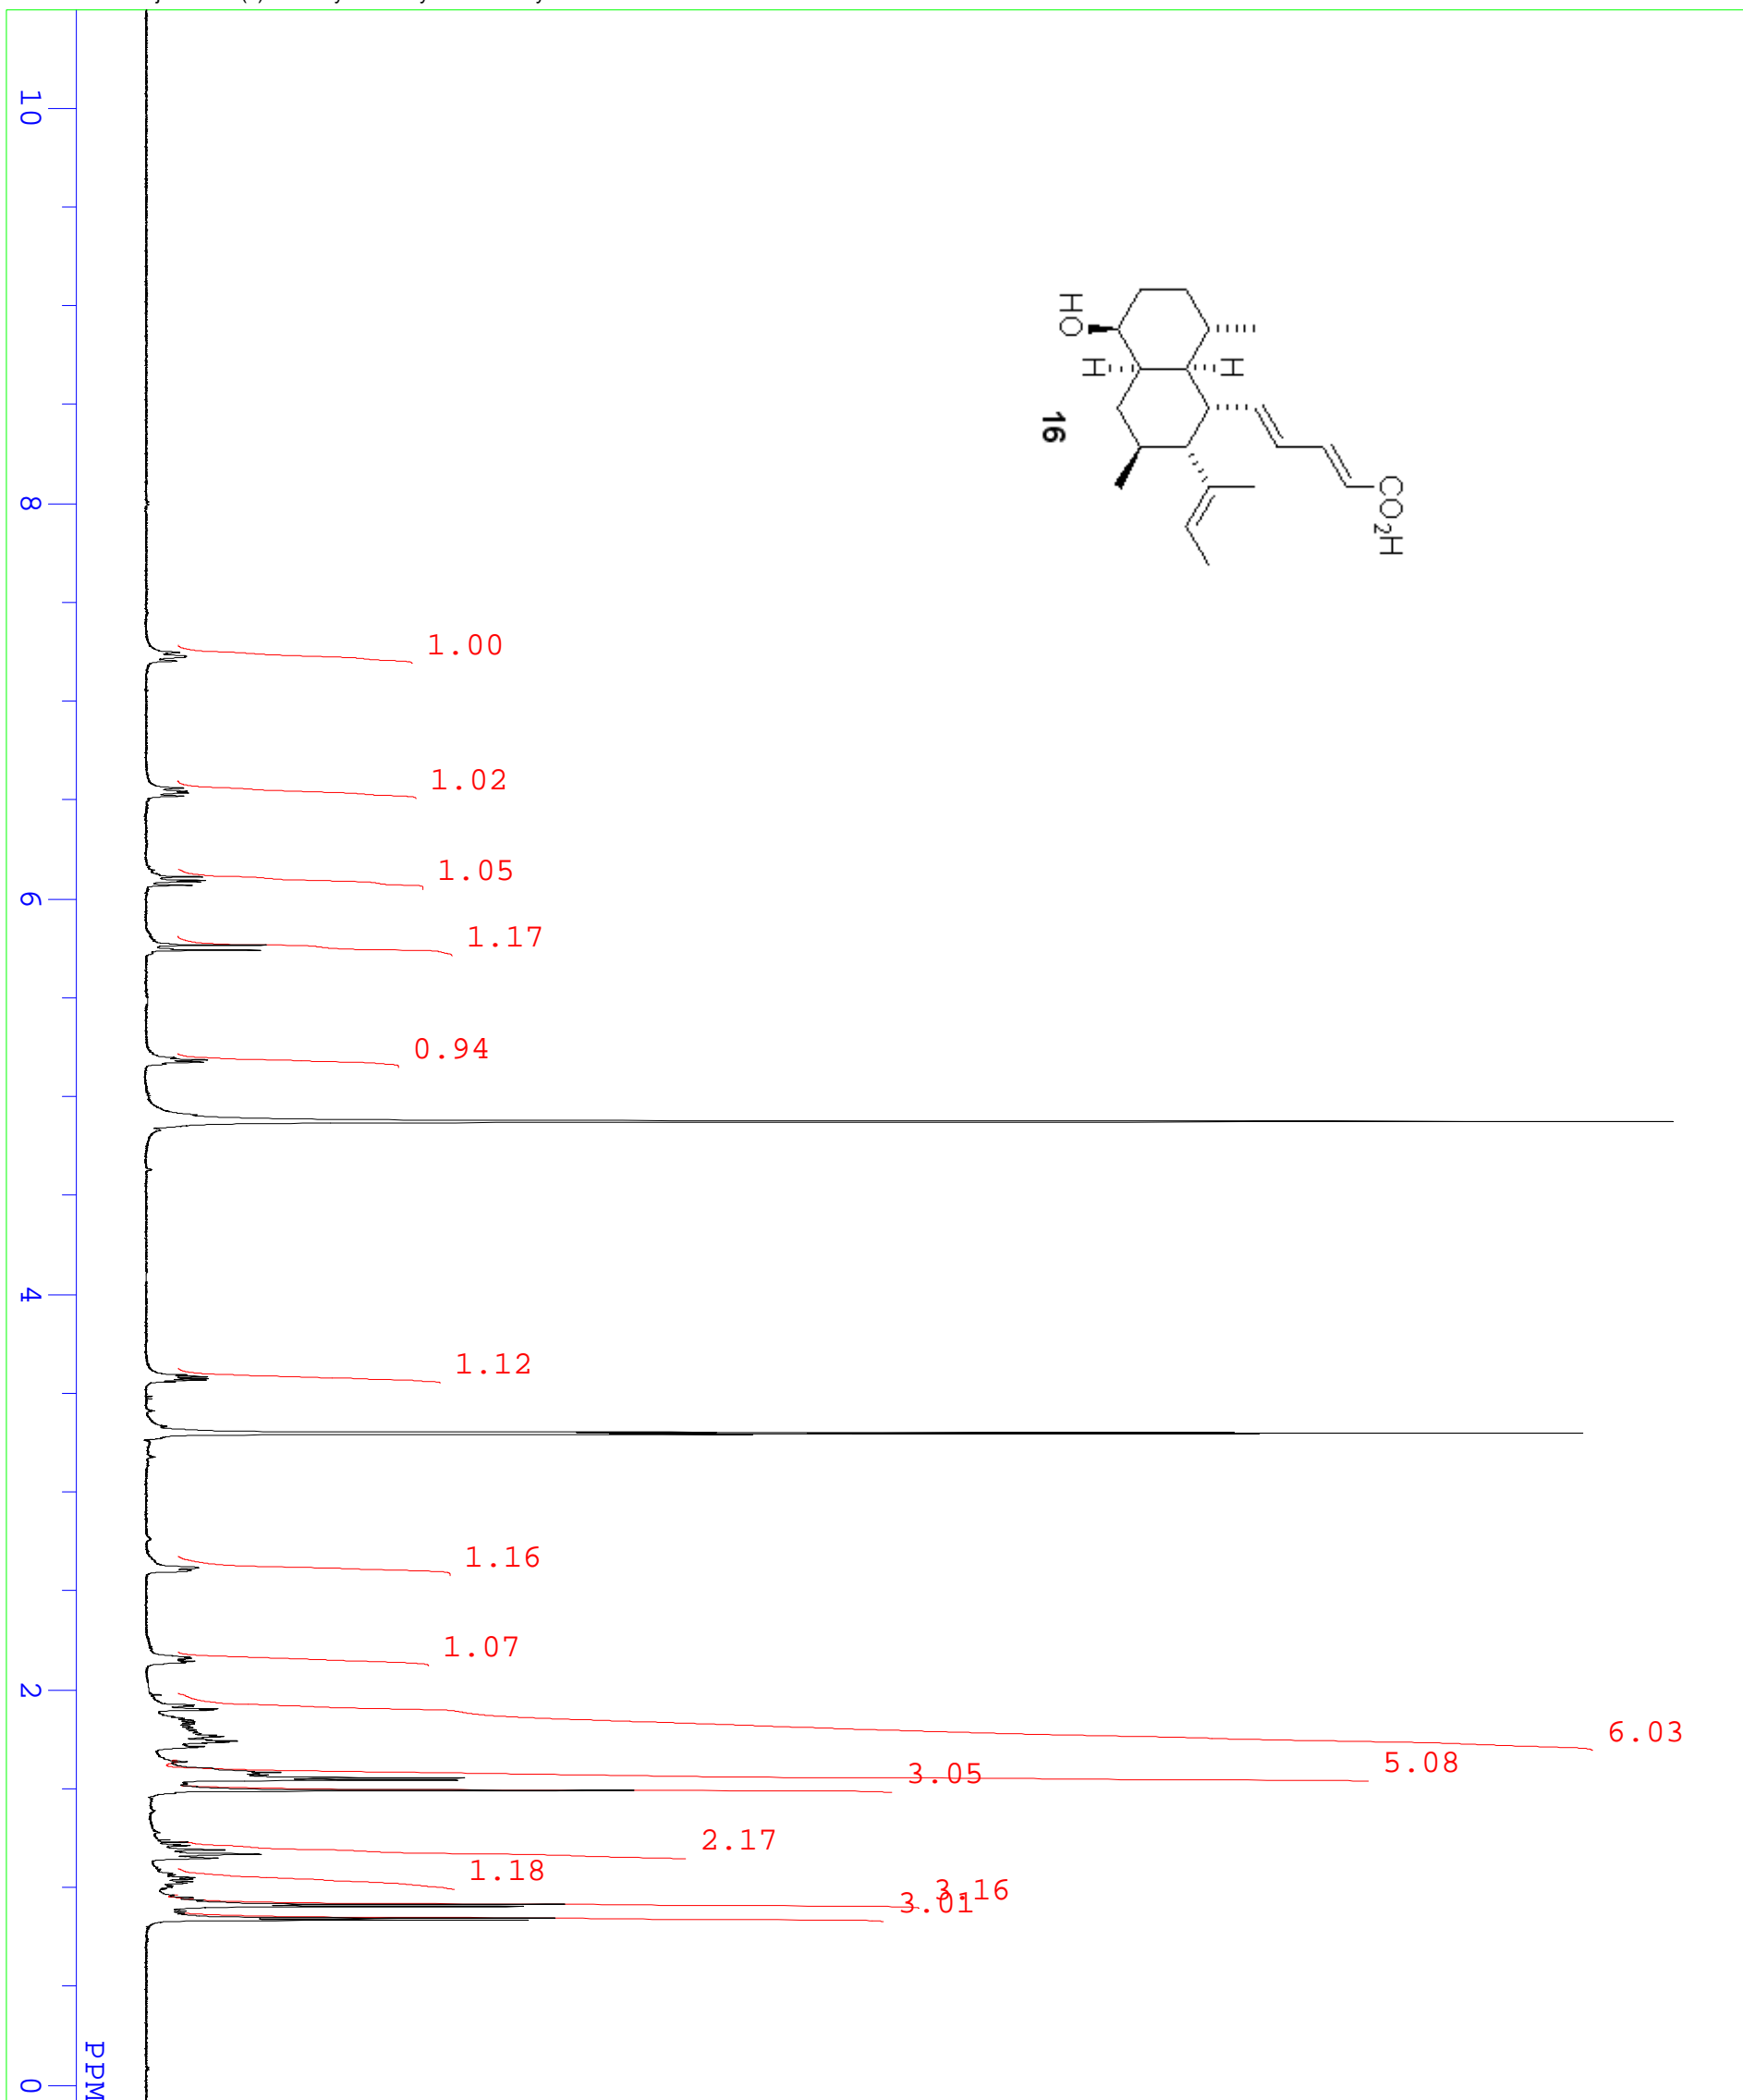



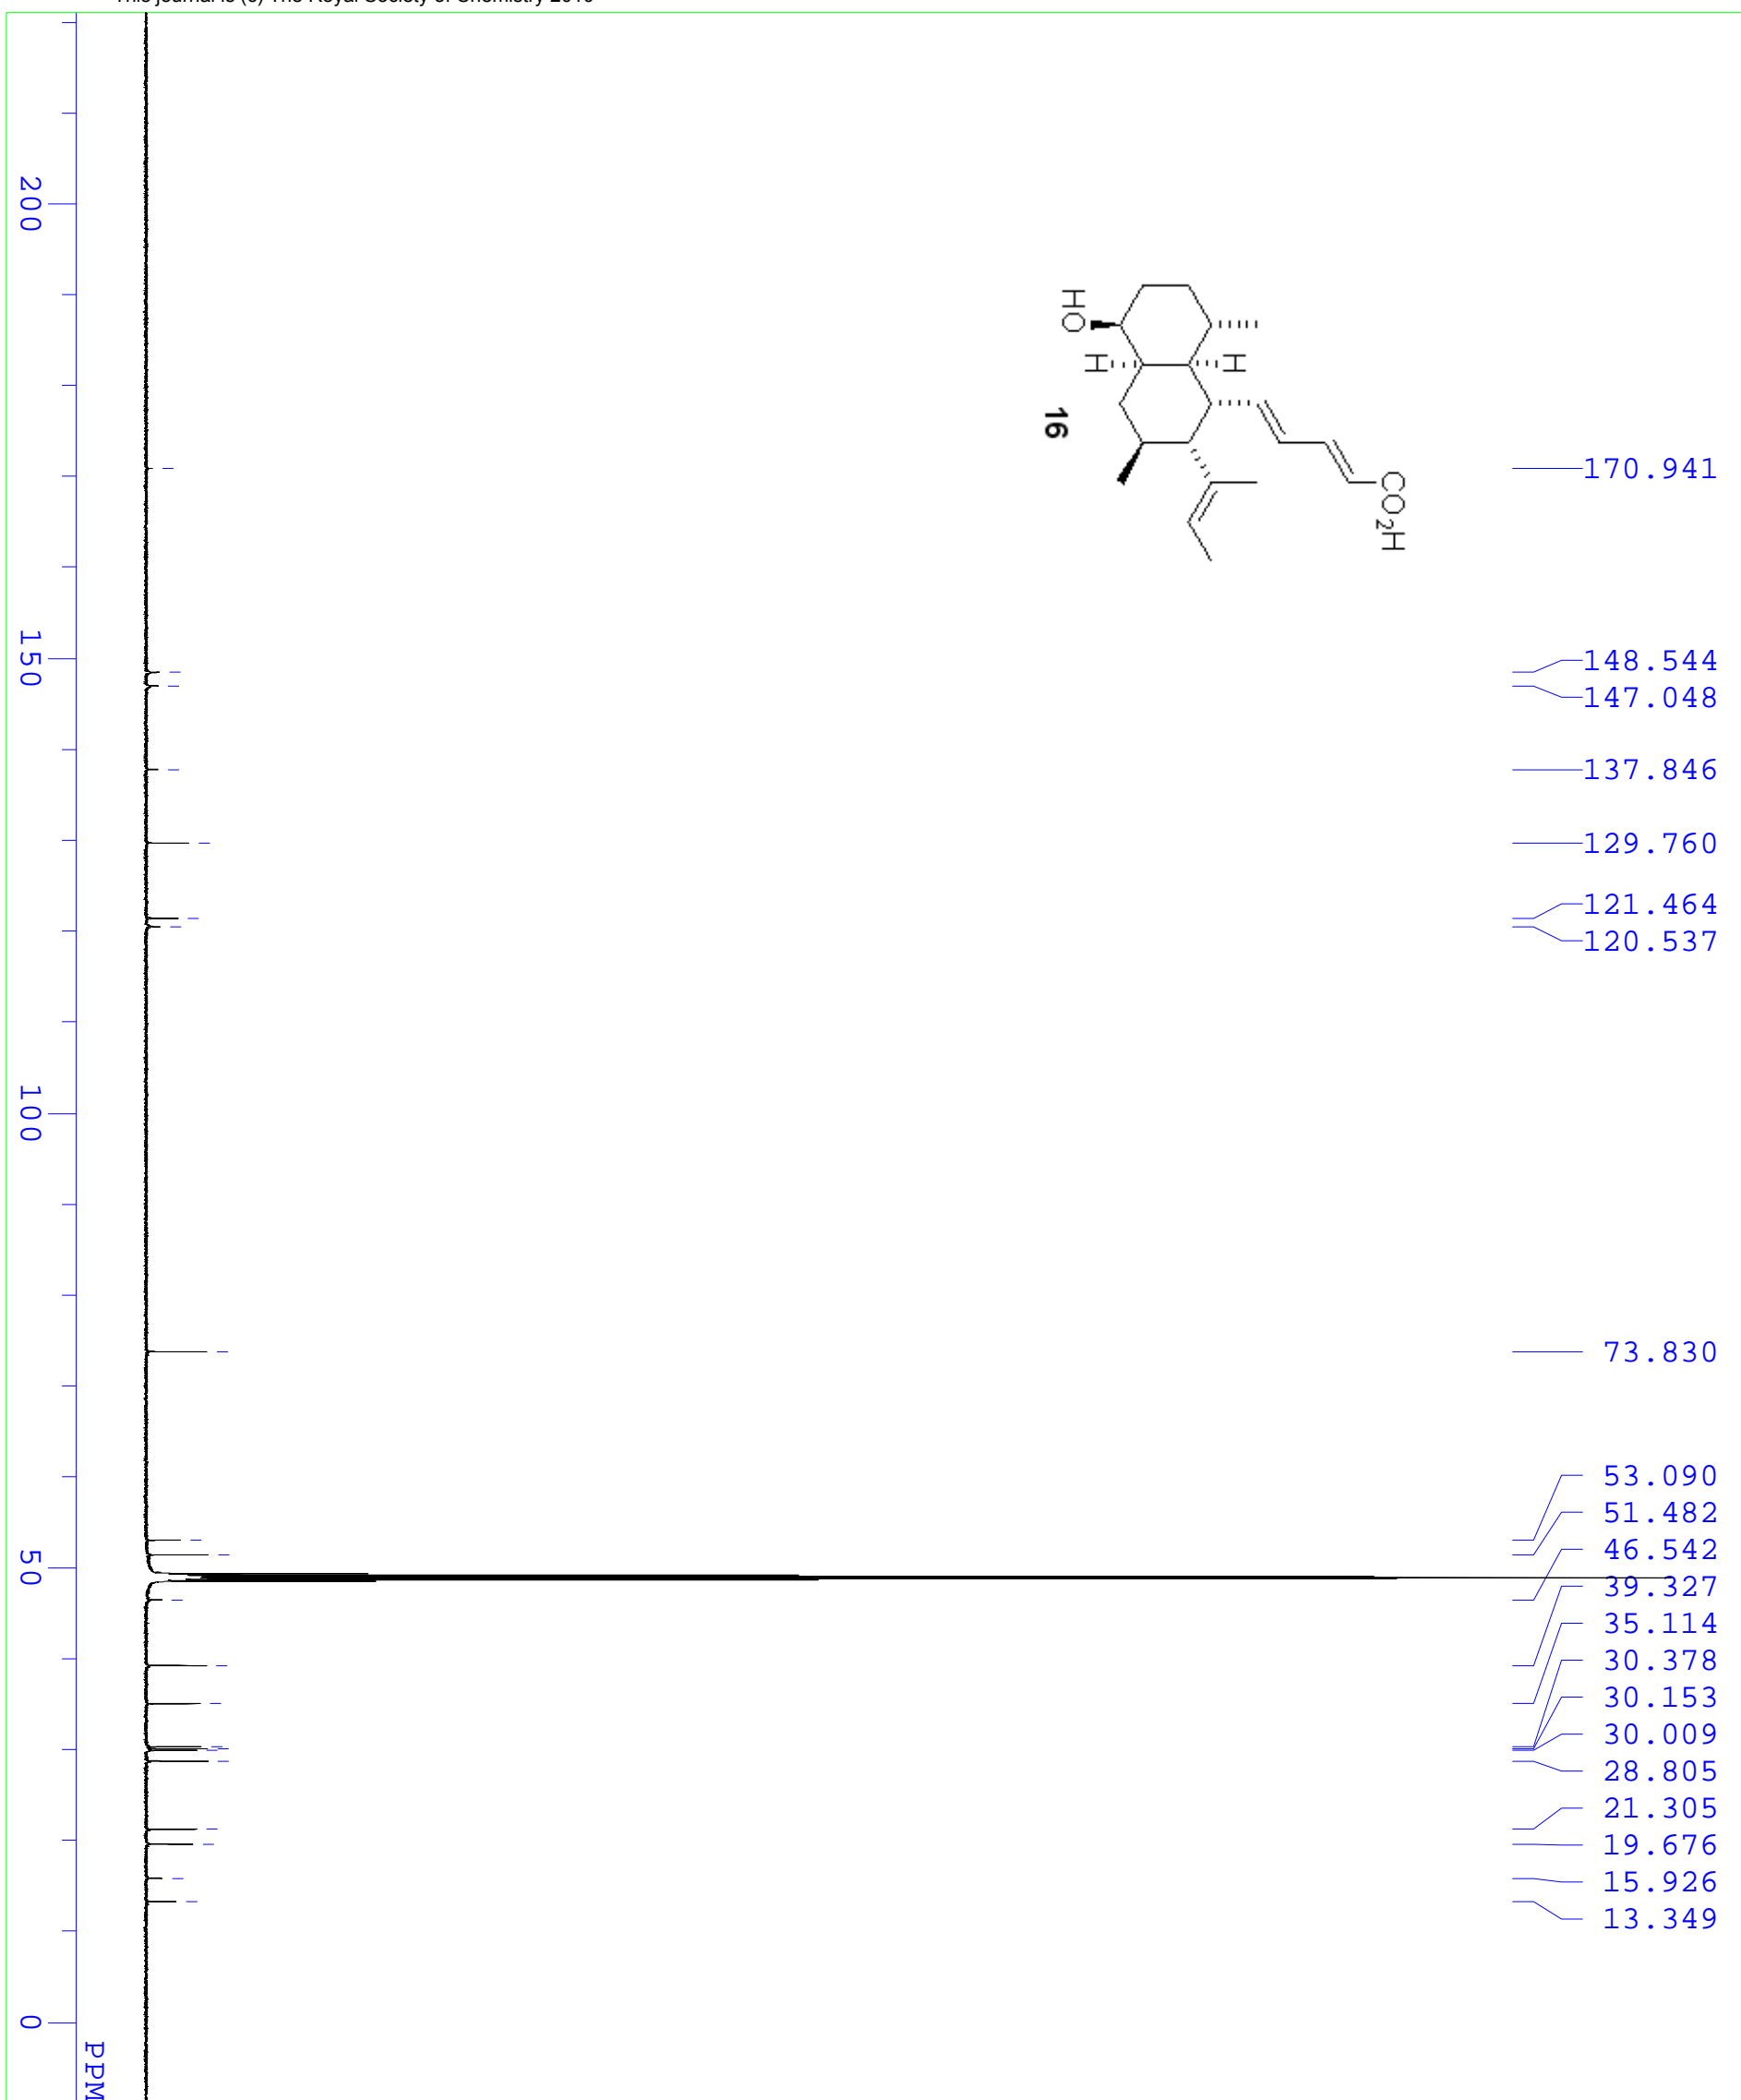

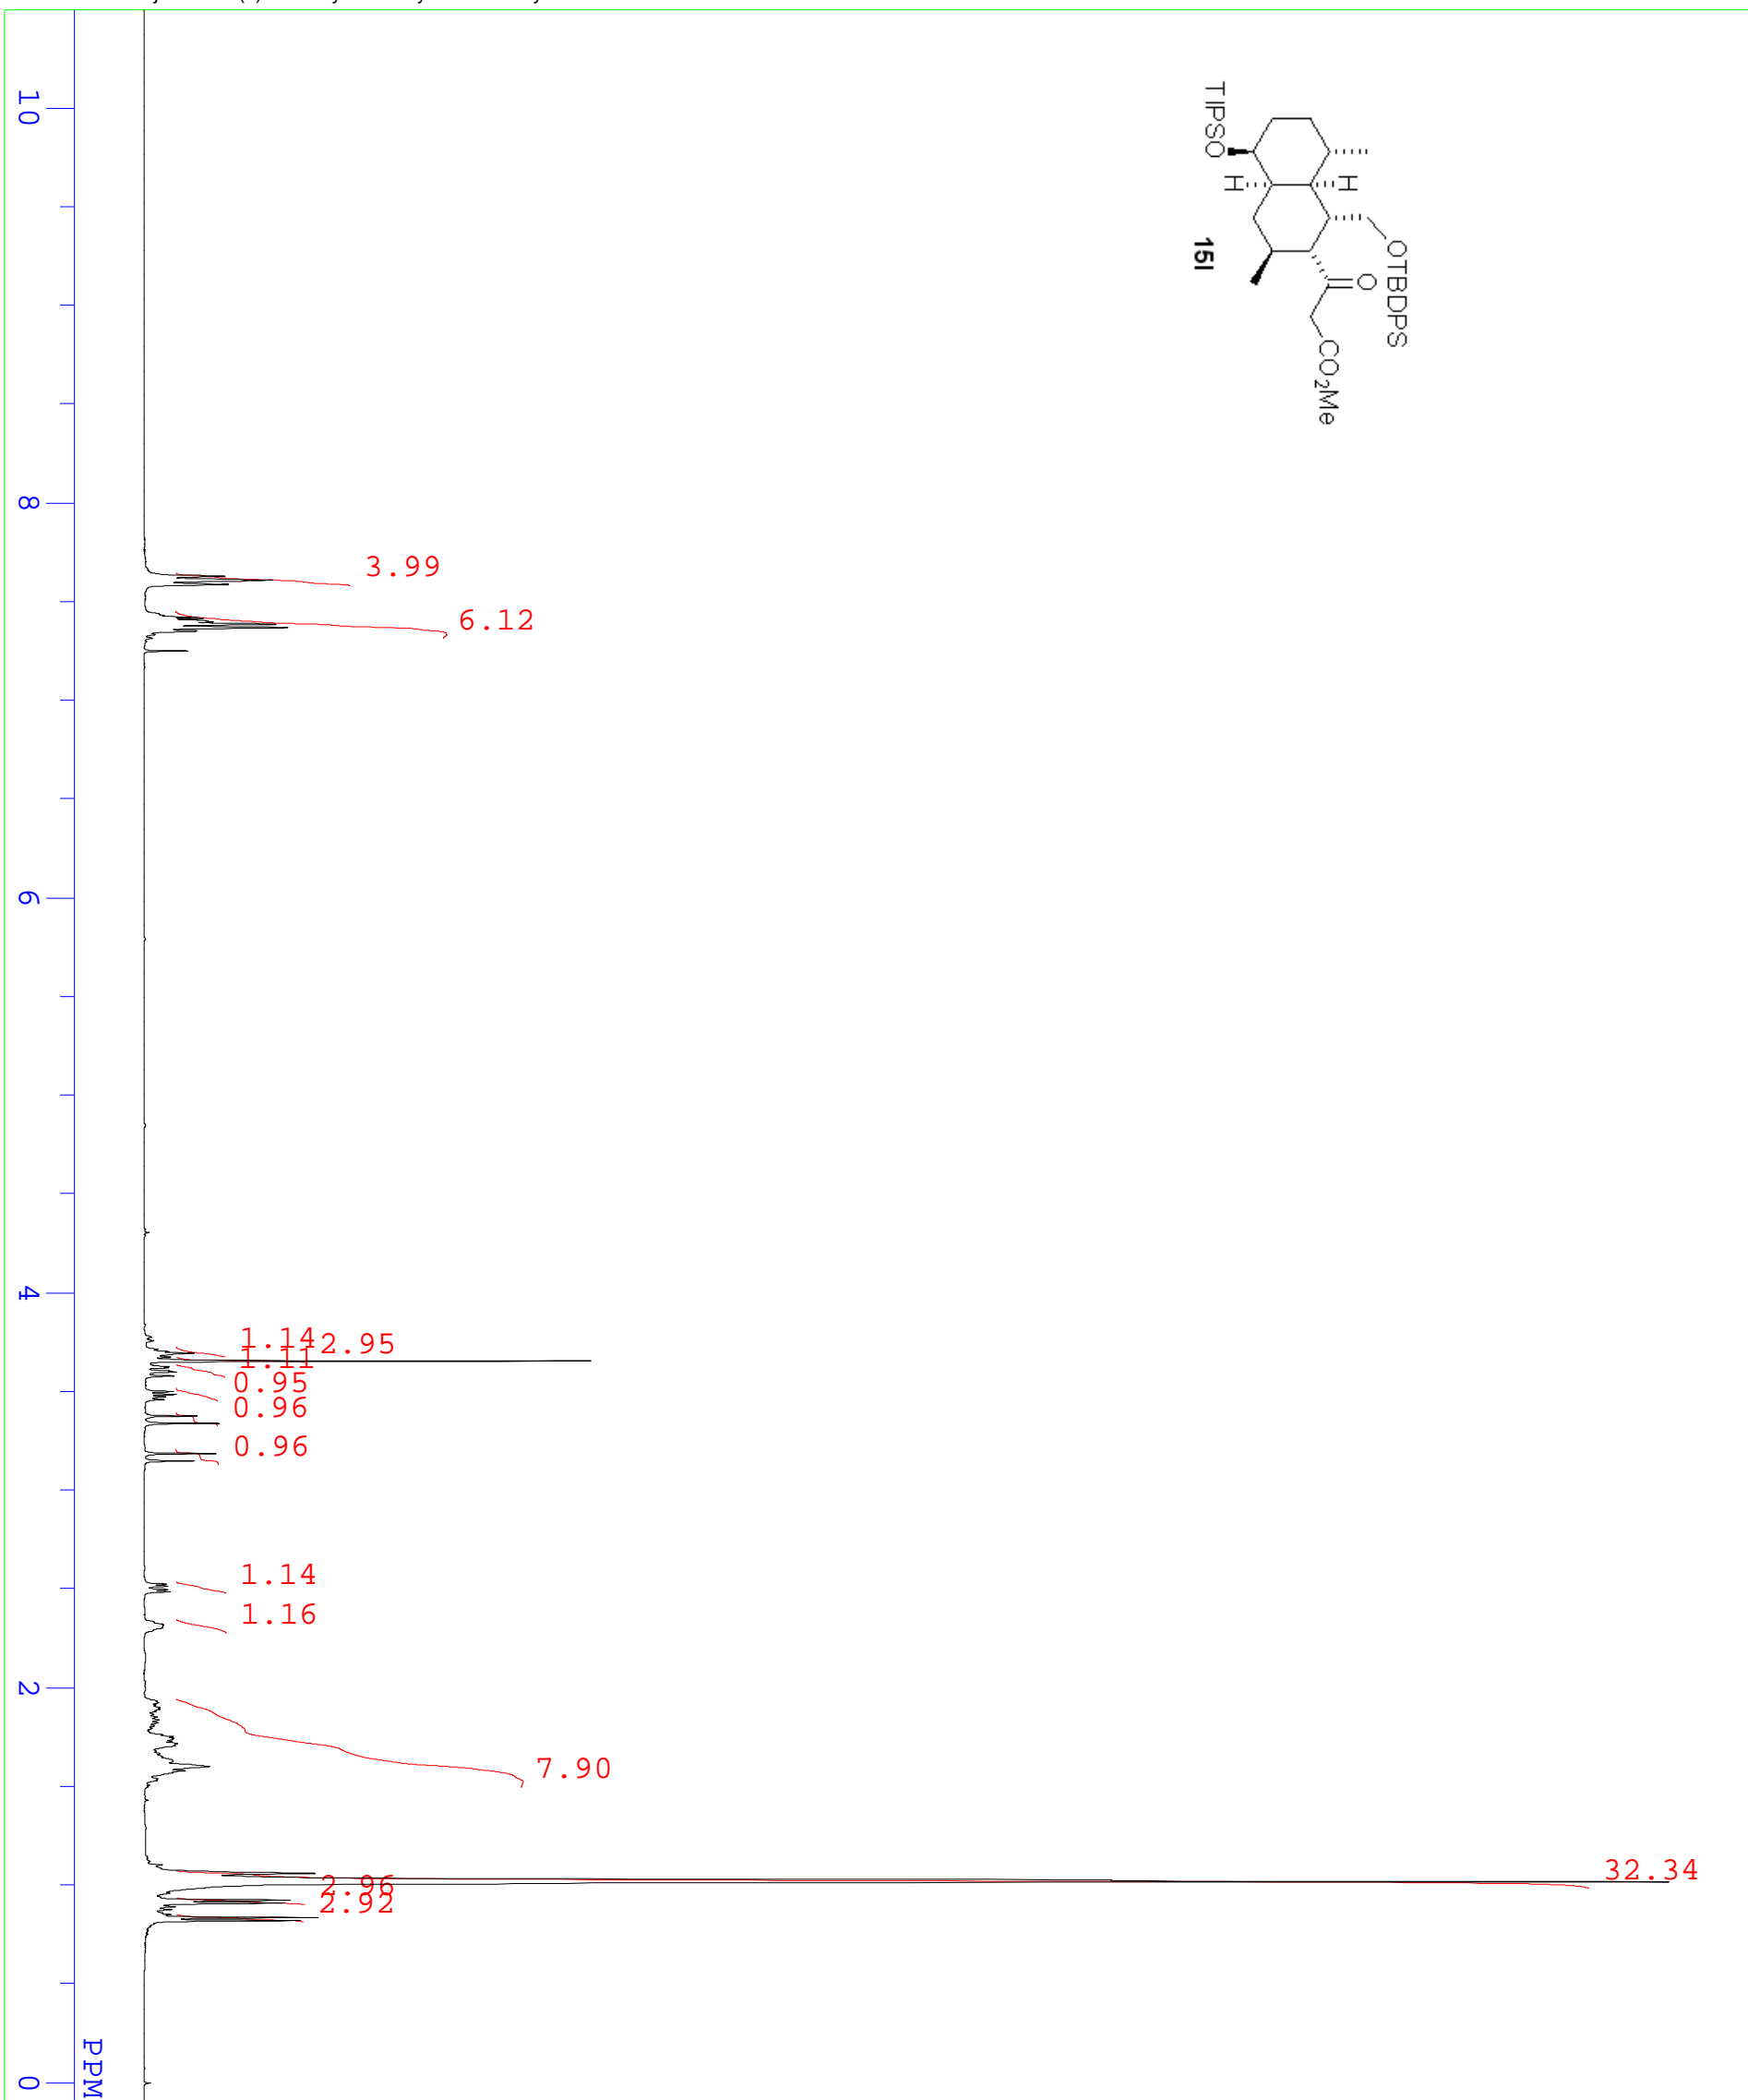

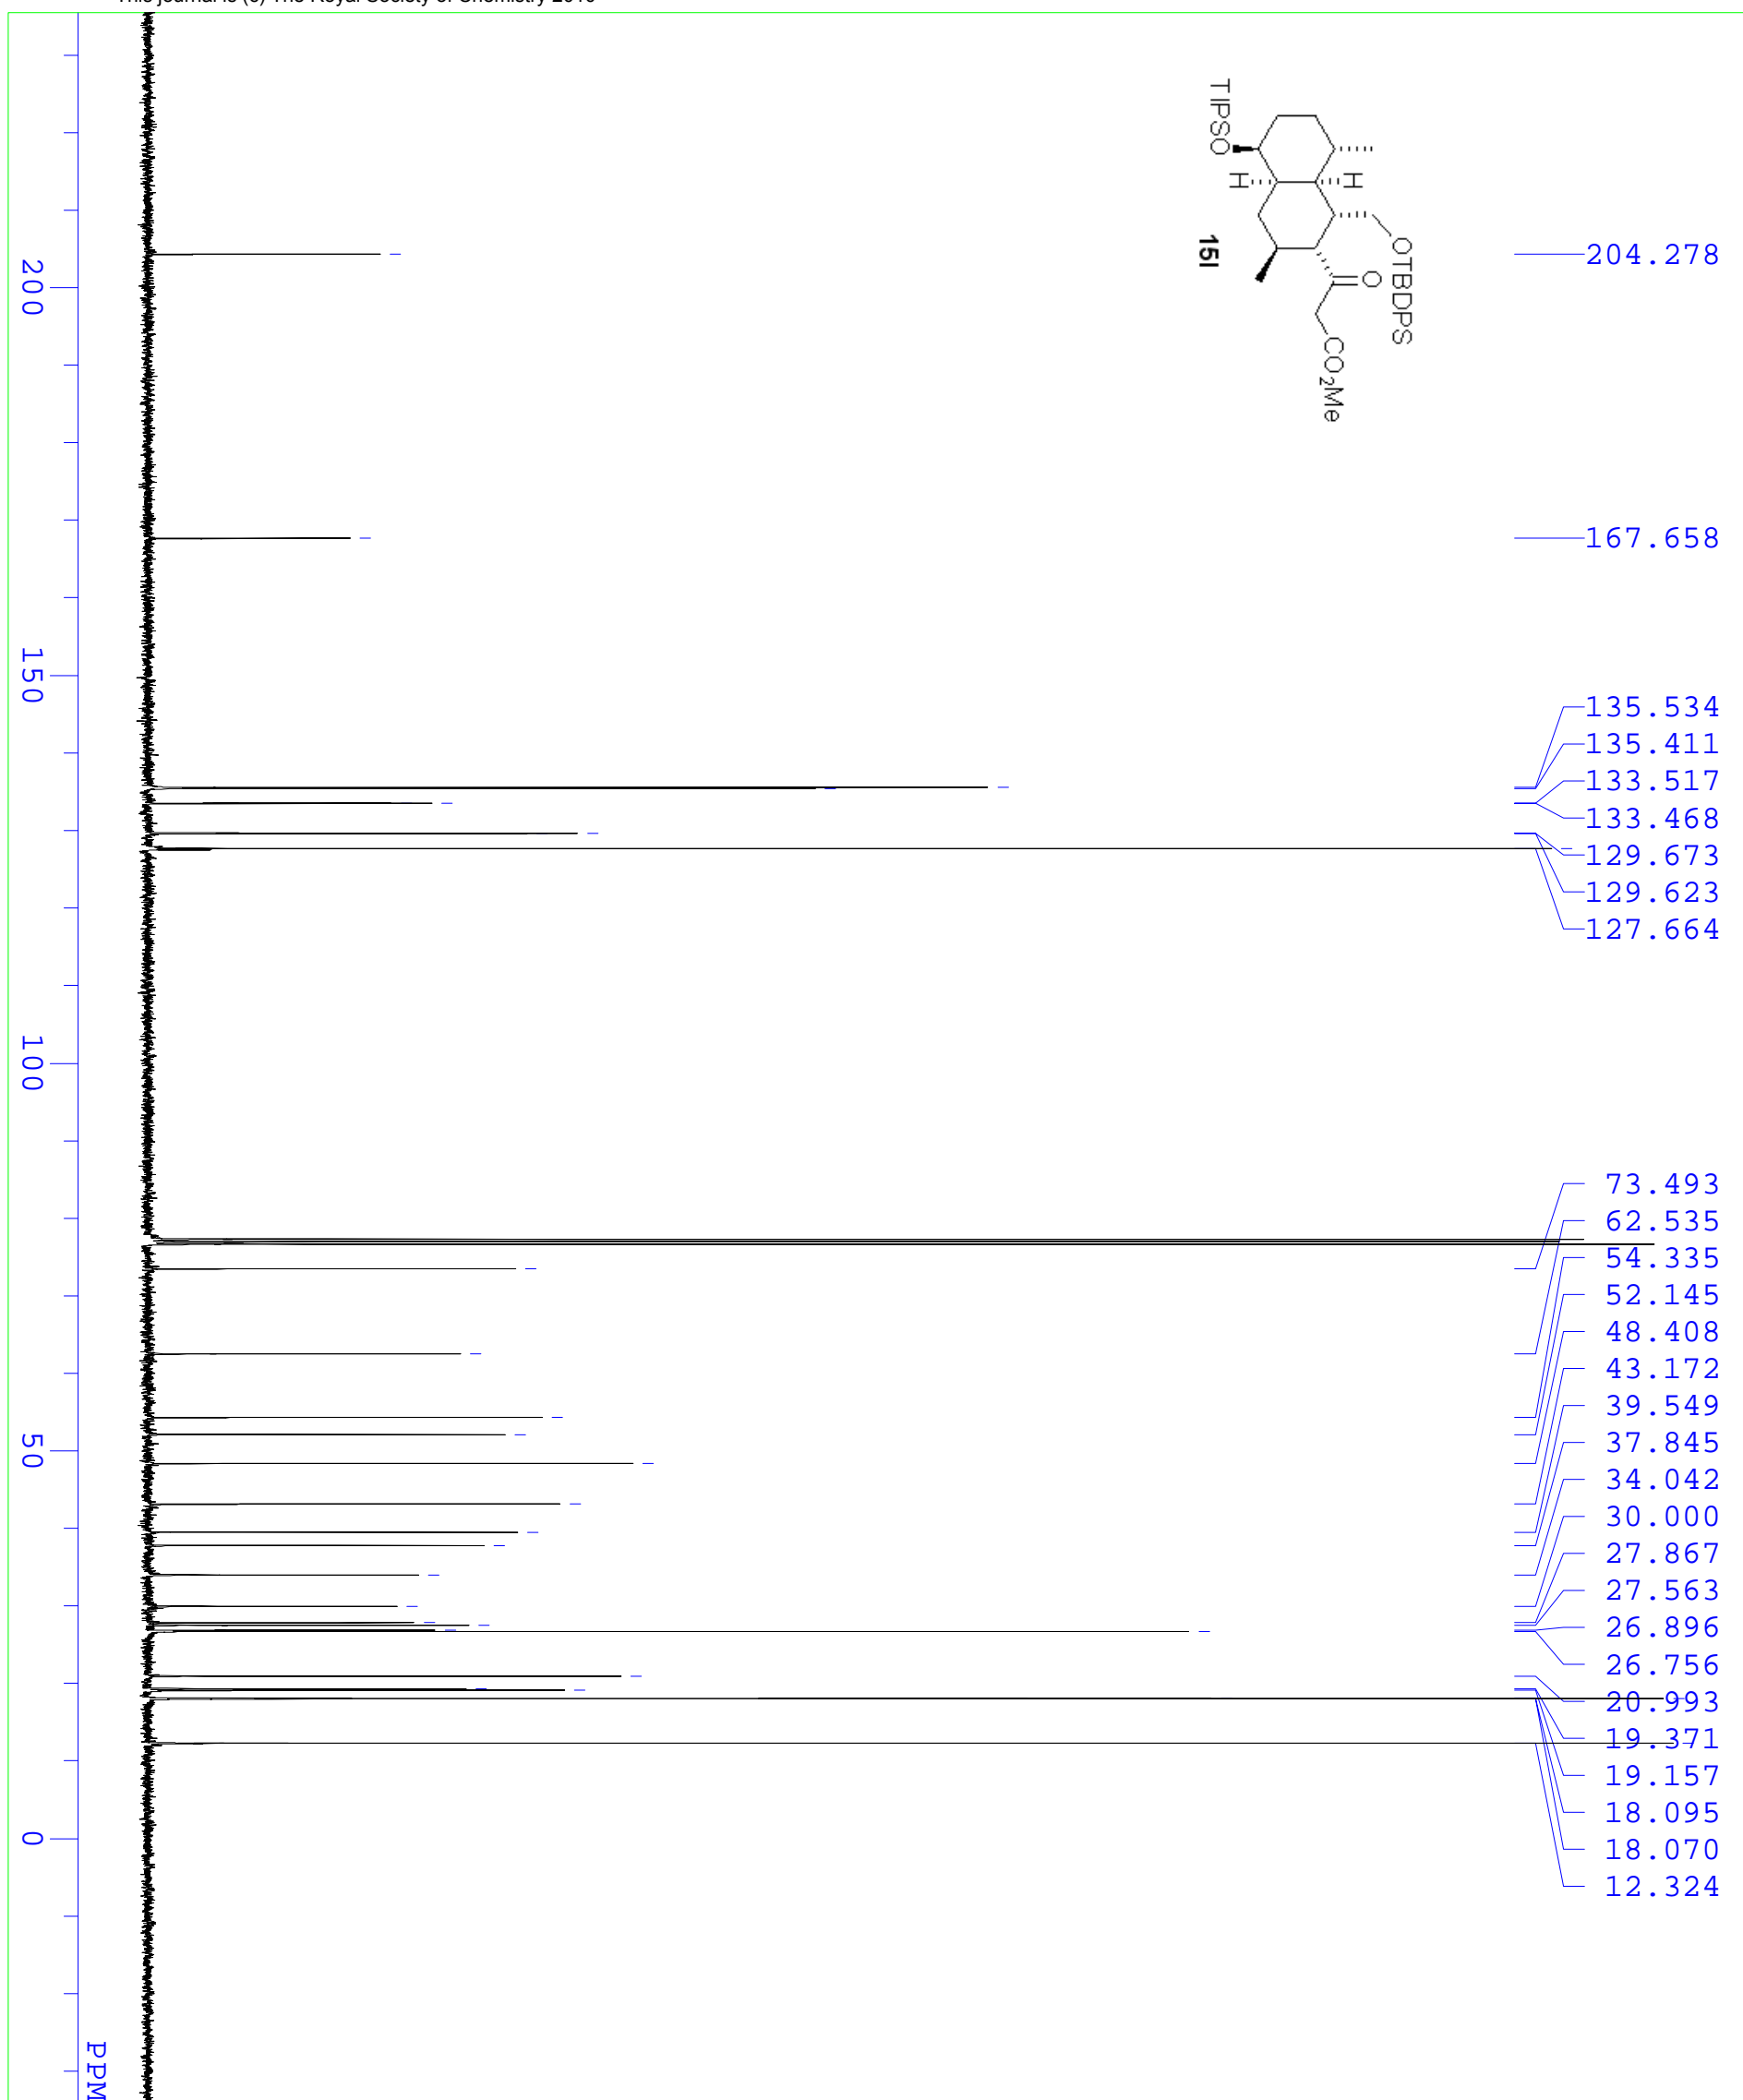

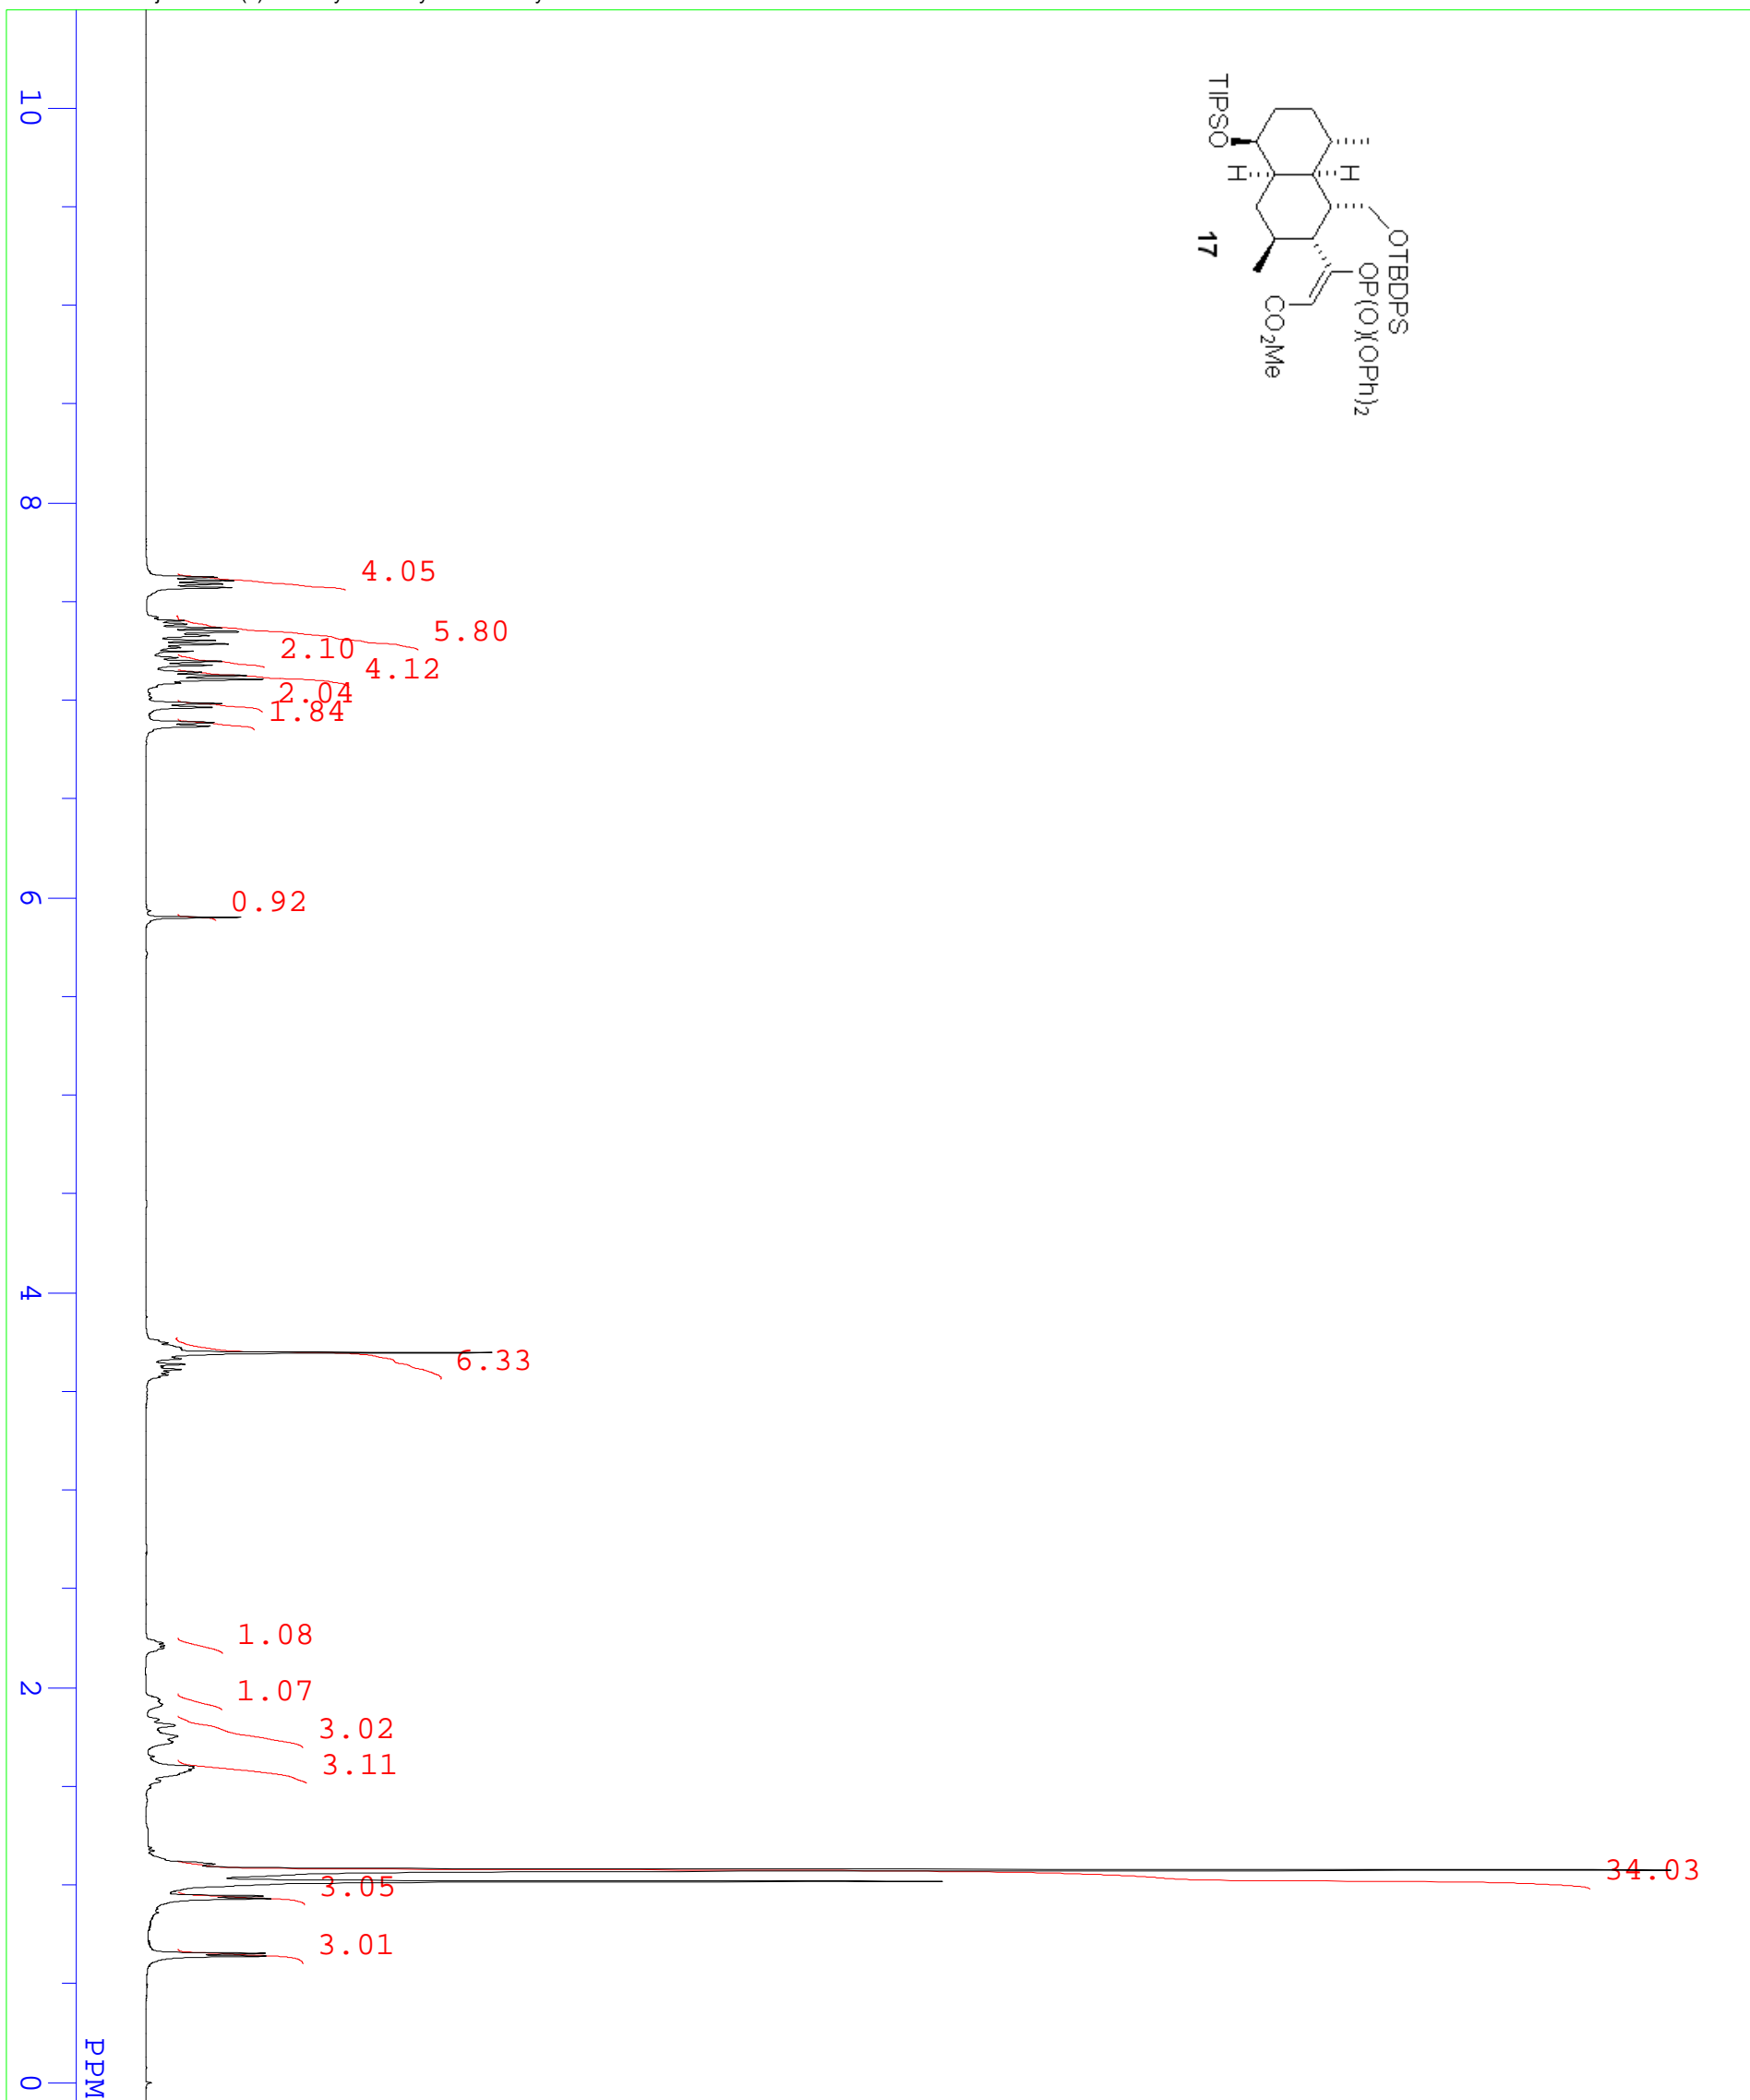

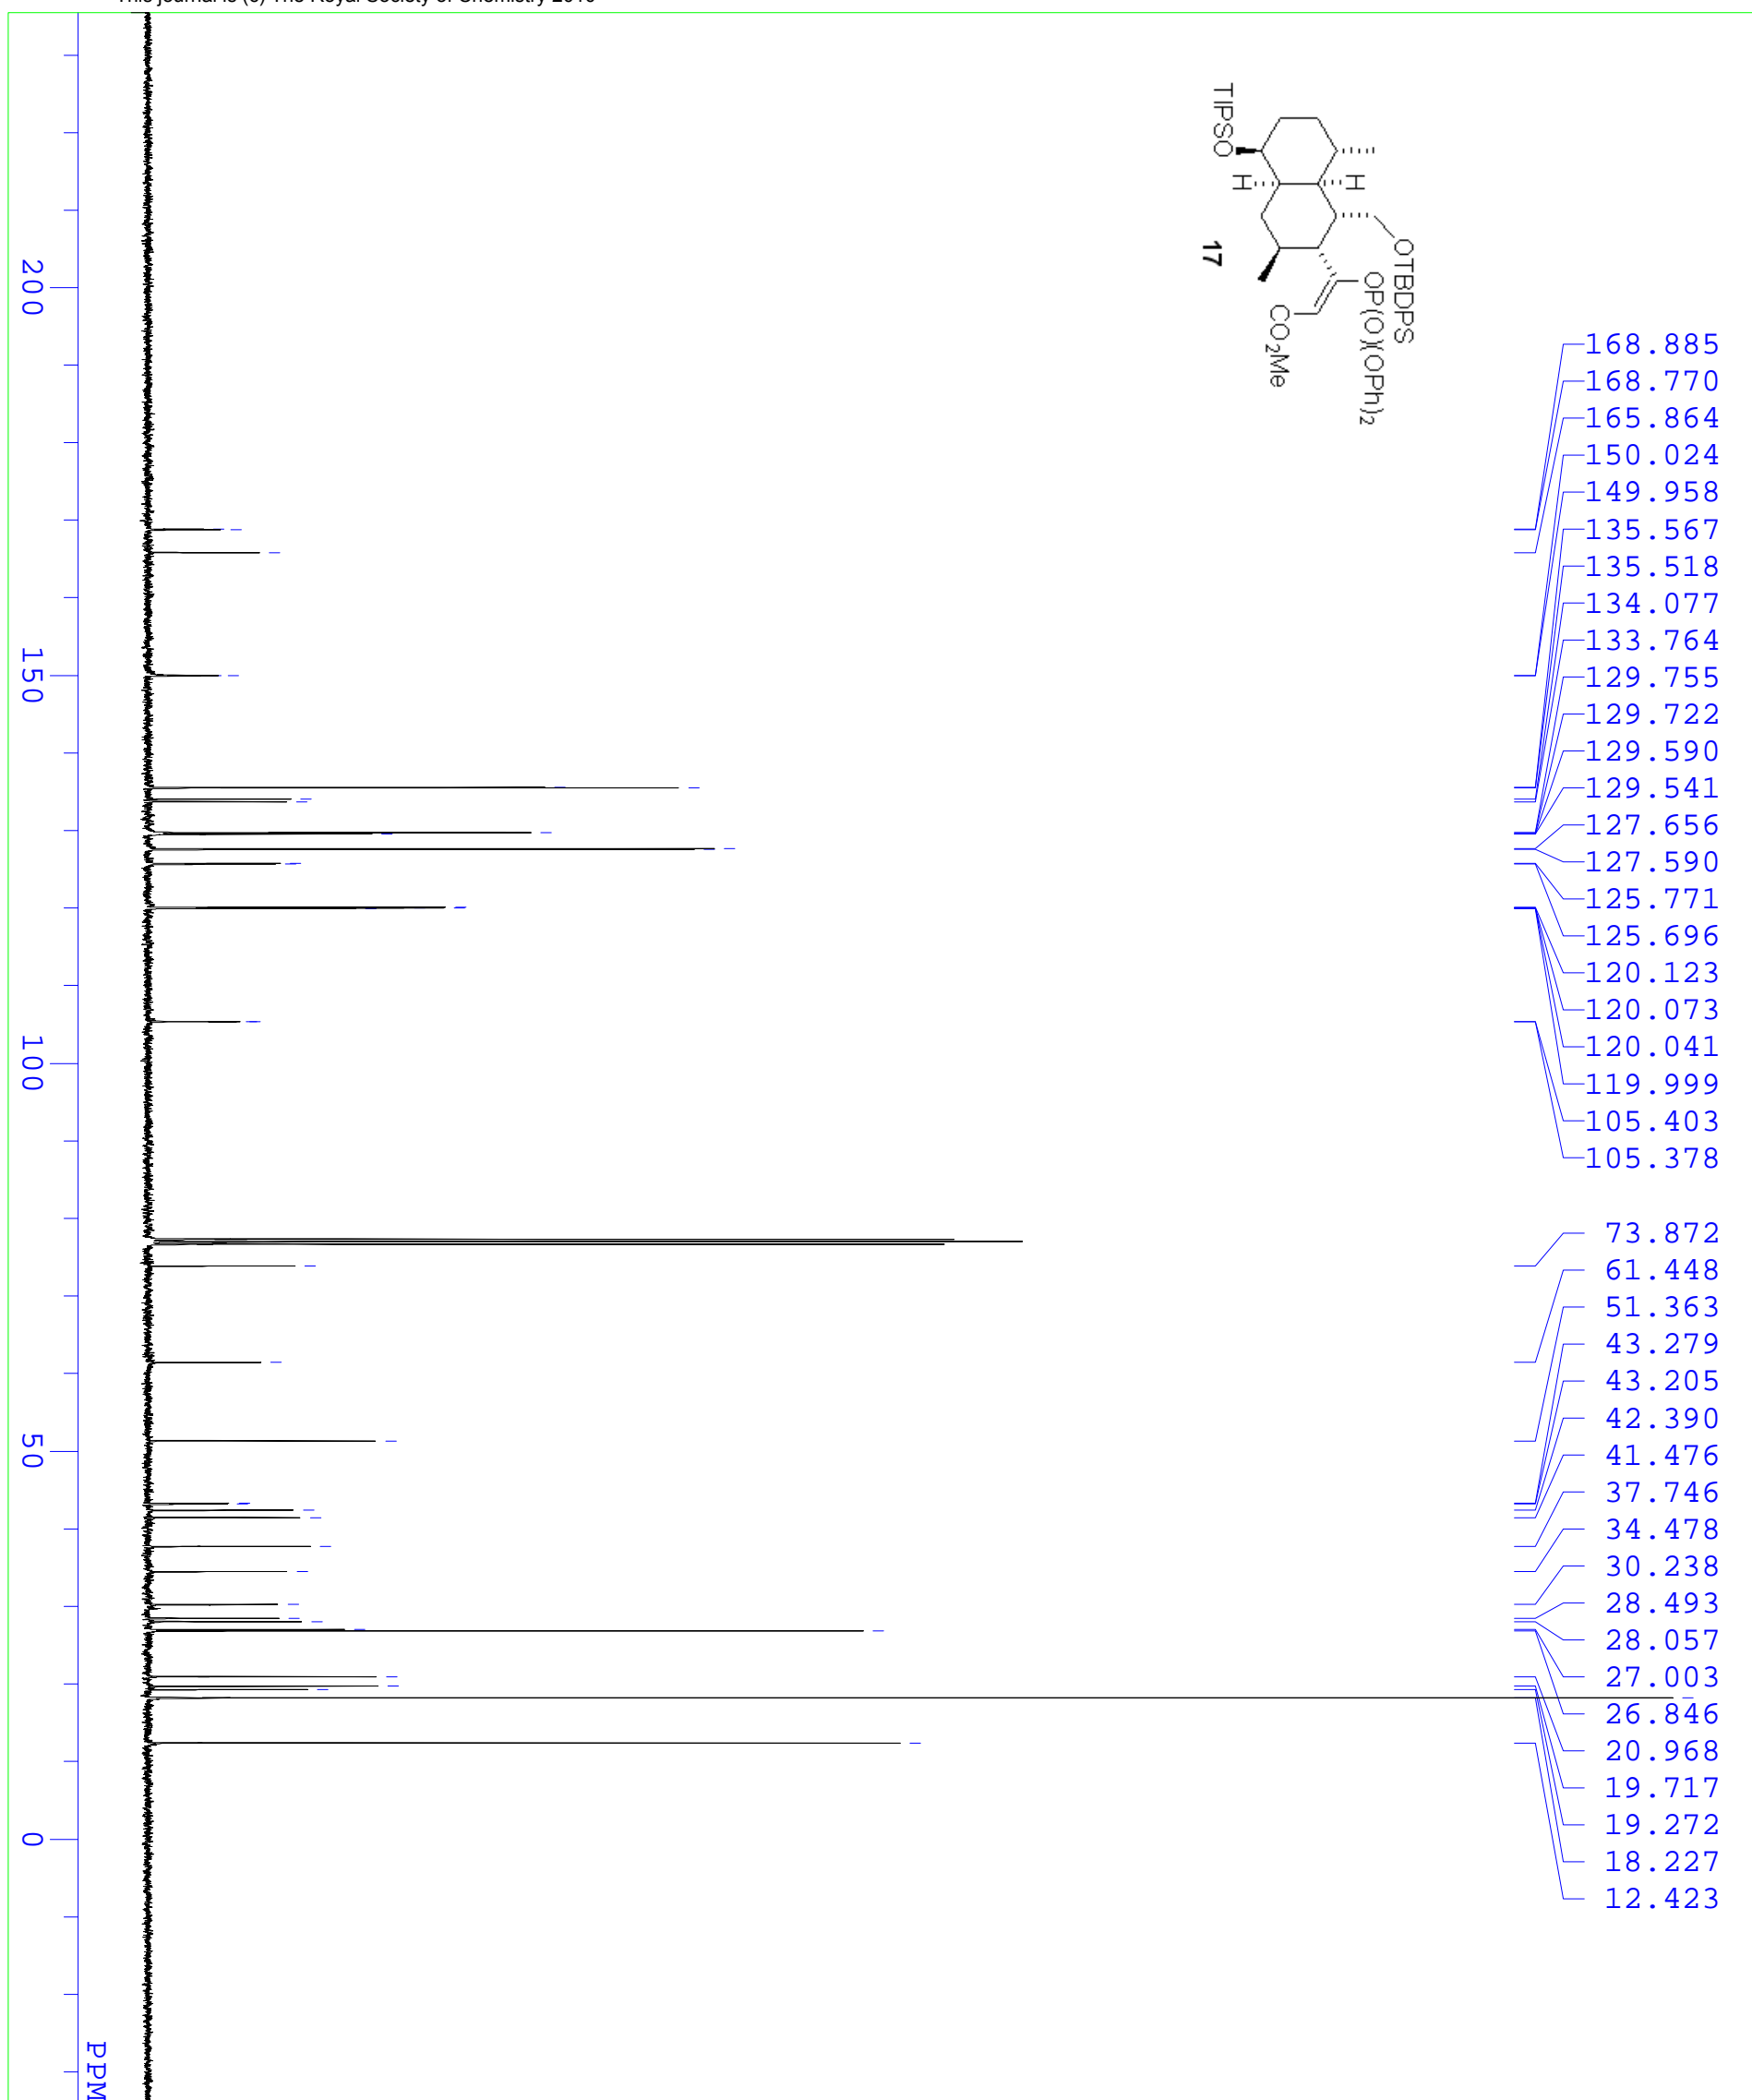

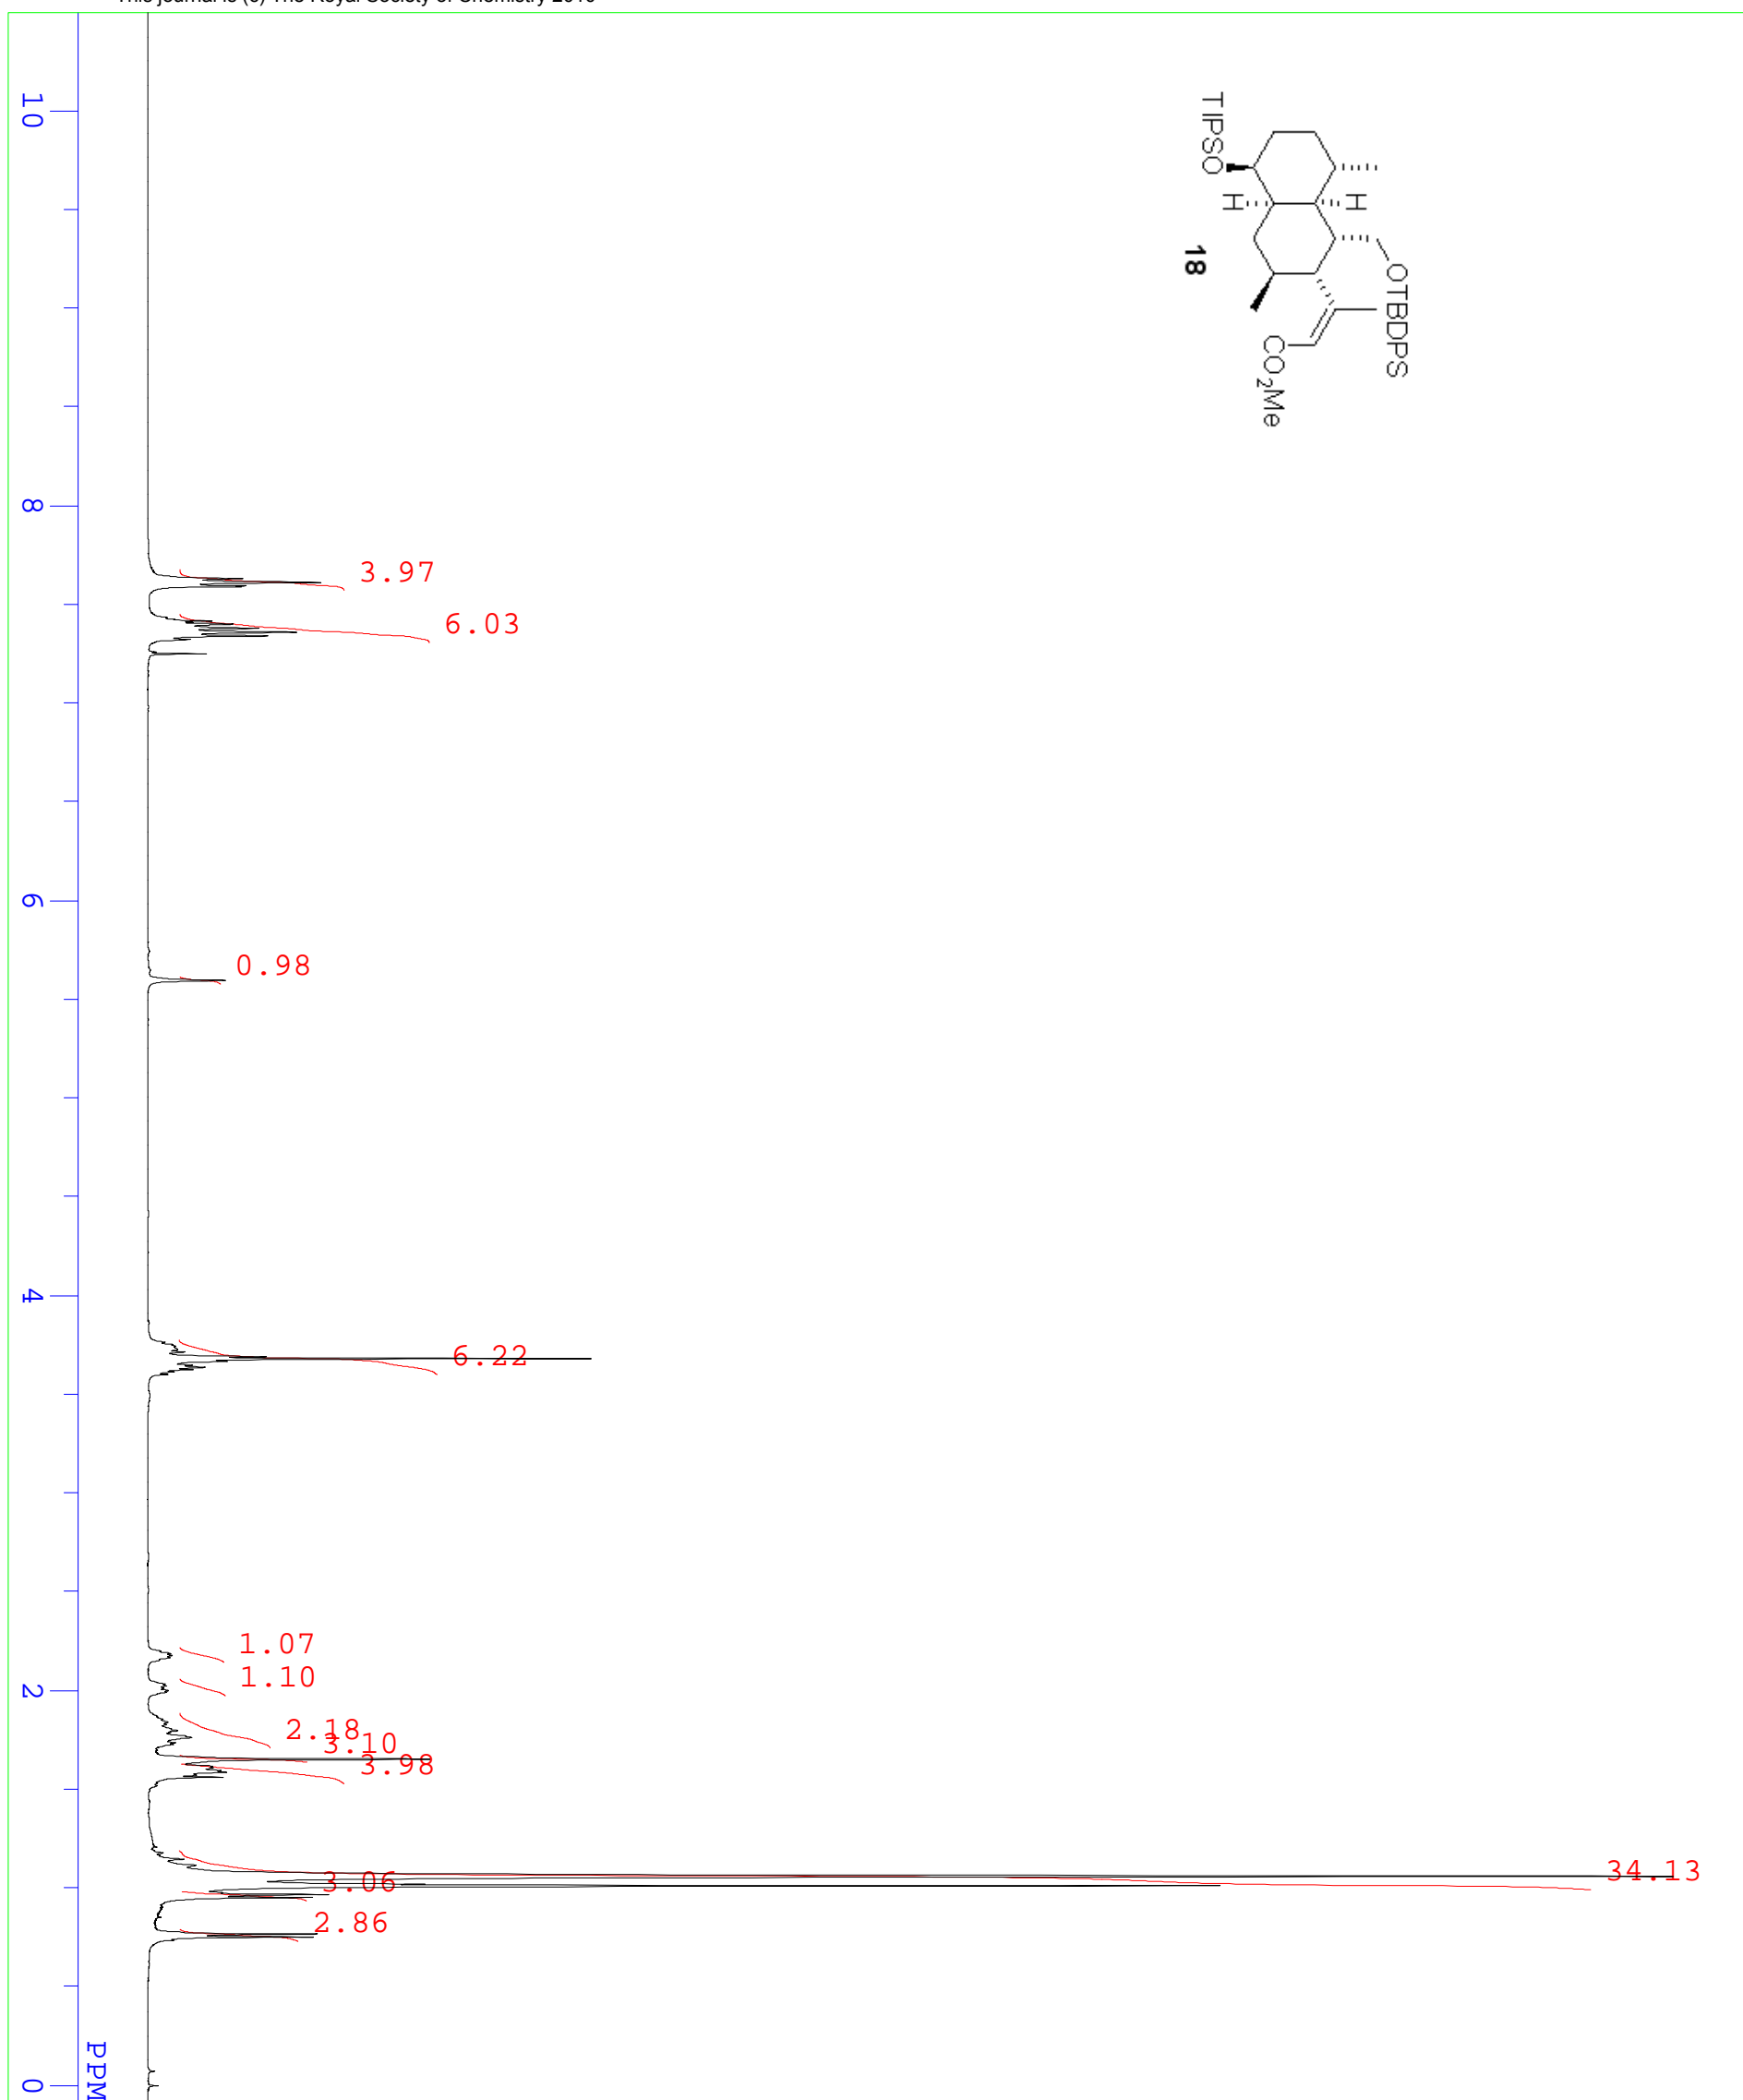

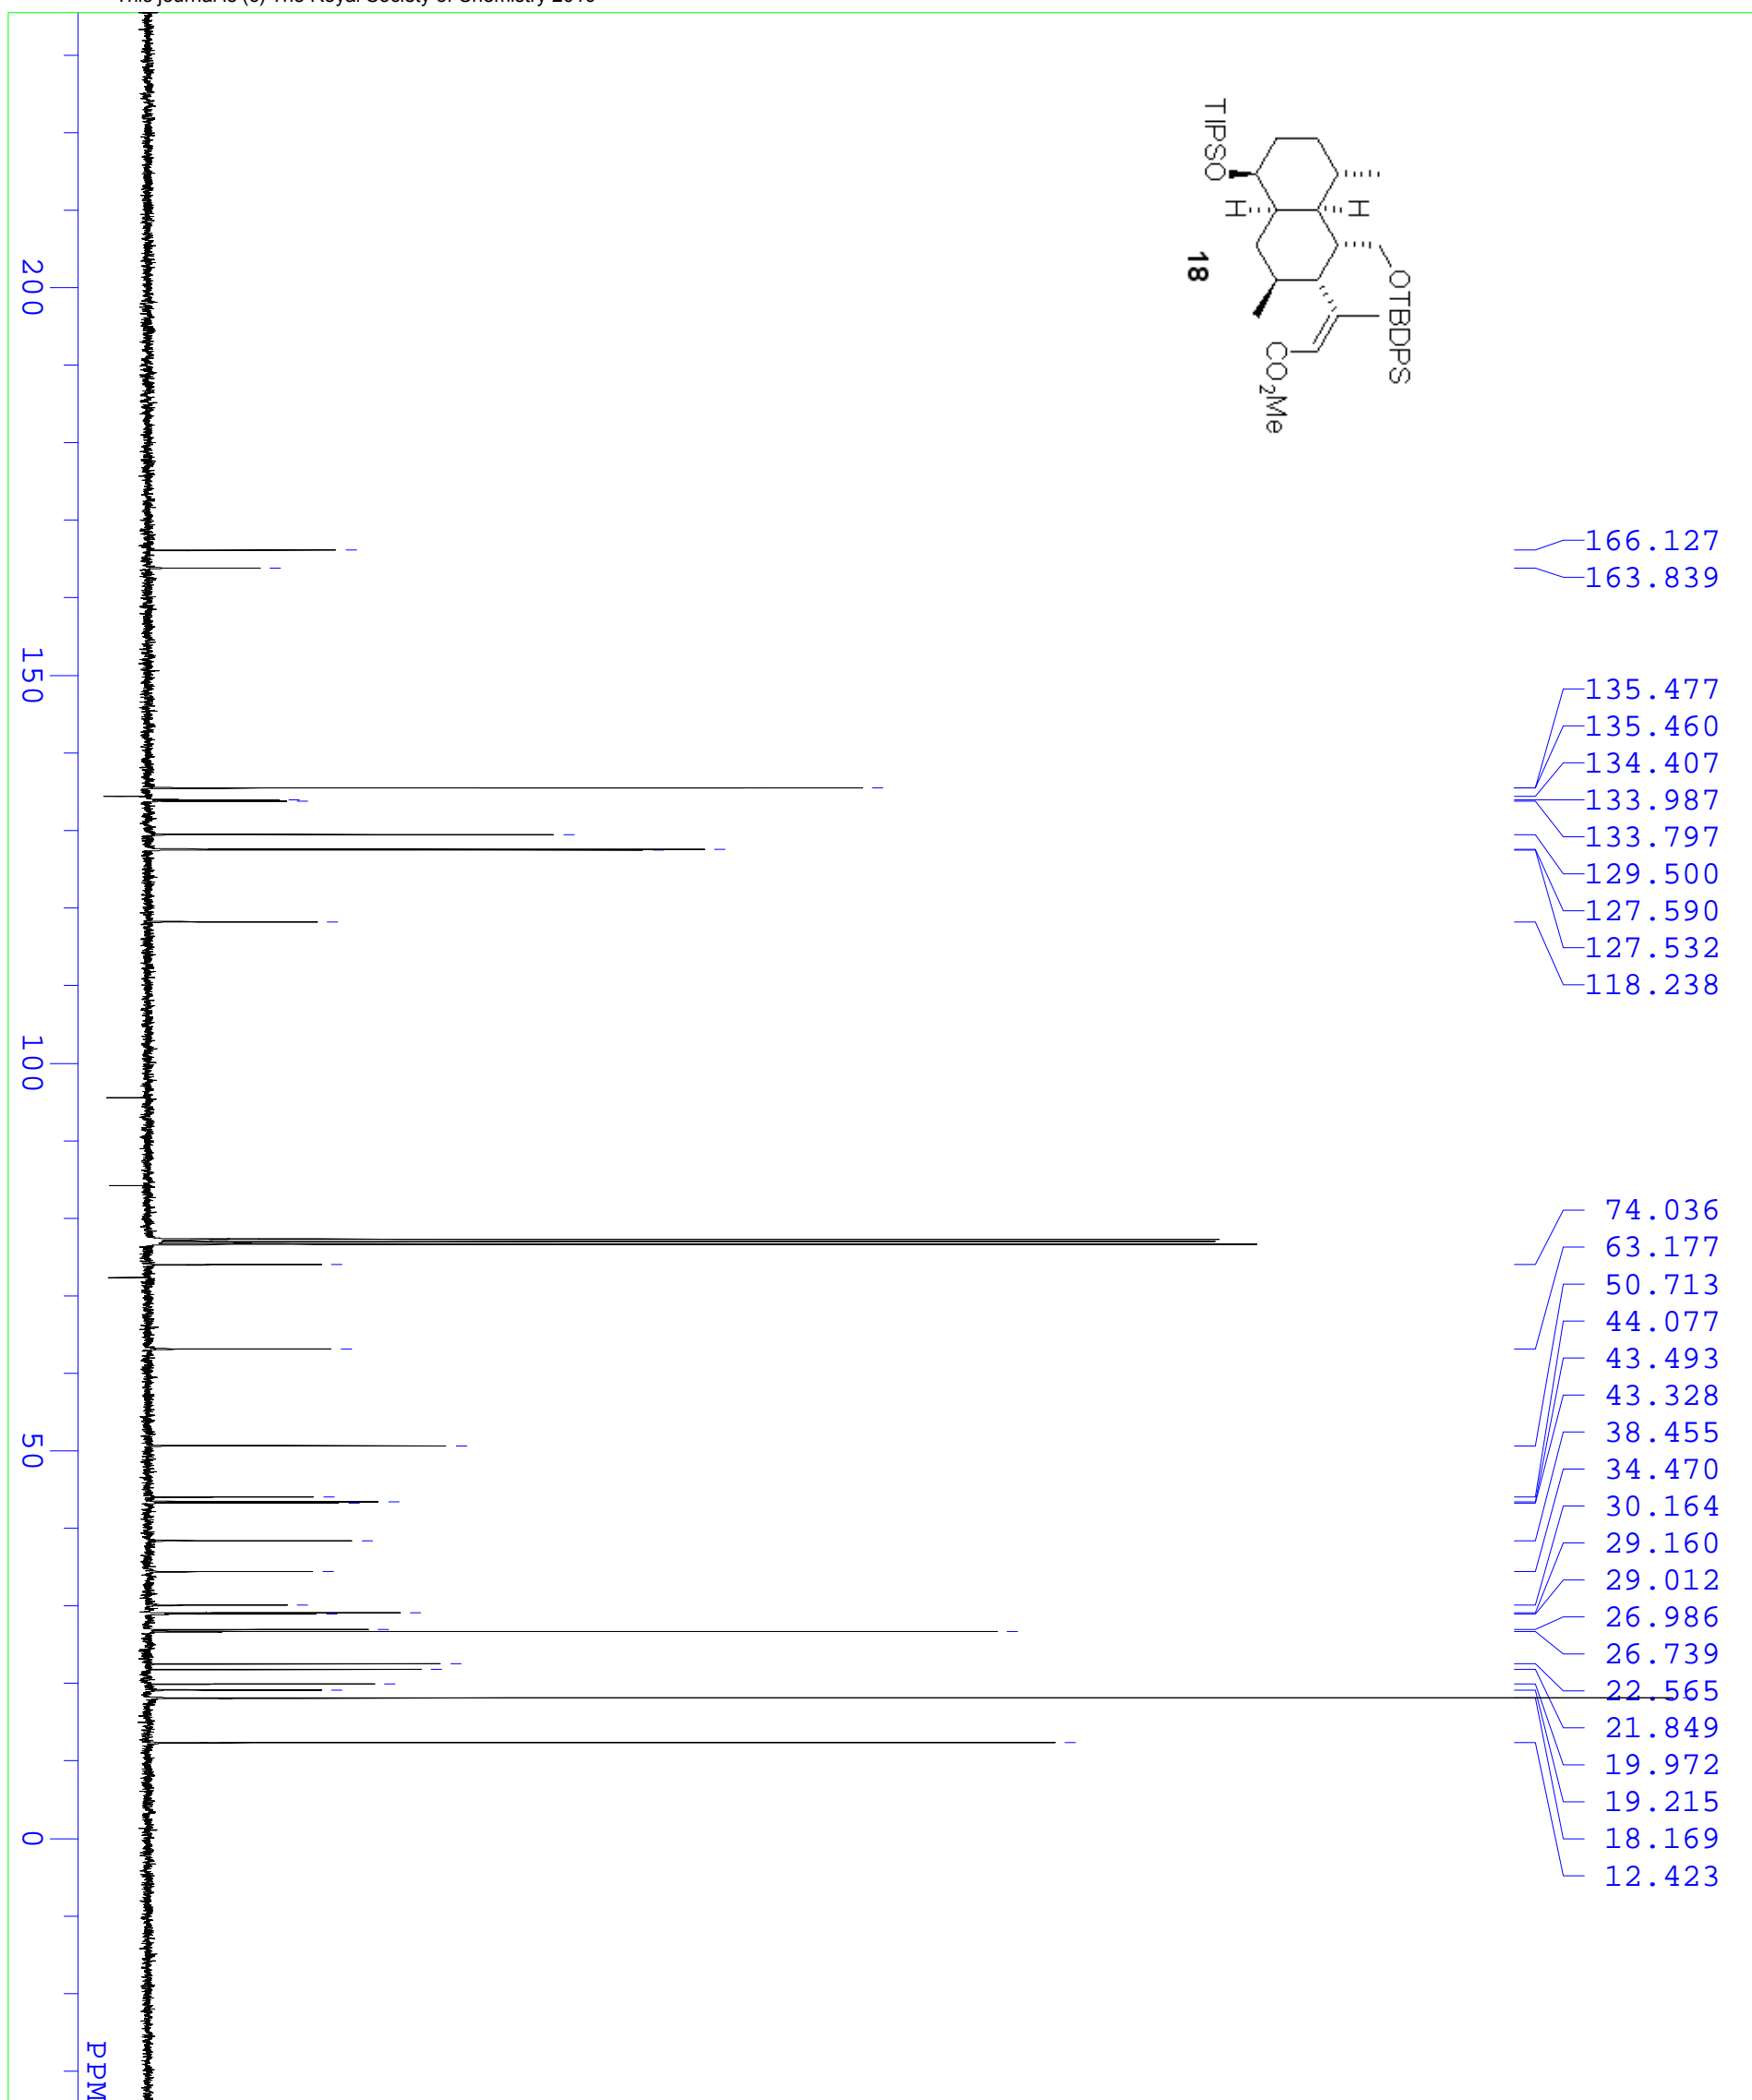

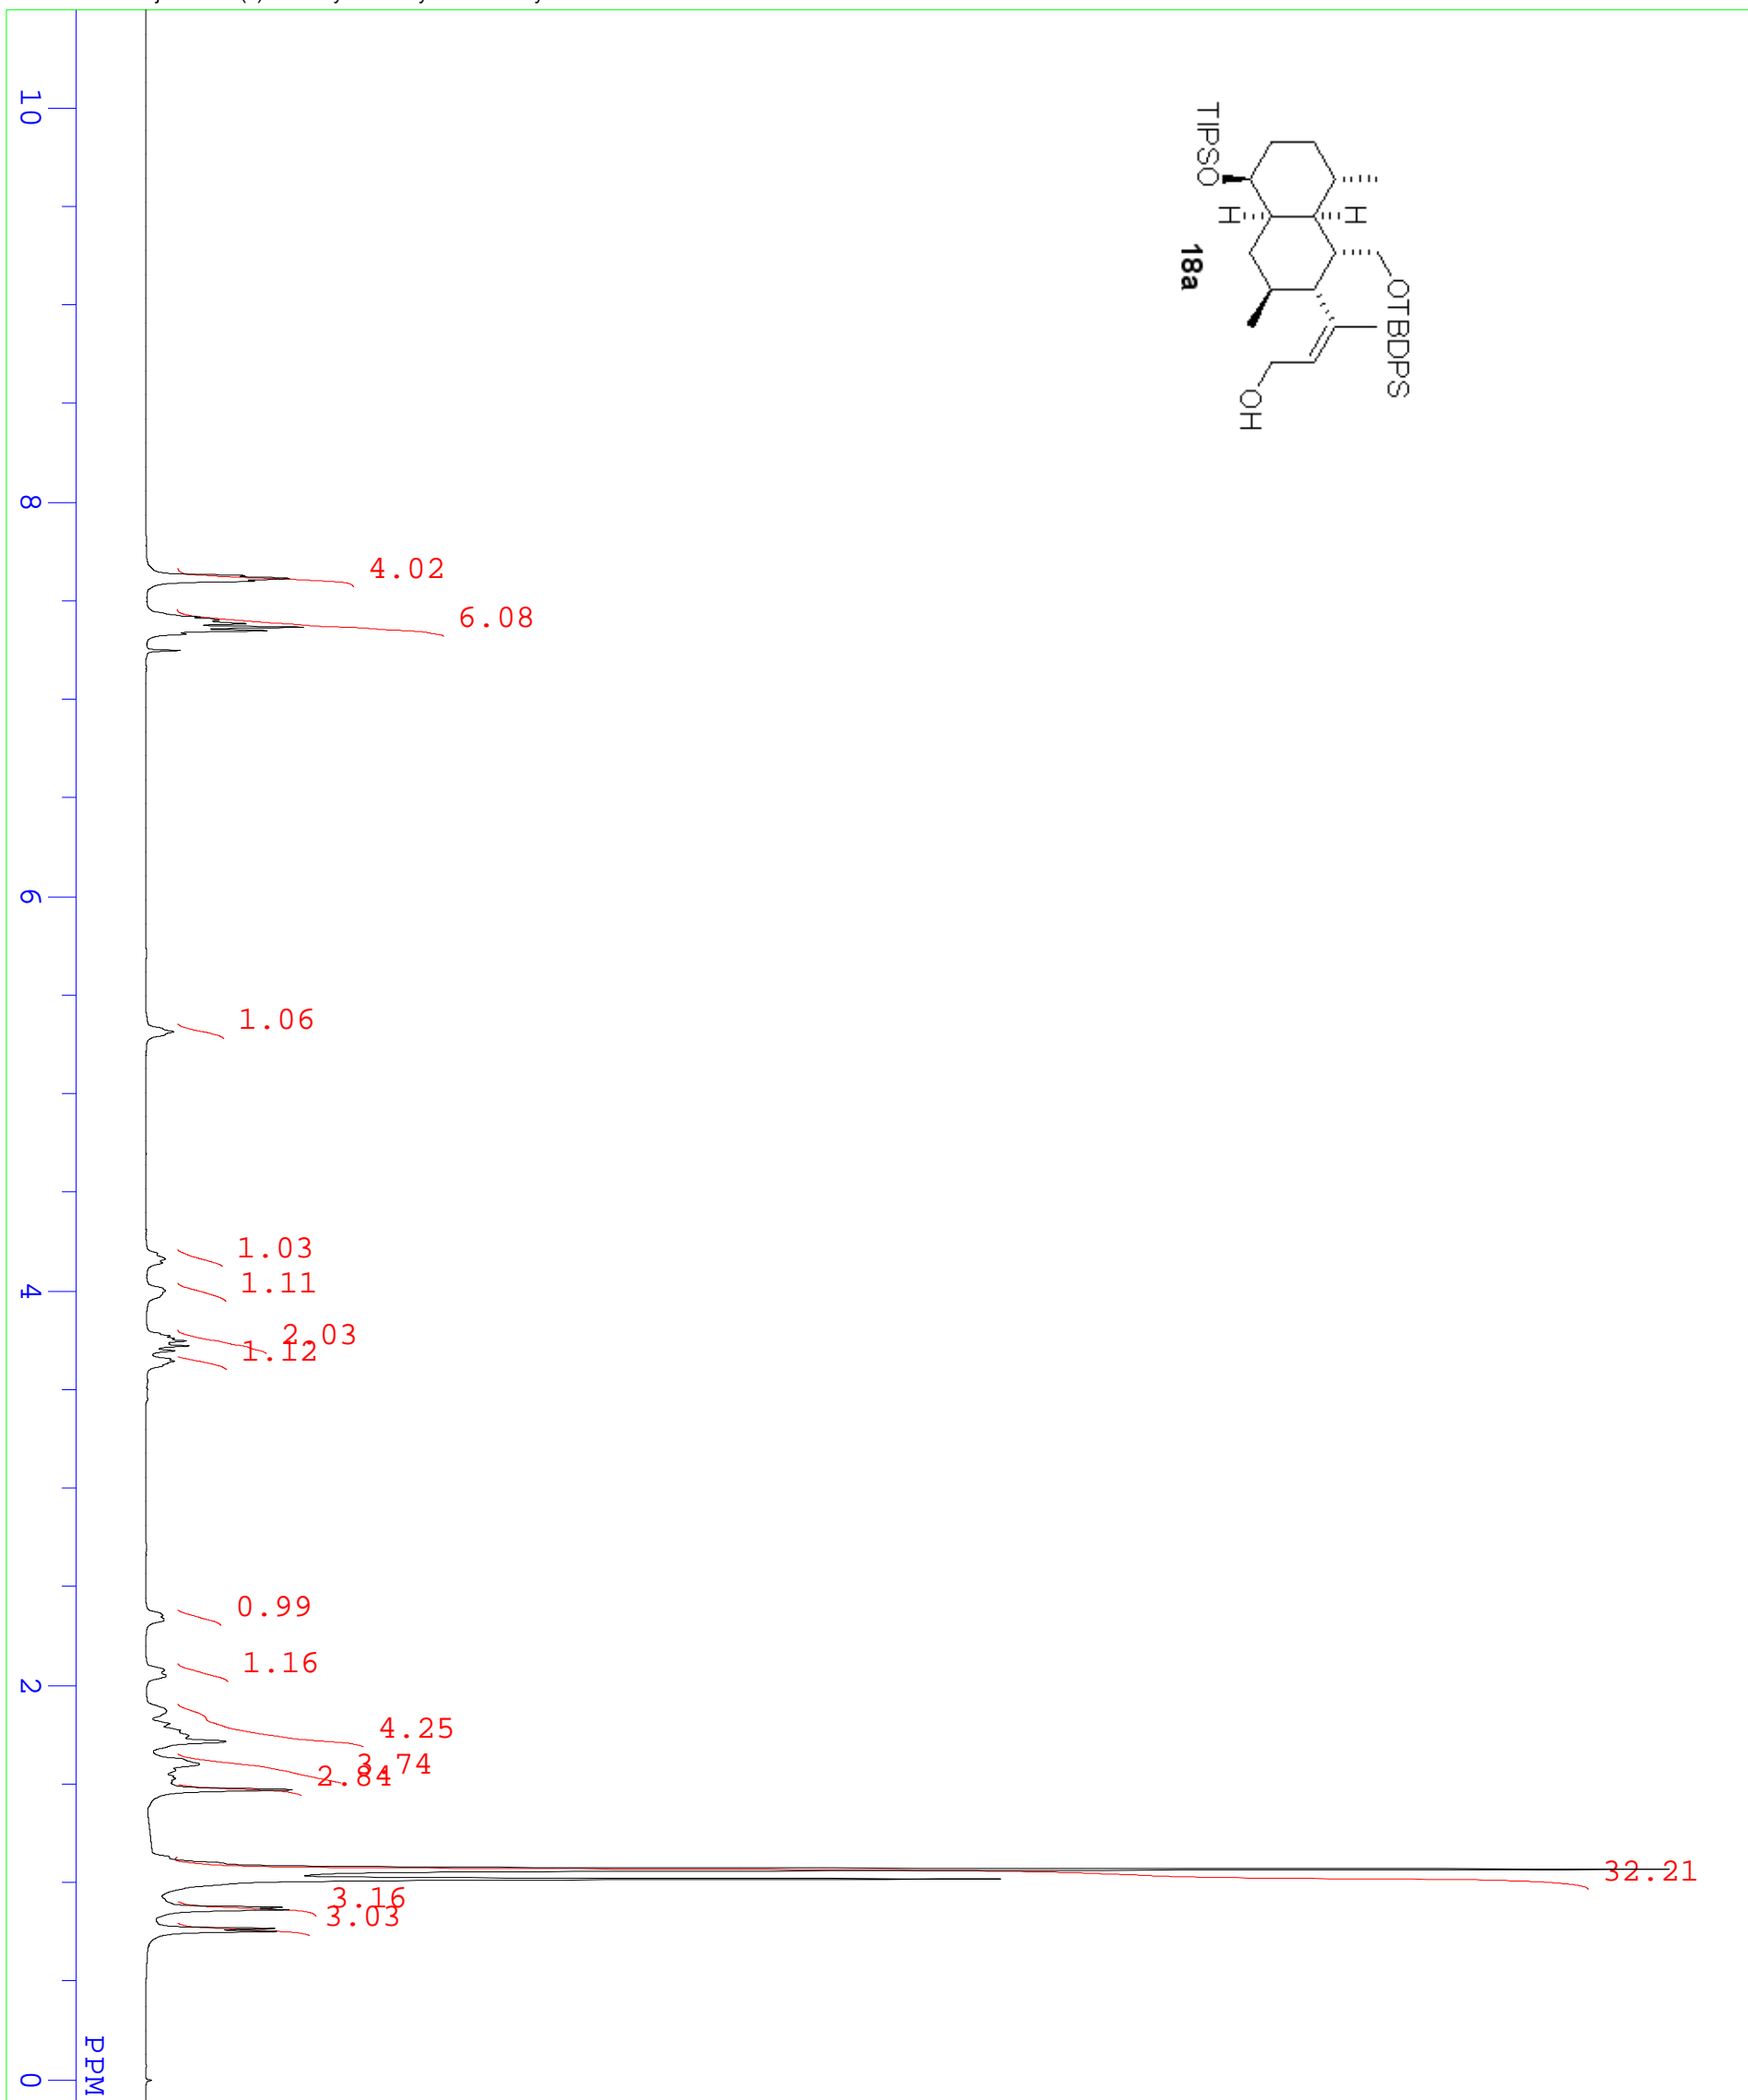



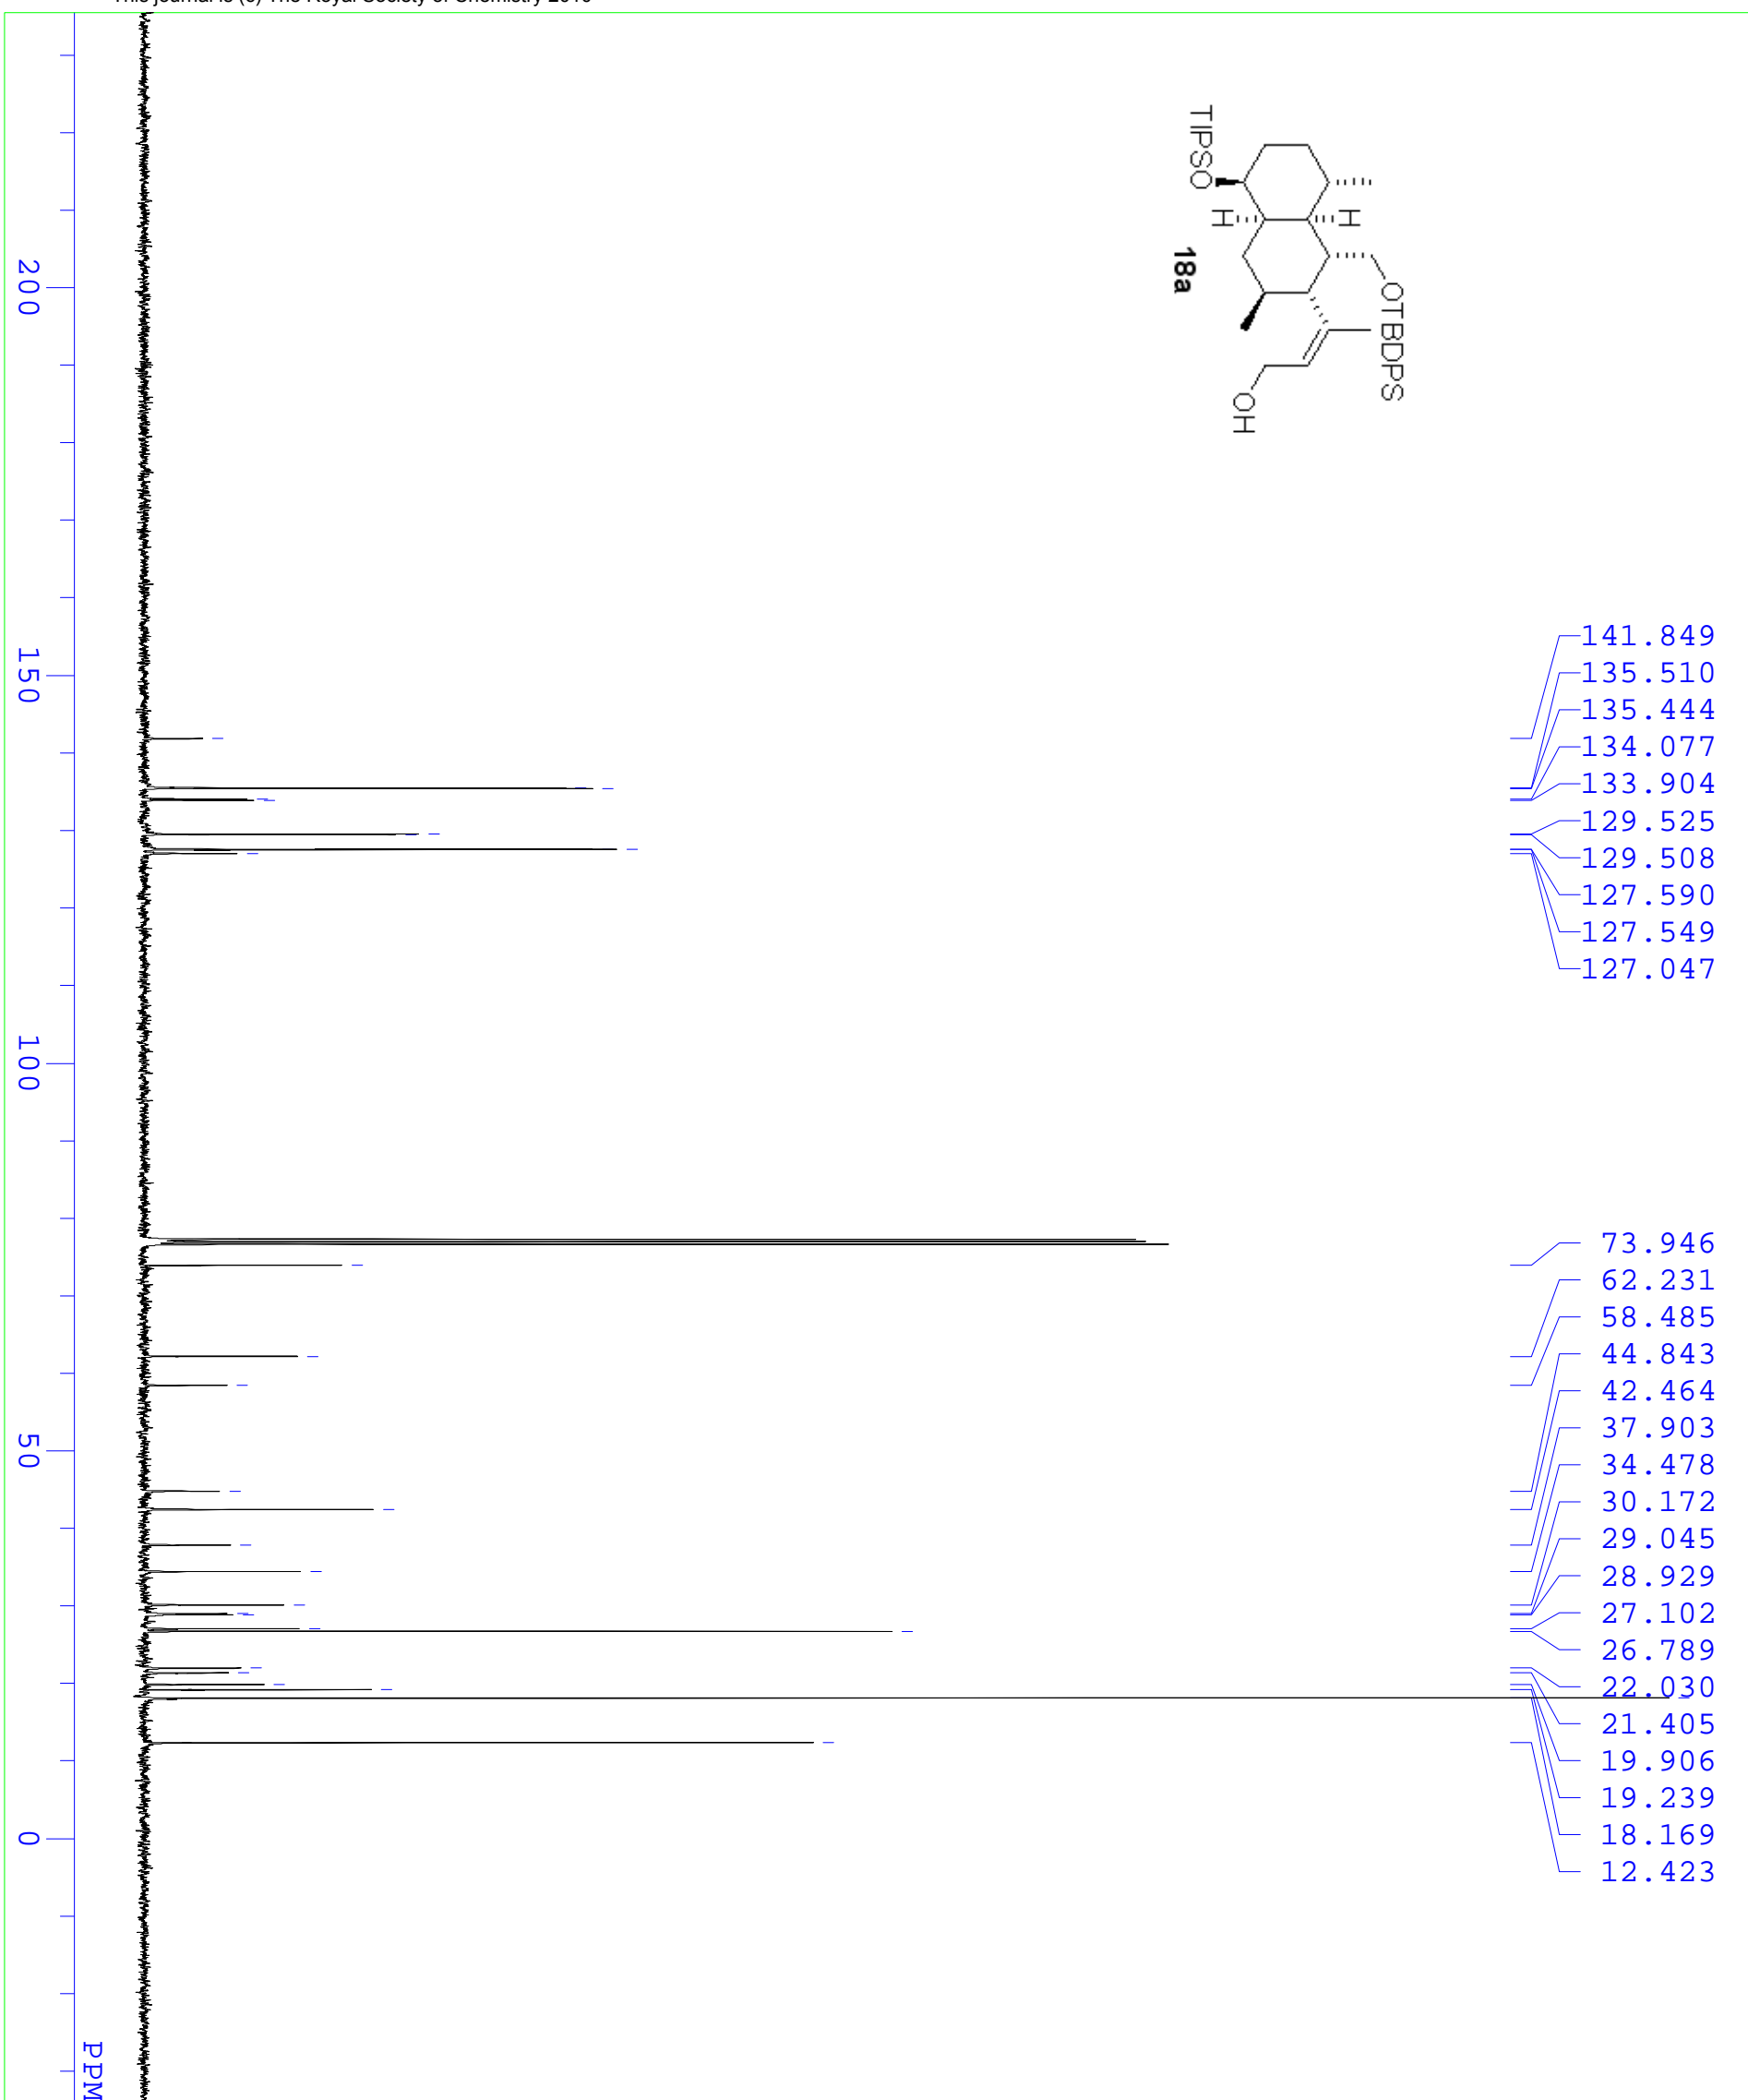

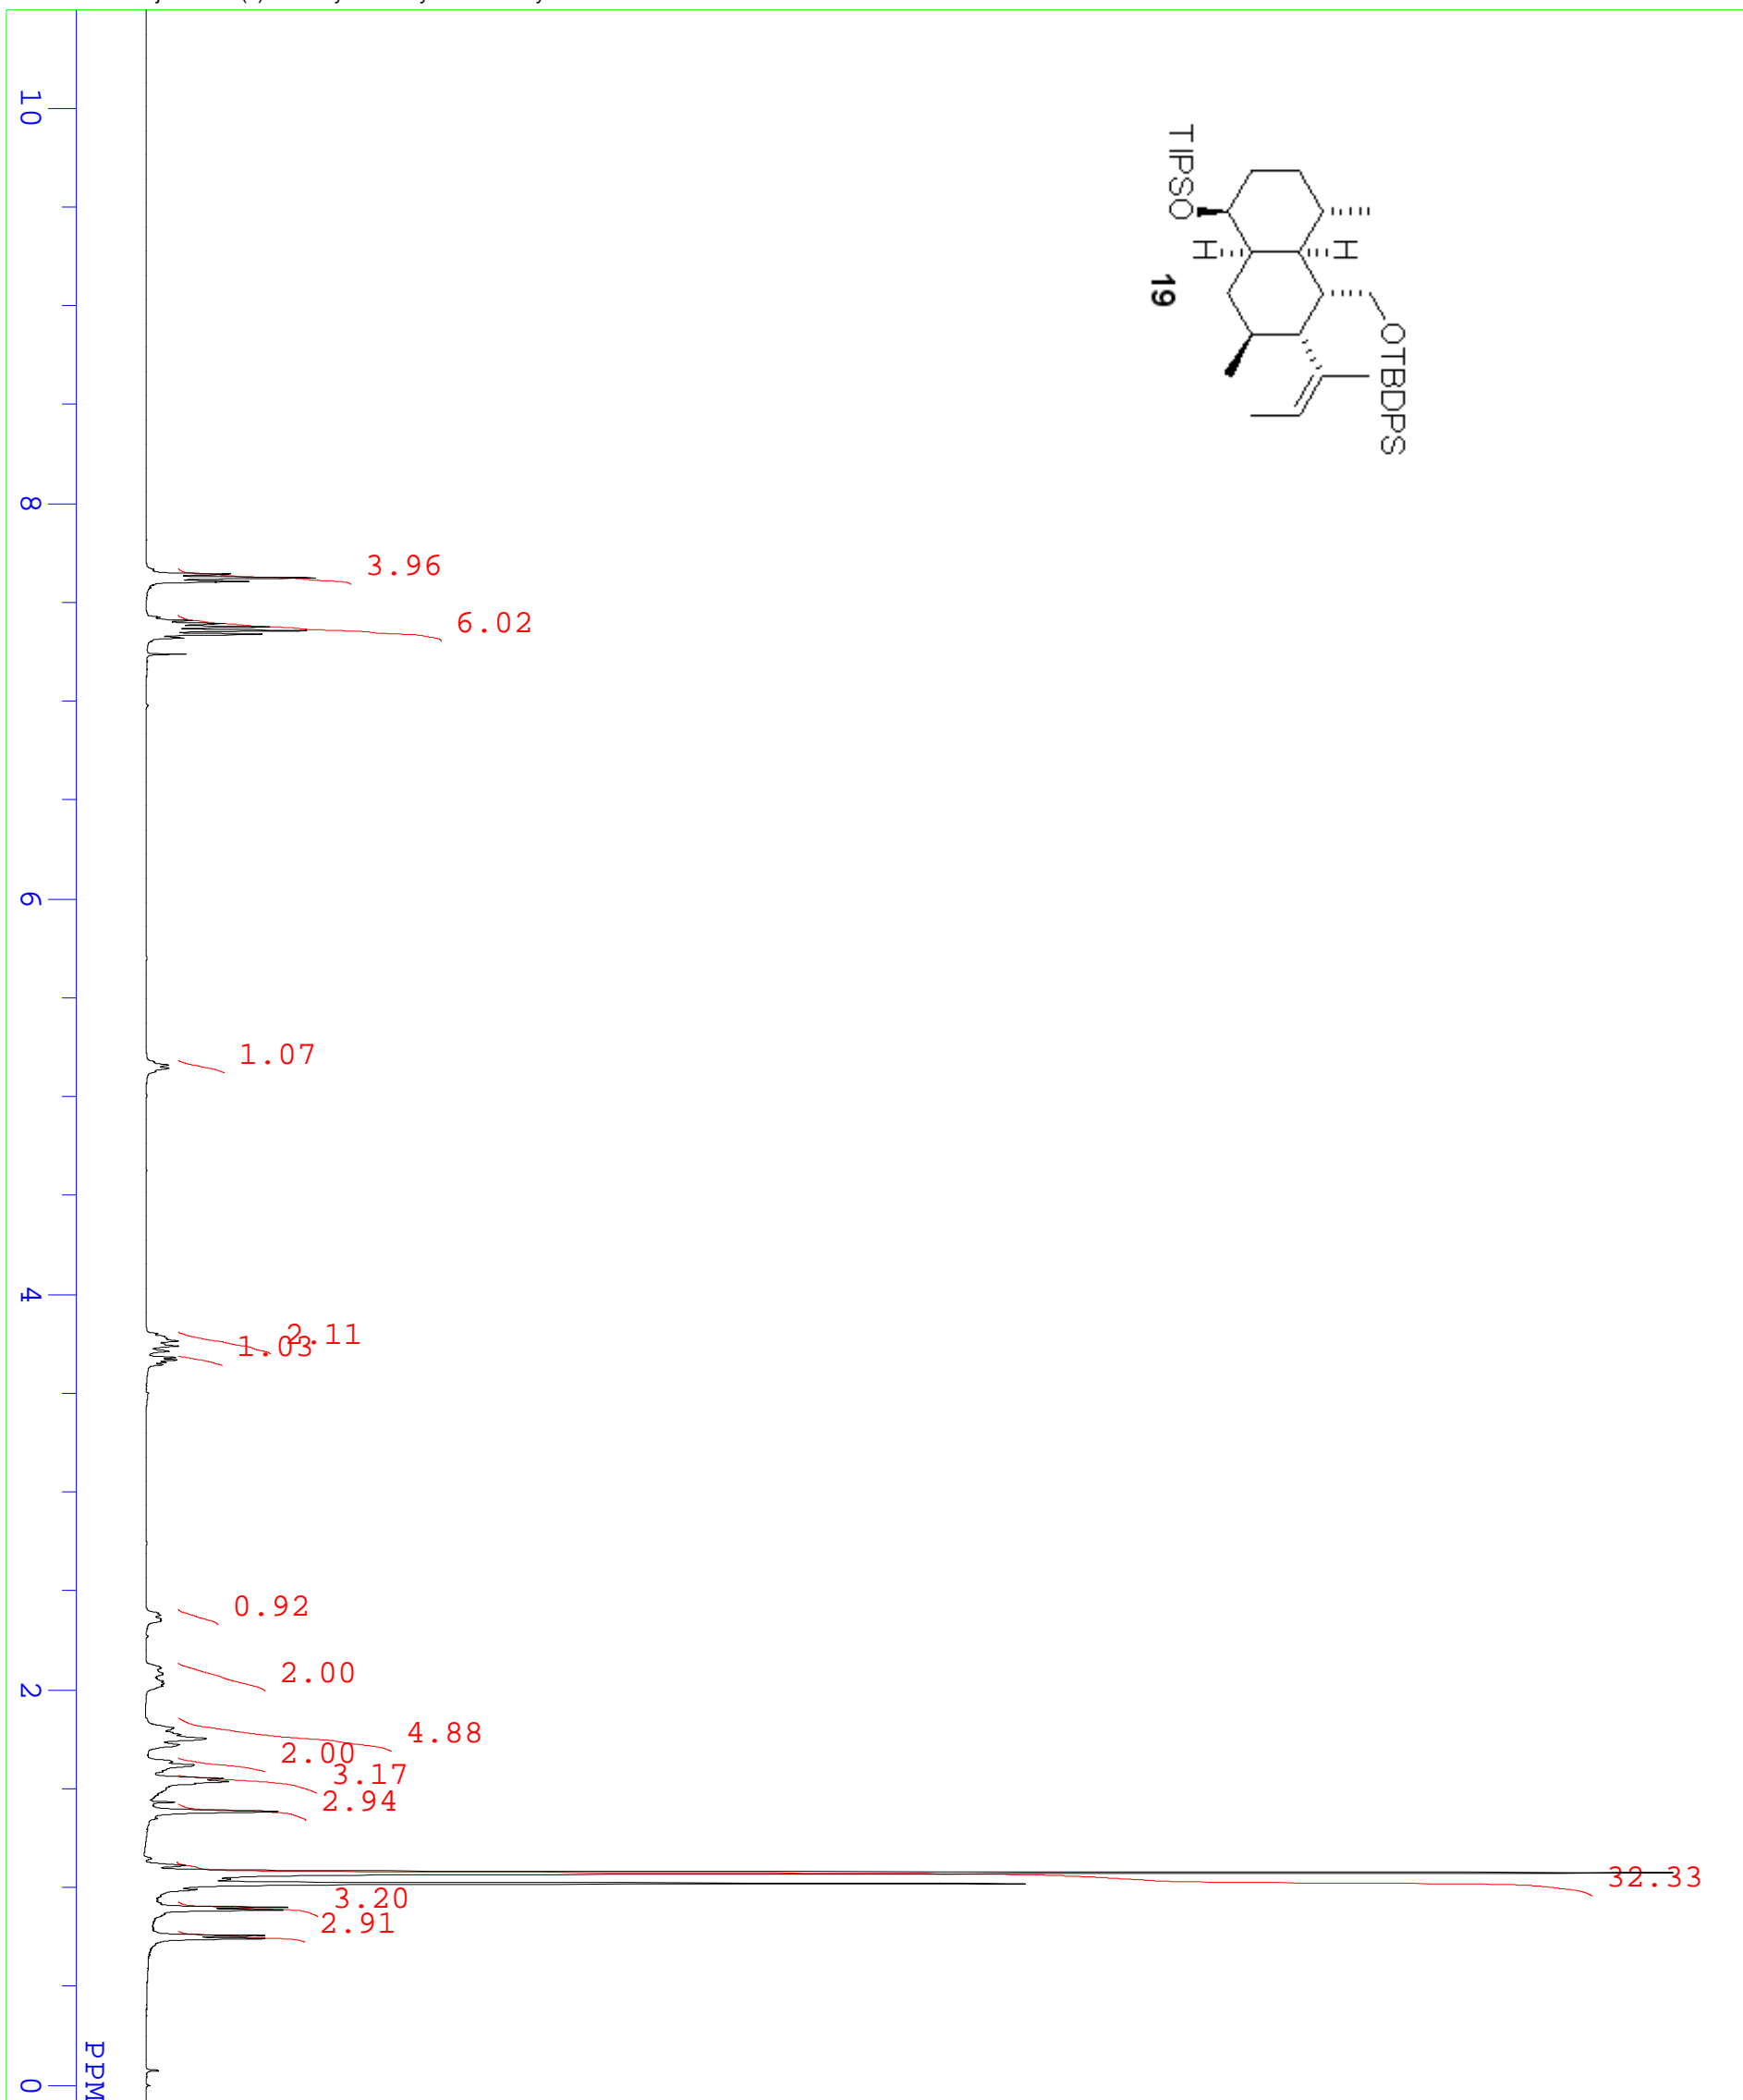

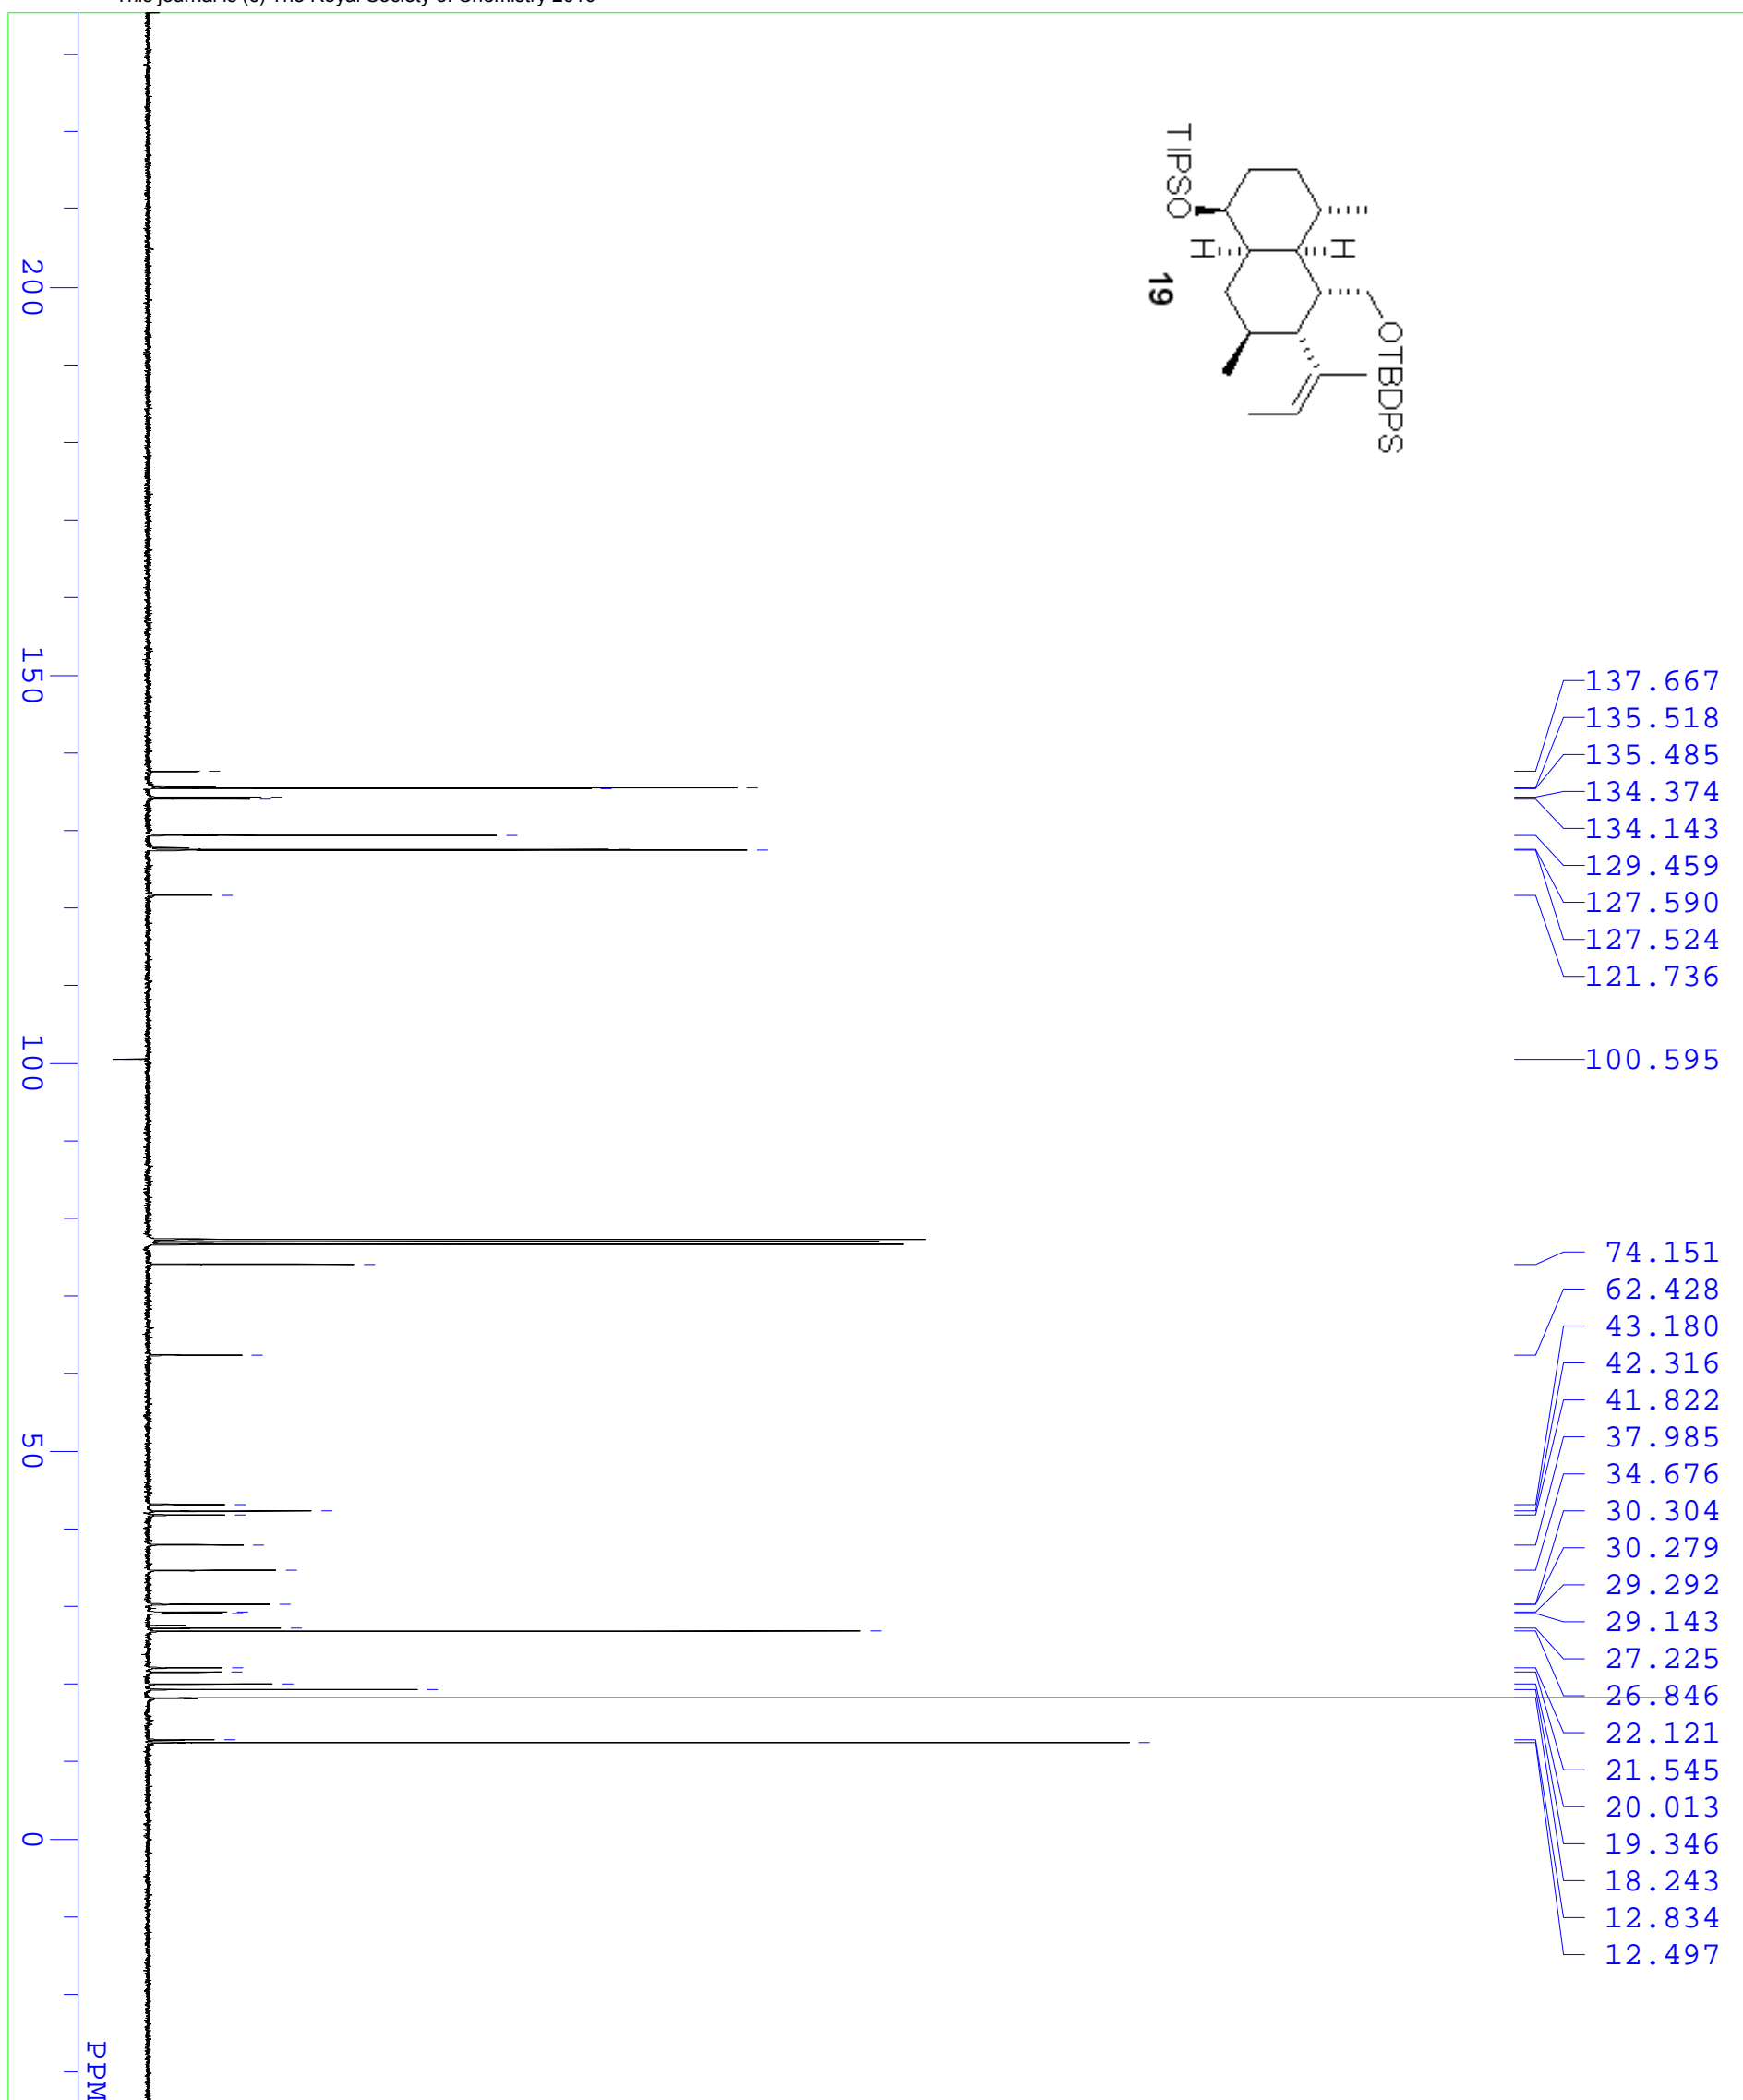

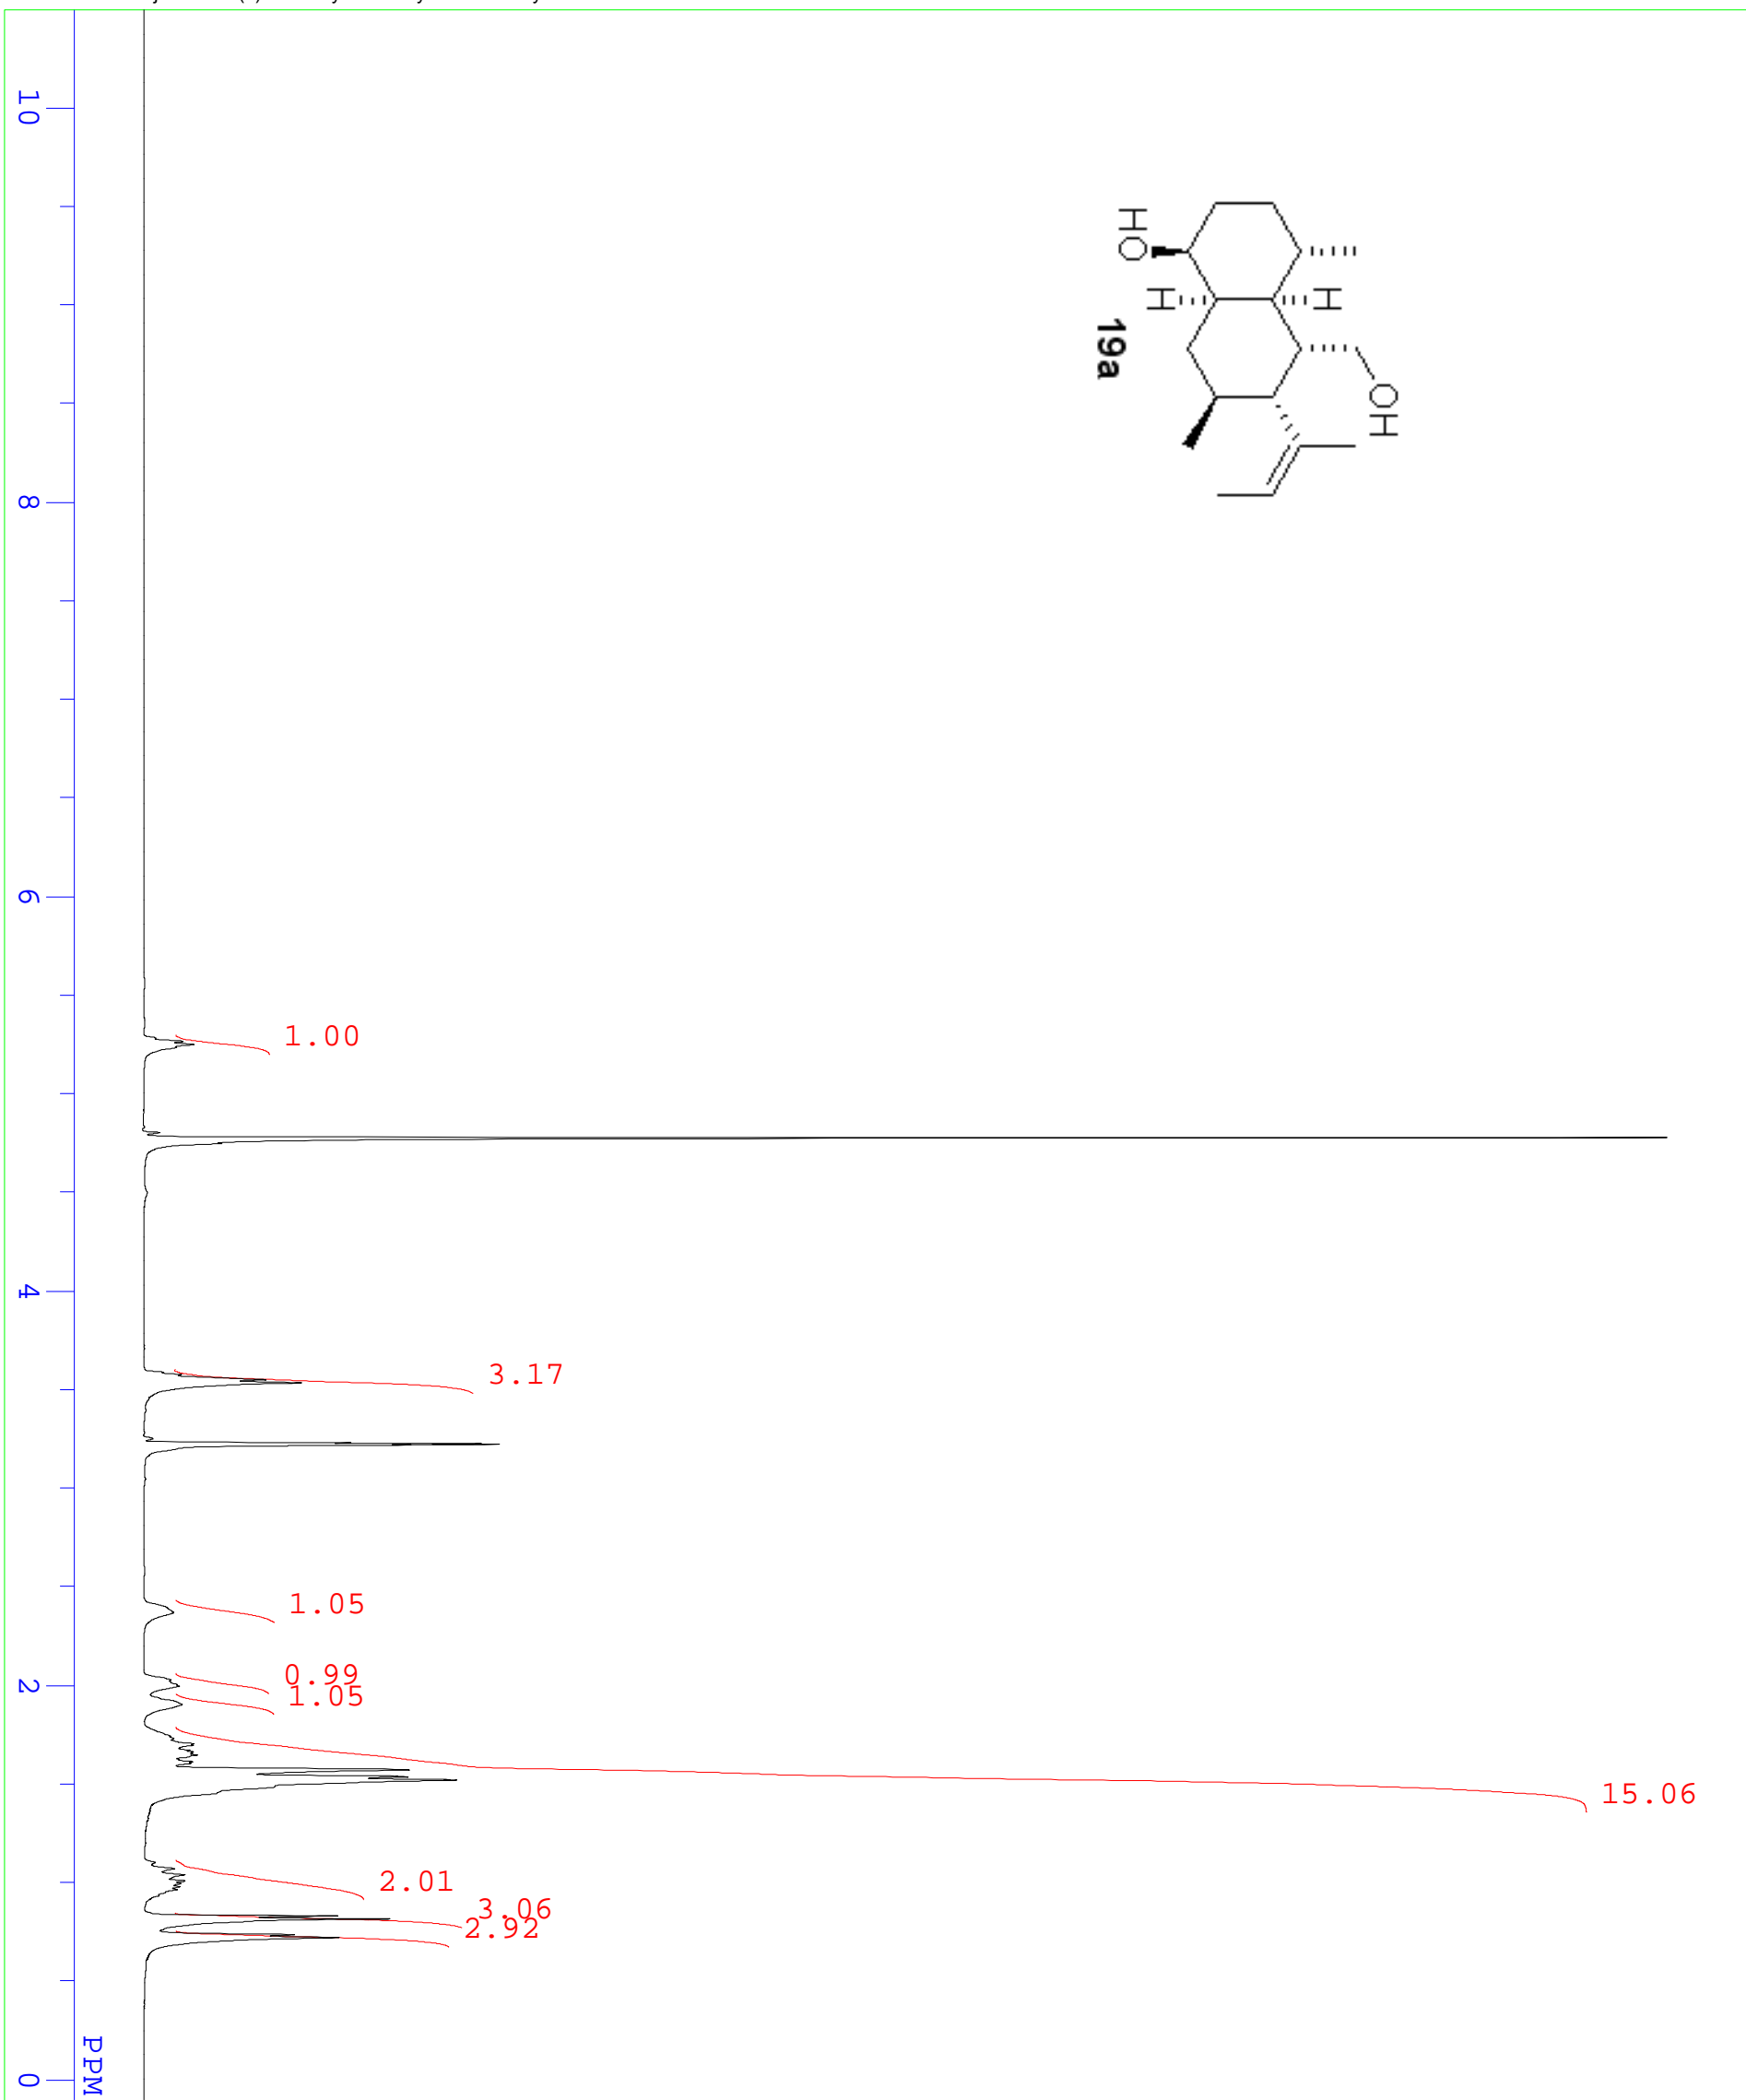

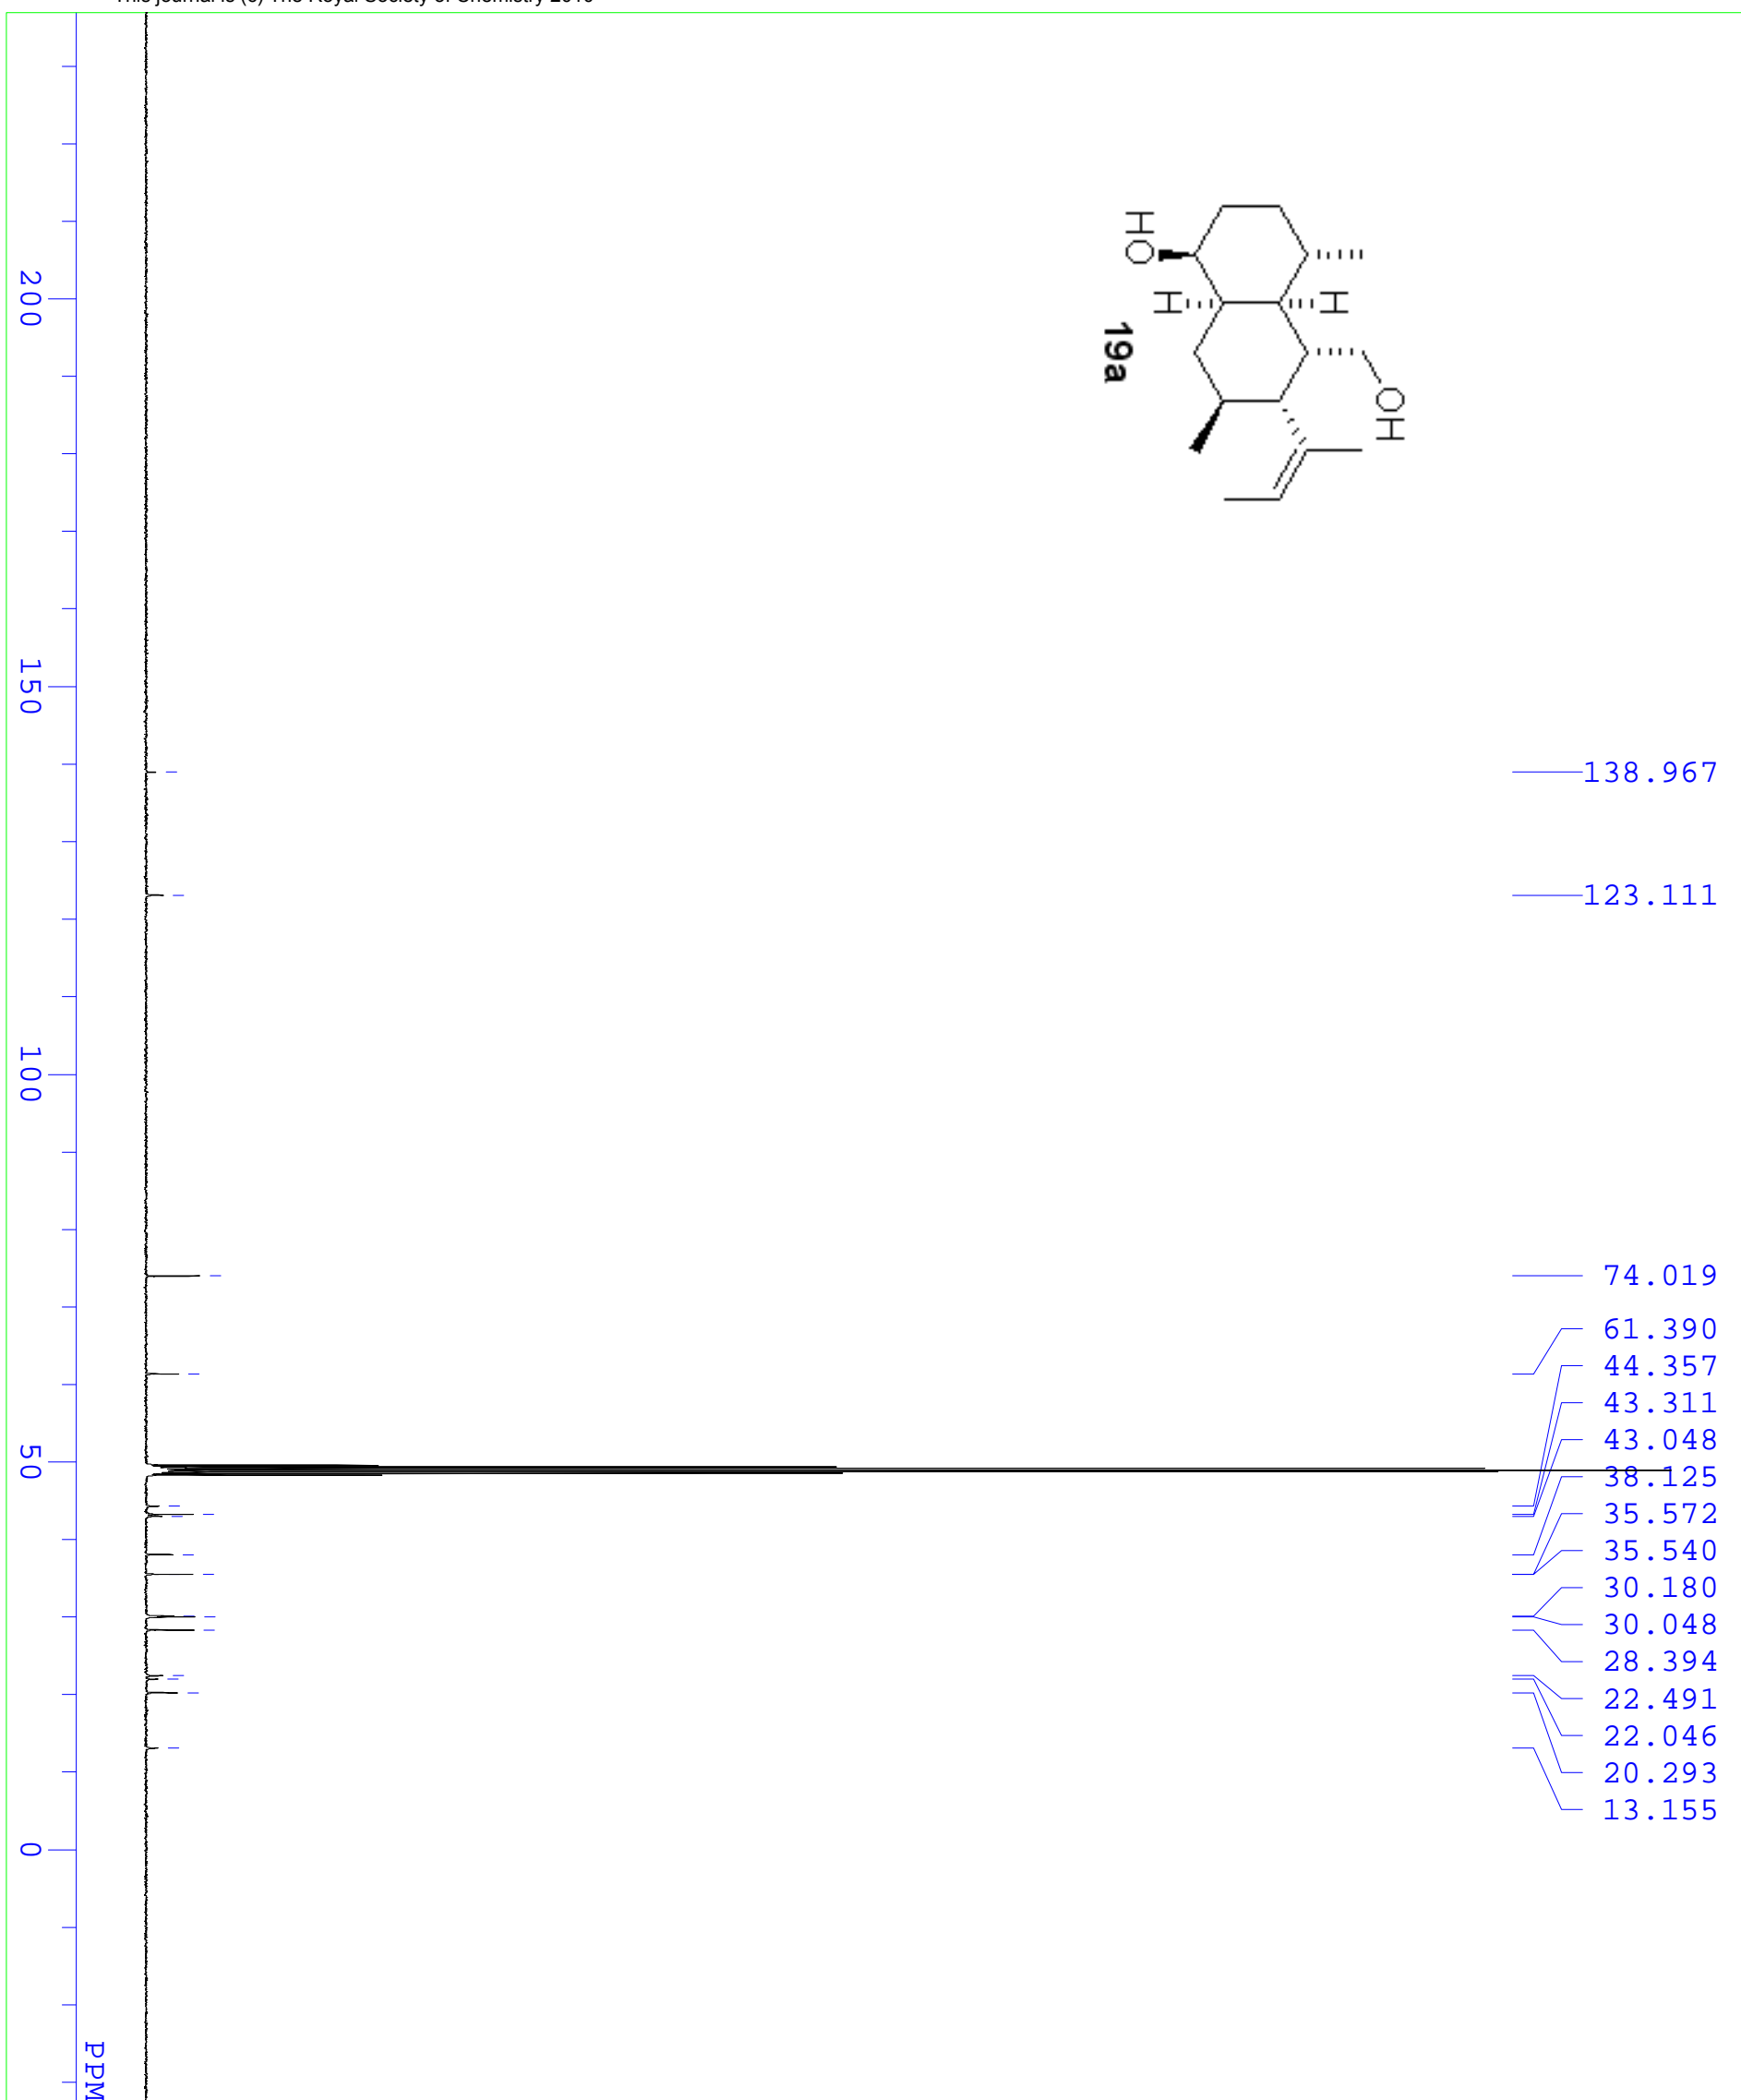

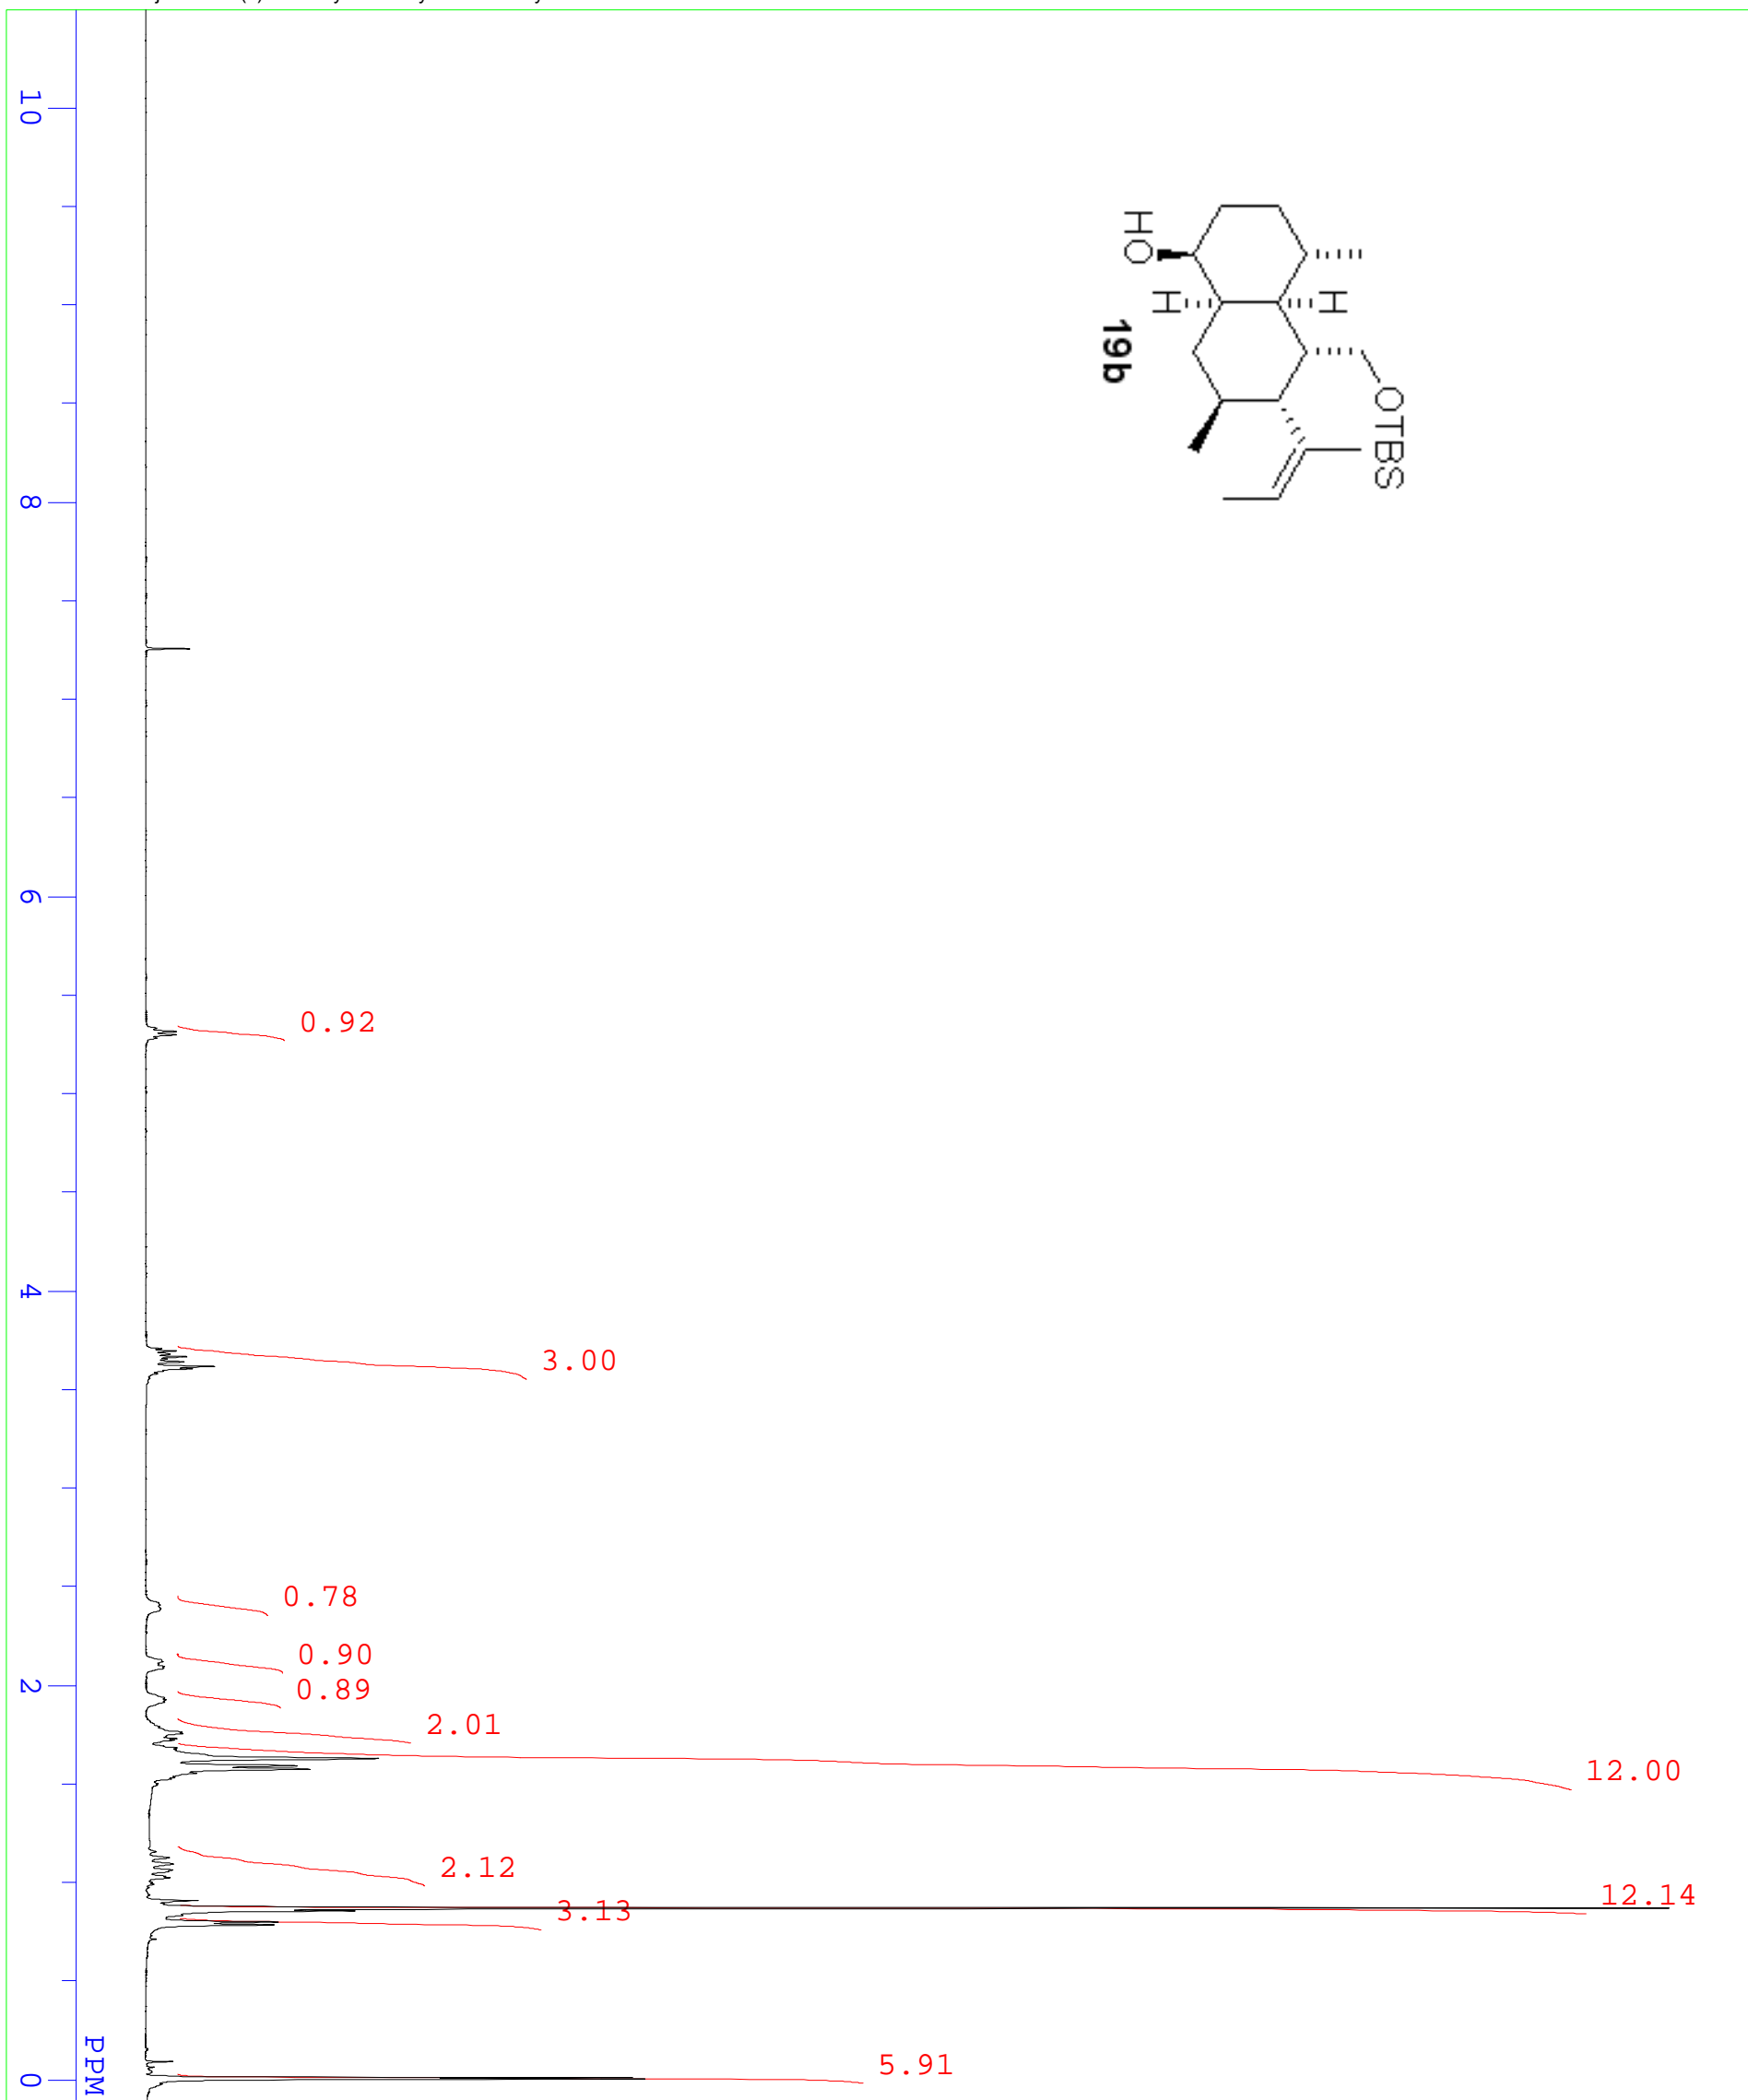

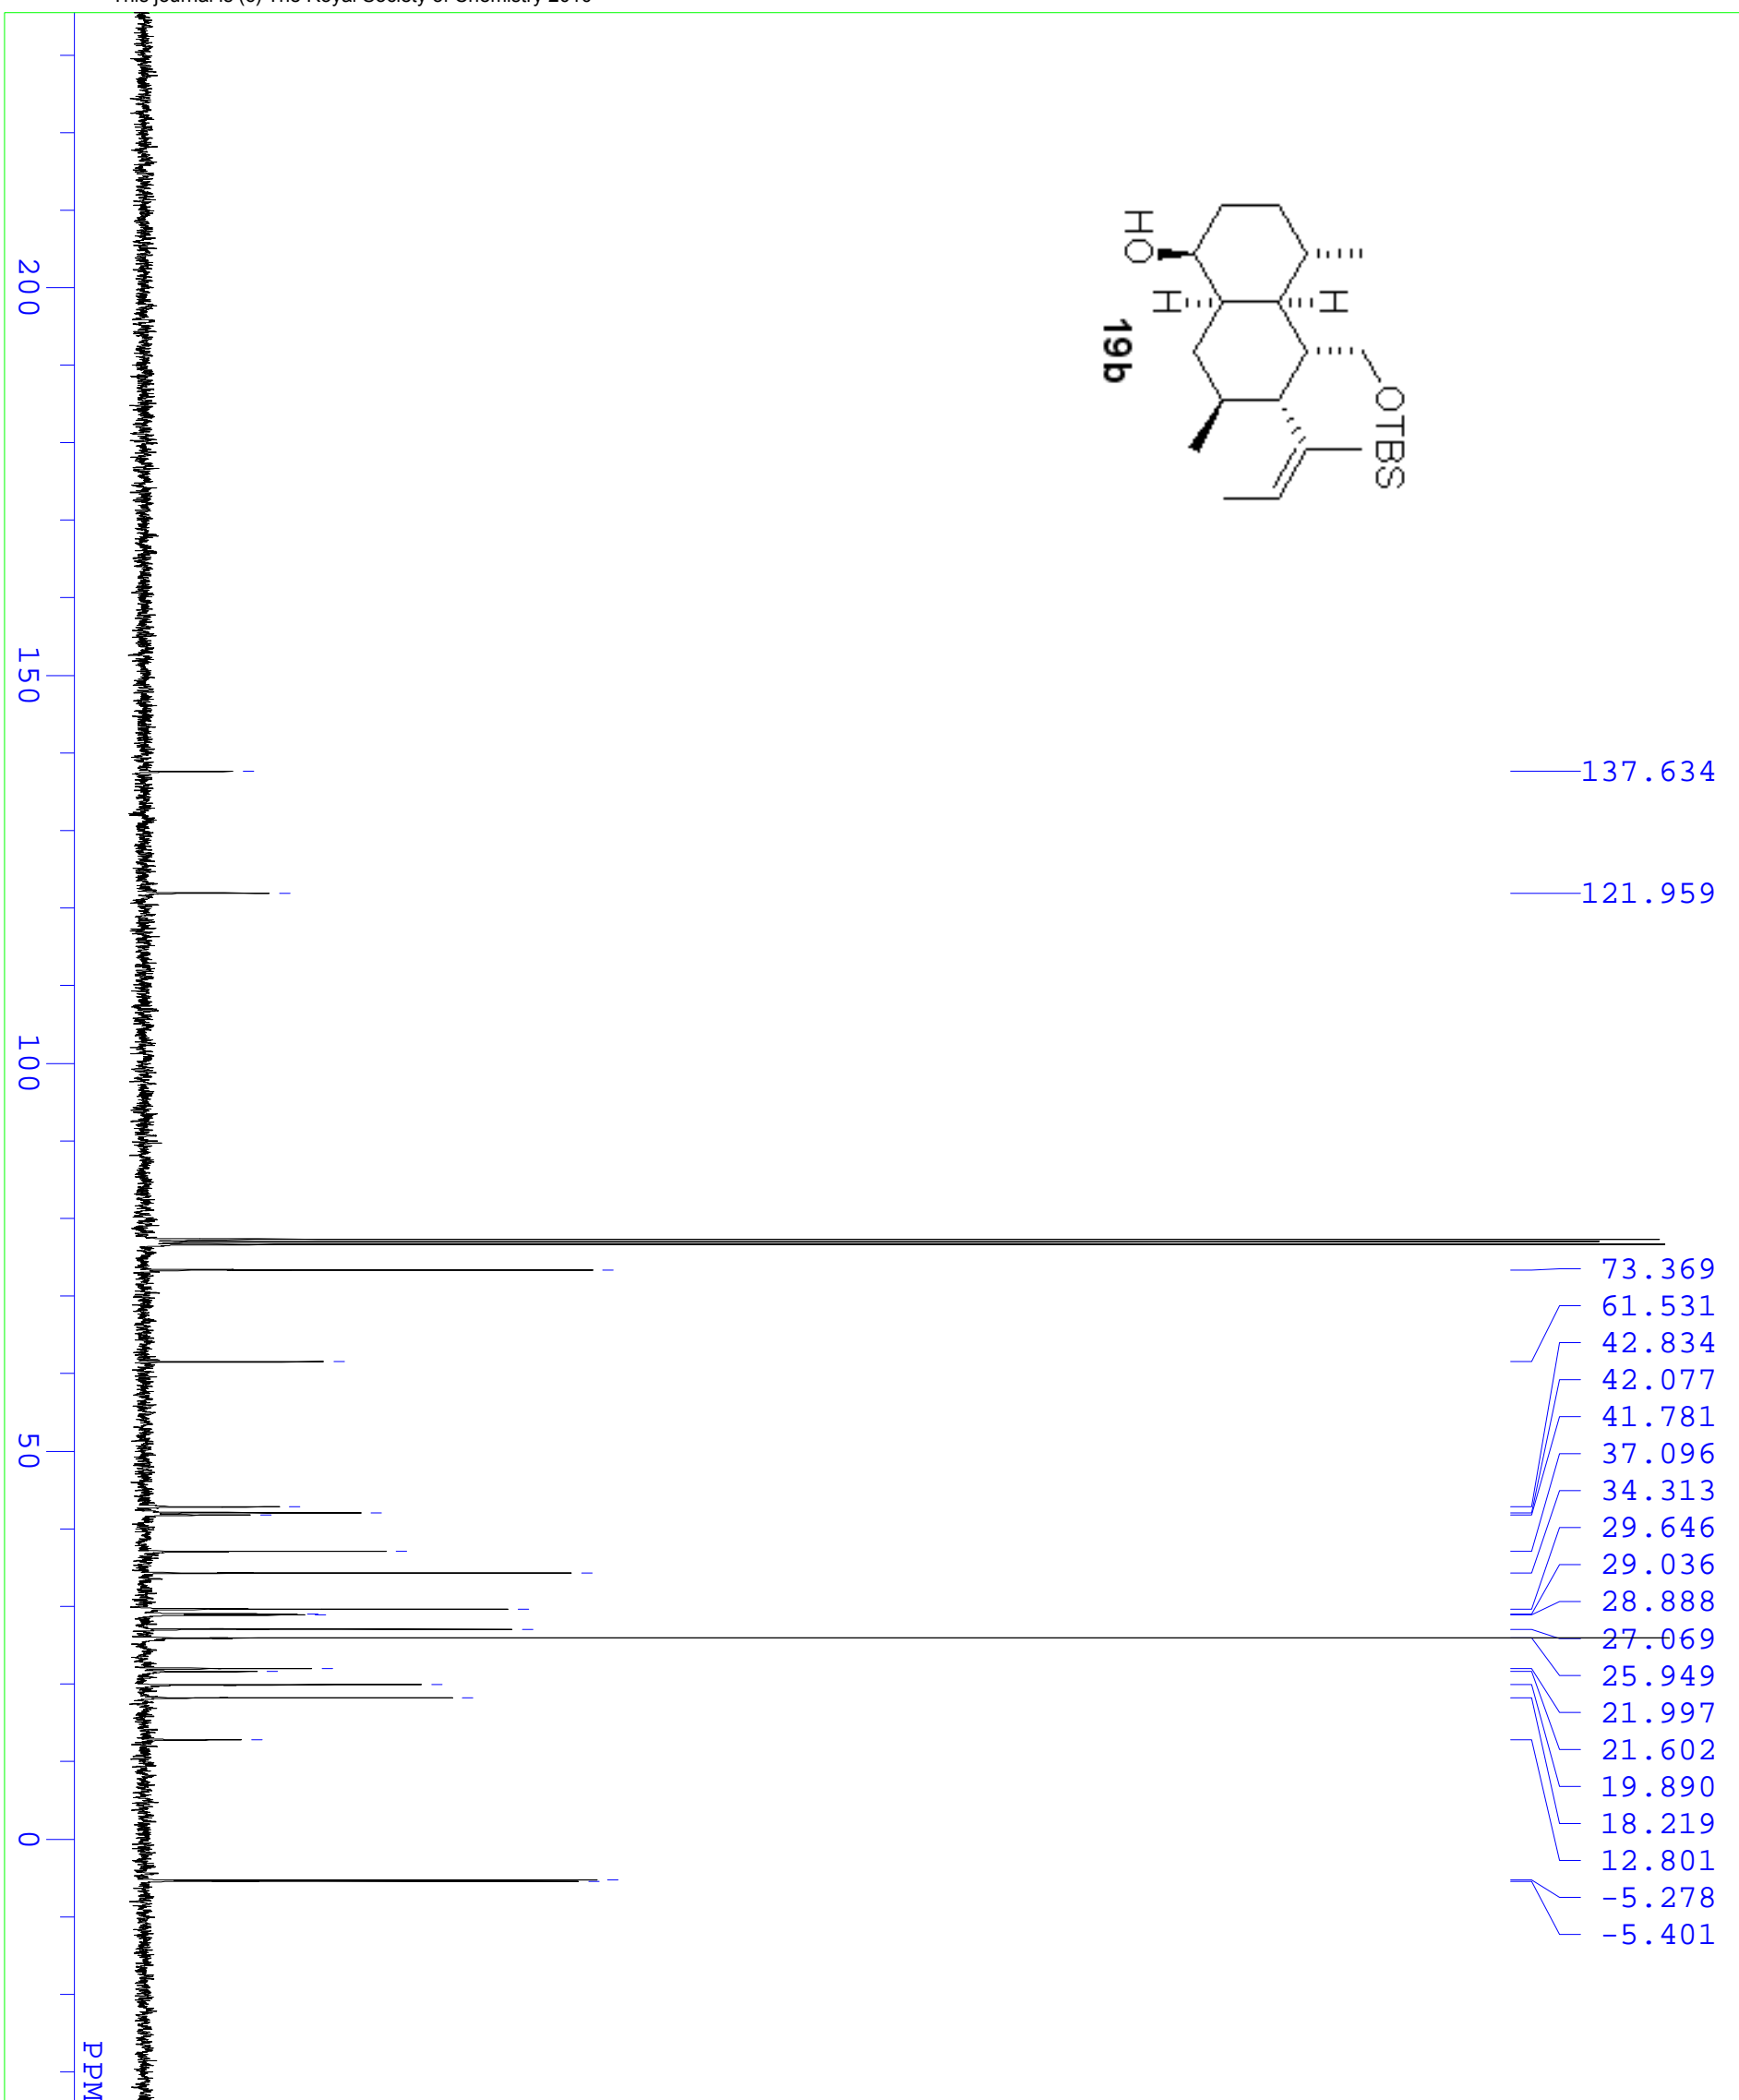

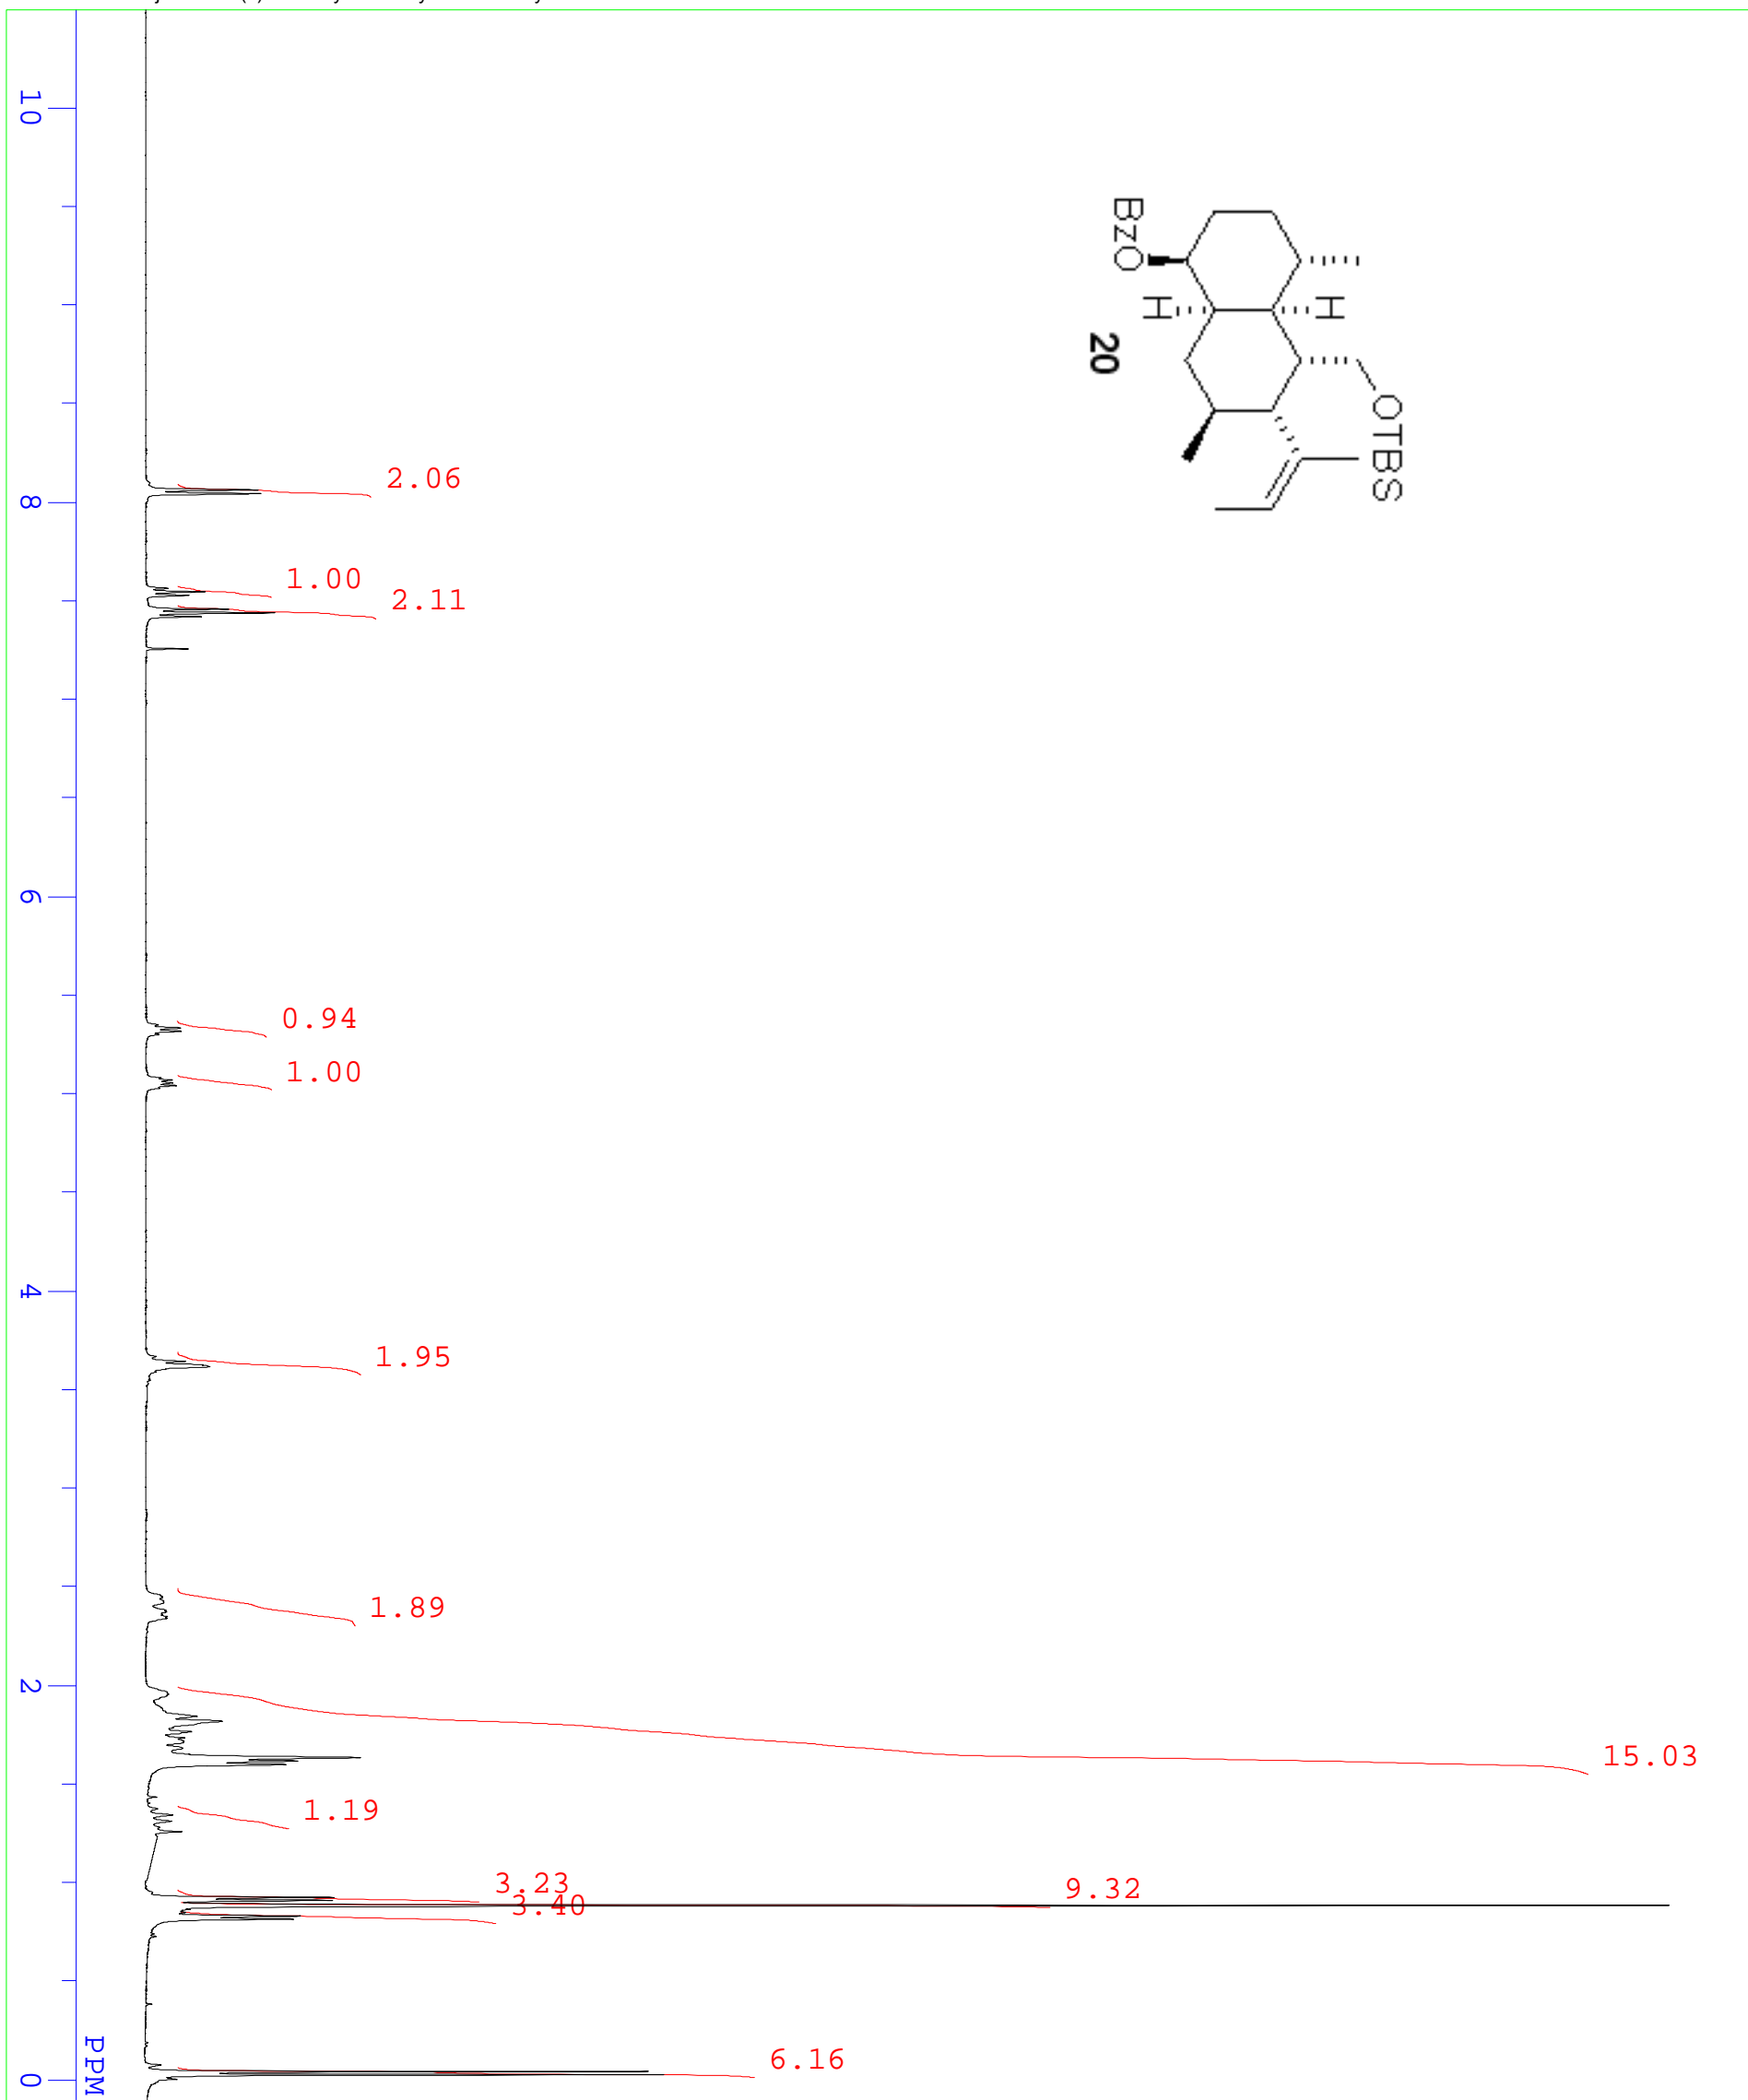



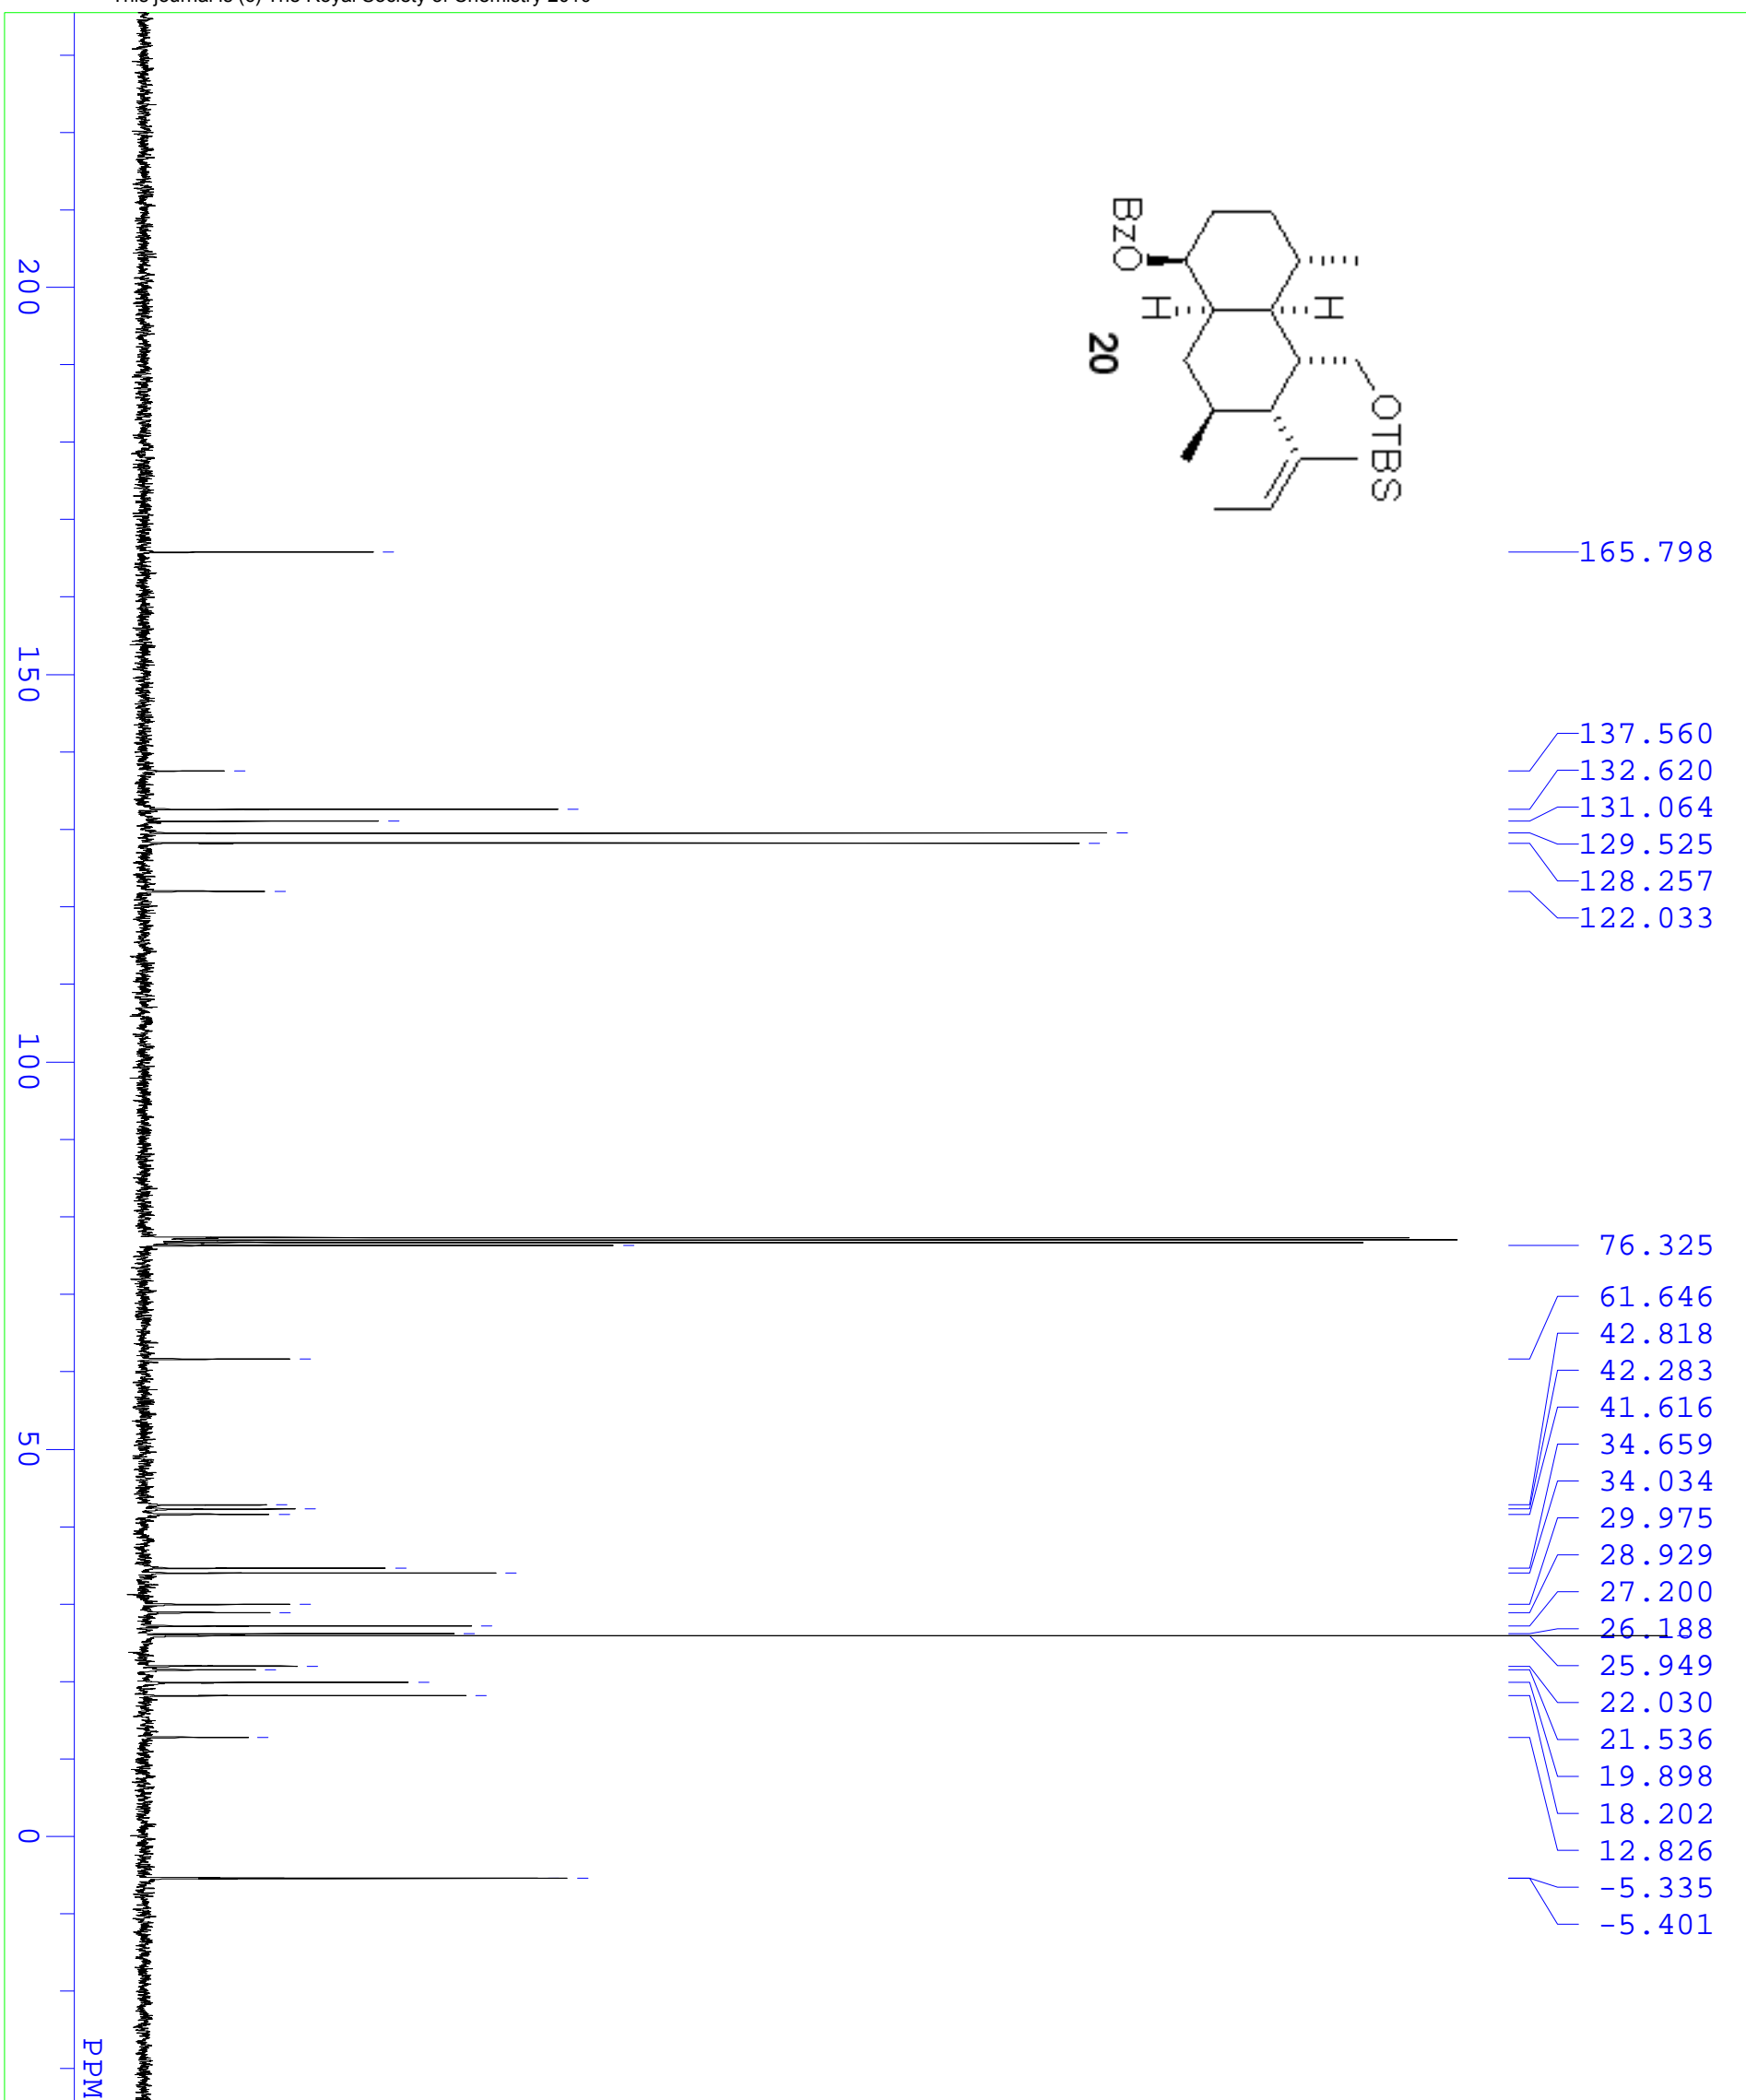

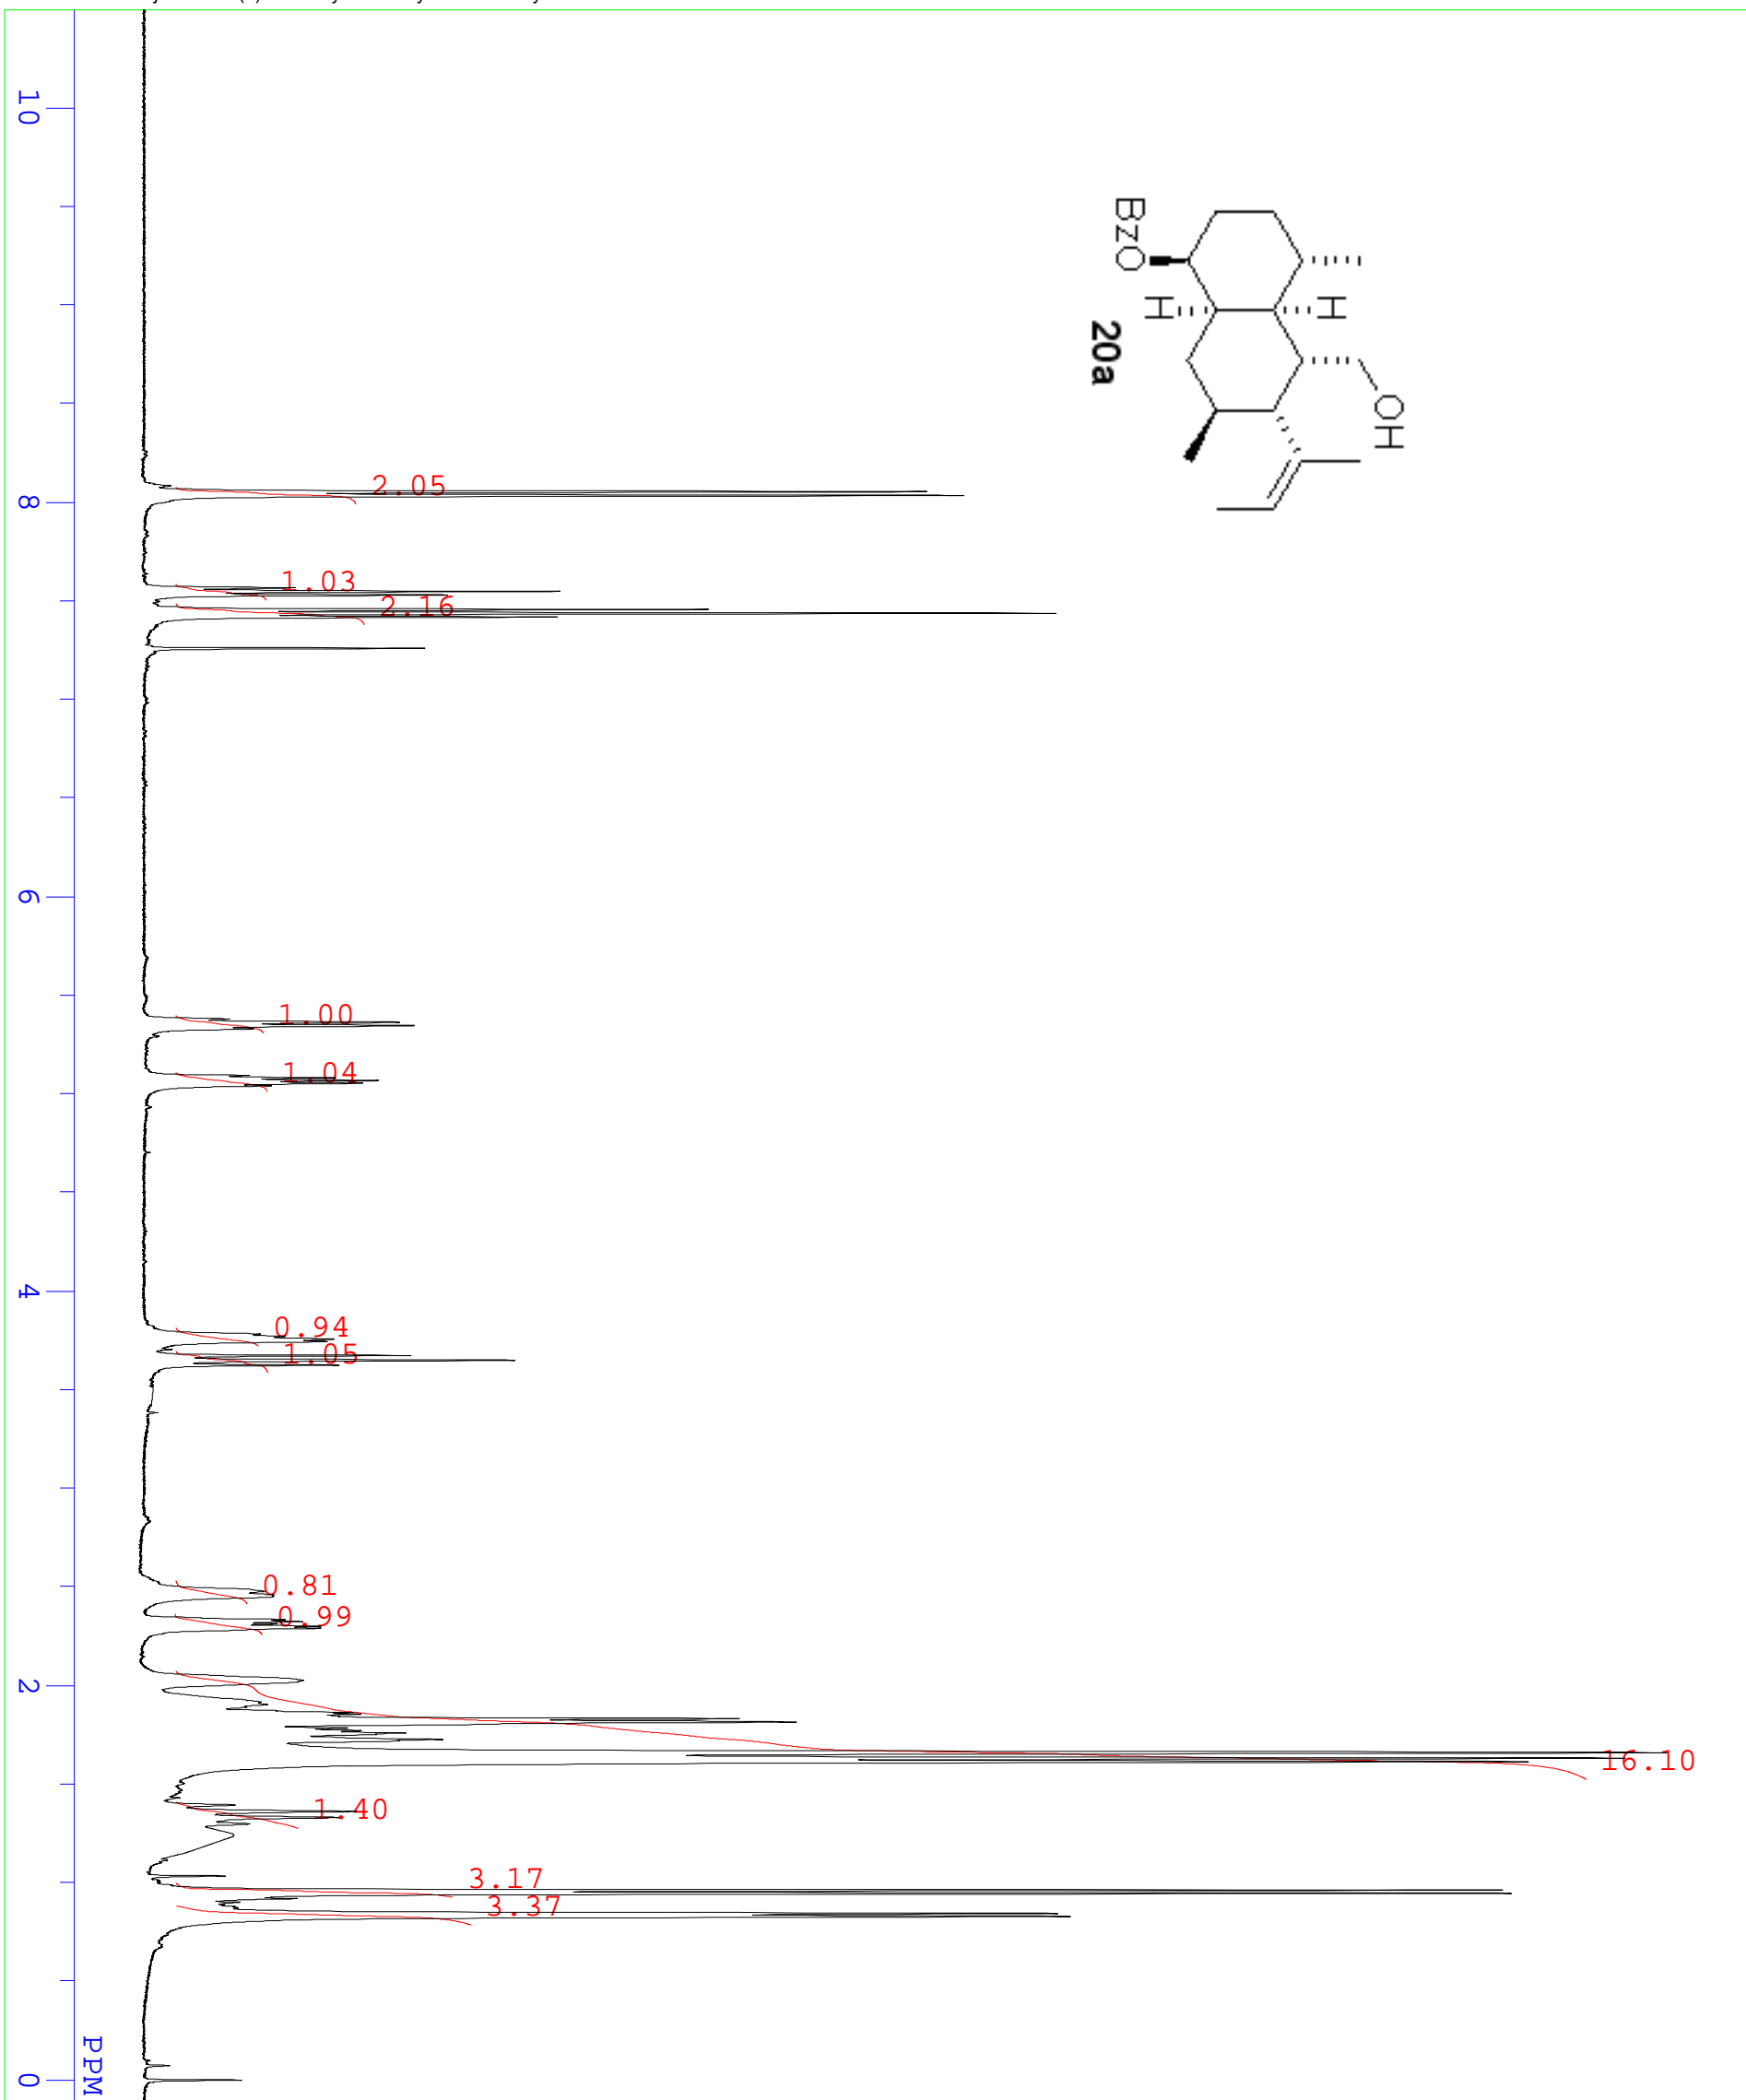

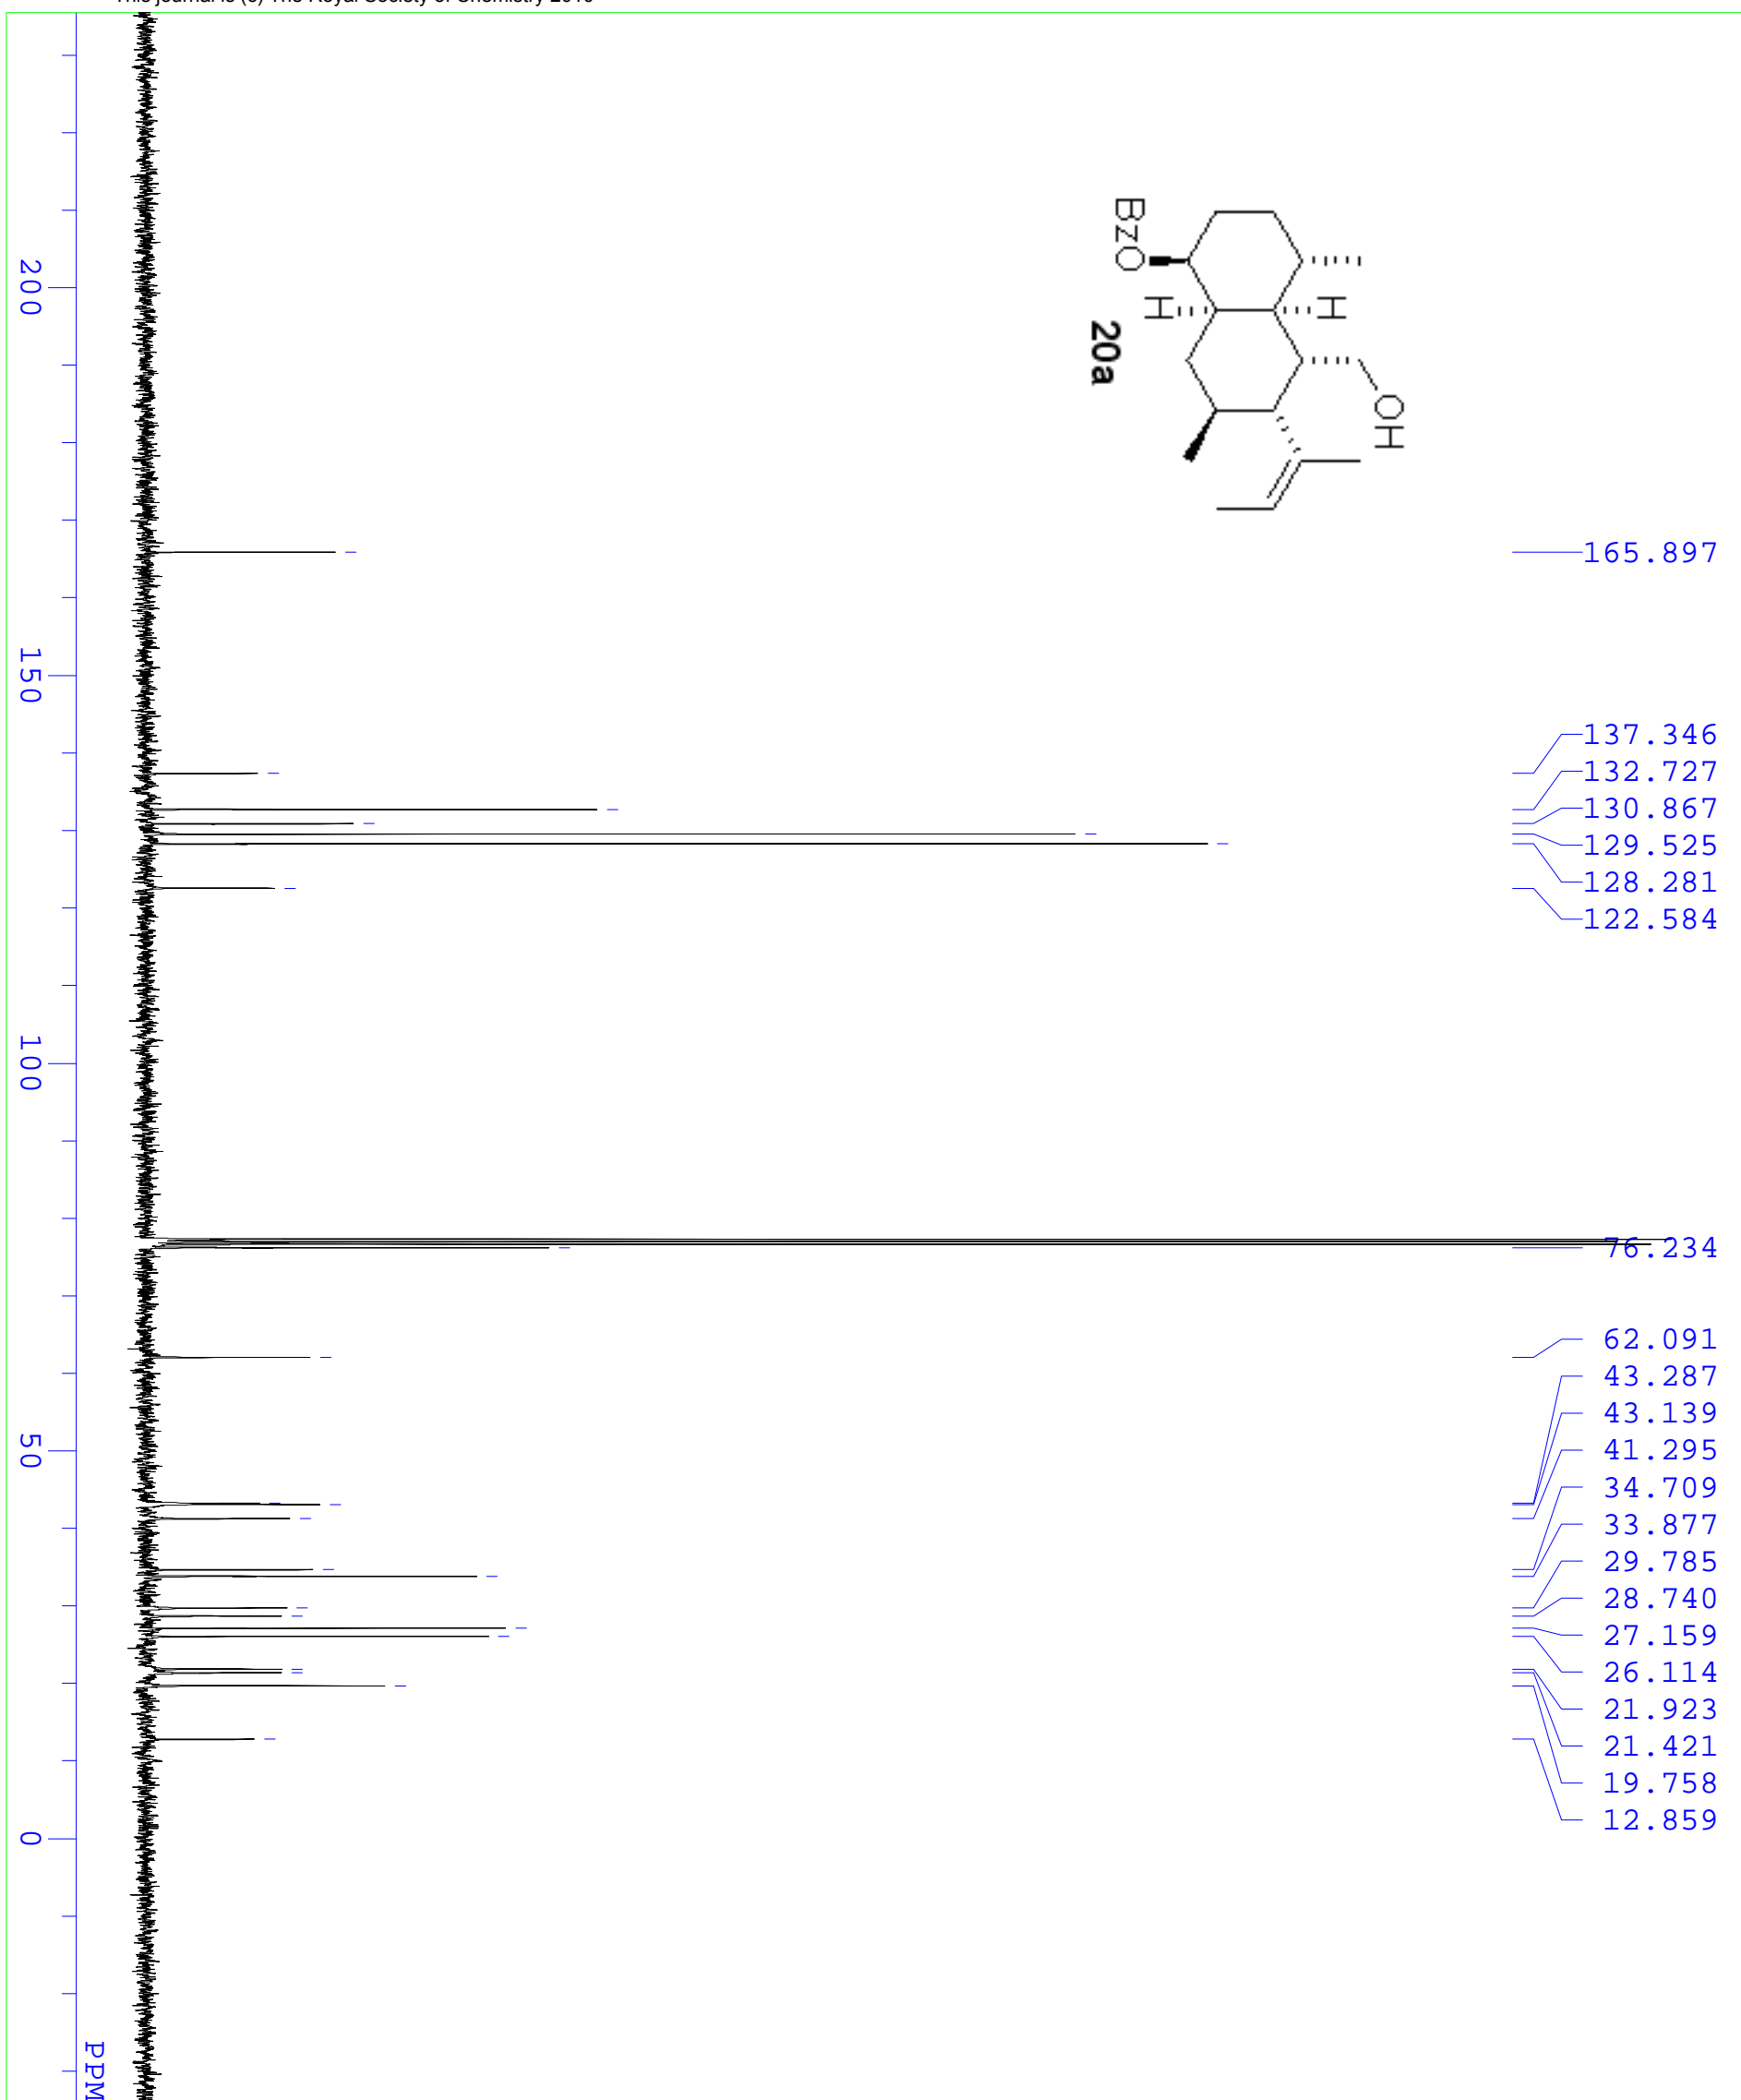

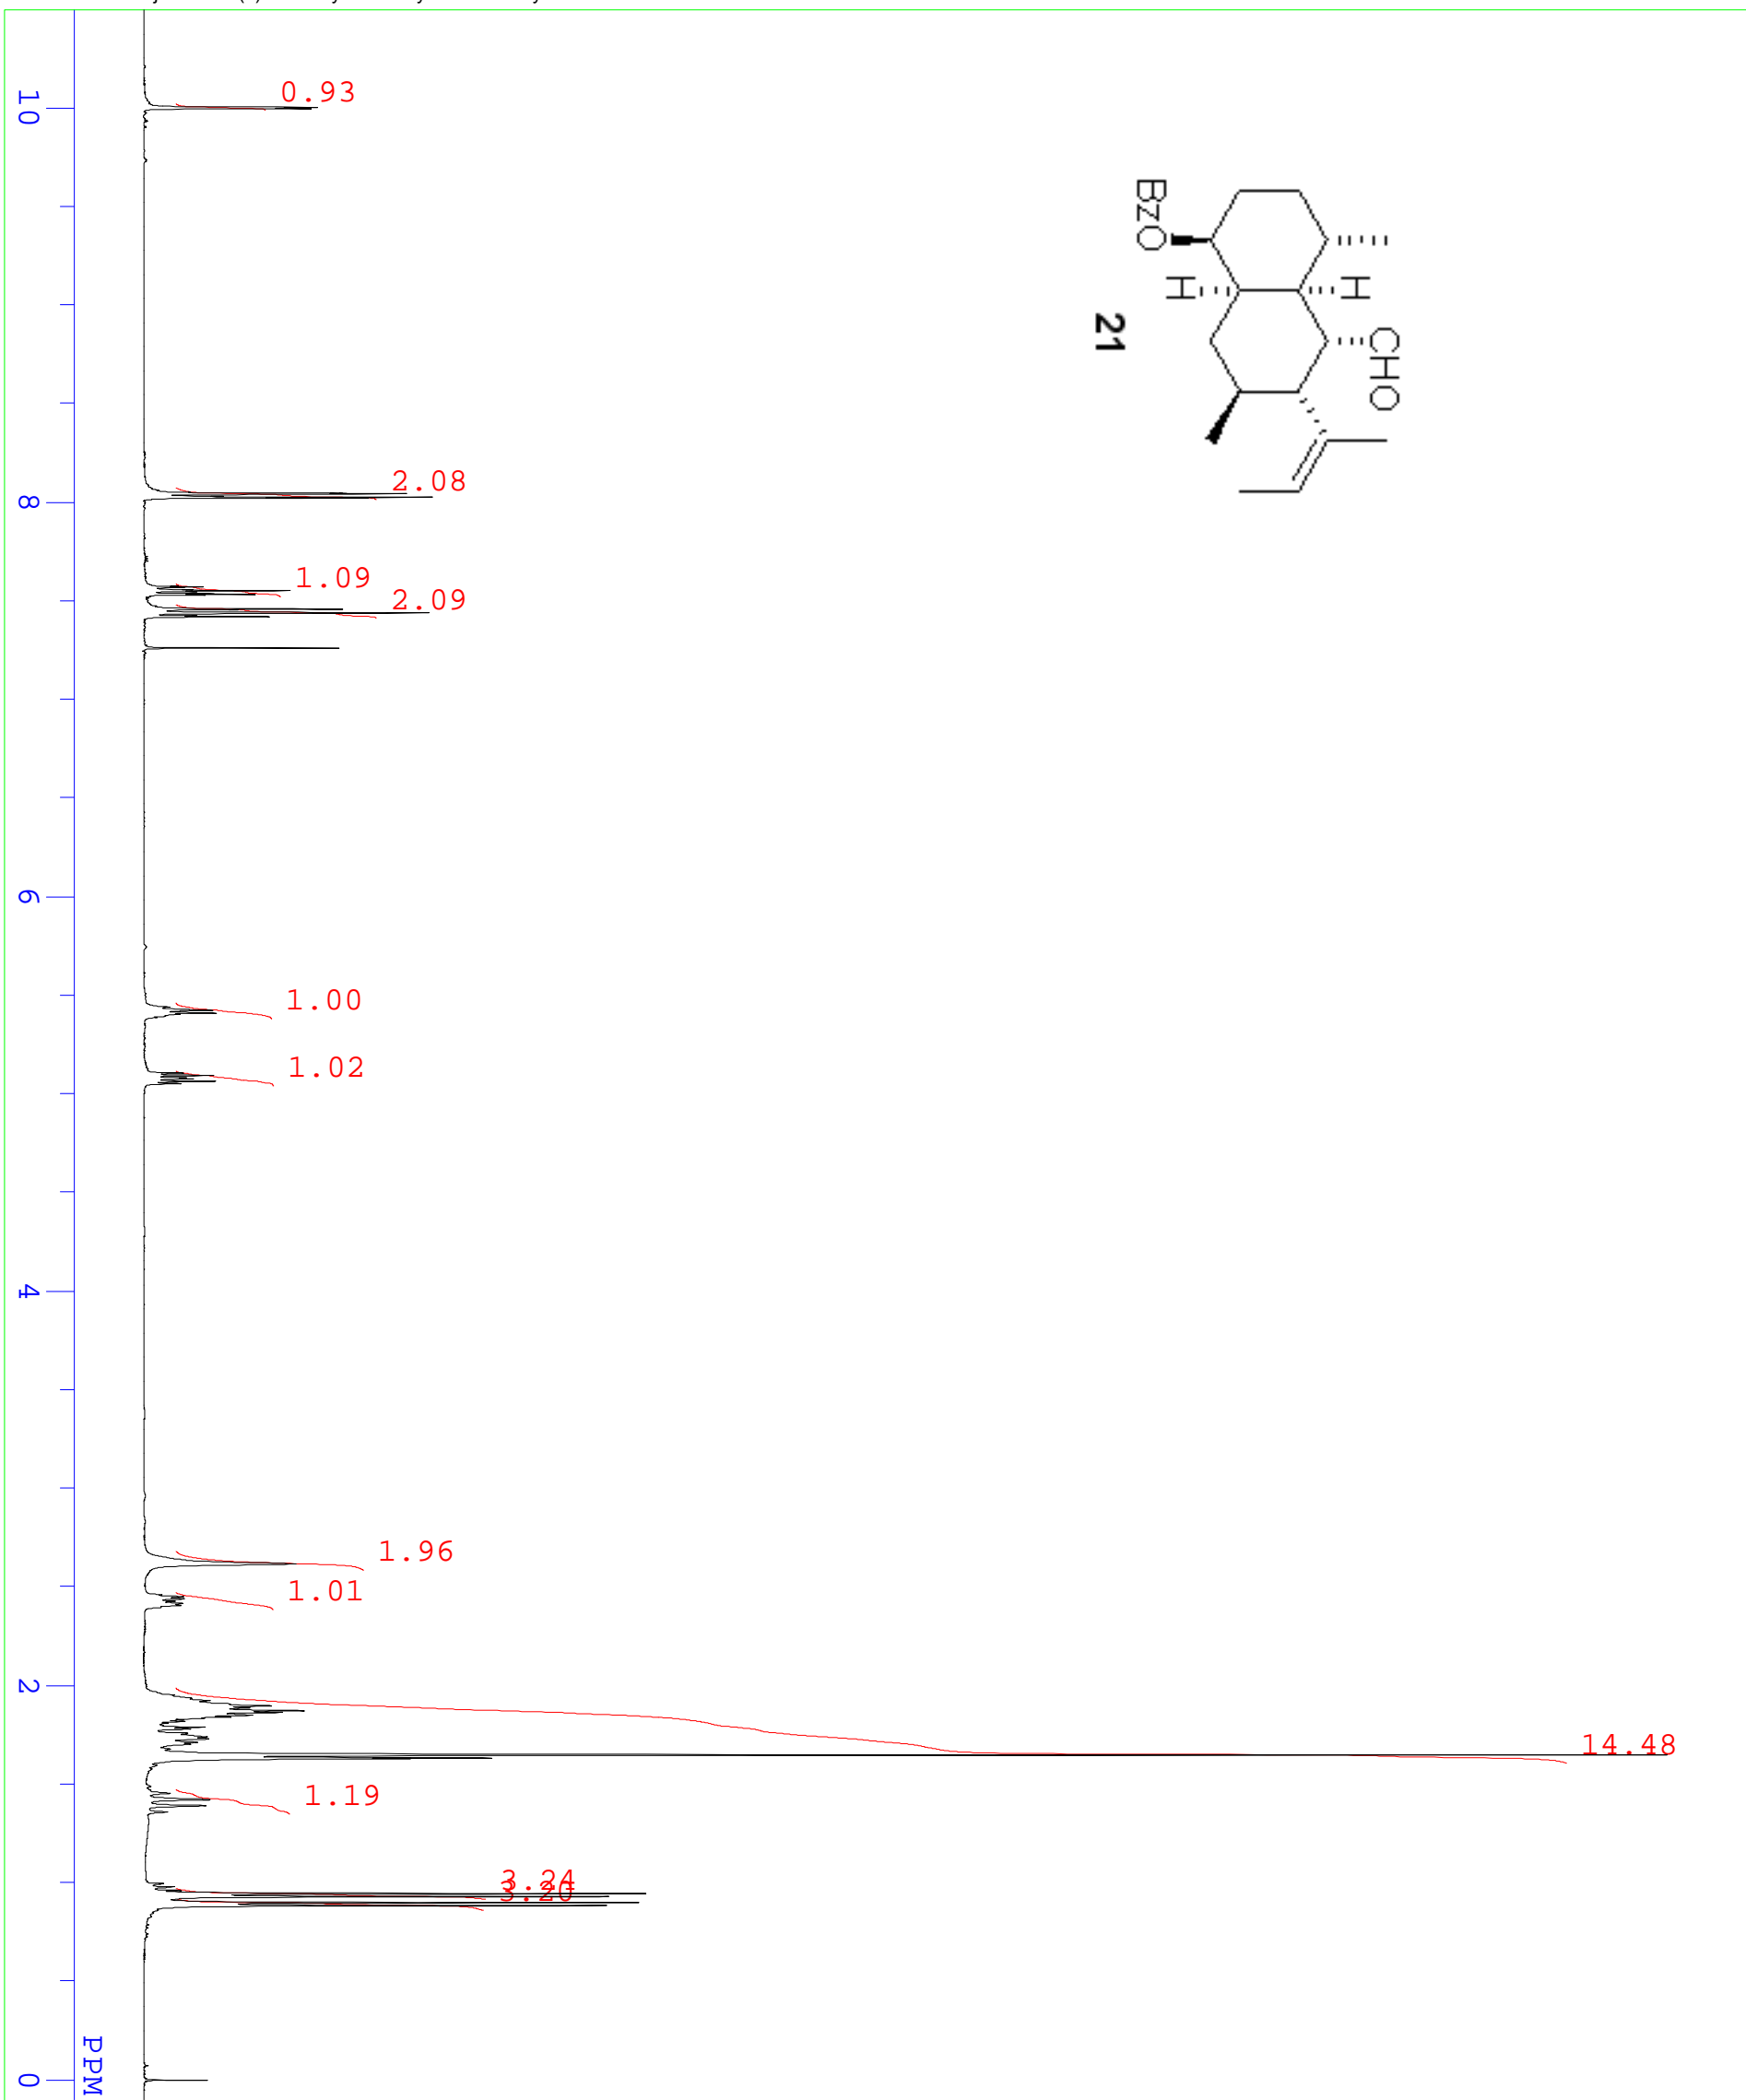

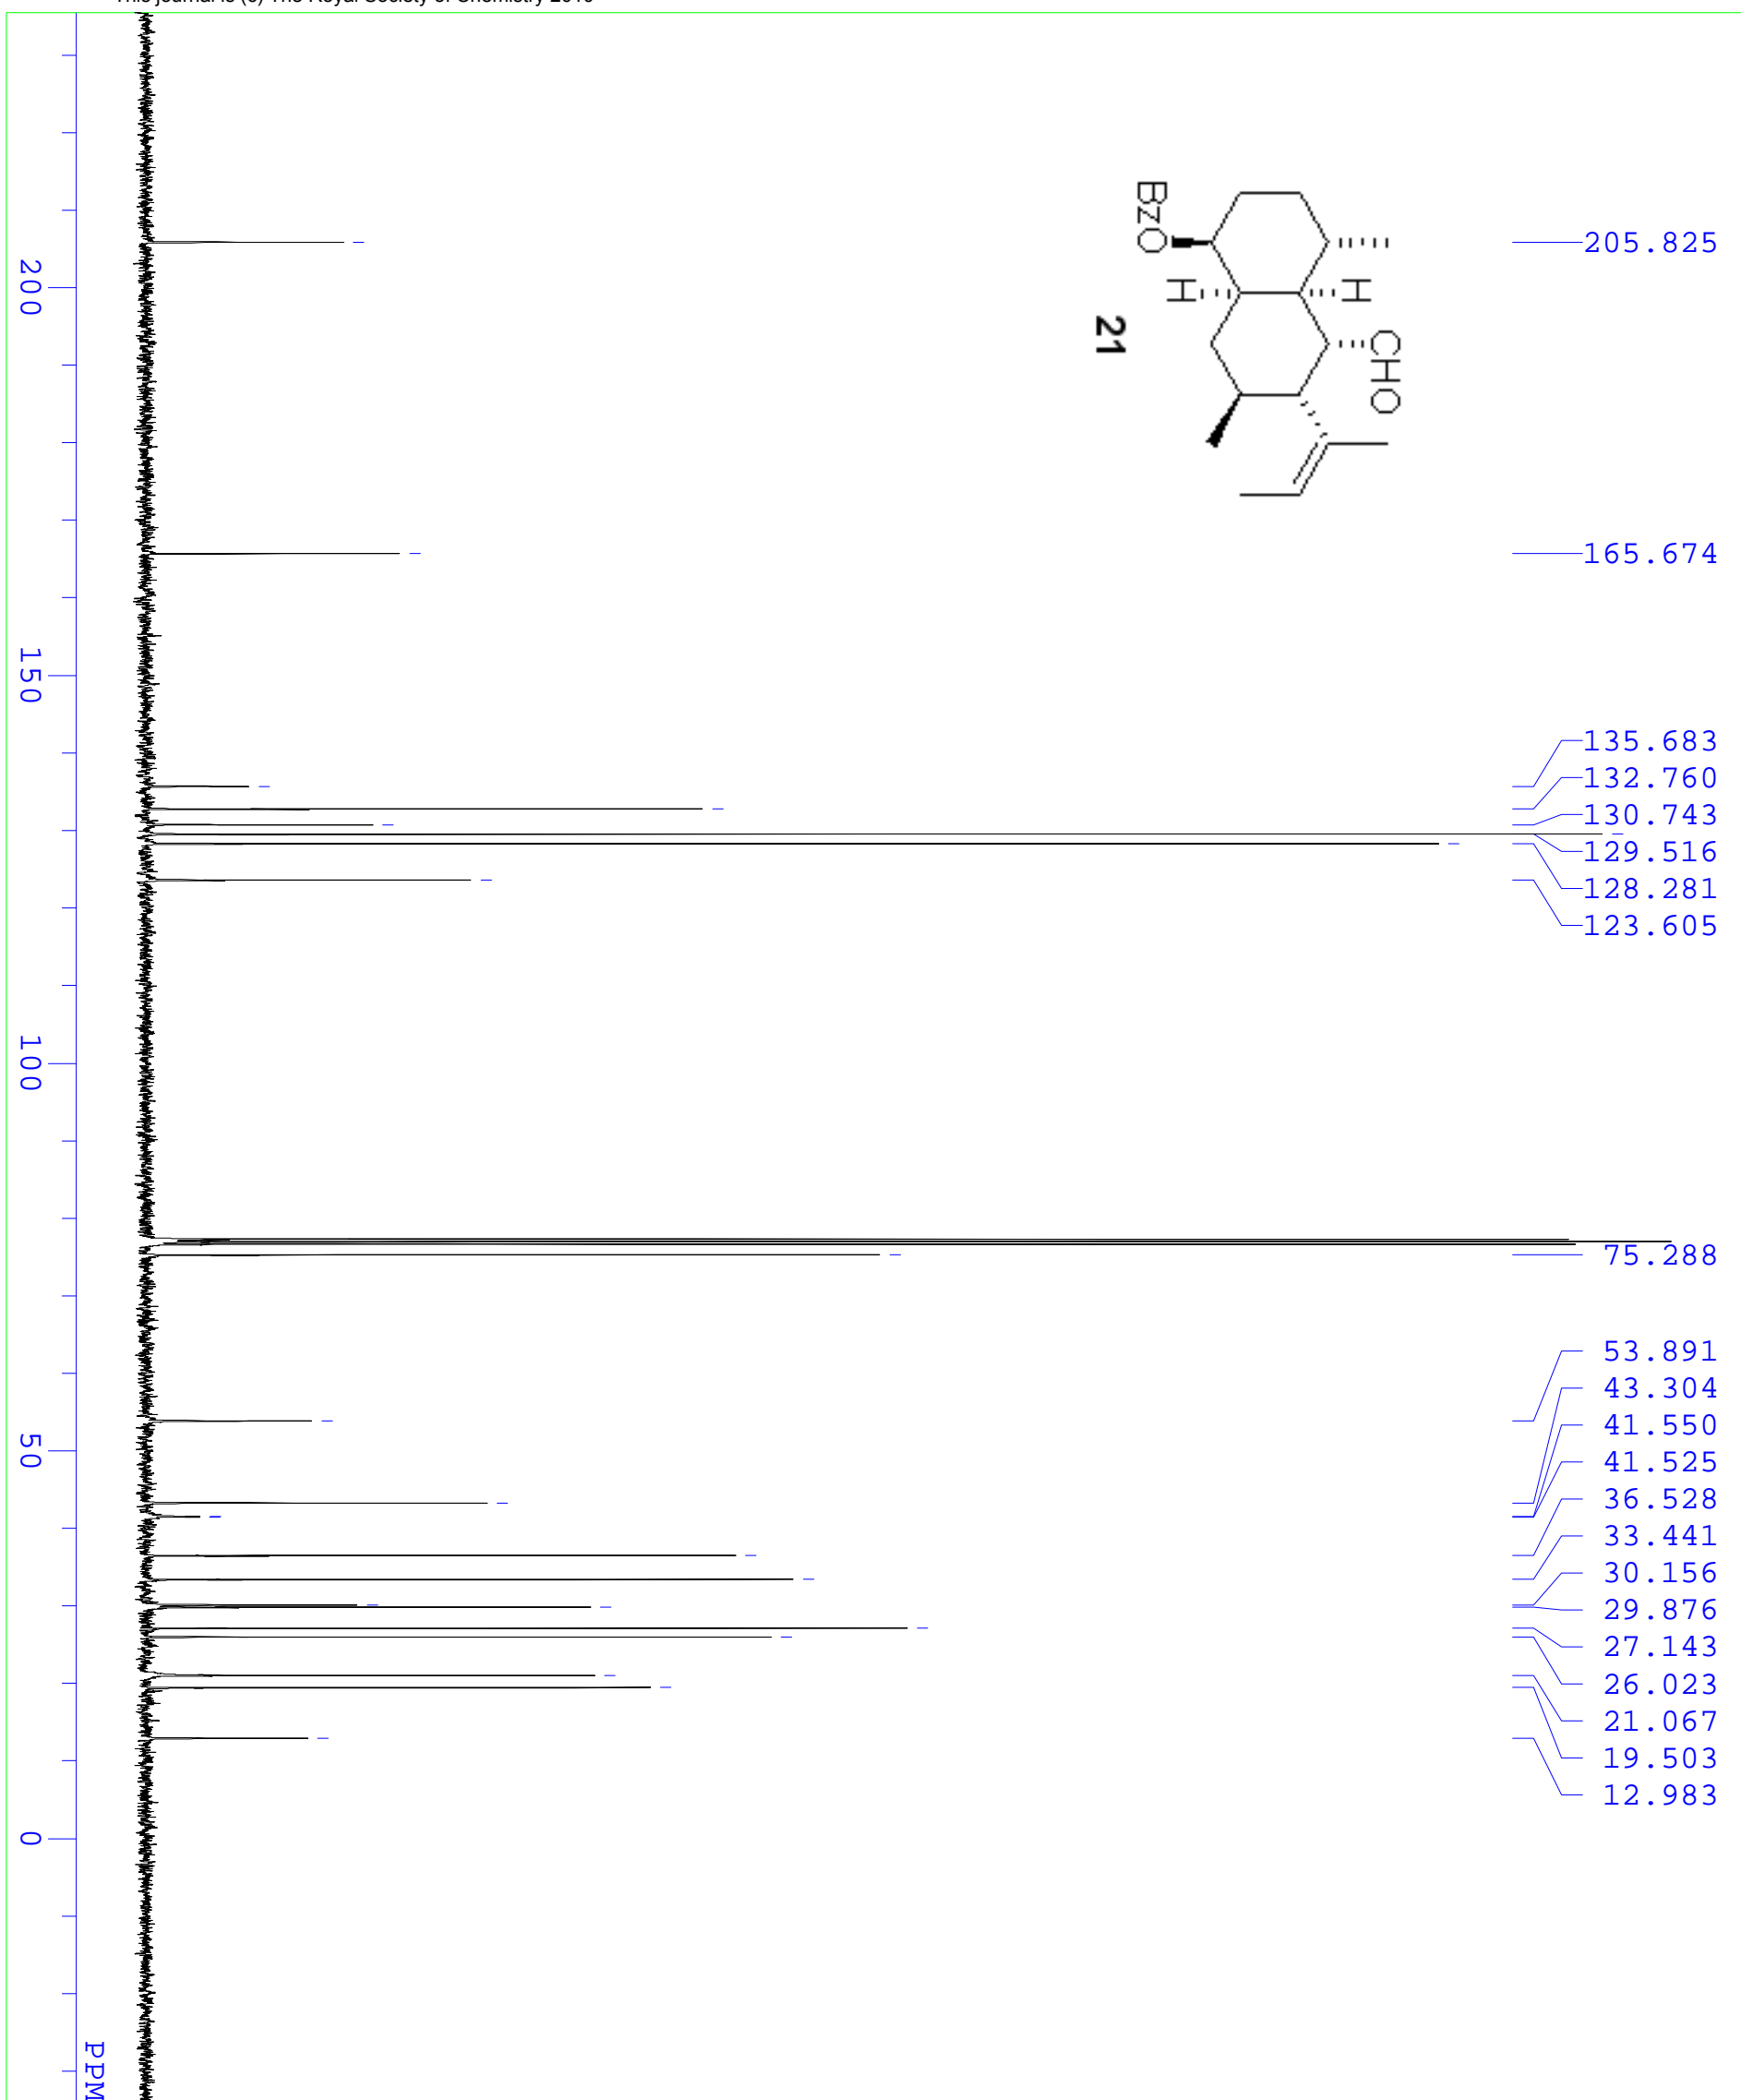

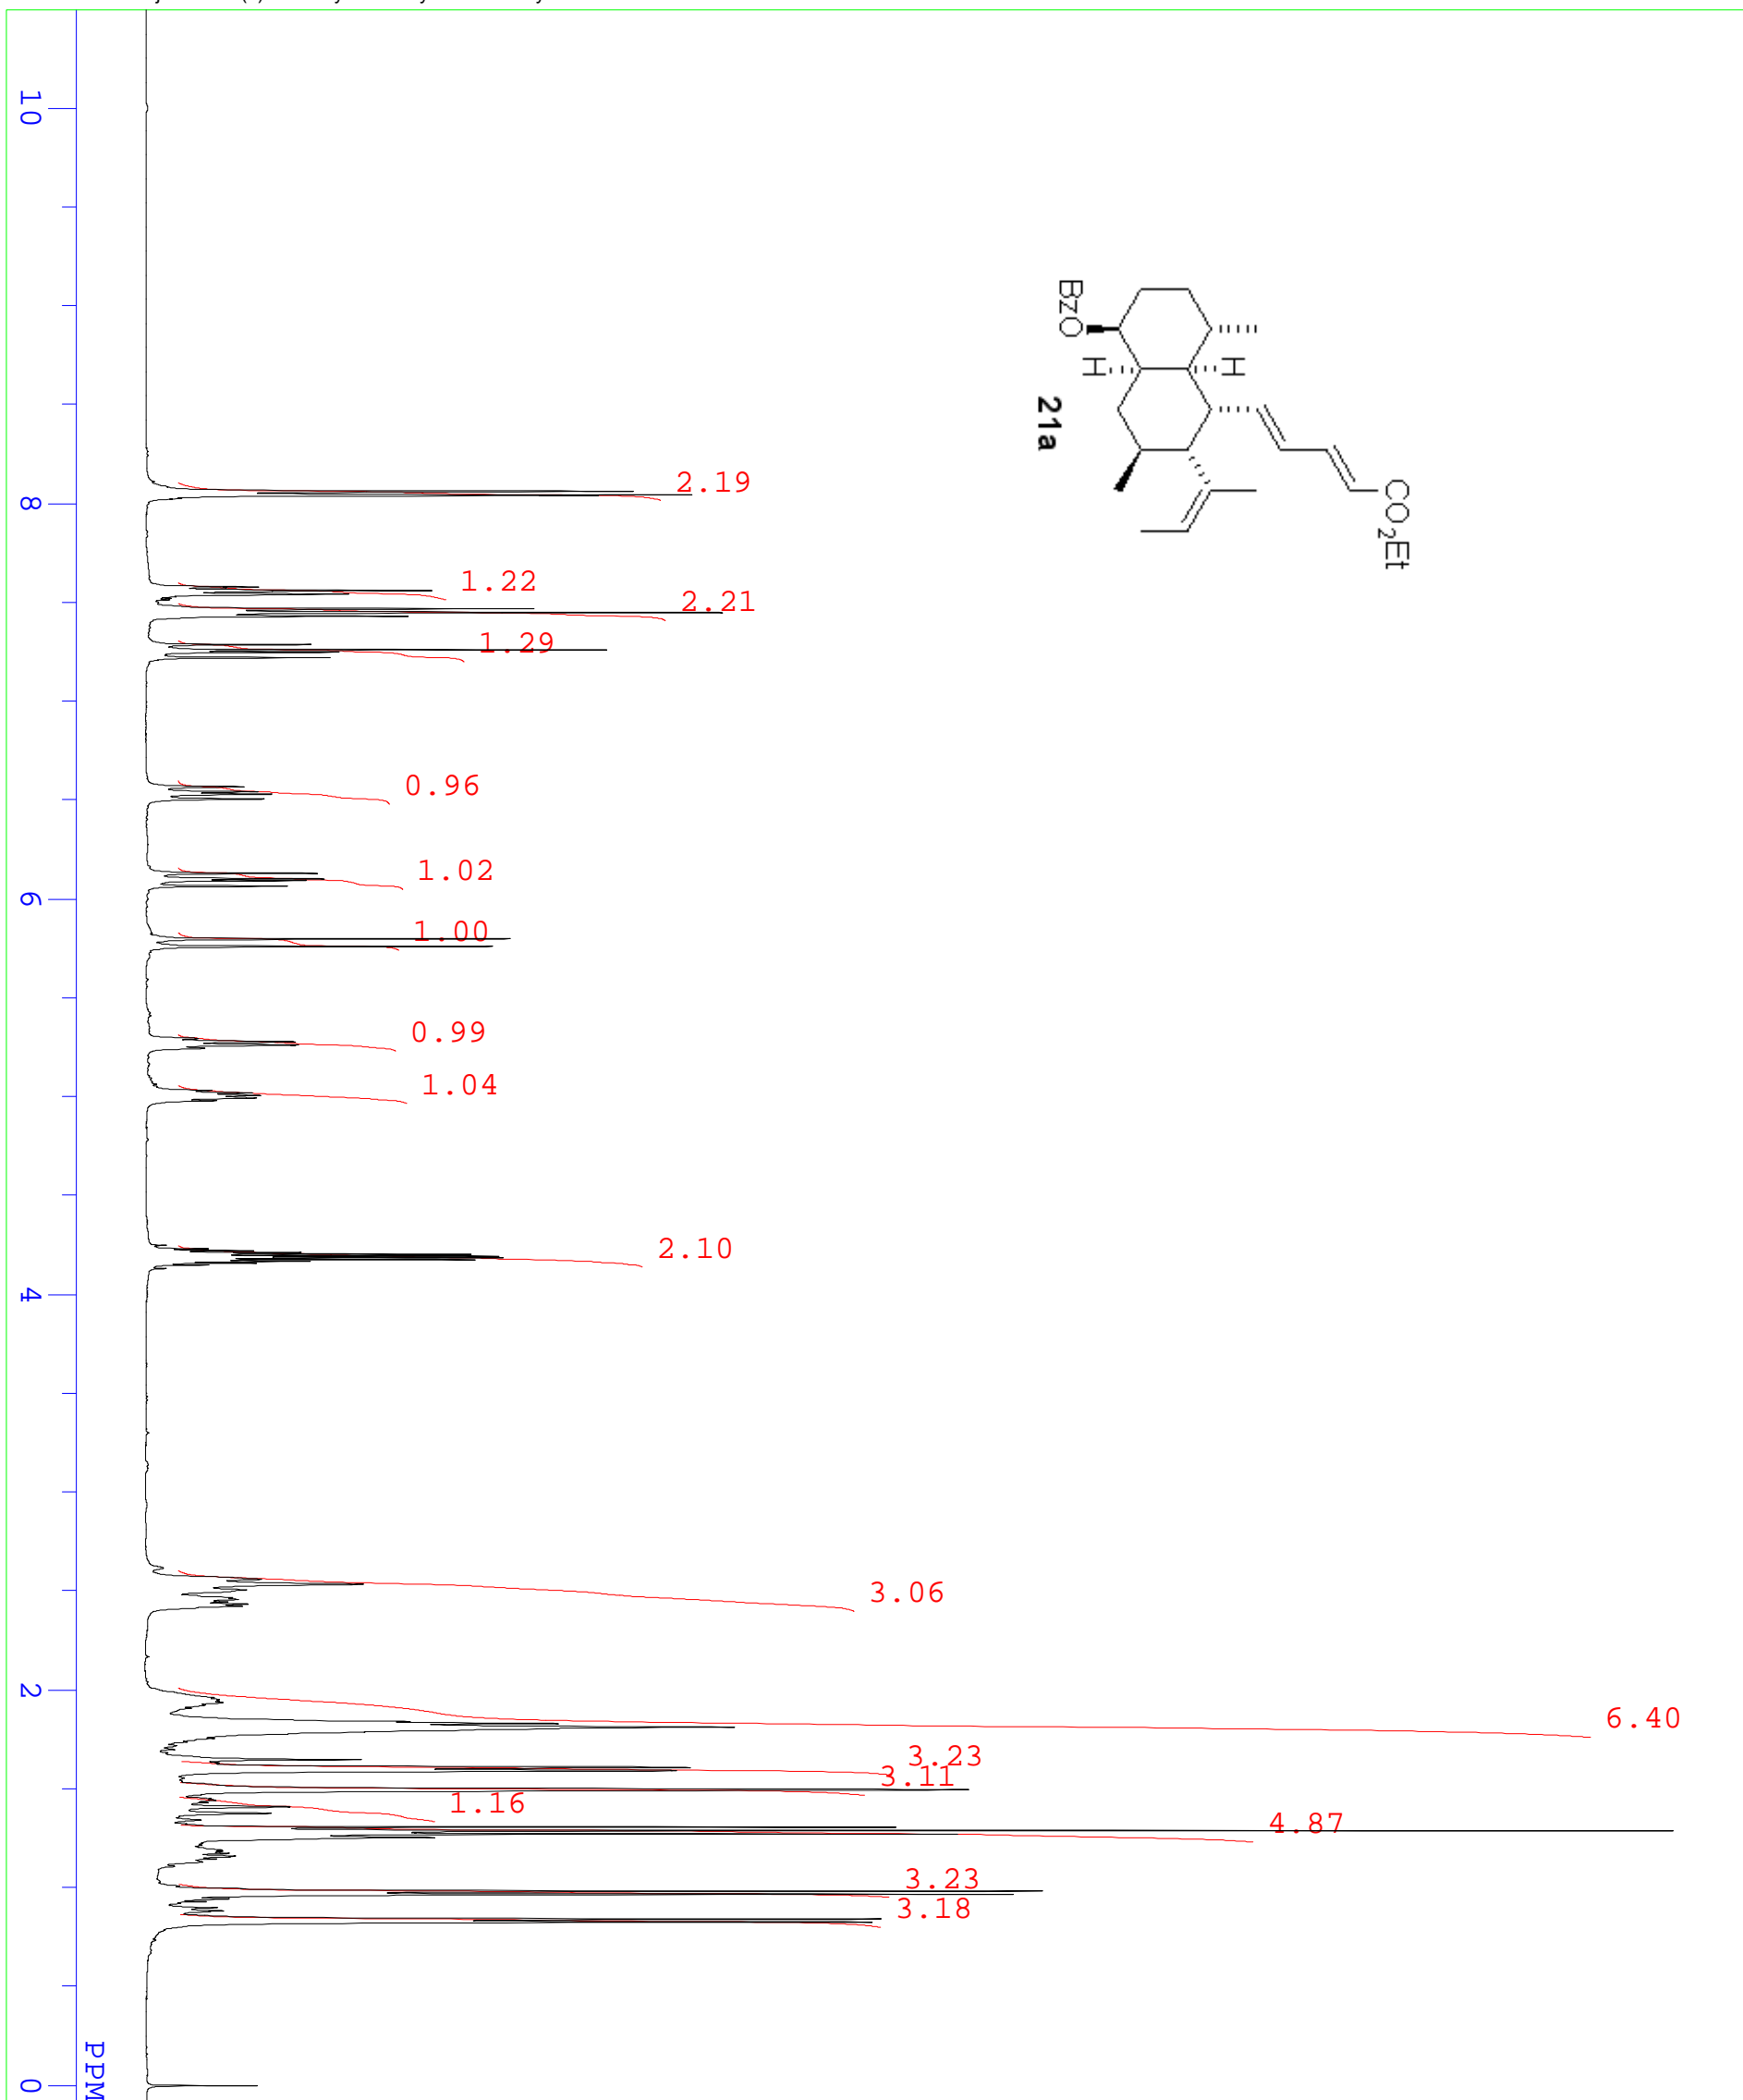

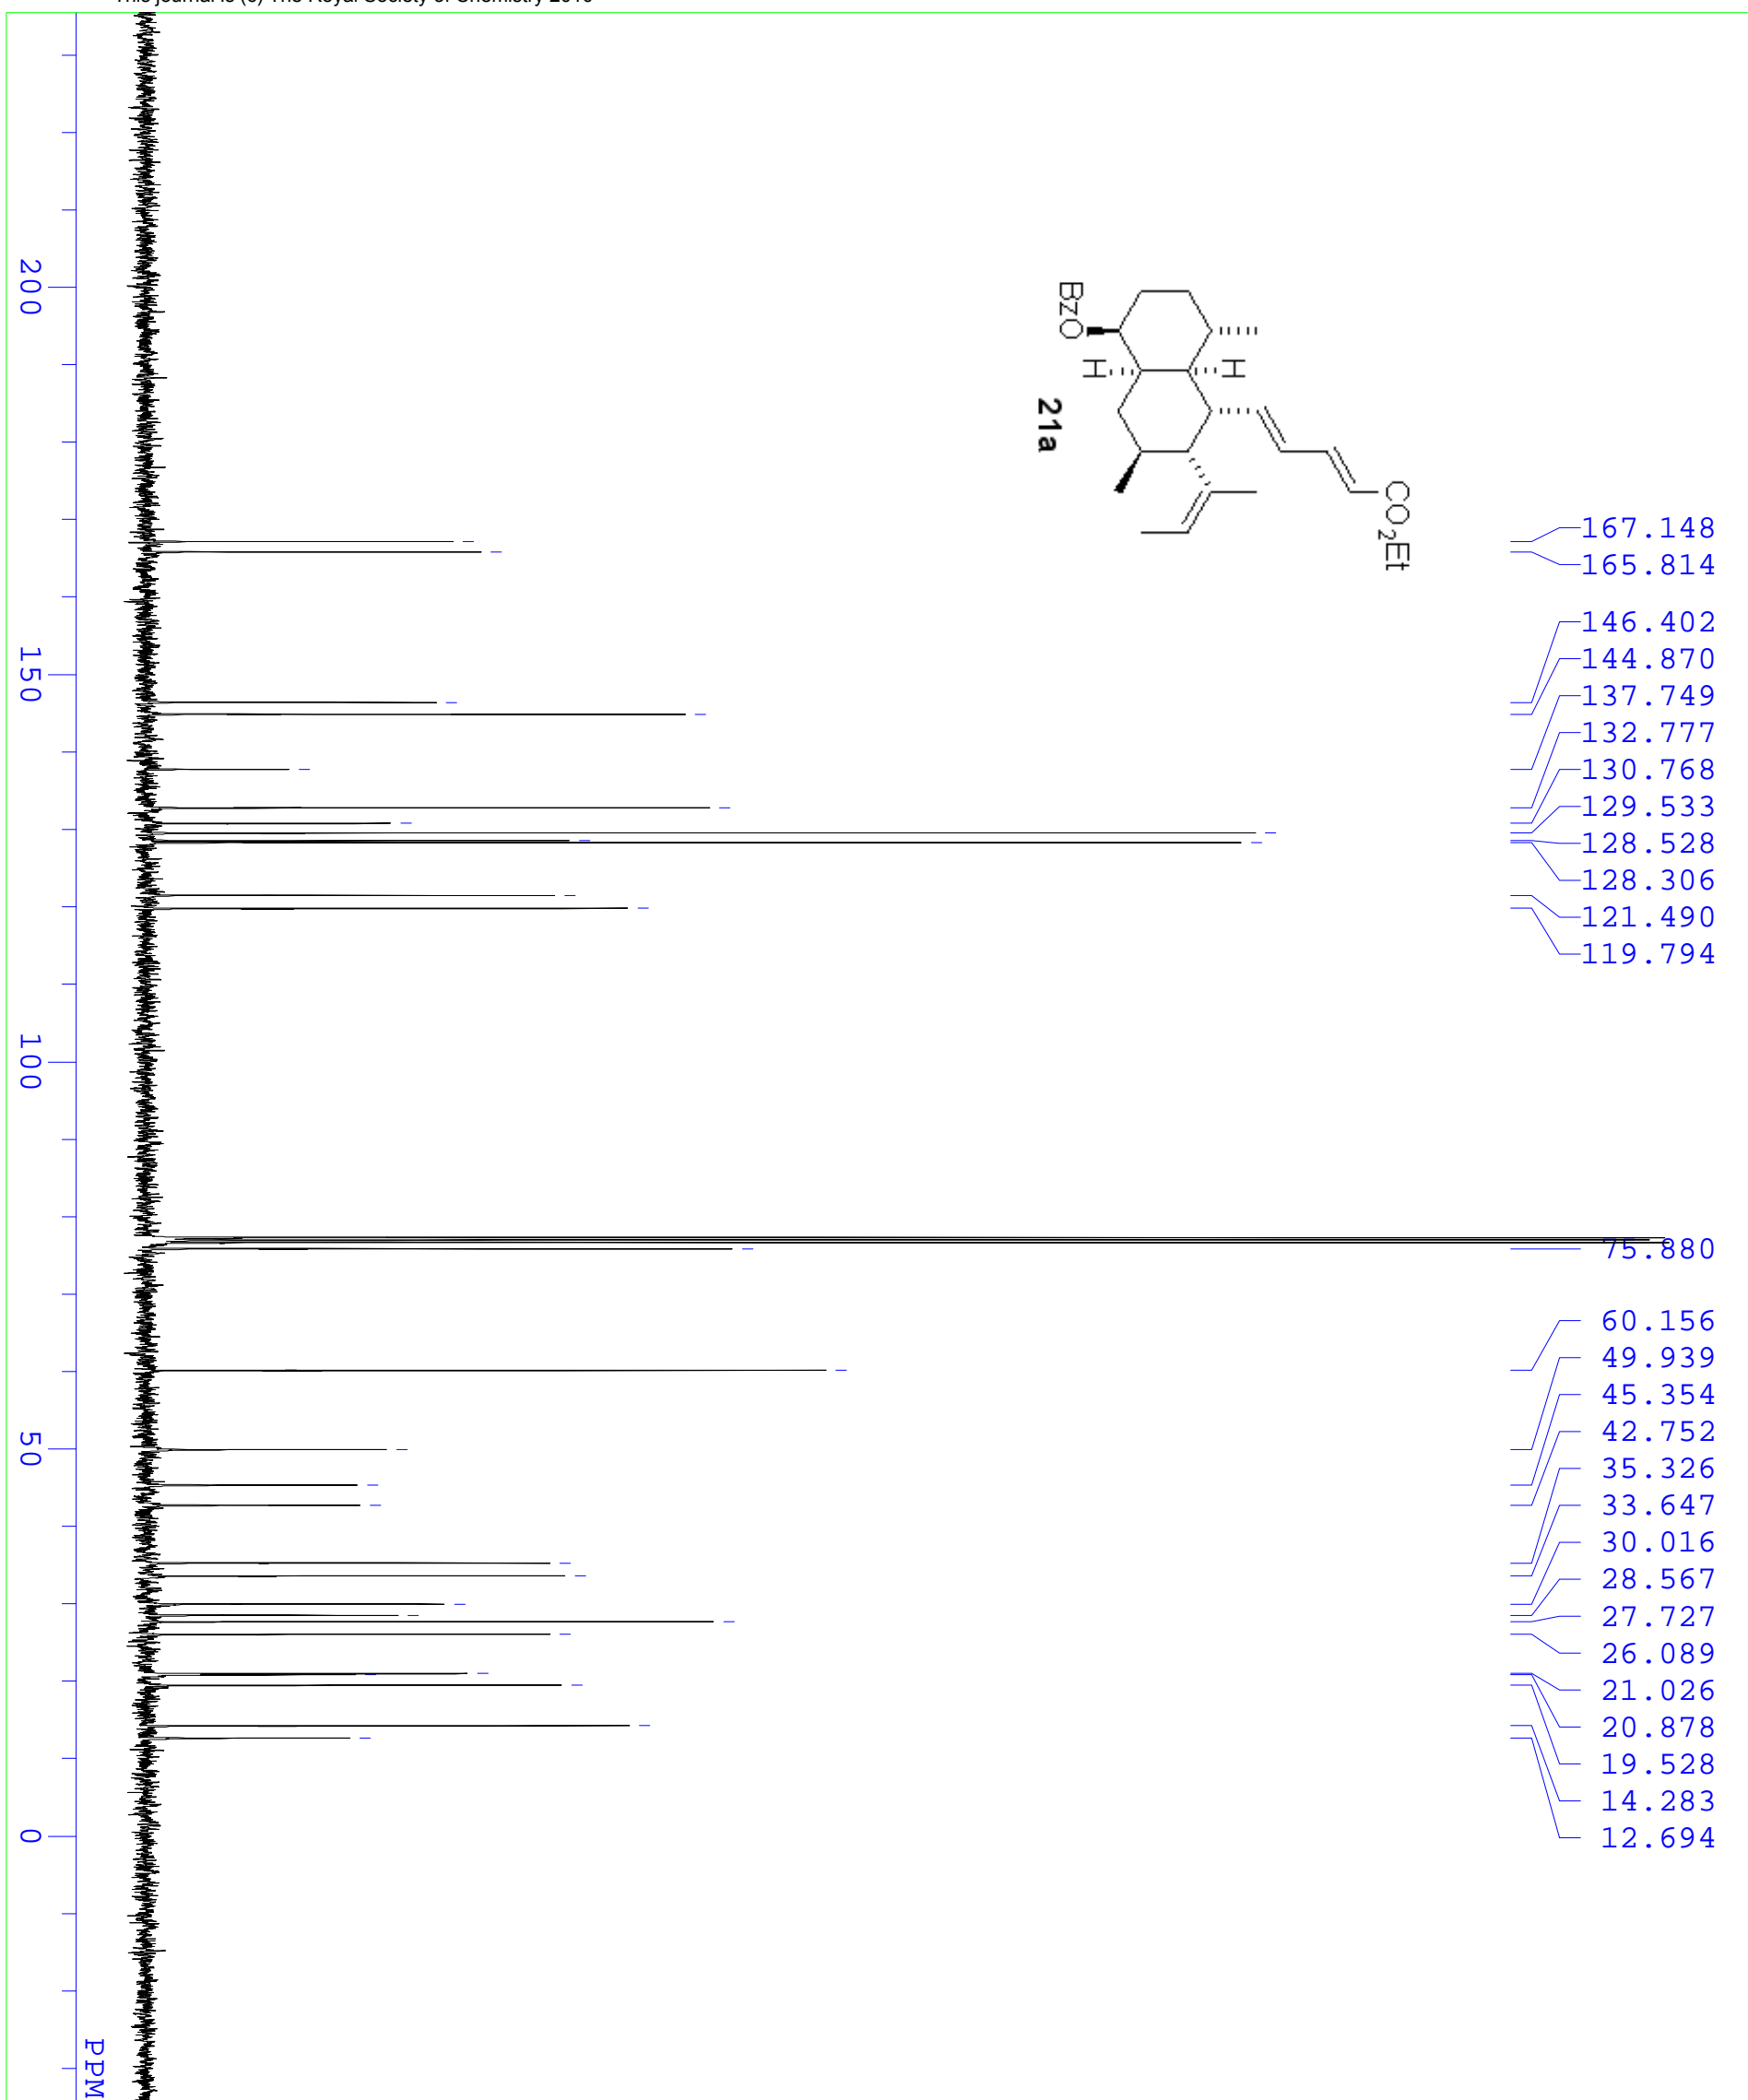

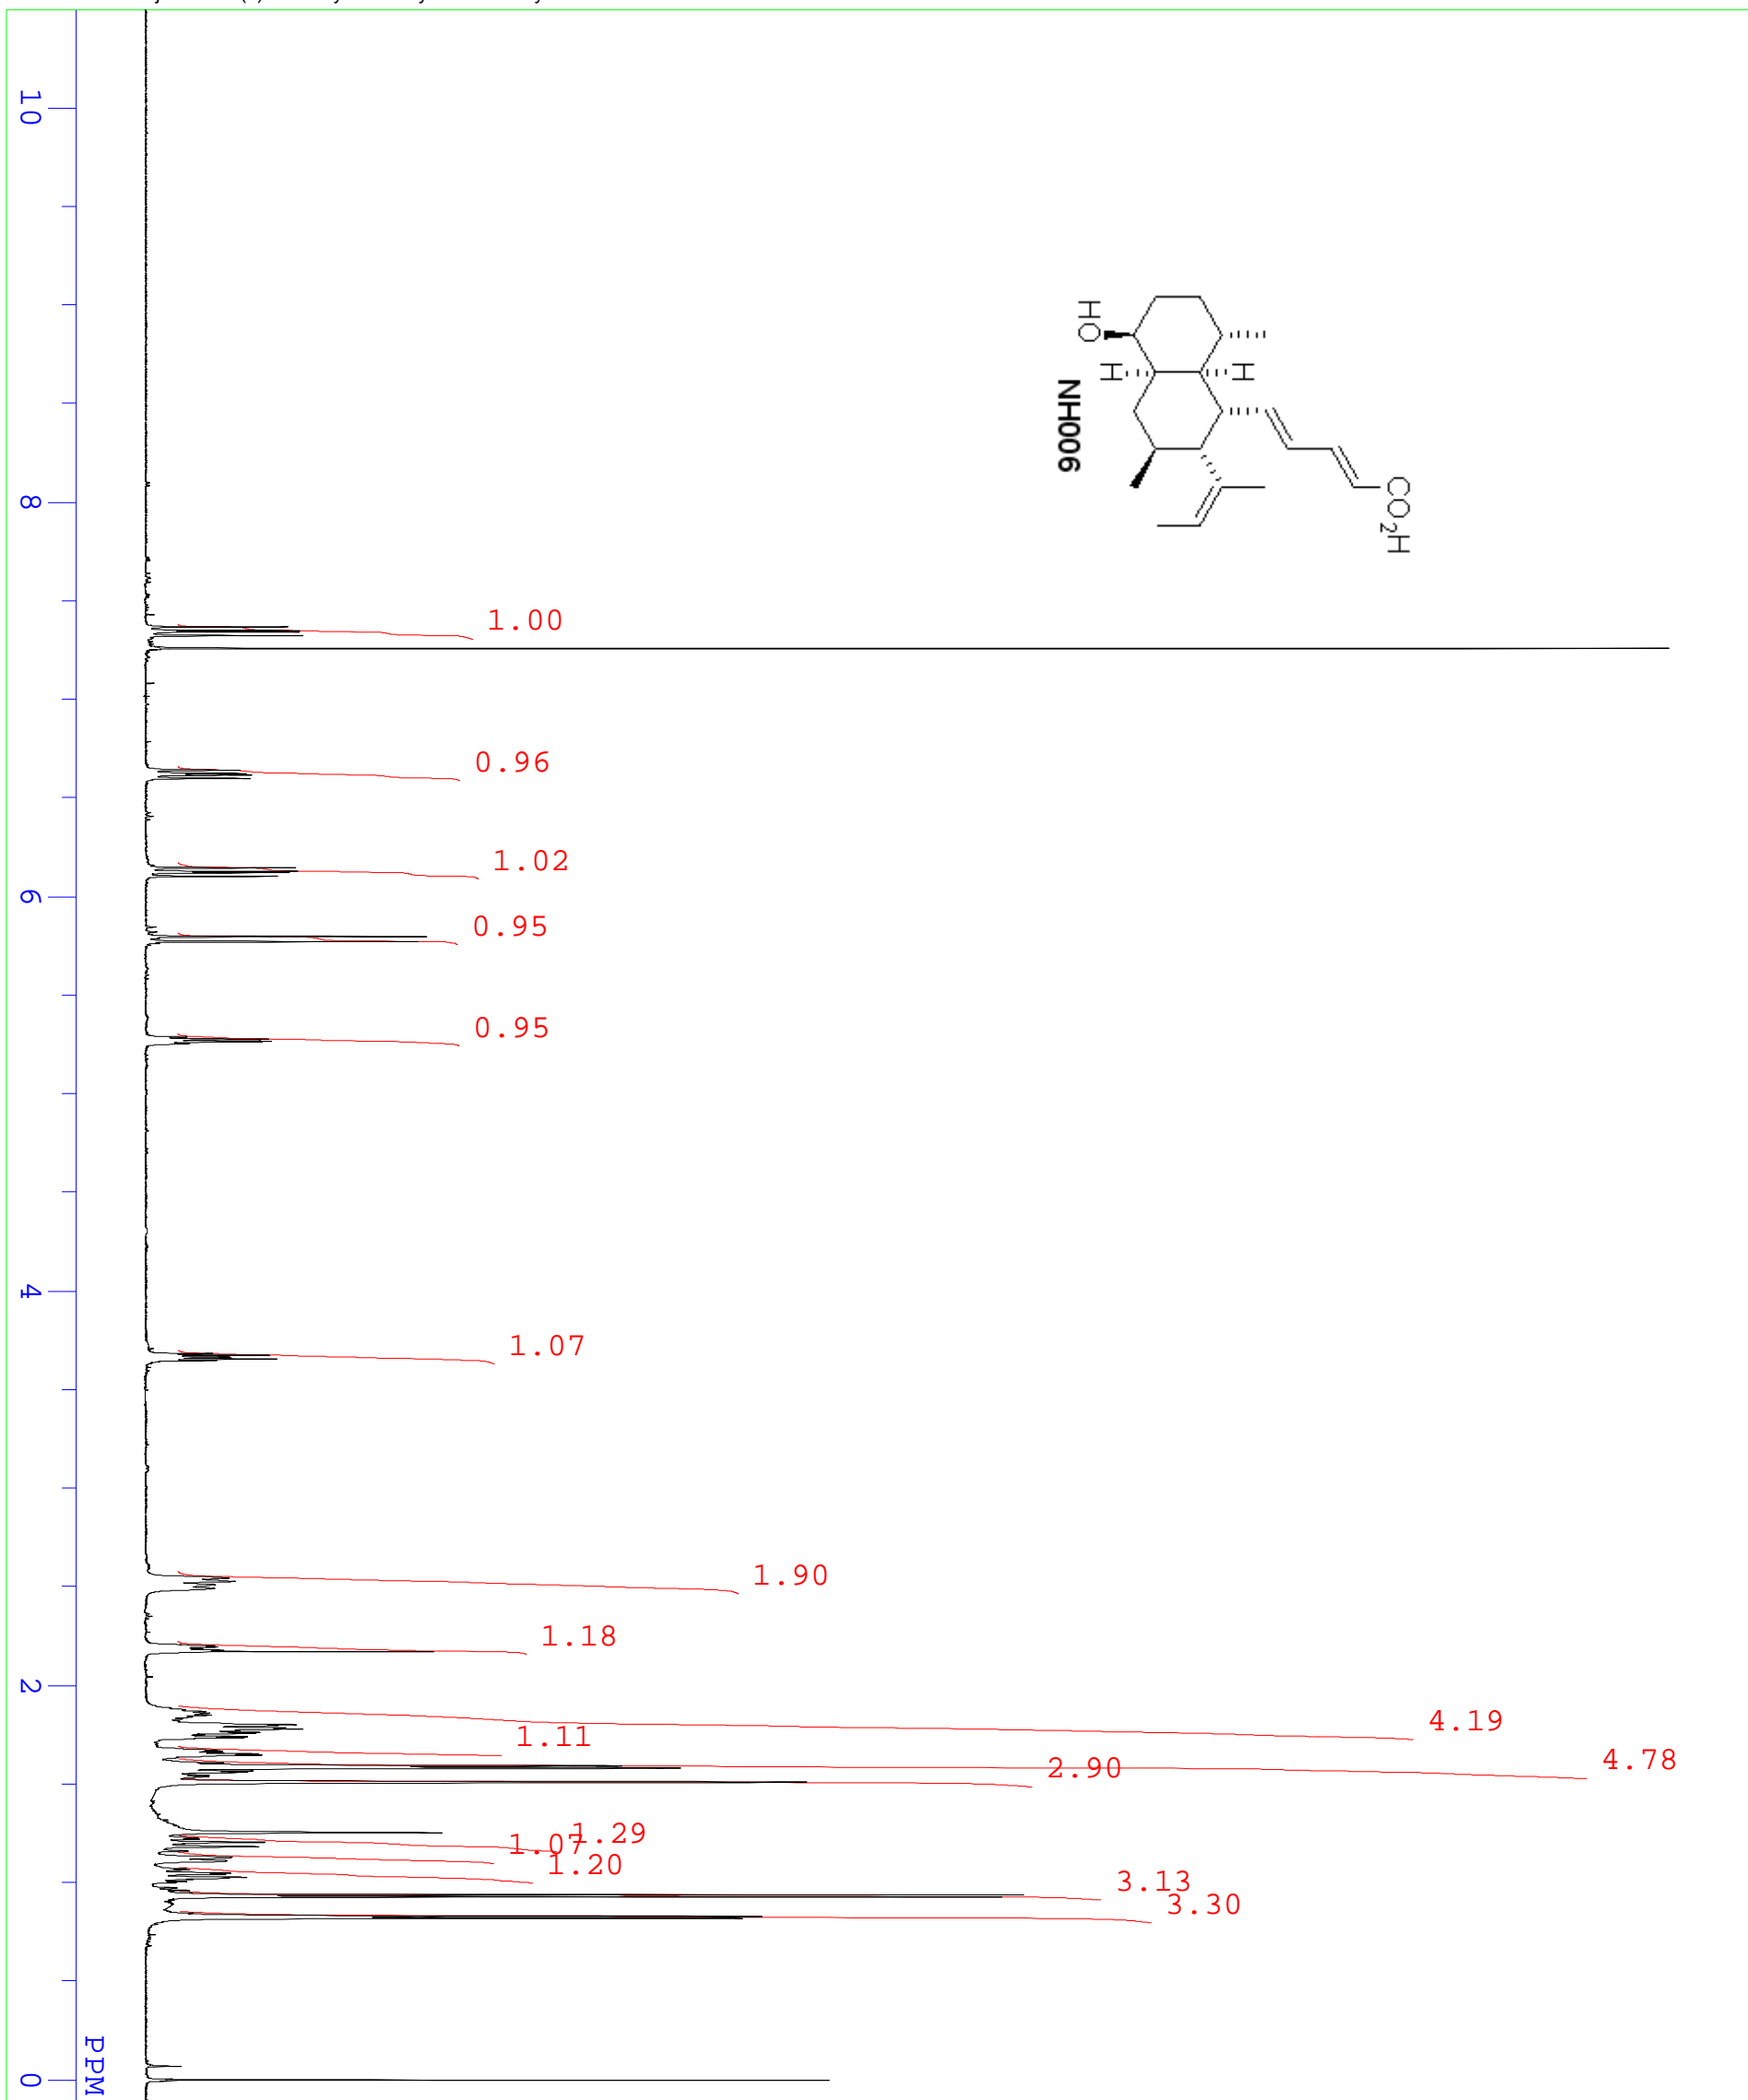



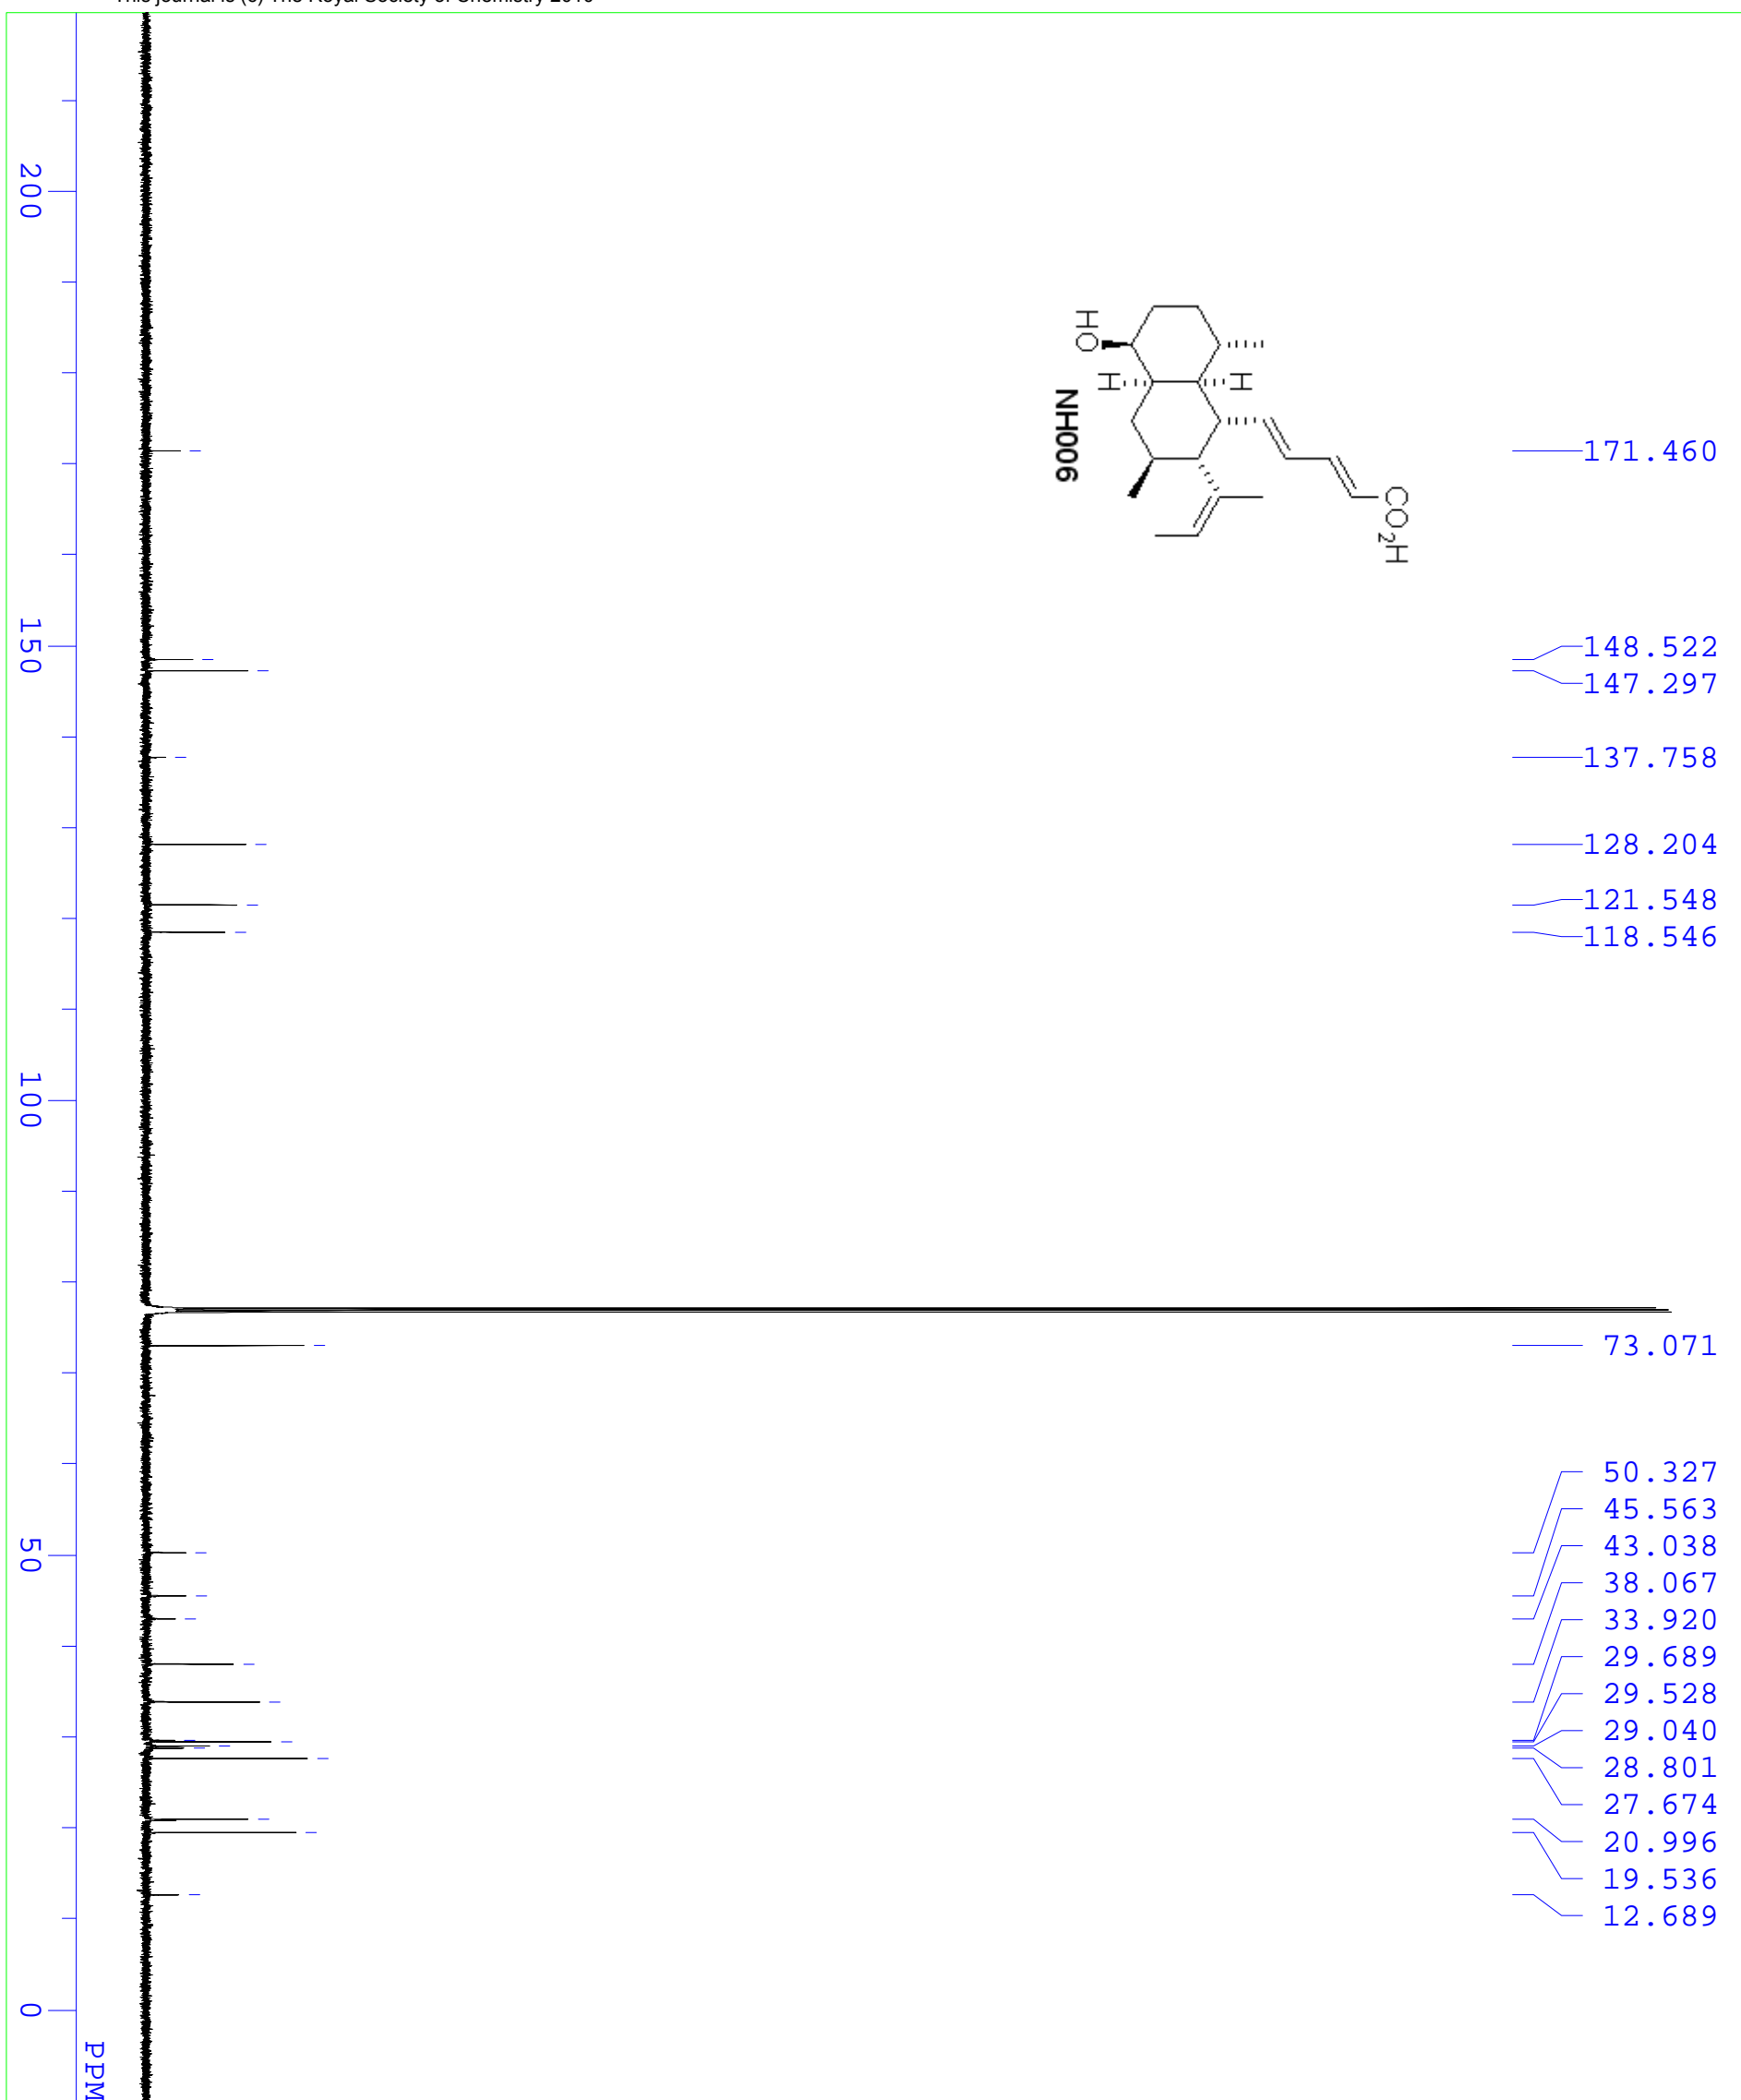

Supplement: b924096a.pdf [file b924096a.pdf]
